# Supplementary material for: Modelling the Potential Acute and Post-Acute Burden of COVID-19 Under the Australian Border Re-Opening Plan
Source: Research Square preprint supplement (doi:10.21203/rs.3.rs-1066181/v1), 2021-11-30
Supplement: Supplementary file 1 [file 50e89110b6e99a1fbfc25784.xlsx]

## Sheet: Read me
Additional file 1. The DALY COVID-19 Model. The model used to calculate the DALY burden
	Table of Contents
	Model		Description
	1	Scenario 1	Using ONS long COVID data,70% and low seeding infections assuming different combinations of PHSMs and TTIQ effectiveness
	2	Scenario 2	Using ONS long COVID data,70% and high seeding infections assuming different combinations of PHSMs and TTIQ effectiveness
	3	Scenario 3	Using ONS long COVID data, 80% and low, medium or high seeding infections assuming baseline PHSMs and partial TTIQ
	4	Scenario 4	Using ONS long COVID data, 80% and low, medium or high seeding infections assuming baseline PHSMs and optimal TTIQ
	5	Scenario 1 using NSW long COVID data	Using NSW long COVID data, 70% and low seeding infections assuming different combinations of PHSMs and TTIQ effectiveness
	6	Scenario 2 using NSW long COVID data	Using NSW long COVID data, 70% and high seeding infections assuming different combinations of PHSMs and TTIQ effectiveness
	7	Scenario 3 using NSW long COVID data	Using NSW long COVID data, 80% and low, medium or high seeding infections assuming baseline PHSMs and partial TTIQ
	8	Scenario 4 using NSW long COVID data	Using NSW long COVID data, 80% and low, medium or high seeding infections assuming baseline PHSMs and optimal TTIQ
	10	DALYS Australia Base	Base Model using actual data
	11	DALYS Australia Sensitivity_ONS	Sensitivity analysis of the base model*
	12	DALYS Australia Sensitivity NSW	Sensitivity analysis using the NSW post-acute estimates*
	13	DALYS Australia Sensitivity 28d	Sensitivity analysis using the symptomactic recovery duration of 28 days*
	Inputs
	1	Doherty Data	Doherty input data
	2	Doherty Adjusted Data	Doherty tables and numbers included in the Doherty input data
	3	AusLT17-19	Lifetables as reported in the ABS
	4	AgeDCovid	Number of COVID death cases in Australia
	5	Aus COVID Cases	Number of COVID cases used in the model
	6	ONS POST ACUTE	ONS data and extrapolation of Long COVID
	7	NSW POST ACUTE	NSW data and extrapolation of Long COVID
	8	Permanent Disb	Data inputs used in the permanent disability state
	Results
	1	Ersatz results	Ersatz results
	2	ERSATZ Analysis (table summary)	Ersatz results and analysis
	3	Long COVID analysis W/O perm and pics	Long COVID incidence without Perm and PICS included in the analysis
	4	Ersatz raw results baseline	Ersatz raw (not yet formatted) results using base line values
	5	Ersatz raw results 5%	Ersatz raw (not yet formatted) results using 5% increase of acute state noted in model test
	6	Ersatz raw results 10%	Ersatz raw (not yet formatted) results using 10% increase of acute state noted in model test
	Note	Ersazt needs to be installed to read the file for Ersatz results. Therefore Ersatz results and functions were presented in screenshots
		PHSM=Public Health and Social Measures*
		TTIQ=Test, Trace, Isolate, Quarantine*
		Seeding="The initial number of daily cases present in the population at a given vaccination threshold"*
		Chronic=Long COVID

## Sheet: Scenario I
DALYS Calculation (Scenario 1: 70% and low seeding infections assuming different combinations of PHSMs and TTIQ effectiveness)
Back to "read me"
Mortality (YLL)
				DEATH						YLL
	Age	Mid	LETotals	Scenario IA_V (Vaccinated)	Scenario IA_U (Unvaccinated)	Scenario IB_V (Vaccinated)	Scenario IB_U (Unvaccinated)	Scenario IC_V (Vaccinated)	Scenario IC_U (Unvaccinated)	Scenario IA_V (Vaccinated)	Scenario IA_U (Unvaccinated)	Scenario IB_V (Vaccinated)	Scenario IB_U (Unvaccinated)	Scenario IC_V (Vaccinated)	Scenario IC_U (Unvaccinated)
	0-9	5	78.2138	0	0	0	0	0	0	0	0	0	0	0	0
	10-19	15	68.2659	1.41622	2.94109	0.0252487	0.0558531	0.00994644	0.0221882	96.6795	200.776	1.72362	3.81286	0.679002	1.5147
	20-29	25	58.5115	9.91354	20.5876	0.176741	0.390972	0.0696251	0.155318	580.057	1204.61	10.3414	22.8764	4.07387	9.08787
	30-39	35	48.8546	12.746	26.4698	0.227238	0.502678	0.089518	0.199694	622.699	1293.17	11.1016	24.5581	4.37336	9.75596
	40-49	45	39.3018	29.7406	61.7628	0.530222	1.17292	0.208875	0.465953	1168.86	2427.39	20.8387	46.0976	8.20917	18.3128
	50-59	55	30.0933	77.8921	161.76	1.38868	3.07192	0.547054	1.22035	2344.03	4867.88	41.7898	92.4442	16.4627	36.7244
	60-69	65	21.403	133.125	276.462	2.37337	5.25019	0.934966	2.08569	2849.26	5917.11	50.7972	112.37	20.011	44.64
	70-79	75	13.4485	356.888	741.154	6.36266	14.075	2.5065	5.59143	4799.6	9967.41	85.5683	189.287	33.7087	75.1964
	80-89	85	7.10454	718.024	1491.13	12.8011	28.3175	5.04285	11.2494	5101.23	10593.8	90.9457	201.183	35.8271	79.922
	90-100	95	3.45069	511.256	1061.73	9.11477	20.163	3.59067	8.00995	1764.18	3663.7	31.4522	69.5761	12.3903	27.6398
	weighted mean/Total			1851	3844	33	73	13	29	19326.6	40135.8	344.558	762.205	135.735	302.794
Morbidity (YLD)
PARAMETERS
AUSTALIAN POPULATION			Scenario IA_V (Vaccinated)	Scenario IA_U (Unvaccinated)	Scenario IB_V (Vaccinated)	Scenario IB_U (Unvaccinated)	Scenario IC_V (Vaccinated)	Scenario IC_U (Unvaccinated)			Scenario IA_V (Vaccinated)	Scenario IA_U (Unvaccinated)	Scenario IB_V (Vaccinated)	Scenario IB_U (Unvaccinated)	Scenario IC_V (Vaccinated)	Scenario IC_U (Unvaccinated)		PICS:ICU Survival	Scenario IA_V (Vaccinated)	Scenario IA_U (Unvaccinated)	Scenario IB_V (Vaccinated)	Scenario IB_U (Unvaccinated)	Scenario IC_V (Vaccinated)	Scenario IC_U (Unvaccinated)
Australian COVID case (without death)			138896	727636	2897	18788	1100	6871		Mild/Moderate	128997	702887	2710	18243	1028	6656		60-69	282.313	310.739	4.61613	5.10204	1.94364	2.18659
Australian poulation as of 31Dec2020 (e)			25694393	25694393	25694393	25694393	25694393	25694393		Severe	9431	23680	182	524	68	203		70-79	129.252	142.266	2.11341	2.33587	0.889857	1.00109
Australian COVID case with deaths			140747	731480	2930	18861	1113	6900		Critical	2319	4913	38	94	17	41		80-89	30.6123	33.6946	0.500545	0.553233	0.210756	0.2371
Ausrtalian COVID cases (>10 and above)			138896	398065	2897	10051.9	1100	3841.88										90+	0	0	0	0	0	0
Australian COVID cases (Hosp without death; >30 years old)			106880	158676	2174.83	3830.5	813	1515.33										Totals	442.177	486.699	7.23009	7.99115	3.04425	3.42478
YEAR			365.25
DISABILITY WEIGHTS (g)			MID	LL	UL	sigma	alpha1	alpha2	ERSATZ
DW(Moderate)			0.051	0.032	0.074	0.0107143	21.4511	399.158	#NAME?
DW(Severe)			0.133	0.088	0.19	0.0260204	22.5184	146.793	#NAME?
DW(Critical)			0.655	0.579	0.727	0.0377551	103.182	54.3476	#NAME?
DW(Chronic)			0.219	0.148	0.308	0.0408163	22.2649	79.4013	#NAME?
DW(Afib as proxy for PICS) (i)			0.224	0.151	0.312	0.0410714	22.8582	79.1875	#NAME?
SEVERITY DISTRIBUTION
ACUTE (Proportion)			%	Duration (days)
N Asymptomatic (will not be added in the YLD) (h)			NA	14
N(Moderate) (a)			NA	14
N(Severe) (a)			NA	14
N(Critical)* (a)			NA	14
CHRONIC			%	Duration (days)		OR	95%CI LL	95%CI UL	RR	LL	UL	SE	ERSATZ
Post (acute) after symptomatic duration to 2 years			See ONS Post-Acute Sheet		Treatment effect of full dose of COVID vaccine	0.51	0.32	0.82	0.540174	0.346891	0.837179	0.0923705	#NAME?
Post-intesive care syndrome			%	Duration (days)
1) PICS			0.906	RLE
Permanent functional impairment			%	LL	UL		Duration	sigma	alpha1	alpha2	ERSATZ
2) Diabetes			0.0282921	0.0256649	0.0312028		RLE	0.00141273	389.685	13384	#NAME?
3) Parkinsons			0.0011	0.00079	0.0014		RLE	0.000155612	49.9126	45325.2	#NAME?
4) Dementia			0.0067	0.0059	0.0075		RLE	0.000408163	267.64	39678.7	#NAME?
5) Anxiety Disorders			0.0711	0.0682	0.0741		RLE	0.0015051	2072.82	27080.8	#NAME?
5) Ischaemic Stroke			0.0076	0.0068	0.0085		RLE	0.000433673	304.774	39797	#NAME?
ACUTE
Morbidity calculation (Total incidence cases/Checking/Scenario analysis)
			Scenario 1A						Scenario IB						Scenario IC
			Scenario IA_V (Vaccinated)			Scenario IA_U (Unvaccinated)			Scenario IB_V (Vaccinated)			Scenario IB_U (Unvaccinated)			Scenario IC_V (Vaccinated)			Scenario IC_U (Unvaccinated)
				Case (Person - years)	YLD		Case (Person - years)	YLD		Case (Person - years)	YLD		Case (Person - years)	YLD		Case (Person - years)	YLD		Case (Person - years)	YLD
			Base	Base	Base DL	Base	Base	Base DL	Base	Base	Base DL	Base	Base	Base DL	Base	Base	Base DL	Base	Base	Base DL
	Moderate		128997	4944.44	#NAME?	702887	26941.6	#NAME?	2710	103.874	#NAME?	18243	699.253	#NAME?	1028	39.4031	#NAME?	6656	255.124	#NAME?
	Severe		9431	361.489	#NAME?	23680	907.652	#NAME?	182	6.97604	#NAME?	524	20.0849	#NAME?	68	2.60643	#NAME?	203	7.78097	#NAME?
	Critical		2319	88.8871	#NAME?	4913	188.315	#NAME?	38	1.45654	#NAME?	94	3.60301	#NAME?	17	0.651608	#NAME?	41	1.57153	#NAME?
	TOTAL				#NAME?			#NAME?			#NAME?			#NAME?			#NAME?			#NAME?
CHRONIC/LONG COVID
										SCENARIO IA								SCENARIO IB								SCENARIO IC
			ONS			ERSATZ				Scenario IA_V (Vaccinated)				Scenario IA_U (Unvaccinated)				Scenario IB_V (Vaccinated)				Scenario IB_U (Unvaccinated)				Scenario IC_V (Vaccinated)				Scenario IC_U (Unvaccinated)					Conversion check
	weeks		Baseline	LL	UL	sigma	alpha1	alpha2	Ersazt	Recalculation (mutually exclusive)	Incidence	DALYs/year	DALYS per 100,000	Recalculation (mutually exclusive)	Incidence	DALYs/year	DALYS per 100,000	Recalculation (mutually exclusive)	Incidence	DALYs/year	DALYS per 100,000	Recalculation (mutually exclusive)	Incidence	DALYs/year	DALYS per 100,000	Recalculation (mutually exclusive)	Incidence	DALYs/year	DALYS per 100,000	Recalculation (mutually exclusive)	Incidence	DALYs/year	DALYS per 100,000		Conversation Prob to rate	R	Rate to Prob	Formula	Match	Match
	0		0.3111	0.2887	0.3358	0.0120153	461.524	1022	#NAME?	#NAME?	#NAME?	#NAME?	#NAME?	#NAME?	#NAME?	#NAME?	#NAME?	#NAME?	#NAME?	#NAME?	#NAME?	#NAME?	#NAME?	#NAME?	#NAME?	#NAME?	#NAME?	#NAME?	#NAME?	#NAME?	#NAME?	#NAME?	#NAME?		#NAME?	#NAME?	#NAME?	#NAME?	#NAME?	#NAME?
	1		0.29269	0.268376	0.319742	0.0131037	352.594	852.073	#NAME?	#NAME?	#NAME?	#NAME?	#NAME?	#NAME?	#NAME?	#NAME?	#NAME?	#NAME?	#NAME?	#NAME?	#NAME?	#NAME?	#NAME?	#NAME?	#NAME?	#NAME?	#NAME?	#NAME?	#NAME?	#NAME?	#NAME?	#NAME?	#NAME?		#NAME?	#NAME?	#NAME?	#NAME?	#NAME?	#NAME?
	2		0.27537	0.249482	0.304453	0.0140231	279.148	734.574	#NAME?	#NAME?	#NAME?	#NAME?	#NAME?	#NAME?	#NAME?	#NAME?	#NAME?	#NAME?	#NAME?	#NAME?	#NAME?	#NAME?	#NAME?	#NAME?	#NAME?	#NAME?	#NAME?	#NAME?	#NAME?	#NAME?	#NAME?	#NAME?	#NAME?		#NAME?	#NAME?	#NAME?	#NAME?	#NAME?	#NAME?
	3		0.259074	0.231919	0.289894	0.0147896	227.1	649.482	#NAME?	#NAME?	#NAME?	#NAME?	#NAME?	#NAME?	#NAME?	#NAME?	#NAME?	#NAME?	#NAME?	#NAME?	#NAME?	#NAME?	#NAME?	#NAME?	#NAME?	#NAME?	#NAME?	#NAME?	#NAME?	#NAME?	#NAME?	#NAME?	#NAME?		#NAME?	#NAME?	#NAME?	#NAME?	#NAME?	#NAME?
	4		0.243743	0.215592	0.276032	0.0154183	188.756	585.651	#NAME?	#NAME?	#NAME?	#NAME?	#NAME?	#NAME?	#NAME?	#NAME?	#NAME?	#NAME?	#NAME?	#NAME?	#NAME?	#NAME?	#NAME?	#NAME?	#NAME?	#NAME?	#NAME?	#NAME?	#NAME?	#NAME?	#NAME?	#NAME?	#NAME?		#NAME?	#NAME?	#NAME?	#NAME?	#NAME?	#NAME?
	5		0.229319	0.200415	0.262832	0.0159229	159.621	536.443	#NAME?	#NAME?	#NAME?	#NAME?	#NAME?	#NAME?	#NAME?	#NAME?	#NAME?	#NAME?	#NAME?	#NAME?	#NAME?	#NAME?	#NAME?	#NAME?	#NAME?	#NAME?	#NAME?	#NAME?	#NAME?	#NAME?	#NAME?	#NAME?	#NAME?		#NAME?	#NAME?	#NAME?	#NAME?	#NAME?	#NAME?
	6		0.215749	0.186306	0.250264	0.0163159	136.914	497.684	#NAME?	#NAME?	#NAME?	#NAME?	#NAME?	#NAME?	#NAME?	#NAME?	#NAME?	#NAME?	#NAME?	#NAME?	#NAME?	#NAME?	#NAME?	#NAME?	#NAME?	#NAME?	#NAME?	#NAME?	#NAME?	#NAME?	#NAME?	#NAME?	#NAME?		#NAME?	#NAME?	#NAME?	#NAME?	#NAME?	#NAME?
	7		0.202981	0.17319	0.238297	0.0166089	118.839	466.63	#NAME?	#NAME?	#NAME?	#NAME?	#NAME?	#NAME?	#NAME?	#NAME?	#NAME?	#NAME?	#NAME?	#NAME?	#NAME?	#NAME?	#NAME?	#NAME?	#NAME?	#NAME?	#NAME?	#NAME?	#NAME?	#NAME?	#NAME?	#NAME?	#NAME?		#NAME?	#NAME?	#NAME?	#NAME?	#NAME?	#NAME?
	8		0.19097	0.160997	0.226901	0.0168123	104.195	441.414	#NAME?	#NAME?	#NAME?	#NAME?	#NAME?	#NAME?	#NAME?	#NAME?	#NAME?	#NAME?	#NAME?	#NAME?	#NAME?	#NAME?	#NAME?	#NAME?	#NAME?	#NAME?	#NAME?	#NAME?	#NAME?	#NAME?	#NAME?	#NAME?	#NAME?		#NAME?	#NAME?	#NAME?	#NAME?	#NAME?	#NAME?
	9		0.179669	0.149663	0.216051	0.0169357	92.147	420.725	#NAME?	#NAME?	#NAME?	#NAME?	#NAME?	#NAME?	#NAME?	#NAME?	#NAME?	#NAME?	#NAME?	#NAME?	#NAME?	#NAME?	#NAME?	#NAME?	#NAME?	#NAME?	#NAME?	#NAME?	#NAME?	#NAME?	#NAME?	#NAME?	#NAME?		#NAME?	#NAME?	#NAME?	#NAME?	#NAME?	#NAME?
	10		0.169036	0.139127	0.20572	0.016988	82.1045	403.616	#NAME?	#NAME?	#NAME?	#NAME?	#NAME?	#NAME?	#NAME?	#NAME?	#NAME?	#NAME?	#NAME?	#NAME?	#NAME?	#NAME?	#NAME?	#NAME?	#NAME?	#NAME?	#NAME?	#NAME?	#NAME?	#NAME?	#NAME?	#NAME?	#NAME?		#NAME?	#NAME?	#NAME?	#NAME?	#NAME?	#NAME?
	11		0.159033	0.129333	0.195883	0.016977	73.6369	389.391	#NAME?	#NAME?	#NAME?	#NAME?	#NAME?	#NAME?	#NAME?	#NAME?	#NAME?	#NAME?	#NAME?	#NAME?	#NAME?	#NAME?	#NAME?	#NAME?	#NAME?	#NAME?	#NAME?	#NAME?	#NAME?	#NAME?	#NAME?	#NAME?	#NAME?		#NAME?	#NAME?	#NAME?	#NAME?	#NAME?	#NAME?
	12		0.149622	0.120228	0.186516	0.0169102	66.4248	377.525	#NAME?	#NAME?	#NAME?	#NAME?	#NAME?	#NAME?	#NAME?	#NAME?	#NAME?	#NAME?	#NAME?	#NAME?	#NAME?	#NAME?	#NAME?	#NAME?	#NAME?	#NAME?	#NAME?	#NAME?	#NAME?	#NAME?	#NAME?	#NAME?	#NAME?		#NAME?	#NAME?	#NAME?	#NAME?	#NAME?	#NAME?
	13		0.140768	0.111764	0.177597	0.0167941	60.227	367.618	#NAME?	#NAME?	#NAME?	#NAME?	#NAME?	#NAME?	#NAME?	#NAME?	#NAME?	#NAME?	#NAME?	#NAME?	#NAME?	#NAME?	#NAME?	#NAME?	#NAME?	#NAME?	#NAME?	#NAME?	#NAME?	#NAME?	#NAME?	#NAME?	#NAME?		#NAME?	#NAME?	#NAME?	#NAME?	#NAME?	#NAME?
	14		0.132438	0.103896	0.169104	0.0166348	54.8582	359.36	#NAME?	#NAME?	#NAME?	#NAME?	#NAME?	#NAME?	#NAME?	#NAME?	#NAME?	#NAME?	#NAME?	#NAME?	#NAME?	#NAME?	#NAME?	#NAME?	#NAME?	#NAME?	#NAME?	#NAME?	#NAME?	#NAME?	#NAME?	#NAME?	#NAME?		#NAME?	#NAME?	#NAME?	#NAME?	#NAME?	#NAME?
	15		0.124601	0.0965816	0.161018	0.0164378	50.1742	352.506	#NAME?	#NAME?	#NAME?	#NAME?	#NAME?	#NAME?	#NAME?	#NAME?	#NAME?	#NAME?	#NAME?	#NAME?	#NAME?	#NAME?	#NAME?	#NAME?	#NAME?	#NAME?	#NAME?	#NAME?	#NAME?	#NAME?	#NAME?	#NAME?	#NAME?		#NAME?	#NAME?	#NAME?	#NAME?	#NAME?	#NAME?
	16		0.117227	0.0897823	0.153318	0.0162081	46.0613	346.861	#NAME?	#NAME?	#NAME?	#NAME?	#NAME?	#NAME?	#NAME?	#NAME?	#NAME?	#NAME?	#NAME?	#NAME?	#NAME?	#NAME?	#NAME?	#NAME?	#NAME?	#NAME?	#NAME?	#NAME?	#NAME?	#NAME?	#NAME?	#NAME?	#NAME?		#NAME?	#NAME?	#NAME?	#NAME?	#NAME?	#NAME?
	17		0.11029	0.0834617	0.145987	0.0159503	42.4286	342.271	#NAME?	#NAME?	#NAME?	#NAME?	#NAME?	#NAME?	#NAME?	#NAME?	#NAME?	#NAME?	#NAME?	#NAME?	#NAME?	#NAME?	#NAME?	#NAME?	#NAME?	#NAME?	#NAME?	#NAME?	#NAME?	#NAME?	#NAME?	#NAME?	#NAME?		#NAME?	#NAME?	#NAME?	#NAME?	#NAME?	#NAME?
	18		0.103764	0.0775861	0.139006	0.0156683	39.2031	338.609	#NAME?	#NAME?	#NAME?	#NAME?	#NAME?	#NAME?	#NAME?	#NAME?	#NAME?	#NAME?	#NAME?	#NAME?	#NAME?	#NAME?	#NAME?	#NAME?	#NAME?	#NAME?	#NAME?	#NAME?	#NAME?	#NAME?	#NAME?	#NAME?	#NAME?		#NAME?	#NAME?	#NAME?	#NAME?	#NAME?	#NAME?
	19		0.0976231	0.0721241	0.132359	0.015366	36.3252	335.771	#NAME?	#NAME?	#NAME?	#NAME?	#NAME?	#NAME?	#NAME?	#NAME?	#NAME?	#NAME?	#NAME?	#NAME?	#NAME?	#NAME?	#NAME?	#NAME?	#NAME?	#NAME?	#NAME?	#NAME?	#NAME?	#NAME?	#NAME?	#NAME?	#NAME?		#NAME?	#NAME?	#NAME?	#NAME?	#NAME?	#NAME?
	20		0.0918461	0.0670466	0.126029	0.0150466	33.7459	333.672	#NAME?	#NAME?	#NAME?	#NAME?	#NAME?	#NAME?	#NAME?	#NAME?	#NAME?	#NAME?	#NAME?	#NAME?	#NAME?	#NAME?	#NAME?	#NAME?	#NAME?	#NAME?	#NAME?	#NAME?	#NAME?	#NAME?	#NAME?	#NAME?	#NAME?		#NAME?	#NAME?	#NAME?	#NAME?	#NAME?	#NAME?
	21		0.086411	0.0623266	0.120003	0.0147133	31.4249	332.243	#NAME?	#NAME?	#NAME?	#NAME?	#NAME?	#NAME?	#NAME?	#NAME?	#NAME?	#NAME?	#NAME?	#NAME?	#NAME?	#NAME?	#NAME?	#NAME?	#NAME?	#NAME?	#NAME?	#NAME?	#NAME?	#NAME?	#NAME?	#NAME?	#NAME?		#NAME?	#NAME?	#NAME?	#NAME?	#NAME?	#NAME?
	22		0.0812974	0.0579388	0.114264	0.0143688	29.3283	331.424	#NAME?	#NAME?	#NAME?	#NAME?	#NAME?	#NAME?	#NAME?	#NAME?	#NAME?	#NAME?	#NAME?	#NAME?	#NAME?	#NAME?	#NAME?	#NAME?	#NAME?	#NAME?	#NAME?	#NAME?	#NAME?	#NAME?	#NAME?	#NAME?	#NAME?		#NAME?	#NAME?	#NAME?	#NAME?	#NAME?	#NAME?
	23		0.0764865	0.05386	0.1088	0.0140154	27.4278	331.169	#NAME?	#NAME?	#NAME?	#NAME?	#NAME?	#NAME?	#NAME?	#NAME?	#NAME?	#NAME?	#NAME?	#NAME?	#NAME?	#NAME?	#NAME?	#NAME?	#NAME?	#NAME?	#NAME?	#NAME?	#NAME?	#NAME?	#NAME?	#NAME?	#NAME?		#NAME?	#NAME?	#NAME?	#NAME?	#NAME?	#NAME?
	24		0.0719603	0.0500683	0.103598	0.0136555	25.6995	331.435	#NAME?	#NAME?	#NAME?	#NAME?	#NAME?	#NAME?	#NAME?	#NAME?	#NAME?	#NAME?	#NAME?	#NAME?	#NAME?	#NAME?	#NAME?	#NAME?	#NAME?	#NAME?	#NAME?	#NAME?	#NAME?	#NAME?	#NAME?	#NAME?	#NAME?		#NAME?	#NAME?	#NAME?	#NAME?	#NAME?	#NAME?
	25		0.0677019	0.0465435	0.0986438	0.0132909	24.123	332.189	#NAME?	#NAME?	#NAME?	#NAME?	#NAME?	#NAME?	#NAME?	#NAME?	#NAME?	#NAME?	#NAME?	#NAME?	#NAME?	#NAME?	#NAME?	#NAME?	#NAME?	#NAME?	#NAME?	#NAME?	#NAME?	#NAME?	#NAME?	#NAME?	#NAME?		#NAME?	#NAME?	#NAME?	#NAME?	#NAME?	#NAME?
	26		0.0636955	0.0432669	0.0939268	0.0129234	22.6809	333.402	#NAME?	#NAME?	#NAME?	#NAME?	#NAME?	#NAME?	#NAME?	#NAME?	#NAME?	#NAME?	#NAME?	#NAME?	#NAME?	#NAME?	#NAME?	#NAME?	#NAME?	#NAME?	#NAME?	#NAME?	#NAME?	#NAME?	#NAME?	#NAME?	#NAME?		#NAME?	#NAME?	#NAME?	#NAME?	#NAME?	#NAME?
	27		0.0599262	0.040221	0.0894353	0.0125547	21.3583	335.052	#NAME?	#NAME?	#NAME?	#NAME?	#NAME?	#NAME?	#NAME?	#NAME?	#NAME?	#NAME?	#NAME?	#NAME?	#NAME?	#NAME?	#NAME?	#NAME?	#NAME?	#NAME?	#NAME?	#NAME?	#NAME?	#NAME?	#NAME?	#NAME?	#NAME?		#NAME?	#NAME?	#NAME?	#NAME?	#NAME?	#NAME?
	28		0.05638	0.0373894	0.0851586	0.012186	20.1423	337.118	#NAME?	#NAME?	#NAME?	#NAME?	#NAME?	#NAME?	#NAME?	#NAME?	#NAME?	#NAME?	#NAME?	#NAME?	#NAME?	#NAME?	#NAME?	#NAME?	#NAME?	#NAME?	#NAME?	#NAME?	#NAME?	#NAME?	#NAME?	#NAME?	#NAME?		#NAME?	#NAME?	#NAME?	#NAME?	#NAME?	#NAME?
	29		0.0530436	0.0347572	0.0810864	0.0118187	19.0217	339.583	#NAME?	#NAME?	#NAME?	#NAME?	#NAME?	#NAME?	#NAME?	#NAME?	#NAME?	#NAME?	#NAME?	#NAME?	#NAME?	#NAME?	#NAME?	#NAME?	#NAME?	#NAME?	#NAME?	#NAME?	#NAME?	#NAME?	#NAME?	#NAME?	#NAME?		#NAME?	#NAME?	#NAME?	#NAME?	#NAME?	#NAME?
	30		0.0499047	0.0323104	0.077209	0.0114537	17.9867	342.435	#NAME?	#NAME?	#NAME?	#NAME?	#NAME?	#NAME?	#NAME?	#NAME?	#NAME?	#NAME?	#NAME?	#NAME?	#NAME?	#NAME?	#NAME?	#NAME?	#NAME?	#NAME?	#NAME?	#NAME?	#NAME?	#NAME?	#NAME?	#NAME?	#NAME?		#NAME?	#NAME?	#NAME?	#NAME?	#NAME?	#NAME?
	31		0.0469515	0.0300357	0.0735169	0.0110921	17.0289	345.663	#NAME?	#NAME?	#NAME?	#NAME?	#NAME?	#NAME?	#NAME?	#NAME?	#NAME?	#NAME?	#NAME?	#NAME?	#NAME?	#NAME?	#NAME?	#NAME?	#NAME?	#NAME?	#NAME?	#NAME?	#NAME?	#NAME?	#NAME?	#NAME?	#NAME?		#NAME?	#NAME?	#NAME?	#NAME?	#NAME?	#NAME?
	32		0.044173	0.0279213	0.0700014	0.0107347	16.1407	349.257	#NAME?	#NAME?	#NAME?	#NAME?	#NAME?	#NAME?	#NAME?	#NAME?	#NAME?	#NAME?	#NAME?	#NAME?	#NAME?	#NAME?	#NAME?	#NAME?	#NAME?	#NAME?	#NAME?	#NAME?	#NAME?	#NAME?	#NAME?	#NAME?	#NAME?		#NAME?	#NAME?	#NAME?	#NAME?	#NAME?	#NAME?
	33		0.041559	0.0259556	0.066654	0.0103823	15.3157	353.212	#NAME?	#NAME?	#NAME?	#NAME?	#NAME?	#NAME?	#NAME?	#NAME?	#NAME?	#NAME?	#NAME?	#NAME?	#NAME?	#NAME?	#NAME?	#NAME?	#NAME?	#NAME?	#NAME?	#NAME?	#NAME?	#NAME?	#NAME?	#NAME?	#NAME?		#NAME?	#NAME?	#NAME?	#NAME?	#NAME?	#NAME?
	34		0.0390997	0.0241284	0.0634667	0.0100353	14.5478	357.523	#NAME?	#NAME?	#NAME?	#NAME?	#NAME?	#NAME?	#NAME?	#NAME?	#NAME?	#NAME?	#NAME?	#NAME?	#NAME?	#NAME?	#NAME?	#NAME?	#NAME?	#NAME?	#NAME?	#NAME?	#NAME?	#NAME?	#NAME?	#NAME?	#NAME?		#NAME?	#NAME?	#NAME?	#NAME?	#NAME?	#NAME?
	35		0.0367859	0.0224297	0.0604318	0.00969441	13.8321	362.186	#NAME?	#NAME?	#NAME?	#NAME?	#NAME?	#NAME?	#NAME?	#NAME?	#NAME?	#NAME?	#NAME?	#NAME?	#NAME?	#NAME?	#NAME?	#NAME?	#NAME?	#NAME?	#NAME?	#NAME?	#NAME?	#NAME?	#NAME?	#NAME?	#NAME?		#NAME?	#NAME?	#NAME?	#NAME?	#NAME?	#NAME?
	36		0.034609	0.0208507	0.057542	0.00936003	13.164	367.198	#NAME?	#NAME?	#NAME?	#NAME?	#NAME?	#NAME?	#NAME?	#NAME?	#NAME?	#NAME?	#NAME?	#NAME?	#NAME?	#NAME?	#NAME?	#NAME?	#NAME?	#NAME?	#NAME?	#NAME?	#NAME?	#NAME?	#NAME?	#NAME?	#NAME?		#NAME?	#NAME?	#NAME?	#NAME?	#NAME?	#NAME?
	37		0.032561	0.0193828	0.0547904	0.00903255	12.5392	372.561	#NAME?	#NAME?	#NAME?	#NAME?	#NAME?	#NAME?	#NAME?	#NAME?	#NAME?	#NAME?	#NAME?	#NAME?	#NAME?	#NAME?	#NAME?	#NAME?	#NAME?	#NAME?	#NAME?	#NAME?	#NAME?	#NAME?	#NAME?	#NAME?	#NAME?		#NAME?	#NAME?	#NAME?	#NAME?	#NAME?	#NAME?
	38		0.0306341	0.0180183	0.0521704	0.00871228	11.9543	378.274	#NAME?	#NAME?	#NAME?	#NAME?	#NAME?	#NAME?	#NAME?	#NAME?	#NAME?	#NAME?	#NAME?	#NAME?	#NAME?	#NAME?	#NAME?	#NAME?	#NAME?	#NAME?	#NAME?	#NAME?	#NAME?	#NAME?	#NAME?	#NAME?	#NAME?		#NAME?	#NAME?	#NAME?	#NAME?	#NAME?	#NAME?
	39		0.0288213	0.0167498	0.0496757	0.00839946	11.4059	384.338	#NAME?	#NAME?	#NAME?	#NAME?	#NAME?	#NAME?	#NAME?	#NAME?	#NAME?	#NAME?	#NAME?	#NAME?	#NAME?	#NAME?	#NAME?	#NAME?	#NAME?	#NAME?	#NAME?	#NAME?	#NAME?	#NAME?	#NAME?	#NAME?	#NAME?		#NAME?	#NAME?	#NAME?	#NAME?	#NAME?	#NAME?
	40		0.0271157	0.0155707	0.0473003	0.00809429	10.891	390.757	#NAME?	#NAME?	#NAME?	#NAME?	#NAME?	#NAME?	#NAME?	#NAME?	#NAME?	#NAME?	#NAME?	#NAME?	#NAME?	#NAME?	#NAME?	#NAME?	#NAME?	#NAME?	#NAME?	#NAME?	#NAME?	#NAME?	#NAME?	#NAME?	#NAME?		#NAME?	#NAME?	#NAME?	#NAME?	#NAME?	#NAME?
	41		0.0255111	0.0144745	0.0450384	0.00779692	10.407	397.534	#NAME?	#NAME?	#NAME?	#NAME?	#NAME?	#NAME?	#NAME?	#NAME?	#NAME?	#NAME?	#NAME?	#NAME?	#NAME?	#NAME?	#NAME?	#NAME?	#NAME?	#NAME?	#NAME?	#NAME?	#NAME?	#NAME?	#NAME?	#NAME?	#NAME?		#NAME?	#NAME?	#NAME?	#NAME?	#NAME?	#NAME?
	42		0.0240015	0.0134555	0.0428847	0.00750746	9.95159	404.673	#NAME?	#NAME?	#NAME?	#NAME?	#NAME?	#NAME?	#NAME?	#NAME?	#NAME?	#NAME?	#NAME?	#NAME?	#NAME?	#NAME?	#NAME?	#NAME?	#NAME?	#NAME?	#NAME?	#NAME?	#NAME?	#NAME?	#NAME?	#NAME?	#NAME?		#NAME?	#NAME?	#NAME?	#NAME?	#NAME?	#NAME?
	43		0.0225811	0.0125082	0.040834	0.00722596	9.52251	412.18	#NAME?	#NAME?	#NAME?	#NAME?	#NAME?	#NAME?	#NAME?	#NAME?	#NAME?	#NAME?	#NAME?	#NAME?	#NAME?	#NAME?	#NAME?	#NAME?	#NAME?	#NAME?	#NAME?	#NAME?	#NAME?	#NAME?	#NAME?	#NAME?	#NAME?		#NAME?	#NAME?	#NAME?	#NAME?	#NAME?	#NAME?
	44		0.0212448	0.0116277	0.0388814	0.00695248	9.11783	420.06	#NAME?	#NAME?	#NAME?	#NAME?	#NAME?	#NAME?	#NAME?	#NAME?	#NAME?	#NAME?	#NAME?	#NAME?	#NAME?	#NAME?	#NAME?	#NAME?	#NAME?	#NAME?	#NAME?	#NAME?	#NAME?	#NAME?	#NAME?	#NAME?	#NAME?		#NAME?	#NAME?	#NAME?	#NAME?	#NAME?	#NAME?
	45		0.0199876	0.0108091	0.0370221	0.006687	8.73575	428.322	#NAME?	#NAME?	#NAME?	#NAME?	#NAME?	#NAME?	#NAME?	#NAME?	#NAME?	#NAME?	#NAME?	#NAME?	#NAME?	#NAME?	#NAME?	#NAME?	#NAME?	#NAME?	#NAME?	#NAME?	#NAME?	#NAME?	#NAME?	#NAME?	#NAME?		#NAME?	#NAME?	#NAME?	#NAME?	#NAME?	#NAME?
	46		0.0188048	0.0100481	0.0352518	0.0064295	8.37465	436.971	#NAME?	#NAME?	#NAME?	#NAME?	#NAME?	#NAME?	#NAME?	#NAME?	#NAME?	#NAME?	#NAME?	#NAME?	#NAME?	#NAME?	#NAME?	#NAME?	#NAME?	#NAME?	#NAME?	#NAME?	#NAME?	#NAME?	#NAME?	#NAME?	#NAME?		#NAME?	#NAME?	#NAME?	#NAME?	#NAME?	#NAME?
	47		0.017692	0.00934076	0.0335661	0.00617992	8.03307	446.017	#NAME?	#NAME?	#NAME?	#NAME?	#NAME?	#NAME?	#NAME?	#NAME?	#NAME?	#NAME?	#NAME?	#NAME?	#NAME?	#NAME?	#NAME?	#NAME?	#NAME?	#NAME?	#NAME?	#NAME?	#NAME?	#NAME?	#NAME?	#NAME?	#NAME?		#NAME?	#NAME?	#NAME?	#NAME?	#NAME?	#NAME?
	48		0.0166451	0.00868318	0.031961	0.00593821	7.70963	455.468	#NAME?	#NAME?	#NAME?	#NAME?	#NAME?	#NAME?	#NAME?	#NAME?	#NAME?	#NAME?	#NAME?	#NAME?	#NAME?	#NAME?	#NAME?	#NAME?	#NAME?	#NAME?	#NAME?	#NAME?	#NAME?	#NAME?	#NAME?	#NAME?	#NAME?		#NAME?	#NAME?	#NAME?	#NAME?	#NAME?	#NAME?
	49		0.0156601	0.00807189	0.0304326	0.00570427	7.40312	465.335	#NAME?	#NAME?	#NAME?	#NAME?	#NAME?	#NAME?	#NAME?	#NAME?	#NAME?	#NAME?	#NAME?	#NAME?	#NAME?	#NAME?	#NAME?	#NAME?	#NAME?	#NAME?	#NAME?	#NAME?	#NAME?	#NAME?	#NAME?	#NAME?	#NAME?		#NAME?	#NAME?	#NAME?	#NAME?	#NAME?	#NAME?
	50		0.0147334	0.00750364	0.0289774	0.005478	7.11238	475.628	#NAME?	#NAME?	#NAME?	#NAME?	#NAME?	#NAME?	#NAME?	#NAME?	#NAME?	#NAME?	#NAME?	#NAME?	#NAME?	#NAME?	#NAME?	#NAME?	#NAME?	#NAME?	#NAME?	#NAME?	#NAME?	#NAME?	#NAME?	#NAME?	#NAME?		#NAME?	#NAME?	#NAME?	#NAME?	#NAME?	#NAME?
	51		0.0138615	0.00697539	0.0275917	0.00525927	6.8364	486.357	#NAME?	#NAME?	#NAME?	#NAME?	#NAME?	#NAME?	#NAME?	#NAME?	#NAME?	#NAME?	#NAME?	#NAME?	#NAME?	#NAME?	#NAME?	#NAME?	#NAME?	#NAME?	#NAME?	#NAME?	#NAME?	#NAME?	#NAME?	#NAME?	#NAME?		#NAME?	#NAME?	#NAME?	#NAME?	#NAME?	#NAME?
	52		0.0130412	0.00648433	0.0262723	0.00504796	6.5742	497.536	#NAME?	#NAME?	#NAME?	#NAME?	#NAME?	#NAME?	#NAME?	#NAME?	#NAME?	#NAME?	#NAME?	#NAME?	#NAME?	#NAME?	#NAME?	#NAME?	#NAME?	#NAME?	#NAME?	#NAME?	#NAME?	#NAME?	#NAME?	#NAME?	#NAME?		#NAME?	#NAME?	#NAME?	#NAME?	#NAME?	#NAME?
	53		0.0122695	0.00602784	0.025016	0.00484392	6.32492	509.175	#NAME?	#NAME?	#NAME?	#NAME?	#NAME?	#NAME?	#NAME?	#NAME?	#NAME?	#NAME?	#NAME?	#NAME?	#NAME?	#NAME?	#NAME?	#NAME?	#NAME?	#NAME?	#NAME?	#NAME?	#NAME?	#NAME?	#NAME?	#NAME?	#NAME?		#NAME?	#NAME?	#NAME?	#NAME?	#NAME?	#NAME?
	54		0.0115434	0.00560348	0.0238198	0.00464701	6.08773	521.29	#NAME?	#NAME?	#NAME?	#NAME?	#NAME?	#NAME?	#NAME?	#NAME?	#NAME?	#NAME?	#NAME?	#NAME?	#NAME?	#NAME?	#NAME?	#NAME?	#NAME?	#NAME?	#NAME?	#NAME?	#NAME?	#NAME?	#NAME?	#NAME?	#NAME?		#NAME?	#NAME?	#NAME?	#NAME?	#NAME?	#NAME?
	55		0.0108603	0.005209	0.0226807	0.00445707	5.8619	533.892	#NAME?	#NAME?	#NAME?	#NAME?	#NAME?	#NAME?	#NAME?	#NAME?	#NAME?	#NAME?	#NAME?	#NAME?	#NAME?	#NAME?	#NAME?	#NAME?	#NAME?	#NAME?	#NAME?	#NAME?	#NAME?	#NAME?	#NAME?	#NAME?	#NAME?		#NAME?	#NAME?	#NAME?	#NAME?	#NAME?	#NAME?
	56		0.0102176	0.00484229	0.0215962	0.00427395	5.64672	546.998	#NAME?	#NAME?	#NAME?	#NAME?	#NAME?	#NAME?	#NAME?	#NAME?	#NAME?	#NAME?	#NAME?	#NAME?	#NAME?	#NAME?	#NAME?	#NAME?	#NAME?	#NAME?	#NAME?	#NAME?	#NAME?	#NAME?	#NAME?	#NAME?	#NAME?		#NAME?	#NAME?	#NAME?	#NAME?	#NAME?	#NAME?
	57		0.00961298	0.0045014	0.0205635	0.00409746	5.44157	560.623	#NAME?	#NAME?	#NAME?	#NAME?	#NAME?	#NAME?	#NAME?	#NAME?	#NAME?	#NAME?	#NAME?	#NAME?	#NAME?	#NAME?	#NAME?	#NAME?	#NAME?	#NAME?	#NAME?	#NAME?	#NAME?	#NAME?	#NAME?	#NAME?	#NAME?		#NAME?	#NAME?	#NAME?	#NAME?	#NAME?	#NAME?
	58		0.00904412	0.0041845	0.0195801	0.00392746	5.24584	574.783	#NAME?	#NAME?	#NAME?	#NAME?	#NAME?	#NAME?	#NAME?	#NAME?	#NAME?	#NAME?	#NAME?	#NAME?	#NAME?	#NAME?	#NAME?	#NAME?	#NAME?	#NAME?	#NAME?	#NAME?	#NAME?	#NAME?	#NAME?	#NAME?	#NAME?		#NAME?	#NAME?	#NAME?	#NAME?	#NAME?	#NAME?
	59		0.00850891	0.00388992	0.0186438	0.00376376	5.059	589.494	#NAME?	#NAME?	#NAME?	#NAME?	#NAME?	#NAME?	#NAME?	#NAME?	#NAME?	#NAME?	#NAME?	#NAME?	#NAME?	#NAME?	#NAME?	#NAME?	#NAME?	#NAME?	#NAME?	#NAME?	#NAME?	#NAME?	#NAME?	#NAME?	#NAME?		#NAME?	#NAME?	#NAME?	#NAME?	#NAME?	#NAME?
	60		0.00800538	0.00361607	0.0177523	0.00360618	4.88052	604.774	#NAME?	#NAME?	#NAME?	#NAME?	#NAME?	#NAME?	#NAME?	#NAME?	#NAME?	#NAME?	#NAME?	#NAME?	#NAME?	#NAME?	#NAME?	#NAME?	#NAME?	#NAME?	#NAME?	#NAME?	#NAME?	#NAME?	#NAME?	#NAME?	#NAME?		#NAME?	#NAME?	#NAME?	#NAME?	#NAME?	#NAME?
	61		0.00753165	0.0033615	0.0169034	0.00345457	4.70994	620.643	#NAME?	#NAME?	#NAME?	#NAME?	#NAME?	#NAME?	#NAME?	#NAME?	#NAME?	#NAME?	#NAME?	#NAME?	#NAME?	#NAME?	#NAME?	#NAME?	#NAME?	#NAME?	#NAME?	#NAME?	#NAME?	#NAME?	#NAME?	#NAME?	#NAME?		#NAME?	#NAME?	#NAME?	#NAME?	#NAME?	#NAME?
	62		0.00708595	0.00312486	0.0160951	0.00330874	4.54681	637.118	#NAME?	#NAME?	#NAME?	#NAME?	#NAME?	#NAME?	#NAME?	#NAME?	#NAME?	#NAME?	#NAME?	#NAME?	#NAME?	#NAME?	#NAME?	#NAME?	#NAME?	#NAME?	#NAME?	#NAME?	#NAME?	#NAME?	#NAME?	#NAME?	#NAME?		#NAME?	#NAME?	#NAME?	#NAME?	#NAME?	#NAME?
	63		0.00666663	0.00290487	0.0153255	0.00316852	4.39072	654.221	#NAME?	#NAME?	#NAME?	#NAME?	#NAME?	#NAME?	#NAME?	#NAME?	#NAME?	#NAME?	#NAME?	#NAME?	#NAME?	#NAME?	#NAME?	#NAME?	#NAME?	#NAME?	#NAME?	#NAME?	#NAME?	#NAME?	#NAME?	#NAME?	#NAME?		#NAME?	#NAME?	#NAME?	#NAME?	#NAME?	#NAME?
	64		0.00627212	0.00270037	0.0145926	0.00303374	4.2413	671.973	#NAME?	#NAME?	#NAME?	#NAME?	#NAME?	#NAME?	#NAME?	#NAME?	#NAME?	#NAME?	#NAME?	#NAME?	#NAME?	#NAME?	#NAME?	#NAME?	#NAME?	#NAME?	#NAME?	#NAME?	#NAME?	#NAME?	#NAME?	#NAME?	#NAME?		#NAME?	#NAME?	#NAME?	#NAME?	#NAME?	#NAME?
	65		0.00590096	0.00251026	0.0138948	0.00290422	4.09817	690.394	#NAME?	#NAME?	#NAME?	#NAME?	#NAME?	#NAME?	#NAME?	#NAME?	#NAME?	#NAME?	#NAME?	#NAME?	#NAME?	#NAME?	#NAME?	#NAME?	#NAME?	#NAME?	#NAME?	#NAME?	#NAME?	#NAME?	#NAME?	#NAME?	#NAME?		#NAME?	#NAME?	#NAME?	#NAME?	#NAME?	#NAME?
	66		0.00555176	0.00233354	0.0132304	0.00277981	3.96101	709.509	#NAME?	#NAME?	#NAME?	#NAME?	#NAME?	#NAME?	#NAME?	#NAME?	#NAME?	#NAME?	#NAME?	#NAME?	#NAME?	#NAME?	#NAME?	#NAME?	#NAME?	#NAME?	#NAME?	#NAME?	#NAME?	#NAME?	#NAME?	#NAME?	#NAME?		#NAME?	#NAME?	#NAME?	#NAME?	#NAME?	#NAME?
	67		0.00522322	0.00216926	0.0125977	0.00266032	3.82951	729.34	#NAME?	#NAME?	#NAME?	#NAME?	#NAME?	#NAME?	#NAME?	#NAME?	#NAME?	#NAME?	#NAME?	#NAME?	#NAME?	#NAME?	#NAME?	#NAME?	#NAME?	#NAME?	#NAME?	#NAME?	#NAME?	#NAME?	#NAME?	#NAME?	#NAME?		#NAME?	#NAME?	#NAME?	#NAME?	#NAME?	#NAME?
	68		0.00491413	0.00201655	0.0119953	0.0025456	3.70337	749.913	#NAME?	#NAME?	#NAME?	#NAME?	#NAME?	#NAME?	#NAME?	#NAME?	#NAME?	#NAME?	#NAME?	#NAME?	#NAME?	#NAME?	#NAME?	#NAME?	#NAME?	#NAME?	#NAME?	#NAME?	#NAME?	#NAME?	#NAME?	#NAME?	#NAME?		#NAME?	#NAME?	#NAME?	#NAME?	#NAME?	#NAME?
	69		0.00462333	0.00187459	0.0114217	0.00243549	3.58231	771.252	#NAME?	#NAME?	#NAME?	#NAME?	#NAME?	#NAME?	#NAME?	#NAME?	#NAME?	#NAME?	#NAME?	#NAME?	#NAME?	#NAME?	#NAME?	#NAME?	#NAME?	#NAME?	#NAME?	#NAME?	#NAME?	#NAME?	#NAME?	#NAME?	#NAME?		#NAME?	#NAME?	#NAME?	#NAME?	#NAME?	#NAME?
	70		0.00434973	0.00174262	0.0108755	0.00232983	3.46609	793.386	#NAME?	#NAME?	#NAME?	#NAME?	#NAME?	#NAME?	#NAME?	#NAME?	#NAME?	#NAME?	#NAME?	#NAME?	#NAME?	#NAME?	#NAME?	#NAME?	#NAME?	#NAME?	#NAME?	#NAME?	#NAME?	#NAME?	#NAME?	#NAME?	#NAME?		#NAME?	#NAME?	#NAME?	#NAME?	#NAME?	#NAME?
	71		0.00409233	0.00161994	0.0103555	0.00222845	3.35447	816.341	#NAME?	#NAME?	#NAME?	#NAME?	#NAME?	#NAME?	#NAME?	#NAME?	#NAME?	#NAME?	#NAME?	#NAME?	#NAME?	#NAME?	#NAME?	#NAME?	#NAME?	#NAME?	#NAME?	#NAME?	#NAME?	#NAME?	#NAME?	#NAME?	#NAME?		#NAME?	#NAME?	#NAME?	#NAME?	#NAME?	#NAME?
	72		0.00385016	0.0015059	0.00986029	0.00213122	3.2472	840.147	#NAME?	#NAME?	#NAME?	#NAME?	#NAME?	#NAME?	#NAME?	#NAME?	#NAME?	#NAME?	#NAME?	#NAME?	#NAME?	#NAME?	#NAME?	#NAME?	#NAME?	#NAME?	#NAME?	#NAME?	#NAME?	#NAME?	#NAME?	#NAME?	#NAME?		#NAME?	#NAME?	#NAME?	#NAME?	#NAME?	#NAME?
	73		0.00362232	0.00139988	0.00938878	0.00203799	3.14409	864.834	#NAME?	#NAME?	#NAME?	#NAME?	#NAME?	#NAME?	#NAME?	#NAME?	#NAME?	#NAME?	#NAME?	#NAME?	#NAME?	#NAME?	#NAME?	#NAME?	#NAME?	#NAME?	#NAME?	#NAME?	#NAME?	#NAME?	#NAME?	#NAME?	#NAME?		#NAME?	#NAME?	#NAME?	#NAME?	#NAME?	#NAME?
	74		0.00340796	0.00130133	0.00893982	0.00194859	3.04494	890.432	#NAME?	#NAME?	#NAME?	#NAME?	#NAME?	#NAME?	#NAME?	#NAME?	#NAME?	#NAME?	#NAME?	#NAME?	#NAME?	#NAME?	#NAME?	#NAME?	#NAME?	#NAME?	#NAME?	#NAME?	#NAME?	#NAME?	#NAME?	#NAME?	#NAME?		#NAME?	#NAME?	#NAME?	#NAME?	#NAME?	#NAME?
	75		0.00320629	0.00120972	0.00851233	0.00186291	2.94954	916.974	#NAME?	#NAME?	#NAME?	#NAME?	#NAME?	#NAME?	#NAME?	#NAME?	#NAME?	#NAME?	#NAME?	#NAME?	#NAME?	#NAME?	#NAME?	#NAME?	#NAME?	#NAME?	#NAME?	#NAME?	#NAME?	#NAME?	#NAME?	#NAME?	#NAME?		#NAME?	#NAME?	#NAME?	#NAME?	#NAME?	#NAME?
	76		0.00301655	0.00112456	0.00810528	0.0017808	2.85774	944.495	#NAME?	#NAME?	#NAME?	#NAME?	#NAME?	#NAME?	#NAME?	#NAME?	#NAME?	#NAME?	#NAME?	#NAME?	#NAME?	#NAME?	#NAME?	#NAME?	#NAME?	#NAME?	#NAME?	#NAME?	#NAME?	#NAME?	#NAME?	#NAME?	#NAME?		#NAME?	#NAME?	#NAME?	#NAME?	#NAME?	#NAME?
	77		0.00283804	0.00104539	0.0077177	0.00170212	2.76935	973.028	#NAME?	#NAME?	#NAME?	#NAME?	#NAME?	#NAME?	#NAME?	#NAME?	#NAME?	#NAME?	#NAME?	#NAME?	#NAME?	#NAME?	#NAME?	#NAME?	#NAME?	#NAME?	#NAME?	#NAME?	#NAME?	#NAME?	#NAME?	#NAME?	#NAME?		#NAME?	#NAME?	#NAME?	#NAME?	#NAME?	#NAME?
	78		0.0026701	0.000971794	0.00734864	0.00162675	2.68423	1002.61	#NAME?	#NAME?	#NAME?	#NAME?	#NAME?	#NAME?	#NAME?	#NAME?	#NAME?	#NAME?	#NAME?	#NAME?	#NAME?	#NAME?	#NAME?	#NAME?	#NAME?	#NAME?	#NAME?	#NAME?	#NAME?	#NAME?	#NAME?	#NAME?	#NAME?		#NAME?	#NAME?	#NAME?	#NAME?	#NAME?	#NAME?
	79		0.00251209	0.00090338	0.00699724	0.00155456	2.60223	1033.28	#NAME?	#NAME?	#NAME?	#NAME?	#NAME?	#NAME?	#NAME?	#NAME?	#NAME?	#NAME?	#NAME?	#NAME?	#NAME?	#NAME?	#NAME?	#NAME?	#NAME?	#NAME?	#NAME?	#NAME?	#NAME?	#NAME?	#NAME?	#NAME?	#NAME?		#NAME?	#NAME?	#NAME?	#NAME?	#NAME?	#NAME?
	80		0.00236343	0.000839783	0.00666264	0.00148542	2.5232	1065.08	#NAME?	#NAME?	#NAME?	#NAME?	#NAME?	#NAME?	#NAME?	#NAME?	#NAME?	#NAME?	#NAME?	#NAME?	#NAME?	#NAME?	#NAME?	#NAME?	#NAME?	#NAME?	#NAME?	#NAME?	#NAME?	#NAME?	#NAME?	#NAME?	#NAME?		#NAME?	#NAME?	#NAME?	#NAME?	#NAME?	#NAME?
	81		0.00222357	0.000780663	0.00634404	0.00141923	2.44701	1098.04	#NAME?	#NAME?	#NAME?	#NAME?	#NAME?	#NAME?	#NAME?	#NAME?	#NAME?	#NAME?	#NAME?	#NAME?	#NAME?	#NAME?	#NAME?	#NAME?	#NAME?	#NAME?	#NAME?	#NAME?	#NAME?	#NAME?	#NAME?	#NAME?	#NAME?		#NAME?	#NAME?	#NAME?	#NAME?	#NAME?	#NAME?
	82		0.00209199	0.000725705	0.00604067	0.00135586	2.37354	1132.21	#NAME?	#NAME?	#NAME?	#NAME?	#NAME?	#NAME?	#NAME?	#NAME?	#NAME?	#NAME?	#NAME?	#NAME?	#NAME?	#NAME?	#NAME?	#NAME?	#NAME?	#NAME?	#NAME?	#NAME?	#NAME?	#NAME?	#NAME?	#NAME?	#NAME?		#NAME?	#NAME?	#NAME?	#NAME?	#NAME?	#NAME?
	83		0.00196819	0.000674616	0.00575182	0.0012952	2.30267	1167.64	#NAME?	#NAME?	#NAME?	#NAME?	#NAME?	#NAME?	#NAME?	#NAME?	#NAME?	#NAME?	#NAME?	#NAME?	#NAME?	#NAME?	#NAME?	#NAME?	#NAME?	#NAME?	#NAME?	#NAME?	#NAME?	#NAME?	#NAME?	#NAME?	#NAME?		#NAME?	#NAME?	#NAME?	#NAME?	#NAME?	#NAME?
	84		0.00185172	0.000627123	0.00547677	0.00123716	2.23428	1204.36	#NAME?	#NAME?	#NAME?	#NAME?	#NAME?	#NAME?	#NAME?	#NAME?	#NAME?	#NAME?	#NAME?	#NAME?	#NAME?	#NAME?	#NAME?	#NAME?	#NAME?	#NAME?	#NAME?	#NAME?	#NAME?	#NAME?	#NAME?	#NAME?	#NAME?		#NAME?	#NAME?	#NAME?	#NAME?	#NAME?	#NAME?
	85		0.00174214	0.000582974	0.00521488	0.00118161	2.16827	1242.43	#NAME?	#NAME?	#NAME?	#NAME?	#NAME?	#NAME?	#NAME?	#NAME?	#NAME?	#NAME?	#NAME?	#NAME?	#NAME?	#NAME?	#NAME?	#NAME?	#NAME?	#NAME?	#NAME?	#NAME?	#NAME?	#NAME?	#NAME?	#NAME?	#NAME?		#NAME?	#NAME?	#NAME?	#NAME?	#NAME?	#NAME?
	86		0.00163905	0.000541934	0.00496551	0.00112846	2.10454	1281.9	#NAME?	#NAME?	#NAME?	#NAME?	#NAME?	#NAME?	#NAME?	#NAME?	#NAME?	#NAME?	#NAME?	#NAME?	#NAME?	#NAME?	#NAME?	#NAME?	#NAME?	#NAME?	#NAME?	#NAME?	#NAME?	#NAME?	#NAME?	#NAME?	#NAME?		#NAME?	#NAME?	#NAME?	#NAME?	#NAME?	#NAME?
	87		0.00154205	0.000503782	0.00472806	0.00107762	2.04299	1322.81	#NAME?	#NAME?	#NAME?	#NAME?	#NAME?	#NAME?	#NAME?	#NAME?	#NAME?	#NAME?	#NAME?	#NAME?	#NAME?	#NAME?	#NAME?	#NAME?	#NAME?	#NAME?	#NAME?	#NAME?	#NAME?	#NAME?	#NAME?	#NAME?	#NAME?		#NAME?	#NAME?	#NAME?	#NAME?	#NAME?	#NAME?
	88		0.0014508	0.000468316	0.00450197	0.00102899	1.98354	1365.22	#NAME?	#NAME?	#NAME?	#NAME?	#NAME?	#NAME?	#NAME?	#NAME?	#NAME?	#NAME?	#NAME?	#NAME?	#NAME?	#NAME?	#NAME?	#NAME?	#NAME?	#NAME?	#NAME?	#NAME?	#NAME?	#NAME?	#NAME?	#NAME?	#NAME?		#NAME?	#NAME?	#NAME?	#NAME?	#NAME?	#NAME?
	89		0.00136495	0.000435347	0.00428669	0.000982486	1.92609	1409.19	#NAME?	#NAME?	#NAME?	#NAME?	#NAME?	#NAME?	#NAME?	#NAME?	#NAME?	#NAME?	#NAME?	#NAME?	#NAME?	#NAME?	#NAME?	#NAME?	#NAME?	#NAME?	#NAME?	#NAME?	#NAME?	#NAME?	#NAME?	#NAME?	#NAME?		#NAME?	#NAME?	#NAME?	#NAME?	#NAME?	#NAME?
	90		0.00128417	0.000404699	0.00408171	0.000938013	1.87057	1454.76	#NAME?	#NAME?	#NAME?	#NAME?	#NAME?	#NAME?	#NAME?	#NAME?	#NAME?	#NAME?	#NAME?	#NAME?	#NAME?	#NAME?	#NAME?	#NAME?	#NAME?	#NAME?	#NAME?	#NAME?	#NAME?	#NAME?	#NAME?	#NAME?	#NAME?		#NAME?	#NAME?	#NAME?	#NAME?	#NAME?	#NAME?
	91		0.00120818	0.000376208	0.00388653	0.000895489	1.81689	1502.01	#NAME?	#NAME?	#NAME?	#NAME?	#NAME?	#NAME?	#NAME?	#NAME?	#NAME?	#NAME?	#NAME?	#NAME?	#NAME?	#NAME?	#NAME?	#NAME?	#NAME?	#NAME?	#NAME?	#NAME?	#NAME?	#NAME?	#NAME?	#NAME?	#NAME?		#NAME?	#NAME?	#NAME?	#NAME?	#NAME?	#NAME?
	92		0.00113668	0.000349724	0.00370068	0.000854835	1.76498	1550.98	#NAME?	#NAME?	#NAME?	#NAME?	#NAME?	#NAME?	#NAME?	#NAME?	#NAME?	#NAME?	#NAME?	#NAME?	#NAME?	#NAME?	#NAME?	#NAME?	#NAME?	#NAME?	#NAME?	#NAME?	#NAME?	#NAME?	#NAME?	#NAME?	#NAME?		#NAME?	#NAME?	#NAME?	#NAME?	#NAME?	#NAME?
	93		0.00106942	0.000325103	0.00352371	0.000815972	1.71478	1601.76	#NAME?	#NAME?	#NAME?	#NAME?	#NAME?	#NAME?	#NAME?	#NAME?	#NAME?	#NAME?	#NAME?	#NAME?	#NAME?	#NAME?	#NAME?	#NAME?	#NAME?	#NAME?	#NAME?	#NAME?	#NAME?	#NAME?	#NAME?	#NAME?	#NAME?		#NAME?	#NAME?	#NAME?	#NAME?	#NAME?	#NAME?
	94		0.00100613	0.000302216	0.00335521	0.000778826	1.66621	1654.39	#NAME?	#NAME?	#NAME?	#NAME?	#NAME?	#NAME?	#NAME?	#NAME?	#NAME?	#NAME?	#NAME?	#NAME?	#NAME?	#NAME?	#NAME?	#NAME?	#NAME?	#NAME?	#NAME?	#NAME?	#NAME?	#NAME?	#NAME?	#NAME?	#NAME?		#NAME?	#NAME?	#NAME?	#NAME?	#NAME?	#NAME?
	95		0.000946593	0.000280941	0.00319477	0.000743324	1.61922	1708.95	#NAME?	#NAME?	#NAME?	#NAME?	#NAME?	#NAME?	#NAME?	#NAME?	#NAME?	#NAME?	#NAME?	#NAME?	#NAME?	#NAME?	#NAME?	#NAME?	#NAME?	#NAME?	#NAME?	#NAME?	#NAME?	#NAME?	#NAME?	#NAME?	#NAME?		#NAME?	#NAME?	#NAME?	#NAME?	#NAME?	#NAME?
	96		0.000890577	0.000261163	0.003042	0.000709398	1.57373	1765.52	#NAME?	#NAME?	#NAME?	#NAME?	#NAME?	#NAME?	#NAME?	#NAME?	#NAME?	#NAME?	#NAME?	#NAME?	#NAME?	#NAME?	#NAME?	#NAME?	#NAME?	#NAME?	#NAME?	#NAME?	#NAME?	#NAME?	#NAME?	#NAME?	#NAME?		#NAME?	#NAME?	#NAME?	#NAME?	#NAME?	#NAME?
	97		0.000837876	0.000242777	0.00289654	0.000676979	1.5297	1824.16	#NAME?	#NAME?	#NAME?	#NAME?	#NAME?	#NAME?	#NAME?	#NAME?	#NAME?	#NAME?	#NAME?	#NAME?	#NAME?	#NAME?	#NAME?	#NAME?	#NAME?	#NAME?	#NAME?	#NAME?	#NAME?	#NAME?	#NAME?	#NAME?	#NAME?		#NAME?	#NAME?	#NAME?	#NAME?	#NAME?	#NAME?
	98		0.000788293	0.000225686	0.00275803	0.000646006	1.48707	1884.95	#NAME?	#NAME?	#NAME?	#NAME?	#NAME?	#NAME?	#NAME?	#NAME?	#NAME?	#NAME?	#NAME?	#NAME?	#NAME?	#NAME?	#NAME?	#NAME?	#NAME?	#NAME?	#NAME?	#NAME?	#NAME?	#NAME?	#NAME?	#NAME?	#NAME?		#NAME?	#NAME?	#NAME?	#NAME?	#NAME?	#NAME?
	99		0.000741644	0.000209798	0.00262614	0.000616414	1.44578	1947.97	#NAME?	#NAME?	#NAME?	#NAME?	#NAME?	#NAME?	#NAME?	#NAME?	#NAME?	#NAME?	#NAME?	#NAME?	#NAME?	#NAME?	#NAME?	#NAME?	#NAME?	#NAME?	#NAME?	#NAME?	#NAME?	#NAME?	#NAME?	#NAME?	#NAME?		#NAME?	#NAME?	#NAME?	#NAME?	#NAME?	#NAME?
	100		0.000697756	0.000195028	0.00250056	0.000588147	1.40578	2013.31	#NAME?	#NAME?	#NAME?	#NAME?	#NAME?	#NAME?	#NAME?	#NAME?	#NAME?	#NAME?	#NAME?	#NAME?	#NAME?	#NAME?	#NAME?	#NAME?	#NAME?	#NAME?	#NAME?	#NAME?	#NAME?	#NAME?	#NAME?	#NAME?	#NAME?		#NAME?	#NAME?	#NAME?	#NAME?	#NAME?	#NAME?
	101		0.000656465	0.000181298	0.00238099	0.000561145	1.36703	2081.05	#NAME?	#NAME?	#NAME?	#NAME?	#NAME?	#NAME?	#NAME?	#NAME?	#NAME?	#NAME?	#NAME?	#NAME?	#NAME?	#NAME?	#NAME?	#NAME?	#NAME?	#NAME?	#NAME?	#NAME?	#NAME?	#NAME?	#NAME?	#NAME?	#NAME?		#NAME?	#NAME?	#NAME?	#NAME?	#NAME?	#NAME?
	102		0.000617618	0.000168535	0.00226713	0.000535356	1.32948	2151.27	#NAME?	#NAME?	#NAME?	#NAME?	#NAME?	#NAME?	#NAME?	#NAME?	#NAME?	#NAME?	#NAME?	#NAME?	#NAME?	#NAME?	#NAME?	#NAME?	#NAME?	#NAME?	#NAME?	#NAME?	#NAME?	#NAME?	#NAME?	#NAME?	#NAME?		#NAME?	#NAME?	#NAME?	#NAME?	#NAME?	#NAME?
	103		0.000581069	0.00015667	0.00215872	0.000510727	1.29309	2224.08	#NAME?	#NAME?	#NAME?	#NAME?	#NAME?	#NAME?	#NAME?	#NAME?	#NAME?	#NAME?	#NAME?	#NAME?	#NAME?	#NAME?	#NAME?	#NAME?	#NAME?	#NAME?	#NAME?	#NAME?	#NAME?	#NAME?	#NAME?	#NAME?	#NAME?		#NAME?	#NAME?	#NAME?	#NAME?	#NAME?	#NAME?
	104		0.000546683	0.000145641	0.00205549	0.000487207	1.25782	2299.56	#NAME?	#NAME?			0	#NAME?			0	#NAME?			0	#NAME?			0	#NAME?			0	#NAME?			0		#NAME?	#NAME?	#NAME?	#NAME?	#NAME?	#NAME?
	YLD										#NAME?	#NAME?	#NAME?		#NAME?	#NAME?	#NAME?		#NAME?	#NAME?	#NAME?		#NAME?	#NAME?	#NAME?		#NAME?	#NAME?	#NAME?		#NAME?	#NAME?	#NAME?
PICS
			SCENARIO IA												SCENARIO IB												SCENARIO IC
			Scenario IA_V (Vaccinated)						Scenario IA_U (Unvaccinated)						Scenario IB (Vaccinated)						Scenario IB_U (Unvaccinated)						Scenario IC (Vaccinated)						Scenario IC_U (Unvaccinated)
			COVID INCIDENCE	PICS INCIDENCE	LE tables (Yrs)	Duration (days)	Incidence-per year	DALYS	COVID INCIDENCE	PICS INCIDENCE	LE tables (Yrs)	Duration (days)	Incidence-per year	DALYS	COVID INCIDENCE	PICS INCIDENCE	LE tables (Yrs)	Duration (days)	Incidence-per year	DALYS	COVID INCIDENCE	PICS INCIDENCE	LE tables (Yrs)	Duration (days)	Incidence-per year	DALYS	COVID INCIDENCE	PICS INCIDENCE	LE tables (Yrs)	Duration (days)	Incidence-per year	DALYS	COVID INCIDENCE	PICS INCIDENCE	LE tables (Yrs)	Duration (days)	Incidence-per year	DALYS
	60-69		282.313	255.776	21.403	7803.43	5464.55	#NAME?	310.739	281.529	21.403	7803.43	6014.77	#NAME?	4.61613	4.18222	21.403	7803.43	89.3515	#NAME?	5.10204	4.62245	21.403	7803.43	98.7569	#NAME?	1.94364	1.76093	21.403	7803.43	37.6217	#NAME?	2.18659	1.98105	21.403	7803.43	42.3244	#NAME?
	70-79		129.252	117.102	13.4485	4898.07	1570.36	#NAME?	142.266	128.893	13.4485	4898.07	1728.48	#NAME?	2.11341	1.91475	13.4485	4898.07	25.6771	#NAME?	2.33587	2.1163	13.4485	4898.07	28.38	#NAME?	0.889857	0.80621	13.4485	4898.07	10.8114	#NAME?	1.00109	0.906987	13.4485	4898.07	12.1628	#NAME?
	80-89		30.6123	27.7347	7.10454	2580.93	195.979	#NAME?	33.6946	30.5273	7.10454	2580.93	215.712	#NAME?	0.500545	0.453493	7.10454	2580.93	3.20448	#NAME?	0.553233	0.50123	7.10454	2580.93	3.54179	#NAME?	0.210756	0.190945	7.10454	2580.93	1.34925	#NAME?	0.2371	0.214813	7.10454	2580.93	1.51791	#NAME?
	90+		0	0	3.45069	1246.36	0	#NAME?	0	0	3.45069	1246.36	0	#NAME?	0	0	3.45069	1246.36	0	#NAME?	0	0	3.45069	1246.36	0	#NAME?	0	0	3.45069	1246.36	0	#NAME?	0	0	3.45069	1246.36	0	#NAME?
	TOTAL		442.177	400.612			7230.89	#NAME?	486.699	440.949			7958.96	#NAME?	7.23009	6.55046			118.233	#NAME?	7.99115	7.23998			130.679	#NAME?	3.04425	2.75809			49.7824	#NAME?	3.42478	3.10285			56.0052	#NAME?
Permanent
					SCENARIO IA				SCENARIO IB				SCENARIO IC
					Scenario IA (Vaccinated)		Scenario IA (UNVaccinated)		Scenario IB (Vaccinated)		Scenario IB (UNVaccinated)		Scenario IC (Vaccinated)		Scenario IC (UNVaccinated)
			IHME 2019		COVID-19 consequences		COVID-19 consequences		COVID-19 consequences		COVID-19 consequences		COVID-19 consequences		COVID-19 consequences
					Base		Base		Base		Base		Base		Base
			Incidence Base	DALYS Base	Incidence	DALYS	Incidence	DALYS	Incidence	DALYS	Incidence	DALYS	Incidence	DALYS	Incidence	DALYS
1	Diabetes	587	69042.8	186528	#NAME?	#NAME?	#NAME?	#NAME?	#NAME?	#NAME?	#NAME?	#NAME?	#NAME?	#NAME?	#NAME?	#NAME?
2	Parkinsons	544	6598.01	38742.5	#NAME?	#NAME?	#NAME?	#NAME?	#NAME?	#NAME?	#NAME?	#NAME?	#NAME?	#NAME?	#NAME?	#NAME?
3	Dementia	543	43968.6	154293	#NAME?	#NAME?	#NAME?	#NAME?	#NAME?	#NAME?	#NAME?	#NAME?	#NAME?	#NAME?	#NAME?	#NAME?
4	Anxiety disorders	571	188750	139108	#NAME?	#NAME?	#NAME?	#NAME?	#NAME?	#NAME?	#NAME?	#NAME?	#NAME?	#NAME?	#NAME?	#NAME?
5	Ischemic Stroke	495	17984.1	114238	#NAME?	#NAME?	#NAME?	#NAME?	#NAME?	#NAME?	#NAME?	#NAME?	#NAME?	#NAME?	#NAME?	#NAME?
	Total with Diabetes					#NAME?		#NAME?		#NAME?		#NAME?		#NAME?		#NAME?
	Total without Diabetes					#NAME?		#NAME?		#NAME?		#NAME?		#NAME?		#NAME?
DALYS
			Scenario IA_V (Vaccinated)							Scenario IA_U (Unvaccinated)							Scenario IB_V (Vaccinated)							Scenario IB_U (Unvaccinated)							Scenario IC_V (Vaccinated)							Scenario IC_U (Unvaccinated)
			TOTAL DALYS				ERRUNOUTPUT			TOTAL DALYS				ERRUNOUTPUT			TOTAL DALYS				ERRUNOUTPUT			TOTAL DALYS				ERRUNOUTPUT			TOTAL DALYS				ERRUNOUTPUT			TOTAL DALYS				ERRUNOUTPUT
			YLL	YLD (Base)	DALYS	DALYS per 100,000 population				YLL	YLD (Base)	DALYS	DALYS per 100,000 population				YLL	YLD (Base)	DALYS	DALYS per 100,000 population				YLL	YLD (Base)	DALYS	DALYS per 100,000 population				YLL	YLD (Base)	DALYS	DALYS per 100,000 population				YLL	YLD (Base)	DALYS	DALYS per 100,000 population
	YLL_1AV		19326.6				#NAME?		YLL_1AU	40135.8				#NAME?		YLL_1BV	344.558				#NAME?		YLL_1BU	762.205				#NAME?		YLL_1CV	135.735				#NAME?		YLL_1CU	302.794				#NAME?
	YLD_Acute_1AV			#NAME?			#NAME?		YLD_Acute_1AU		#NAME?			#NAME?		YLD_Acute_1BV		#NAME?			#NAME?		YLD_Acute_1BU		#NAME?			#NAME?		YLD_Acute_1CV		#NAME?			#NAME?		YLD_Acute_1CU		#NAME?			#NAME?
	YLD_Chronic_1AV			#NAME?			#NAME?		YLD_Chronic_1AU		#NAME?			#NAME?		YLD_Chronic_1BV		#NAME?			#NAME?		YLD_Chronic_1BU		#NAME?			#NAME?		YLD_Chronic_1CV		#NAME?			#NAME?		YLD_Chronic_1CU		#NAME?			#NAME?
	YLD_PICS_1AV			#NAME?			#NAME?		YLD_PICS_1AU		#NAME?			#NAME?		YLD_PICS_1BV		#NAME?			#NAME?		YLD_PICS_1BU		#NAME?			#NAME?		YLD_PICS_1CV		#NAME?			#NAME?		YLD_PICS_1CU		#NAME?			#NAME?
	DALY_Perm_Diab_1AV			#NAME?			#NAME?		DALY_Perm_Diab_1AU		#NAME?			#NAME?		DALY_Perm_Diab_1BV		#NAME?			#NAME?		DALY_Perm_Diab_1BU		#NAME?			#NAME?		DALY_Perm_Diab_1CV		#NAME?			#NAME?		DALY_Perm_Diab_1CU		#NAME?			#NAME?
	DALY_Perm_WoDiab_1AV			#NAME?			#NAME?		DALY_Perm_WoDiab_1AU		#NAME?			#NAME?		DALY_Perm_WoDiab_1BV		#NAME?			#NAME?		DALY_Perm_WoDiab_1BU		#NAME?			#NAME?		DALY_Perm_WoDiab_1CV		#NAME?			#NAME?		DALY_Perm_WoDiab_1CU		#NAME?			#NAME?
	TOTAL YLD Baseline_1AV			#NAME?		#NAME?	#NAME?		TOTAL YLD Baseline_1AU		#NAME?		#NAME?	#NAME?		TOTAL YLD Baseline_1BV		#NAME?		#NAME?	#NAME?		TOTAL YLD Baseline_1BU		#NAME?		#NAME?	#NAME?		TOTAL YLD Baseline_1CV		#NAME?		#NAME?	#NAME?		TOTAL YLD Baseline_1CU		#NAME?		#NAME?	#NAME?
	TOTAL YLD with Diabetes_1AV			#NAME?		#NAME?	#NAME?		TOTAL YLD with Diabetes_1AU		#NAME?		#NAME?	#NAME?		TOTAL YLD with Diabetes_1BV		#NAME?		#NAME?	#NAME?		TOTAL YLD with Diabetes_1BU		#NAME?		#NAME?	#NAME?		TOTAL YLD with Diabetes_1CV		#NAME?		#NAME?	#NAME?		TOTAL YLD with Diabetes_1CU		#NAME?		#NAME?	#NAME?
	TOTAL YLD without Diabetes_1AV			#NAME?		#NAME?	#NAME?		TOTAL YLD without Diabetes_1AU		#NAME?		#NAME?	#NAME?		TOTAL YLD without Diabetes_1BV		#NAME?		#NAME?	#NAME?		TOTAL YLD without Diabetes_1BU		#NAME?		#NAME?	#NAME?		TOTAL YLD without Diabetes_1CV		#NAME?		#NAME?	#NAME?		TOTAL YLD without Diabetes_1CU		#NAME?		#NAME?	#NAME?
	TOTAL DALYS Baseline_1AV				#NAME?	#NAME?	#NAME?		TOTAL DALYS Baseline_1AU			#NAME?	#NAME?	#NAME?		TOTAL DALYS Baseline_1BV			#NAME?	#NAME?	#NAME?		TOTAL DALYS Baseline_1BU			#NAME?	#NAME?	#NAME?		TOTAL DALYS Baseline_1CV			#NAME?	#NAME?	#NAME?		TOTAL DALYS Baseline_1CU			#NAME?	#NAME?	#NAME?
	Total DALY_D_1AV				#NAME?	#NAME?	#NAME?		Total DALY_D_1AU			#NAME?	#NAME?	#NAME?		Total DALY_D_1BV			#NAME?	#NAME?	#NAME?		Total DALY_D_1BU			#NAME?	#NAME?	#NAME?		Total DALY_D_1CV			#NAME?	#NAME?	#NAME?		Total DALY_D_1CU			#NAME?	#NAME?	#NAME?
	Total DALYS_WoD_1AV				#NAME?	#NAME?	#NAME?		Total DALYS_WoD_1AU			#NAME?	#NAME?	#NAME?		Total DALYS_WoD_1BV			#NAME?	#NAME?	#NAME?		Total DALYS_WoD_1BU			#NAME?	#NAME?	#NAME?		Total DALYS_WoD_1CV			#NAME?	#NAME?	#NAME?		Total DALYS_WoD_1CU			#NAME?	#NAME?	#NAME?
			Scenario IA_Combined													Scenario IB_Combined														Scenario IC_Combined
			TOTAL DALYS				ERRUNOUTPUT										TOTAL DALYS				ERRUNOUTPUT										TOTAL DALYS				ERRUNOUTPUT
			YLL	YLD (Base)	DALYS	DALYS per 100,000 population											YLL	YLD (Base)	DALYS	DALYS per 100,000 population											YLL	YLD (Base)	DALYS	DALYS per 100,000 population
	YLL_1A_Combined		#NAME?				#NAME?									YLL_1B_Combined	#NAME?				#NAME?									YLL_1C_Combined	#NAME?				#NAME?
	YLD_Acute_1A_Combined			#NAME?			#NAME?									YLD_Acute_1B_Combined		#NAME?			#NAME?									YLD_Acute_1C_Combined		#NAME?			#NAME?
	YLD_Chronic_1A_Combined			#NAME?			#NAME?									YLD_Chronic_1B_Combined		#NAME?			#NAME?									YLD_Chronic_1C_Combined		#NAME?			#NAME?
	YLD_PICS_1A_Combined			#NAME?			#NAME?									YLD_PICS_1B_Combined		#NAME?			#NAME?									YLD_PICS_1C_Combined		#NAME?			#NAME?
	DALY_Perm_Diab_1A_Combined			#NAME?			#NAME?									DALY_Perm_Diab_1B_Combined		#NAME?			#NAME?									DALY_Perm_Diab_1C_Combined		#NAME?			#NAME?
	DALY_Perm_WoDiab_1A_Combined			#NAME?			#NAME?									DALY_Perm_WoDiab_1B_Combined		#NAME?			#NAME?									DALY_Perm_WoDiab_1C_Combined		#NAME?			#NAME?
	TOTAL YLD Baseline_1A_Combined			#NAME?		#NAME?	#NAME?									TOTAL YLD Baseline_1B_Combined		#NAME?		#NAME?	#NAME?									TOTAL YLD Baseline_1C_Combined		#NAME?		#NAME?	#NAME?
	TOTAL YLD with Diabetes_1A_Combined			#NAME?		#NAME?	#NAME?									TOTAL YLD with Diabetes_1B_Combined		#NAME?		#NAME?	#NAME?									TOTAL YLD with Diabetes_1C_Combined		#NAME?		#NAME?	#NAME?
	TOTAL YLD without Diabetes_1A_Combined			#NAME?		#NAME?	#NAME?									TOTAL YLD without Diabetes_1B_Combined		#NAME?		#NAME?	#NAME?									TOTAL YLD without Diabetes_1C_Combined		#NAME?		#NAME?	#NAME?
	TOTAL DALYS Baseline_1A_Combined				#NAME?	#NAME?	#NAME?									TOTAL DALYS Baseline_1B_Combined			#NAME?	#NAME?	#NAME?									TOTAL DALYS Baseline_1C_Combined			#NAME?	#NAME?	#NAME?
	Total DALY_D_1A_Combined				#NAME?	#NAME?	#NAME?									Total DALY_D_1B_Combined			#NAME?	#NAME?	#NAME?									Total DALY_D_1C_Combined			#NAME?	#NAME?	#NAME?
	Total DALYS_WoD_1A_Combined				#NAME?	#NAME?	#NAME?									Total DALYS_WoD_1B_Combined			#NAME?	#NAME?	#NAME?									Total DALYS_WoD_1C_Combined			#NAME?	#NAME?	#NAME?

## Sheet: Scenario 2
DALYS Calculation: Scenario 2 (70% and high seeding infections assuming different combinations of PHSMs and TTIQ effectiveness)
Back to "read me"
Mortality (YLL)
				DEATH								YLL
	Age	Mid	LETotals	Scenario 2A_V (Vaccinated)	Scenario 2A_U (Unvaccinated)	Scenario 2B_V (Vaccinated)	Scenario 2B_U (Unvaccinated)	Scenario 2C_V (Vaccinated)	Scenario 2C_U (Unvaccinated)	Scenario 2D_V (Vaccinated)	Scenario 2D_U (Unvaccinated)	Scenario 2A_V (Vaccinated)	Scenario 2A_U (Unvaccinated)	Scenario 2B_V (Vaccinated)	Scenario 2B_U (Unvaccinated)	Scenario 2C_V (Vaccinated)	Scenario 2C_U (Unvaccinated)	Scenario 2D_V (Vaccinated)	Scenario 2D_U (Unvaccinated)
	0-9	5	78.2138	0	0	0	0	0	0	0	0	0	0	0	0	0	0	0	0
	10-19	15	68.2659	2.21117	4.57766	0.647284	1.46978	0.359602	0.806427	0.221117	0.504208	150.947	312.498	44.1874	100.336	24.5485	55.0514	15.0947	34.4202
	20-29	25	58.5115	15.4782	32.0436	4.53099	10.2884	2.51721	5.64499	1.54782	3.52946	905.653	1874.92	265.115	601.993	147.286	330.297	90.5653	206.514
	30-39	35	48.8546	19.9005	41.1989	5.82555	13.228	3.23642	7.25784	1.99005	4.53787	972.232	2012.76	284.605	646.248	158.114	354.579	97.2232	221.696
	40-49	45	39.3018	46.4346	96.1308	13.593	30.8653	7.55164	16.935	4.64346	10.5884	1824.96	3778.11	534.227	1213.06	296.793	665.574	182.496	416.142
	50-59	55	30.0933	121.614	251.771	35.6006	80.8378	19.7781	44.3535	12.1614	27.7314	3659.78	7576.62	1071.34	2432.67	595.188	1334.74	365.978	834.53
	60-69	65	21.403	207.85	430.3	60.8447	138.159	33.8026	75.8041	20.785	47.3956	4448.61	9209.69	1302.26	2957.01	723.476	1622.43	444.861	1014.41
	70-79	75	13.4485	557.215	1153.57	163.116	370.384	90.6197	203.22	55.7215	127.06	7493.71	15513.8	2193.66	4981.11	1218.7	2733	749.371	1708.77
	80-89	85	7.10454	1121.06	2320.87	328.173	745.178	182.318	408.858	112.106	255.634	7964.64	16488.7	2331.52	5294.14	1295.29	2904.75	796.464	1816.16
	90-100	95	3.45069	798.233	1652.53	233.669	530.59	129.816	291.12	79.8233	182.019	2754.45	5702.38	806.32	1830.9	447.955	1004.56	275.445	628.091
	weighted mean/Total			2890	5983	846	1921	470	1054	289	659	30175	62469.5	8833.23	20057.5	4907.35	11005	3017.5	6880.73
Morbidity (YLD)
PARAMETERS
AUSTALIAN POPULATION			Scenario 2A_V (Vaccinated)	Scenario 2A_U (Unvaccinated)	Scenario 2B_V (Vaccinated)	Scenario 2B_U (Unvaccinated)	Scenario 2C_V (Vaccinated)	Scenario 2C_U (Unvaccinated)	Scenario 2D_V (Vaccinated)	Scenario 2D_U (Unvaccinated)			Scenario 2A_V (Vaccinated)	Scenario 2A_U (Unvaccinated)	Scenario 2B_V (Vaccinated)	Scenario 2B_U (Unvaccinated)	Scenario 2C_V (Vaccinated)	Scenario 2C_U (Unvaccinated)	Scenario 2D_V (Vaccinated)	Scenario 2D_U (Unvaccinated)		PICS:ICU Survival	Scenario 2A_V (Vaccinated)	Scenario 2A_U (Unvaccinated)	Scenario 2B_V (Vaccinated)	Scenario 2B_U (Unvaccinated)	Scenario 2C_V (Vaccinated)	Scenario 2C_U (Unvaccinated)	Scenario 2D_V (Vaccinated)	Scenario 2D_U (Unvaccinated)
Australian COVID case (without death)			229041	961849	72744	365658	39560	205315	24041	131810		Moderate	214129	925121	68312	353047	37165	198249	22573	127380		60-69	447.522	490.768	118.805	135.083	64.6259	70.9427	38.1438	42.2741
Australian poulation as of 31Dec2020 (e)			25694393	25694393	25694393	25694393	25694393	25694393	25694393	25694393		Severe	13941	34607	4211	11948	2287	6682	1415	4215		70-79	204.89	224.689	54.3925	61.8451	29.5877	32.4798	17.4634	19.3544
Australian COVID case with deaths			231931	967832	73590	367579	40030	206369	24330	132469		Critical	3861	8104	1067	2584	578	1438	342	874		80-89	48.5265	53.2158	12.8824	14.6475	7.00762	7.69258	4.13608	4.58393
Ausrtalian COVID cases (>10 and above)			229041	571640	72744	214146	39560	121924	24041	77397.1												90+	0	0	0	0	0	0	0	0
Australian COVID cases (Hosp without death; >30 years old)			166495	242100	51979.1	88246.8	28138.9	50498.9	17250.4	31712.4												Totals	700.938	768.673	186.08	211.575	101.221	111.115	59.7434	66.2124
YEAR			365.25
DISABILITY WEIGHTS (g)			MID	LL	UL	sigma	alpha1	alpha2	ERSATZ
DW(Moderate)			0.051	0.032	0.074	0.0107143	21.4511	399.158	#NAME?
DW(Severe)			0.133	0.088	0.19	0.0260204	22.5184	146.793	#NAME?
DW(Critical)			0.655	0.579	0.727	0.0377551	103.182	54.3476	#NAME?
DW(Chronic)			0.219	0.148	0.308	0.0408163	22.2649	79.4013	#NAME?
DW(Afib as proxy for PICS) (i)			0.224	0.151	0.312	0.0410714	22.8582	79.1875	#NAME?
SEVERITY DISTRIBUTION
ACUTE (Proportion)			%	Duration (days)
N Asymptomatic (will not be added in the YLD) (h)			NA	14
N(Moderate) (a)			NA	14
N(Severe) (a)			NA	14
N(Critical)* (a)			NA	14
CHRONIC			%	Duration (days)		OR	95%CI LL	95%CI UL	RR	LL	UL	SE	ERSATZ
Post (acute) after symptomatic duration to 2 years			See ONS Post-Acute Sheet		Treatment effect of full dose of COVID vaccine	0.51	0.32	0.82	0.540174	0.346891	0.837179	0.0923705	#NAME?
Post-intesive care syndrome			%	Duration (days)
1) PICS			0.906	RLE
Permanent functional impairment			%	LL	UL		Duration	sigma	alpha1	alpha2	ERSATZ
2) Diabetes			0.0282921	0.0256649	0.0312028		RLE	0.00141273	389.685	13384	#NAME?
3) Parkinsons			0.0011	0.00079	0.0014		RLE	0.000155612	49.9126	45325.2	#NAME?
4) Dementia			0.0067	0.0059	0.0075		RLE	0.000408163	267.64	39678.7	#NAME?
5) Anxiety Disorders			0.0711	0.0682	0.0741		RLE	0.0015051	2072.82	27080.8	#NAME?
5) Ischaemic Stroke			0.0076	0.0068	0.0085		RLE	0.000433673	304.774	39797	#NAME?
ACUTE
Morbidity calculation (Total incidence cases/Checking/Scenario analysis)
			Scenario 2A						Scenario 2B						Scenario 2C						Scenario 2D
			Scenario 2A_V (Vaccinated)			Scenario 2A_U (Unvaccinated)			Scenario 2B_V (Vaccinated)			Scenario 2B_U (Unvaccinated)			Scenario 2C_V (Vaccinated)			Scenario 2C_U (Unvaccinated)			Scenario 2D_V (Vaccinated)			Scenario 2D_U (Unvaccinated)
				Case (Person - years)	YLD		Case (Person - years)	YLD		Case (Person - years)	YLD		Case (Person - years)	YLD		Case (Person - years)	YLD		Case (Person - years)	YLD		Case (Person - years)	YLD		Case (Person - years)	YLD
			Base	Base	Base DL	Base	Base	Base DL	Base	Base	Base DL	Base	Base	Base DL	Base	Base	Base DL	Base	Base	Base DL	Base	Base	Base DL	Base	Base	Base DL
	Moderate		214129	8207.55	#NAME?	925121	35459.8	#NAME?	68312	2618.39	#NAME?	353047	13532.3	#NAME?	37165	1424.53	#NAME?	198249	7598.87	#NAME?	22573	865.221	#NAME?	127380	4882.46	#NAME?
	Severe		13941	534.357	#NAME?	34607	1326.48	#NAME?	4211	161.407	#NAME?	11948	457.966	#NAME?	2287	87.6605	#NAME?	6682	256.12	#NAME?	1415	54.2368	#NAME?	4215	161.561	#NAME?
	Critical		3861	147.992	#NAME?	8104	310.626	#NAME?	1067	40.898	#NAME?	2584	99.0445	#NAME?	578	22.1547	#NAME?	1438	55.1184	#NAME?	342	13.1088	#NAME?	874	33.5003	#NAME?
	TOTAL				#NAME?			#NAME?			#NAME?			#NAME?			#NAME?			#NAME?			#NAME?			#NAME?
CHRONIC/LONG COVID
										SCENARIO 2A								SCENARIO 2B								SCENARIO 2C								SCENARIO 2D
			ONS			ERSATZ				Scenario 2A_V (Vaccinated)				Scenario 2A_U (Unvaccinated)				Scenario 2B_V (Vaccinated)				Scenario 2B_U (Unvaccinated)				Scenario 2C_V (Vaccinated)				Scenario 2C_U (Unvaccinated)				Scenario 2D_V (Vaccinated)				Scenario 2D_U (Unvaccinated)
	weeks		Baseline	LL	UL	sigma	alpha1	alpha2	Ersazt	Recalculation (mutually exclusive)	Incidence	DALYs/year	DALYS per 100,000	Recalculation (mutually exclusive)	Incidence	DALYs/year	DALYS per 100,000	Recalculation (mutually exclusive)	Incidence	DALYs/year	DALYS per 100,000	Recalculation (mutually exclusive)	Incidence	DALYs/year	DALYS per 100,000	Recalculation (mutually exclusive)	Incidence	DALYs/year	DALYS per 100,000	Recalculation (mutually exclusive)	Incidence	DALYs/year	DALYS per 100,000	Recalculation (mutually exclusive)	Incidence	DALYs/year	DALYS per 100,000	Recalculation (mutually exclusive)	Incidence	DALYs/year	DALYS per 100,000
	0		0.3111	0.2887	0.3358	0.0120153	461.524	1022	#NAME?	#NAME?	#NAME?	#NAME?	#NAME?	#NAME?	#NAME?	#NAME?	#NAME?	#NAME?	#NAME?	#NAME?	#NAME?	#NAME?	#NAME?	#NAME?	#NAME?	#NAME?	#NAME?	#NAME?	#NAME?	#NAME?	#NAME?	#NAME?	#NAME?	#NAME?	#NAME?	#NAME?	#NAME?	#NAME?	#NAME?	#NAME?	#NAME?
	1		0.29269	0.268376	0.319742	0.0131037	352.594	852.073	#NAME?	#NAME?	#NAME?	#NAME?	#NAME?	#NAME?	#NAME?	#NAME?	#NAME?	#NAME?	#NAME?	#NAME?	#NAME?	#NAME?	#NAME?	#NAME?	#NAME?	#NAME?	#NAME?	#NAME?	#NAME?	#NAME?	#NAME?	#NAME?	#NAME?	#NAME?	#NAME?	#NAME?	#NAME?	#NAME?	#NAME?	#NAME?	#NAME?
	2		0.27537	0.249482	0.304453	0.0140231	279.148	734.574	#NAME?	#NAME?	#NAME?	#NAME?	#NAME?	#NAME?	#NAME?	#NAME?	#NAME?	#NAME?	#NAME?	#NAME?	#NAME?	#NAME?	#NAME?	#NAME?	#NAME?	#NAME?	#NAME?	#NAME?	#NAME?	#NAME?	#NAME?	#NAME?	#NAME?	#NAME?	#NAME?	#NAME?	#NAME?	#NAME?	#NAME?	#NAME?	#NAME?
	3		0.259074	0.231919	0.289894	0.0147896	227.1	649.482	#NAME?	#NAME?	#NAME?	#NAME?	#NAME?	#NAME?	#NAME?	#NAME?	#NAME?	#NAME?	#NAME?	#NAME?	#NAME?	#NAME?	#NAME?	#NAME?	#NAME?	#NAME?	#NAME?	#NAME?	#NAME?	#NAME?	#NAME?	#NAME?	#NAME?	#NAME?	#NAME?	#NAME?	#NAME?	#NAME?	#NAME?	#NAME?	#NAME?
	4		0.243743	0.215592	0.276032	0.0154183	188.756	585.651	#NAME?	#NAME?	#NAME?	#NAME?	#NAME?	#NAME?	#NAME?	#NAME?	#NAME?	#NAME?	#NAME?	#NAME?	#NAME?	#NAME?	#NAME?	#NAME?	#NAME?	#NAME?	#NAME?	#NAME?	#NAME?	#NAME?	#NAME?	#NAME?	#NAME?	#NAME?	#NAME?	#NAME?	#NAME?	#NAME?	#NAME?	#NAME?	#NAME?
	5		0.229319	0.200415	0.262832	0.0159229	159.621	536.443	#NAME?	#NAME?	#NAME?	#NAME?	#NAME?	#NAME?	#NAME?	#NAME?	#NAME?	#NAME?	#NAME?	#NAME?	#NAME?	#NAME?	#NAME?	#NAME?	#NAME?	#NAME?	#NAME?	#NAME?	#NAME?	#NAME?	#NAME?	#NAME?	#NAME?	#NAME?	#NAME?	#NAME?	#NAME?	#NAME?	#NAME?	#NAME?	#NAME?
	6		0.215749	0.186306	0.250264	0.0163159	136.914	497.684	#NAME?	#NAME?	#NAME?	#NAME?	#NAME?	#NAME?	#NAME?	#NAME?	#NAME?	#NAME?	#NAME?	#NAME?	#NAME?	#NAME?	#NAME?	#NAME?	#NAME?	#NAME?	#NAME?	#NAME?	#NAME?	#NAME?	#NAME?	#NAME?	#NAME?	#NAME?	#NAME?	#NAME?	#NAME?	#NAME?	#NAME?	#NAME?	#NAME?
	7		0.202981	0.17319	0.238297	0.0166089	118.839	466.63	#NAME?	#NAME?	#NAME?	#NAME?	#NAME?	#NAME?	#NAME?	#NAME?	#NAME?	#NAME?	#NAME?	#NAME?	#NAME?	#NAME?	#NAME?	#NAME?	#NAME?	#NAME?	#NAME?	#NAME?	#NAME?	#NAME?	#NAME?	#NAME?	#NAME?	#NAME?	#NAME?	#NAME?	#NAME?	#NAME?	#NAME?	#NAME?	#NAME?
	8		0.19097	0.160997	0.226901	0.0168123	104.195	441.414	#NAME?	#NAME?	#NAME?	#NAME?	#NAME?	#NAME?	#NAME?	#NAME?	#NAME?	#NAME?	#NAME?	#NAME?	#NAME?	#NAME?	#NAME?	#NAME?	#NAME?	#NAME?	#NAME?	#NAME?	#NAME?	#NAME?	#NAME?	#NAME?	#NAME?	#NAME?	#NAME?	#NAME?	#NAME?	#NAME?	#NAME?	#NAME?	#NAME?
	9		0.179669	0.149663	0.216051	0.0169357	92.147	420.725	#NAME?	#NAME?	#NAME?	#NAME?	#NAME?	#NAME?	#NAME?	#NAME?	#NAME?	#NAME?	#NAME?	#NAME?	#NAME?	#NAME?	#NAME?	#NAME?	#NAME?	#NAME?	#NAME?	#NAME?	#NAME?	#NAME?	#NAME?	#NAME?	#NAME?	#NAME?	#NAME?	#NAME?	#NAME?	#NAME?	#NAME?	#NAME?	#NAME?
	10		0.169036	0.139127	0.20572	0.016988	82.1045	403.616	#NAME?	#NAME?	#NAME?	#NAME?	#NAME?	#NAME?	#NAME?	#NAME?	#NAME?	#NAME?	#NAME?	#NAME?	#NAME?	#NAME?	#NAME?	#NAME?	#NAME?	#NAME?	#NAME?	#NAME?	#NAME?	#NAME?	#NAME?	#NAME?	#NAME?	#NAME?	#NAME?	#NAME?	#NAME?	#NAME?	#NAME?	#NAME?	#NAME?
	11		0.159033	0.129333	0.195883	0.016977	73.6369	389.391	#NAME?	#NAME?	#NAME?	#NAME?	#NAME?	#NAME?	#NAME?	#NAME?	#NAME?	#NAME?	#NAME?	#NAME?	#NAME?	#NAME?	#NAME?	#NAME?	#NAME?	#NAME?	#NAME?	#NAME?	#NAME?	#NAME?	#NAME?	#NAME?	#NAME?	#NAME?	#NAME?	#NAME?	#NAME?	#NAME?	#NAME?	#NAME?	#NAME?
	12		0.149622	0.120228	0.186516	0.0169102	66.4248	377.525	#NAME?	#NAME?	#NAME?	#NAME?	#NAME?	#NAME?	#NAME?	#NAME?	#NAME?	#NAME?	#NAME?	#NAME?	#NAME?	#NAME?	#NAME?	#NAME?	#NAME?	#NAME?	#NAME?	#NAME?	#NAME?	#NAME?	#NAME?	#NAME?	#NAME?	#NAME?	#NAME?	#NAME?	#NAME?	#NAME?	#NAME?	#NAME?	#NAME?
	13		0.140768	0.111764	0.177597	0.0167941	60.227	367.618	#NAME?	#NAME?	#NAME?	#NAME?	#NAME?	#NAME?	#NAME?	#NAME?	#NAME?	#NAME?	#NAME?	#NAME?	#NAME?	#NAME?	#NAME?	#NAME?	#NAME?	#NAME?	#NAME?	#NAME?	#NAME?	#NAME?	#NAME?	#NAME?	#NAME?	#NAME?	#NAME?	#NAME?	#NAME?	#NAME?	#NAME?	#NAME?	#NAME?
	14		0.132438	0.103896	0.169104	0.0166348	54.8582	359.36	#NAME?	#NAME?	#NAME?	#NAME?	#NAME?	#NAME?	#NAME?	#NAME?	#NAME?	#NAME?	#NAME?	#NAME?	#NAME?	#NAME?	#NAME?	#NAME?	#NAME?	#NAME?	#NAME?	#NAME?	#NAME?	#NAME?	#NAME?	#NAME?	#NAME?	#NAME?	#NAME?	#NAME?	#NAME?	#NAME?	#NAME?	#NAME?	#NAME?
	15		0.124601	0.0965816	0.161018	0.0164378	50.1742	352.506	#NAME?	#NAME?	#NAME?	#NAME?	#NAME?	#NAME?	#NAME?	#NAME?	#NAME?	#NAME?	#NAME?	#NAME?	#NAME?	#NAME?	#NAME?	#NAME?	#NAME?	#NAME?	#NAME?	#NAME?	#NAME?	#NAME?	#NAME?	#NAME?	#NAME?	#NAME?	#NAME?	#NAME?	#NAME?	#NAME?	#NAME?	#NAME?	#NAME?
	16		0.117227	0.0897823	0.153318	0.0162081	46.0613	346.861	#NAME?	#NAME?	#NAME?	#NAME?	#NAME?	#NAME?	#NAME?	#NAME?	#NAME?	#NAME?	#NAME?	#NAME?	#NAME?	#NAME?	#NAME?	#NAME?	#NAME?	#NAME?	#NAME?	#NAME?	#NAME?	#NAME?	#NAME?	#NAME?	#NAME?	#NAME?	#NAME?	#NAME?	#NAME?	#NAME?	#NAME?	#NAME?	#NAME?
	17		0.11029	0.0834617	0.145987	0.0159503	42.4286	342.271	#NAME?	#NAME?	#NAME?	#NAME?	#NAME?	#NAME?	#NAME?	#NAME?	#NAME?	#NAME?	#NAME?	#NAME?	#NAME?	#NAME?	#NAME?	#NAME?	#NAME?	#NAME?	#NAME?	#NAME?	#NAME?	#NAME?	#NAME?	#NAME?	#NAME?	#NAME?	#NAME?	#NAME?	#NAME?	#NAME?	#NAME?	#NAME?	#NAME?
	18		0.103764	0.0775861	0.139006	0.0156683	39.2031	338.609	#NAME?	#NAME?	#NAME?	#NAME?	#NAME?	#NAME?	#NAME?	#NAME?	#NAME?	#NAME?	#NAME?	#NAME?	#NAME?	#NAME?	#NAME?	#NAME?	#NAME?	#NAME?	#NAME?	#NAME?	#NAME?	#NAME?	#NAME?	#NAME?	#NAME?	#NAME?	#NAME?	#NAME?	#NAME?	#NAME?	#NAME?	#NAME?	#NAME?
	19		0.0976231	0.0721241	0.132359	0.015366	36.3252	335.771	#NAME?	#NAME?	#NAME?	#NAME?	#NAME?	#NAME?	#NAME?	#NAME?	#NAME?	#NAME?	#NAME?	#NAME?	#NAME?	#NAME?	#NAME?	#NAME?	#NAME?	#NAME?	#NAME?	#NAME?	#NAME?	#NAME?	#NAME?	#NAME?	#NAME?	#NAME?	#NAME?	#NAME?	#NAME?	#NAME?	#NAME?	#NAME?	#NAME?
`	20		0.0918461	0.0670466	0.126029	0.0150466	33.7459	333.672	#NAME?	#NAME?	#NAME?	#NAME?	#NAME?	#NAME?	#NAME?	#NAME?	#NAME?	#NAME?	#NAME?	#NAME?	#NAME?	#NAME?	#NAME?	#NAME?	#NAME?	#NAME?	#NAME?	#NAME?	#NAME?	#NAME?	#NAME?	#NAME?	#NAME?	#NAME?	#NAME?	#NAME?	#NAME?	#NAME?	#NAME?	#NAME?	#NAME?
	21		0.086411	0.0623266	0.120003	0.0147133	31.4249	332.243	#NAME?	#NAME?	#NAME?	#NAME?	#NAME?	#NAME?	#NAME?	#NAME?	#NAME?	#NAME?	#NAME?	#NAME?	#NAME?	#NAME?	#NAME?	#NAME?	#NAME?	#NAME?	#NAME?	#NAME?	#NAME?	#NAME?	#NAME?	#NAME?	#NAME?	#NAME?	#NAME?	#NAME?	#NAME?	#NAME?	#NAME?	#NAME?	#NAME?
	22		0.0812974	0.0579388	0.114264	0.0143688	29.3283	331.424	#NAME?	#NAME?	#NAME?	#NAME?	#NAME?	#NAME?	#NAME?	#NAME?	#NAME?	#NAME?	#NAME?	#NAME?	#NAME?	#NAME?	#NAME?	#NAME?	#NAME?	#NAME?	#NAME?	#NAME?	#NAME?	#NAME?	#NAME?	#NAME?	#NAME?	#NAME?	#NAME?	#NAME?	#NAME?	#NAME?	#NAME?	#NAME?	#NAME?
	23		0.0764865	0.05386	0.1088	0.0140154	27.4278	331.169	#NAME?	#NAME?	#NAME?	#NAME?	#NAME?	#NAME?	#NAME?	#NAME?	#NAME?	#NAME?	#NAME?	#NAME?	#NAME?	#NAME?	#NAME?	#NAME?	#NAME?	#NAME?	#NAME?	#NAME?	#NAME?	#NAME?	#NAME?	#NAME?	#NAME?	#NAME?	#NAME?	#NAME?	#NAME?	#NAME?	#NAME?	#NAME?	#NAME?
	24		0.0719603	0.0500683	0.103598	0.0136555	25.6995	331.435	#NAME?	#NAME?	#NAME?	#NAME?	#NAME?	#NAME?	#NAME?	#NAME?	#NAME?	#NAME?	#NAME?	#NAME?	#NAME?	#NAME?	#NAME?	#NAME?	#NAME?	#NAME?	#NAME?	#NAME?	#NAME?	#NAME?	#NAME?	#NAME?	#NAME?	#NAME?	#NAME?	#NAME?	#NAME?	#NAME?	#NAME?	#NAME?	#NAME?
	25		0.0677019	0.0465435	0.0986438	0.0132909	24.123	332.189	#NAME?	#NAME?	#NAME?	#NAME?	#NAME?	#NAME?	#NAME?	#NAME?	#NAME?	#NAME?	#NAME?	#NAME?	#NAME?	#NAME?	#NAME?	#NAME?	#NAME?	#NAME?	#NAME?	#NAME?	#NAME?	#NAME?	#NAME?	#NAME?	#NAME?	#NAME?	#NAME?	#NAME?	#NAME?	#NAME?	#NAME?	#NAME?	#NAME?
	26		0.0636955	0.0432669	0.0939268	0.0129234	22.6809	333.402	#NAME?	#NAME?	#NAME?	#NAME?	#NAME?	#NAME?	#NAME?	#NAME?	#NAME?	#NAME?	#NAME?	#NAME?	#NAME?	#NAME?	#NAME?	#NAME?	#NAME?	#NAME?	#NAME?	#NAME?	#NAME?	#NAME?	#NAME?	#NAME?	#NAME?	#NAME?	#NAME?	#NAME?	#NAME?	#NAME?	#NAME?	#NAME?	#NAME?
	27		0.0599262	0.040221	0.0894353	0.0125547	21.3583	335.052	#NAME?	#NAME?	#NAME?	#NAME?	#NAME?	#NAME?	#NAME?	#NAME?	#NAME?	#NAME?	#NAME?	#NAME?	#NAME?	#NAME?	#NAME?	#NAME?	#NAME?	#NAME?	#NAME?	#NAME?	#NAME?	#NAME?	#NAME?	#NAME?	#NAME?	#NAME?	#NAME?	#NAME?	#NAME?	#NAME?	#NAME?	#NAME?	#NAME?
	28		0.05638	0.0373894	0.0851586	0.012186	20.1423	337.118	#NAME?	#NAME?	#NAME?	#NAME?	#NAME?	#NAME?	#NAME?	#NAME?	#NAME?	#NAME?	#NAME?	#NAME?	#NAME?	#NAME?	#NAME?	#NAME?	#NAME?	#NAME?	#NAME?	#NAME?	#NAME?	#NAME?	#NAME?	#NAME?	#NAME?	#NAME?	#NAME?	#NAME?	#NAME?	#NAME?	#NAME?	#NAME?	#NAME?
	29		0.0530436	0.0347572	0.0810864	0.0118187	19.0217	339.583	#NAME?	#NAME?	#NAME?	#NAME?	#NAME?	#NAME?	#NAME?	#NAME?	#NAME?	#NAME?	#NAME?	#NAME?	#NAME?	#NAME?	#NAME?	#NAME?	#NAME?	#NAME?	#NAME?	#NAME?	#NAME?	#NAME?	#NAME?	#NAME?	#NAME?	#NAME?	#NAME?	#NAME?	#NAME?	#NAME?	#NAME?	#NAME?	#NAME?
	30		0.0499047	0.0323104	0.077209	0.0114537	17.9867	342.435	#NAME?	#NAME?	#NAME?	#NAME?	#NAME?	#NAME?	#NAME?	#NAME?	#NAME?	#NAME?	#NAME?	#NAME?	#NAME?	#NAME?	#NAME?	#NAME?	#NAME?	#NAME?	#NAME?	#NAME?	#NAME?	#NAME?	#NAME?	#NAME?	#NAME?	#NAME?	#NAME?	#NAME?	#NAME?	#NAME?	#NAME?	#NAME?	#NAME?
	31		0.0469515	0.0300357	0.0735169	0.0110921	17.0289	345.663	#NAME?	#NAME?	#NAME?	#NAME?	#NAME?	#NAME?	#NAME?	#NAME?	#NAME?	#NAME?	#NAME?	#NAME?	#NAME?	#NAME?	#NAME?	#NAME?	#NAME?	#NAME?	#NAME?	#NAME?	#NAME?	#NAME?	#NAME?	#NAME?	#NAME?	#NAME?	#NAME?	#NAME?	#NAME?	#NAME?	#NAME?	#NAME?	#NAME?
	32		0.044173	0.0279213	0.0700014	0.0107347	16.1407	349.257	#NAME?	#NAME?	#NAME?	#NAME?	#NAME?	#NAME?	#NAME?	#NAME?	#NAME?	#NAME?	#NAME?	#NAME?	#NAME?	#NAME?	#NAME?	#NAME?	#NAME?	#NAME?	#NAME?	#NAME?	#NAME?	#NAME?	#NAME?	#NAME?	#NAME?	#NAME?	#NAME?	#NAME?	#NAME?	#NAME?	#NAME?	#NAME?	#NAME?
	33		0.041559	0.0259556	0.066654	0.0103823	15.3157	353.212	#NAME?	#NAME?	#NAME?	#NAME?	#NAME?	#NAME?	#NAME?	#NAME?	#NAME?	#NAME?	#NAME?	#NAME?	#NAME?	#NAME?	#NAME?	#NAME?	#NAME?	#NAME?	#NAME?	#NAME?	#NAME?	#NAME?	#NAME?	#NAME?	#NAME?	#NAME?	#NAME?	#NAME?	#NAME?	#NAME?	#NAME?	#NAME?	#NAME?
	34		0.0390997	0.0241284	0.0634667	0.0100353	14.5478	357.523	#NAME?	#NAME?	#NAME?	#NAME?	#NAME?	#NAME?	#NAME?	#NAME?	#NAME?	#NAME?	#NAME?	#NAME?	#NAME?	#NAME?	#NAME?	#NAME?	#NAME?	#NAME?	#NAME?	#NAME?	#NAME?	#NAME?	#NAME?	#NAME?	#NAME?	#NAME?	#NAME?	#NAME?	#NAME?	#NAME?	#NAME?	#NAME?	#NAME?
	35		0.0367859	0.0224297	0.0604318	0.00969441	13.8321	362.186	#NAME?	#NAME?	#NAME?	#NAME?	#NAME?	#NAME?	#NAME?	#NAME?	#NAME?	#NAME?	#NAME?	#NAME?	#NAME?	#NAME?	#NAME?	#NAME?	#NAME?	#NAME?	#NAME?	#NAME?	#NAME?	#NAME?	#NAME?	#NAME?	#NAME?	#NAME?	#NAME?	#NAME?	#NAME?	#NAME?	#NAME?	#NAME?	#NAME?
	36		0.034609	0.0208507	0.057542	0.00936003	13.164	367.198	#NAME?	#NAME?	#NAME?	#NAME?	#NAME?	#NAME?	#NAME?	#NAME?	#NAME?	#NAME?	#NAME?	#NAME?	#NAME?	#NAME?	#NAME?	#NAME?	#NAME?	#NAME?	#NAME?	#NAME?	#NAME?	#NAME?	#NAME?	#NAME?	#NAME?	#NAME?	#NAME?	#NAME?	#NAME?	#NAME?	#NAME?	#NAME?	#NAME?
	37		0.032561	0.0193828	0.0547904	0.00903255	12.5392	372.561	#NAME?	#NAME?	#NAME?	#NAME?	#NAME?	#NAME?	#NAME?	#NAME?	#NAME?	#NAME?	#NAME?	#NAME?	#NAME?	#NAME?	#NAME?	#NAME?	#NAME?	#NAME?	#NAME?	#NAME?	#NAME?	#NAME?	#NAME?	#NAME?	#NAME?	#NAME?	#NAME?	#NAME?	#NAME?	#NAME?	#NAME?	#NAME?	#NAME?
	38		0.0306341	0.0180183	0.0521704	0.00871228	11.9543	378.274	#NAME?	#NAME?	#NAME?	#NAME?	#NAME?	#NAME?	#NAME?	#NAME?	#NAME?	#NAME?	#NAME?	#NAME?	#NAME?	#NAME?	#NAME?	#NAME?	#NAME?	#NAME?	#NAME?	#NAME?	#NAME?	#NAME?	#NAME?	#NAME?	#NAME?	#NAME?	#NAME?	#NAME?	#NAME?	#NAME?	#NAME?	#NAME?	#NAME?
	39		0.0288213	0.0167498	0.0496757	0.00839946	11.4059	384.338	#NAME?	#NAME?	#NAME?	#NAME?	#NAME?	#NAME?	#NAME?	#NAME?	#NAME?	#NAME?	#NAME?	#NAME?	#NAME?	#NAME?	#NAME?	#NAME?	#NAME?	#NAME?	#NAME?	#NAME?	#NAME?	#NAME?	#NAME?	#NAME?	#NAME?	#NAME?	#NAME?	#NAME?	#NAME?	#NAME?	#NAME?	#NAME?	#NAME?
	40		0.0271157	0.0155707	0.0473003	0.00809429	10.891	390.757	#NAME?	#NAME?	#NAME?	#NAME?	#NAME?	#NAME?	#NAME?	#NAME?	#NAME?	#NAME?	#NAME?	#NAME?	#NAME?	#NAME?	#NAME?	#NAME?	#NAME?	#NAME?	#NAME?	#NAME?	#NAME?	#NAME?	#NAME?	#NAME?	#NAME?	#NAME?	#NAME?	#NAME?	#NAME?	#NAME?	#NAME?	#NAME?	#NAME?
	41		0.0255111	0.0144745	0.0450384	0.00779692	10.407	397.534	#NAME?	#NAME?	#NAME?	#NAME?	#NAME?	#NAME?	#NAME?	#NAME?	#NAME?	#NAME?	#NAME?	#NAME?	#NAME?	#NAME?	#NAME?	#NAME?	#NAME?	#NAME?	#NAME?	#NAME?	#NAME?	#NAME?	#NAME?	#NAME?	#NAME?	#NAME?	#NAME?	#NAME?	#NAME?	#NAME?	#NAME?	#NAME?	#NAME?
	42		0.0240015	0.0134555	0.0428847	0.00750746	9.95159	404.673	#NAME?	#NAME?	#NAME?	#NAME?	#NAME?	#NAME?	#NAME?	#NAME?	#NAME?	#NAME?	#NAME?	#NAME?	#NAME?	#NAME?	#NAME?	#NAME?	#NAME?	#NAME?	#NAME?	#NAME?	#NAME?	#NAME?	#NAME?	#NAME?	#NAME?	#NAME?	#NAME?	#NAME?	#NAME?	#NAME?	#NAME?	#NAME?	#NAME?
	43		0.0225811	0.0125082	0.040834	0.00722596	9.52251	412.18	#NAME?	#NAME?	#NAME?	#NAME?	#NAME?	#NAME?	#NAME?	#NAME?	#NAME?	#NAME?	#NAME?	#NAME?	#NAME?	#NAME?	#NAME?	#NAME?	#NAME?	#NAME?	#NAME?	#NAME?	#NAME?	#NAME?	#NAME?	#NAME?	#NAME?	#NAME?	#NAME?	#NAME?	#NAME?	#NAME?	#NAME?	#NAME?	#NAME?
	44		0.0212448	0.0116277	0.0388814	0.00695248	9.11783	420.06	#NAME?	#NAME?	#NAME?	#NAME?	#NAME?	#NAME?	#NAME?	#NAME?	#NAME?	#NAME?	#NAME?	#NAME?	#NAME?	#NAME?	#NAME?	#NAME?	#NAME?	#NAME?	#NAME?	#NAME?	#NAME?	#NAME?	#NAME?	#NAME?	#NAME?	#NAME?	#NAME?	#NAME?	#NAME?	#NAME?	#NAME?	#NAME?	#NAME?
	45		0.0199876	0.0108091	0.0370221	0.006687	8.73575	428.322	#NAME?	#NAME?	#NAME?	#NAME?	#NAME?	#NAME?	#NAME?	#NAME?	#NAME?	#NAME?	#NAME?	#NAME?	#NAME?	#NAME?	#NAME?	#NAME?	#NAME?	#NAME?	#NAME?	#NAME?	#NAME?	#NAME?	#NAME?	#NAME?	#NAME?	#NAME?	#NAME?	#NAME?	#NAME?	#NAME?	#NAME?	#NAME?	#NAME?
	46		0.0188048	0.0100481	0.0352518	0.0064295	8.37465	436.971	#NAME?	#NAME?	#NAME?	#NAME?	#NAME?	#NAME?	#NAME?	#NAME?	#NAME?	#NAME?	#NAME?	#NAME?	#NAME?	#NAME?	#NAME?	#NAME?	#NAME?	#NAME?	#NAME?	#NAME?	#NAME?	#NAME?	#NAME?	#NAME?	#NAME?	#NAME?	#NAME?	#NAME?	#NAME?	#NAME?	#NAME?	#NAME?	#NAME?
	47		0.017692	0.00934076	0.0335661	0.00617992	8.03307	446.017	#NAME?	#NAME?	#NAME?	#NAME?	#NAME?	#NAME?	#NAME?	#NAME?	#NAME?	#NAME?	#NAME?	#NAME?	#NAME?	#NAME?	#NAME?	#NAME?	#NAME?	#NAME?	#NAME?	#NAME?	#NAME?	#NAME?	#NAME?	#NAME?	#NAME?	#NAME?	#NAME?	#NAME?	#NAME?	#NAME?	#NAME?	#NAME?	#NAME?
	48		0.0166451	0.00868318	0.031961	0.00593821	7.70963	455.468	#NAME?	#NAME?	#NAME?	#NAME?	#NAME?	#NAME?	#NAME?	#NAME?	#NAME?	#NAME?	#NAME?	#NAME?	#NAME?	#NAME?	#NAME?	#NAME?	#NAME?	#NAME?	#NAME?	#NAME?	#NAME?	#NAME?	#NAME?	#NAME?	#NAME?	#NAME?	#NAME?	#NAME?	#NAME?	#NAME?	#NAME?	#NAME?	#NAME?
	49		0.0156601	0.00807189	0.0304326	0.00570427	7.40312	465.335	#NAME?	#NAME?	#NAME?	#NAME?	#NAME?	#NAME?	#NAME?	#NAME?	#NAME?	#NAME?	#NAME?	#NAME?	#NAME?	#NAME?	#NAME?	#NAME?	#NAME?	#NAME?	#NAME?	#NAME?	#NAME?	#NAME?	#NAME?	#NAME?	#NAME?	#NAME?	#NAME?	#NAME?	#NAME?	#NAME?	#NAME?	#NAME?	#NAME?
	50		0.0147334	0.00750364	0.0289774	0.005478	7.11238	475.628	#NAME?	#NAME?	#NAME?	#NAME?	#NAME?	#NAME?	#NAME?	#NAME?	#NAME?	#NAME?	#NAME?	#NAME?	#NAME?	#NAME?	#NAME?	#NAME?	#NAME?	#NAME?	#NAME?	#NAME?	#NAME?	#NAME?	#NAME?	#NAME?	#NAME?	#NAME?	#NAME?	#NAME?	#NAME?	#NAME?	#NAME?	#NAME?	#NAME?
	51		0.0138615	0.00697539	0.0275917	0.00525927	6.8364	486.357	#NAME?	#NAME?	#NAME?	#NAME?	#NAME?	#NAME?	#NAME?	#NAME?	#NAME?	#NAME?	#NAME?	#NAME?	#NAME?	#NAME?	#NAME?	#NAME?	#NAME?	#NAME?	#NAME?	#NAME?	#NAME?	#NAME?	#NAME?	#NAME?	#NAME?	#NAME?	#NAME?	#NAME?	#NAME?	#NAME?	#NAME?	#NAME?	#NAME?
	52		0.0130412	0.00648433	0.0262723	0.00504796	6.5742	497.536	#NAME?	#NAME?	#NAME?	#NAME?	#NAME?	#NAME?	#NAME?	#NAME?	#NAME?	#NAME?	#NAME?	#NAME?	#NAME?	#NAME?	#NAME?	#NAME?	#NAME?	#NAME?	#NAME?	#NAME?	#NAME?	#NAME?	#NAME?	#NAME?	#NAME?	#NAME?	#NAME?	#NAME?	#NAME?	#NAME?	#NAME?	#NAME?	#NAME?
	53		0.0122695	0.00602784	0.025016	0.00484392	6.32492	509.175	#NAME?	#NAME?	#NAME?	#NAME?	#NAME?	#NAME?	#NAME?	#NAME?	#NAME?	#NAME?	#NAME?	#NAME?	#NAME?	#NAME?	#NAME?	#NAME?	#NAME?	#NAME?	#NAME?	#NAME?	#NAME?	#NAME?	#NAME?	#NAME?	#NAME?	#NAME?	#NAME?	#NAME?	#NAME?	#NAME?	#NAME?	#NAME?	#NAME?
	54		0.0115434	0.00560348	0.0238198	0.00464701	6.08773	521.29	#NAME?	#NAME?	#NAME?	#NAME?	#NAME?	#NAME?	#NAME?	#NAME?	#NAME?	#NAME?	#NAME?	#NAME?	#NAME?	#NAME?	#NAME?	#NAME?	#NAME?	#NAME?	#NAME?	#NAME?	#NAME?	#NAME?	#NAME?	#NAME?	#NAME?	#NAME?	#NAME?	#NAME?	#NAME?	#NAME?	#NAME?	#NAME?	#NAME?
	55		0.0108603	0.005209	0.0226807	0.00445707	5.8619	533.892	#NAME?	#NAME?	#NAME?	#NAME?	#NAME?	#NAME?	#NAME?	#NAME?	#NAME?	#NAME?	#NAME?	#NAME?	#NAME?	#NAME?	#NAME?	#NAME?	#NAME?	#NAME?	#NAME?	#NAME?	#NAME?	#NAME?	#NAME?	#NAME?	#NAME?	#NAME?	#NAME?	#NAME?	#NAME?	#NAME?	#NAME?	#NAME?	#NAME?
	56		0.0102176	0.00484229	0.0215962	0.00427395	5.64672	546.998	#NAME?	#NAME?	#NAME?	#NAME?	#NAME?	#NAME?	#NAME?	#NAME?	#NAME?	#NAME?	#NAME?	#NAME?	#NAME?	#NAME?	#NAME?	#NAME?	#NAME?	#NAME?	#NAME?	#NAME?	#NAME?	#NAME?	#NAME?	#NAME?	#NAME?	#NAME?	#NAME?	#NAME?	#NAME?	#NAME?	#NAME?	#NAME?	#NAME?
	57		0.00961298	0.0045014	0.0205635	0.00409746	5.44157	560.623	#NAME?	#NAME?	#NAME?	#NAME?	#NAME?	#NAME?	#NAME?	#NAME?	#NAME?	#NAME?	#NAME?	#NAME?	#NAME?	#NAME?	#NAME?	#NAME?	#NAME?	#NAME?	#NAME?	#NAME?	#NAME?	#NAME?	#NAME?	#NAME?	#NAME?	#NAME?	#NAME?	#NAME?	#NAME?	#NAME?	#NAME?	#NAME?	#NAME?
	58		0.00904412	0.0041845	0.0195801	0.00392746	5.24584	574.783	#NAME?	#NAME?	#NAME?	#NAME?	#NAME?	#NAME?	#NAME?	#NAME?	#NAME?	#NAME?	#NAME?	#NAME?	#NAME?	#NAME?	#NAME?	#NAME?	#NAME?	#NAME?	#NAME?	#NAME?	#NAME?	#NAME?	#NAME?	#NAME?	#NAME?	#NAME?	#NAME?	#NAME?	#NAME?	#NAME?	#NAME?	#NAME?	#NAME?
	59		0.00850891	0.00388992	0.0186438	0.00376376	5.059	589.494	#NAME?	#NAME?	#NAME?	#NAME?	#NAME?	#NAME?	#NAME?	#NAME?	#NAME?	#NAME?	#NAME?	#NAME?	#NAME?	#NAME?	#NAME?	#NAME?	#NAME?	#NAME?	#NAME?	#NAME?	#NAME?	#NAME?	#NAME?	#NAME?	#NAME?	#NAME?	#NAME?	#NAME?	#NAME?	#NAME?	#NAME?	#NAME?	#NAME?
	60		0.00800538	0.00361607	0.0177523	0.00360618	4.88052	604.774	#NAME?	#NAME?	#NAME?	#NAME?	#NAME?	#NAME?	#NAME?	#NAME?	#NAME?	#NAME?	#NAME?	#NAME?	#NAME?	#NAME?	#NAME?	#NAME?	#NAME?	#NAME?	#NAME?	#NAME?	#NAME?	#NAME?	#NAME?	#NAME?	#NAME?	#NAME?	#NAME?	#NAME?	#NAME?	#NAME?	#NAME?	#NAME?	#NAME?
	61		0.00753165	0.0033615	0.0169034	0.00345457	4.70994	620.643	#NAME?	#NAME?	#NAME?	#NAME?	#NAME?	#NAME?	#NAME?	#NAME?	#NAME?	#NAME?	#NAME?	#NAME?	#NAME?	#NAME?	#NAME?	#NAME?	#NAME?	#NAME?	#NAME?	#NAME?	#NAME?	#NAME?	#NAME?	#NAME?	#NAME?	#NAME?	#NAME?	#NAME?	#NAME?	#NAME?	#NAME?	#NAME?	#NAME?
	62		0.00708595	0.00312486	0.0160951	0.00330874	4.54681	637.118	#NAME?	#NAME?	#NAME?	#NAME?	#NAME?	#NAME?	#NAME?	#NAME?	#NAME?	#NAME?	#NAME?	#NAME?	#NAME?	#NAME?	#NAME?	#NAME?	#NAME?	#NAME?	#NAME?	#NAME?	#NAME?	#NAME?	#NAME?	#NAME?	#NAME?	#NAME?	#NAME?	#NAME?	#NAME?	#NAME?	#NAME?	#NAME?	#NAME?
	63		0.00666663	0.00290487	0.0153255	0.00316852	4.39072	654.221	#NAME?	#NAME?	#NAME?	#NAME?	#NAME?	#NAME?	#NAME?	#NAME?	#NAME?	#NAME?	#NAME?	#NAME?	#NAME?	#NAME?	#NAME?	#NAME?	#NAME?	#NAME?	#NAME?	#NAME?	#NAME?	#NAME?	#NAME?	#NAME?	#NAME?	#NAME?	#NAME?	#NAME?	#NAME?	#NAME?	#NAME?	#NAME?	#NAME?
	64		0.00627212	0.00270037	0.0145926	0.00303374	4.2413	671.973	#NAME?	#NAME?	#NAME?	#NAME?	#NAME?	#NAME?	#NAME?	#NAME?	#NAME?	#NAME?	#NAME?	#NAME?	#NAME?	#NAME?	#NAME?	#NAME?	#NAME?	#NAME?	#NAME?	#NAME?	#NAME?	#NAME?	#NAME?	#NAME?	#NAME?	#NAME?	#NAME?	#NAME?	#NAME?	#NAME?	#NAME?	#NAME?	#NAME?
	65		0.00590096	0.00251026	0.0138948	0.00290422	4.09817	690.394	#NAME?	#NAME?	#NAME?	#NAME?	#NAME?	#NAME?	#NAME?	#NAME?	#NAME?	#NAME?	#NAME?	#NAME?	#NAME?	#NAME?	#NAME?	#NAME?	#NAME?	#NAME?	#NAME?	#NAME?	#NAME?	#NAME?	#NAME?	#NAME?	#NAME?	#NAME?	#NAME?	#NAME?	#NAME?	#NAME?	#NAME?	#NAME?	#NAME?
	66		0.00555176	0.00233354	0.0132304	0.00277981	3.96101	709.509	#NAME?	#NAME?	#NAME?	#NAME?	#NAME?	#NAME?	#NAME?	#NAME?	#NAME?	#NAME?	#NAME?	#NAME?	#NAME?	#NAME?	#NAME?	#NAME?	#NAME?	#NAME?	#NAME?	#NAME?	#NAME?	#NAME?	#NAME?	#NAME?	#NAME?	#NAME?	#NAME?	#NAME?	#NAME?	#NAME?	#NAME?	#NAME?	#NAME?
	67		0.00522322	0.00216926	0.0125977	0.00266032	3.82951	729.34	#NAME?	#NAME?	#NAME?	#NAME?	#NAME?	#NAME?	#NAME?	#NAME?	#NAME?	#NAME?	#NAME?	#NAME?	#NAME?	#NAME?	#NAME?	#NAME?	#NAME?	#NAME?	#NAME?	#NAME?	#NAME?	#NAME?	#NAME?	#NAME?	#NAME?	#NAME?	#NAME?	#NAME?	#NAME?	#NAME?	#NAME?	#NAME?	#NAME?
	68		0.00491413	0.00201655	0.0119953	0.0025456	3.70337	749.913	#NAME?	#NAME?	#NAME?	#NAME?	#NAME?	#NAME?	#NAME?	#NAME?	#NAME?	#NAME?	#NAME?	#NAME?	#NAME?	#NAME?	#NAME?	#NAME?	#NAME?	#NAME?	#NAME?	#NAME?	#NAME?	#NAME?	#NAME?	#NAME?	#NAME?	#NAME?	#NAME?	#NAME?	#NAME?	#NAME?	#NAME?	#NAME?	#NAME?
	69		0.00462333	0.00187459	0.0114217	0.00243549	3.58231	771.252	#NAME?	#NAME?	#NAME?	#NAME?	#NAME?	#NAME?	#NAME?	#NAME?	#NAME?	#NAME?	#NAME?	#NAME?	#NAME?	#NAME?	#NAME?	#NAME?	#NAME?	#NAME?	#NAME?	#NAME?	#NAME?	#NAME?	#NAME?	#NAME?	#NAME?	#NAME?	#NAME?	#NAME?	#NAME?	#NAME?	#NAME?	#NAME?	#NAME?
	70		0.00434973	0.00174262	0.0108755	0.00232983	3.46609	793.386	#NAME?	#NAME?	#NAME?	#NAME?	#NAME?	#NAME?	#NAME?	#NAME?	#NAME?	#NAME?	#NAME?	#NAME?	#NAME?	#NAME?	#NAME?	#NAME?	#NAME?	#NAME?	#NAME?	#NAME?	#NAME?	#NAME?	#NAME?	#NAME?	#NAME?	#NAME?	#NAME?	#NAME?	#NAME?	#NAME?	#NAME?	#NAME?	#NAME?
	71		0.00409233	0.00161994	0.0103555	0.00222845	3.35447	816.341	#NAME?	#NAME?	#NAME?	#NAME?	#NAME?	#NAME?	#NAME?	#NAME?	#NAME?	#NAME?	#NAME?	#NAME?	#NAME?	#NAME?	#NAME?	#NAME?	#NAME?	#NAME?	#NAME?	#NAME?	#NAME?	#NAME?	#NAME?	#NAME?	#NAME?	#NAME?	#NAME?	#NAME?	#NAME?	#NAME?	#NAME?	#NAME?	#NAME?
	72		0.00385016	0.0015059	0.00986029	0.00213122	3.2472	840.147	#NAME?	#NAME?	#NAME?	#NAME?	#NAME?	#NAME?	#NAME?	#NAME?	#NAME?	#NAME?	#NAME?	#NAME?	#NAME?	#NAME?	#NAME?	#NAME?	#NAME?	#NAME?	#NAME?	#NAME?	#NAME?	#NAME?	#NAME?	#NAME?	#NAME?	#NAME?	#NAME?	#NAME?	#NAME?	#NAME?	#NAME?	#NAME?	#NAME?
	73		0.00362232	0.00139988	0.00938878	0.00203799	3.14409	864.834	#NAME?	#NAME?	#NAME?	#NAME?	#NAME?	#NAME?	#NAME?	#NAME?	#NAME?	#NAME?	#NAME?	#NAME?	#NAME?	#NAME?	#NAME?	#NAME?	#NAME?	#NAME?	#NAME?	#NAME?	#NAME?	#NAME?	#NAME?	#NAME?	#NAME?	#NAME?	#NAME?	#NAME?	#NAME?	#NAME?	#NAME?	#NAME?	#NAME?
	74		0.00340796	0.00130133	0.00893982	0.00194859	3.04494	890.432	#NAME?	#NAME?	#NAME?	#NAME?	#NAME?	#NAME?	#NAME?	#NAME?	#NAME?	#NAME?	#NAME?	#NAME?	#NAME?	#NAME?	#NAME?	#NAME?	#NAME?	#NAME?	#NAME?	#NAME?	#NAME?	#NAME?	#NAME?	#NAME?	#NAME?	#NAME?	#NAME?	#NAME?	#NAME?	#NAME?	#NAME?	#NAME?	#NAME?
	75		0.00320629	0.00120972	0.00851233	0.00186291	2.94954	916.974	#NAME?	#NAME?	#NAME?	#NAME?	#NAME?	#NAME?	#NAME?	#NAME?	#NAME?	#NAME?	#NAME?	#NAME?	#NAME?	#NAME?	#NAME?	#NAME?	#NAME?	#NAME?	#NAME?	#NAME?	#NAME?	#NAME?	#NAME?	#NAME?	#NAME?	#NAME?	#NAME?	#NAME?	#NAME?	#NAME?	#NAME?	#NAME?	#NAME?
	76		0.00301655	0.00112456	0.00810528	0.0017808	2.85774	944.495	#NAME?	#NAME?	#NAME?	#NAME?	#NAME?	#NAME?	#NAME?	#NAME?	#NAME?	#NAME?	#NAME?	#NAME?	#NAME?	#NAME?	#NAME?	#NAME?	#NAME?	#NAME?	#NAME?	#NAME?	#NAME?	#NAME?	#NAME?	#NAME?	#NAME?	#NAME?	#NAME?	#NAME?	#NAME?	#NAME?	#NAME?	#NAME?	#NAME?
	77		0.00283804	0.00104539	0.0077177	0.00170212	2.76935	973.028	#NAME?	#NAME?	#NAME?	#NAME?	#NAME?	#NAME?	#NAME?	#NAME?	#NAME?	#NAME?	#NAME?	#NAME?	#NAME?	#NAME?	#NAME?	#NAME?	#NAME?	#NAME?	#NAME?	#NAME?	#NAME?	#NAME?	#NAME?	#NAME?	#NAME?	#NAME?	#NAME?	#NAME?	#NAME?	#NAME?	#NAME?	#NAME?	#NAME?
	78		0.0026701	0.000971794	0.00734864	0.00162675	2.68423	1002.61	#NAME?	#NAME?	#NAME?	#NAME?	#NAME?	#NAME?	#NAME?	#NAME?	#NAME?	#NAME?	#NAME?	#NAME?	#NAME?	#NAME?	#NAME?	#NAME?	#NAME?	#NAME?	#NAME?	#NAME?	#NAME?	#NAME?	#NAME?	#NAME?	#NAME?	#NAME?	#NAME?	#NAME?	#NAME?	#NAME?	#NAME?	#NAME?	#NAME?
	79		0.00251209	0.00090338	0.00699724	0.00155456	2.60223	1033.28	#NAME?	#NAME?	#NAME?	#NAME?	#NAME?	#NAME?	#NAME?	#NAME?	#NAME?	#NAME?	#NAME?	#NAME?	#NAME?	#NAME?	#NAME?	#NAME?	#NAME?	#NAME?	#NAME?	#NAME?	#NAME?	#NAME?	#NAME?	#NAME?	#NAME?	#NAME?	#NAME?	#NAME?	#NAME?	#NAME?	#NAME?	#NAME?	#NAME?
	80		0.00236343	0.000839783	0.00666264	0.00148542	2.5232	1065.08	#NAME?	#NAME?	#NAME?	#NAME?	#NAME?	#NAME?	#NAME?	#NAME?	#NAME?	#NAME?	#NAME?	#NAME?	#NAME?	#NAME?	#NAME?	#NAME?	#NAME?	#NAME?	#NAME?	#NAME?	#NAME?	#NAME?	#NAME?	#NAME?	#NAME?	#NAME?	#NAME?	#NAME?	#NAME?	#NAME?	#NAME?	#NAME?	#NAME?
	81		0.00222357	0.000780663	0.00634404	0.00141923	2.44701	1098.04	#NAME?	#NAME?	#NAME?	#NAME?	#NAME?	#NAME?	#NAME?	#NAME?	#NAME?	#NAME?	#NAME?	#NAME?	#NAME?	#NAME?	#NAME?	#NAME?	#NAME?	#NAME?	#NAME?	#NAME?	#NAME?	#NAME?	#NAME?	#NAME?	#NAME?	#NAME?	#NAME?	#NAME?	#NAME?	#NAME?	#NAME?	#NAME?	#NAME?
	82		0.00209199	0.000725705	0.00604067	0.00135586	2.37354	1132.21	#NAME?	#NAME?	#NAME?	#NAME?	#NAME?	#NAME?	#NAME?	#NAME?	#NAME?	#NAME?	#NAME?	#NAME?	#NAME?	#NAME?	#NAME?	#NAME?	#NAME?	#NAME?	#NAME?	#NAME?	#NAME?	#NAME?	#NAME?	#NAME?	#NAME?	#NAME?	#NAME?	#NAME?	#NAME?	#NAME?	#NAME?	#NAME?	#NAME?
	83		0.00196819	0.000674616	0.00575182	0.0012952	2.30267	1167.64	#NAME?	#NAME?	#NAME?	#NAME?	#NAME?	#NAME?	#NAME?	#NAME?	#NAME?	#NAME?	#NAME?	#NAME?	#NAME?	#NAME?	#NAME?	#NAME?	#NAME?	#NAME?	#NAME?	#NAME?	#NAME?	#NAME?	#NAME?	#NAME?	#NAME?	#NAME?	#NAME?	#NAME?	#NAME?	#NAME?	#NAME?	#NAME?	#NAME?
	84		0.00185172	0.000627123	0.00547677	0.00123716	2.23428	1204.36	#NAME?	#NAME?	#NAME?	#NAME?	#NAME?	#NAME?	#NAME?	#NAME?	#NAME?	#NAME?	#NAME?	#NAME?	#NAME?	#NAME?	#NAME?	#NAME?	#NAME?	#NAME?	#NAME?	#NAME?	#NAME?	#NAME?	#NAME?	#NAME?	#NAME?	#NAME?	#NAME?	#NAME?	#NAME?	#NAME?	#NAME?	#NAME?	#NAME?
	85		0.00174214	0.000582974	0.00521488	0.00118161	2.16827	1242.43	#NAME?	#NAME?	#NAME?	#NAME?	#NAME?	#NAME?	#NAME?	#NAME?	#NAME?	#NAME?	#NAME?	#NAME?	#NAME?	#NAME?	#NAME?	#NAME?	#NAME?	#NAME?	#NAME?	#NAME?	#NAME?	#NAME?	#NAME?	#NAME?	#NAME?	#NAME?	#NAME?	#NAME?	#NAME?	#NAME?	#NAME?	#NAME?	#NAME?
	86		0.00163905	0.000541934	0.00496551	0.00112846	2.10454	1281.9	#NAME?	#NAME?	#NAME?	#NAME?	#NAME?	#NAME?	#NAME?	#NAME?	#NAME?	#NAME?	#NAME?	#NAME?	#NAME?	#NAME?	#NAME?	#NAME?	#NAME?	#NAME?	#NAME?	#NAME?	#NAME?	#NAME?	#NAME?	#NAME?	#NAME?	#NAME?	#NAME?	#NAME?	#NAME?	#NAME?	#NAME?	#NAME?	#NAME?
	87		0.00154205	0.000503782	0.00472806	0.00107762	2.04299	1322.81	#NAME?	#NAME?	#NAME?	#NAME?	#NAME?	#NAME?	#NAME?	#NAME?	#NAME?	#NAME?	#NAME?	#NAME?	#NAME?	#NAME?	#NAME?	#NAME?	#NAME?	#NAME?	#NAME?	#NAME?	#NAME?	#NAME?	#NAME?	#NAME?	#NAME?	#NAME?	#NAME?	#NAME?	#NAME?	#NAME?	#NAME?	#NAME?	#NAME?
	88		0.0014508	0.000468316	0.00450197	0.00102899	1.98354	1365.22	#NAME?	#NAME?	#NAME?	#NAME?	#NAME?	#NAME?	#NAME?	#NAME?	#NAME?	#NAME?	#NAME?	#NAME?	#NAME?	#NAME?	#NAME?	#NAME?	#NAME?	#NAME?	#NAME?	#NAME?	#NAME?	#NAME?	#NAME?	#NAME?	#NAME?	#NAME?	#NAME?	#NAME?	#NAME?	#NAME?	#NAME?	#NAME?	#NAME?
	89		0.00136495	0.000435347	0.00428669	0.000982486	1.92609	1409.19	#NAME?	#NAME?	#NAME?	#NAME?	#NAME?	#NAME?	#NAME?	#NAME?	#NAME?	#NAME?	#NAME?	#NAME?	#NAME?	#NAME?	#NAME?	#NAME?	#NAME?	#NAME?	#NAME?	#NAME?	#NAME?	#NAME?	#NAME?	#NAME?	#NAME?	#NAME?	#NAME?	#NAME?	#NAME?	#NAME?	#NAME?	#NAME?	#NAME?
	90		0.00128417	0.000404699	0.00408171	0.000938013	1.87057	1454.76	#NAME?	#NAME?	#NAME?	#NAME?	#NAME?	#NAME?	#NAME?	#NAME?	#NAME?	#NAME?	#NAME?	#NAME?	#NAME?	#NAME?	#NAME?	#NAME?	#NAME?	#NAME?	#NAME?	#NAME?	#NAME?	#NAME?	#NAME?	#NAME?	#NAME?	#NAME?	#NAME?	#NAME?	#NAME?	#NAME?	#NAME?	#NAME?	#NAME?
	91		0.00120818	0.000376208	0.00388653	0.000895489	1.81689	1502.01	#NAME?	#NAME?	#NAME?	#NAME?	#NAME?	#NAME?	#NAME?	#NAME?	#NAME?	#NAME?	#NAME?	#NAME?	#NAME?	#NAME?	#NAME?	#NAME?	#NAME?	#NAME?	#NAME?	#NAME?	#NAME?	#NAME?	#NAME?	#NAME?	#NAME?	#NAME?	#NAME?	#NAME?	#NAME?	#NAME?	#NAME?	#NAME?	#NAME?
	92		0.00113668	0.000349724	0.00370068	0.000854835	1.76498	1550.98	#NAME?	#NAME?	#NAME?	#NAME?	#NAME?	#NAME?	#NAME?	#NAME?	#NAME?	#NAME?	#NAME?	#NAME?	#NAME?	#NAME?	#NAME?	#NAME?	#NAME?	#NAME?	#NAME?	#NAME?	#NAME?	#NAME?	#NAME?	#NAME?	#NAME?	#NAME?	#NAME?	#NAME?	#NAME?	#NAME?	#NAME?	#NAME?	#NAME?
	93		0.00106942	0.000325103	0.00352371	0.000815972	1.71478	1601.76	#NAME?	#NAME?	#NAME?	#NAME?	#NAME?	#NAME?	#NAME?	#NAME?	#NAME?	#NAME?	#NAME?	#NAME?	#NAME?	#NAME?	#NAME?	#NAME?	#NAME?	#NAME?	#NAME?	#NAME?	#NAME?	#NAME?	#NAME?	#NAME?	#NAME?	#NAME?	#NAME?	#NAME?	#NAME?	#NAME?	#NAME?	#NAME?	#NAME?
	94		0.00100613	0.000302216	0.00335521	0.000778826	1.66621	1654.39	#NAME?	#NAME?	#NAME?	#NAME?	#NAME?	#NAME?	#NAME?	#NAME?	#NAME?	#NAME?	#NAME?	#NAME?	#NAME?	#NAME?	#NAME?	#NAME?	#NAME?	#NAME?	#NAME?	#NAME?	#NAME?	#NAME?	#NAME?	#NAME?	#NAME?	#NAME?	#NAME?	#NAME?	#NAME?	#NAME?	#NAME?	#NAME?	#NAME?
	95		0.000946593	0.000280941	0.00319477	0.000743324	1.61922	1708.95	#NAME?	#NAME?	#NAME?	#NAME?	#NAME?	#NAME?	#NAME?	#NAME?	#NAME?	#NAME?	#NAME?	#NAME?	#NAME?	#NAME?	#NAME?	#NAME?	#NAME?	#NAME?	#NAME?	#NAME?	#NAME?	#NAME?	#NAME?	#NAME?	#NAME?	#NAME?	#NAME?	#NAME?	#NAME?	#NAME?	#NAME?	#NAME?	#NAME?
	96		0.000890577	0.000261163	0.003042	0.000709398	1.57373	1765.52	#NAME?	#NAME?	#NAME?	#NAME?	#NAME?	#NAME?	#NAME?	#NAME?	#NAME?	#NAME?	#NAME?	#NAME?	#NAME?	#NAME?	#NAME?	#NAME?	#NAME?	#NAME?	#NAME?	#NAME?	#NAME?	#NAME?	#NAME?	#NAME?	#NAME?	#NAME?	#NAME?	#NAME?	#NAME?	#NAME?	#NAME?	#NAME?	#NAME?
	97		0.000837876	0.000242777	0.00289654	0.000676979	1.5297	1824.16	#NAME?	#NAME?	#NAME?	#NAME?	#NAME?	#NAME?	#NAME?	#NAME?	#NAME?	#NAME?	#NAME?	#NAME?	#NAME?	#NAME?	#NAME?	#NAME?	#NAME?	#NAME?	#NAME?	#NAME?	#NAME?	#NAME?	#NAME?	#NAME?	#NAME?	#NAME?	#NAME?	#NAME?	#NAME?	#NAME?	#NAME?	#NAME?	#NAME?
	98		0.000788293	0.000225686	0.00275803	0.000646006	1.48707	1884.95	#NAME?	#NAME?	#NAME?	#NAME?	#NAME?	#NAME?	#NAME?	#NAME?	#NAME?	#NAME?	#NAME?	#NAME?	#NAME?	#NAME?	#NAME?	#NAME?	#NAME?	#NAME?	#NAME?	#NAME?	#NAME?	#NAME?	#NAME?	#NAME?	#NAME?	#NAME?	#NAME?	#NAME?	#NAME?	#NAME?	#NAME?	#NAME?	#NAME?
	99		0.000741644	0.000209798	0.00262614	0.000616414	1.44578	1947.97	#NAME?	#NAME?	#NAME?	#NAME?	#NAME?	#NAME?	#NAME?	#NAME?	#NAME?	#NAME?	#NAME?	#NAME?	#NAME?	#NAME?	#NAME?	#NAME?	#NAME?	#NAME?	#NAME?	#NAME?	#NAME?	#NAME?	#NAME?	#NAME?	#NAME?	#NAME?	#NAME?	#NAME?	#NAME?	#NAME?	#NAME?	#NAME?	#NAME?
	100		0.000697756	0.000195028	0.00250056	0.000588147	1.40578	2013.31	#NAME?	#NAME?	#NAME?	#NAME?	#NAME?	#NAME?	#NAME?	#NAME?	#NAME?	#NAME?	#NAME?	#NAME?	#NAME?	#NAME?	#NAME?	#NAME?	#NAME?	#NAME?	#NAME?	#NAME?	#NAME?	#NAME?	#NAME?	#NAME?	#NAME?	#NAME?	#NAME?	#NAME?	#NAME?	#NAME?	#NAME?	#NAME?	#NAME?
	101		0.000656465	0.000181298	0.00238099	0.000561145	1.36703	2081.05	#NAME?	#NAME?	#NAME?	#NAME?	#NAME?	#NAME?	#NAME?	#NAME?	#NAME?	#NAME?	#NAME?	#NAME?	#NAME?	#NAME?	#NAME?	#NAME?	#NAME?	#NAME?	#NAME?	#NAME?	#NAME?	#NAME?	#NAME?	#NAME?	#NAME?	#NAME?	#NAME?	#NAME?	#NAME?	#NAME?	#NAME?	#NAME?	#NAME?
	102		0.000617618	0.000168535	0.00226713	0.000535356	1.32948	2151.27	#NAME?	#NAME?	#NAME?	#NAME?	#NAME?	#NAME?	#NAME?	#NAME?	#NAME?	#NAME?	#NAME?	#NAME?	#NAME?	#NAME?	#NAME?	#NAME?	#NAME?	#NAME?	#NAME?	#NAME?	#NAME?	#NAME?	#NAME?	#NAME?	#NAME?	#NAME?	#NAME?	#NAME?	#NAME?	#NAME?	#NAME?	#NAME?	#NAME?
	103		0.000581069	0.00015667	0.00215872	0.000510727	1.29309	2224.08	#NAME?	#NAME?	#NAME?	#NAME?	#NAME?	#NAME?	#NAME?	#NAME?	#NAME?	#NAME?	#NAME?	#NAME?	#NAME?	#NAME?	#NAME?	#NAME?	#NAME?	#NAME?	#NAME?	#NAME?	#NAME?	#NAME?	#NAME?	#NAME?	#NAME?	#NAME?	#NAME?	#NAME?	#NAME?	#NAME?	#NAME?	#NAME?	#NAME?
	104		0.000546683	0.000145641	0.00205549	0.000487207	1.25782	2299.56	#NAME?	#NAME?			0	#NAME?			0	#NAME?			0	#NAME?			0	#NAME?			0	#NAME?			0	#NAME?			0	#NAME?			0
	YLD										#NAME?	#NAME?	#NAME?		#NAME?	#NAME?	#NAME?		#NAME?	#NAME?	#NAME?		#NAME?	#NAME?	#NAME?		#NAME?	#NAME?	#NAME?		#NAME?	#NAME?	#NAME?		#NAME?	#NAME?	#NAME?		#NAME?	#NAME?	#NAME?
PICS
			SCENARIO 2A												SCENARIO 2B												SCENARIO 2C												SCENARIO 2D
			Scenario 2A_V (Vaccinated)						Scenario 2A_U (Unvaccinated)						Scenario 2B (Vaccinated)						Scenario 2B_U (Unvaccinated)						Scenario 2C (Vaccinated)						Scenario 2C_U (Unvaccinated)						Scenario 2D (Vaccinated)						Scenario 2D_U (Unvaccinated)
			COVID INCIDENCE	PICS INCIDENCE	LE tables (Yrs)	Duration (days)	Incidence-per year	DALYS	COVID INCIDENCE	PICS INCIDENCE	LE tables (Yrs)	Duration (days)	Incidence-per year	DALYS	COVID INCIDENCE	PICS INCIDENCE	LE tables (Yrs)	Duration (days)	Incidence-per year	DALYS	COVID INCIDENCE	PICS INCIDENCE	LE tables (Yrs)	Duration (days)	Incidence-per year	DALYS	COVID INCIDENCE	PICS INCIDENCE	LE tables (Yrs)	Duration (days)	Incidence-per year	DALYS	COVID INCIDENCE	PICS INCIDENCE	LE tables (Yrs)	Duration (days)	Incidence-per year	DALYS	COVID INCIDENCE	PICS INCIDENCE	LE tables (Yrs)	Duration (days)	Incidence-per year	DALYS	COVID INCIDENCE	PICS INCIDENCE	LE tables (Yrs)	Duration (days)	Incidence-per year
	60-69		447.522	405.455	21.403	7803.43	8662.39	#NAME?	490.768	444.636	21.403	7803.43	9499.48	#NAME?	118.805	107.637	21.403	7803.43	2299.63	#NAME?	135.083	122.385	21.403	7803.43	2614.71	#NAME?	64.6259	58.551	21.403	7803.43	1250.92	#NAME?	70.9427	64.2741	21.403	7803.43	1373.19	#NAME?	38.1438	34.5583	21.403	7803.43	738.326	#NAME?	42.2741	38.3003	21.403	7803.43	818.272
	70-79		204.89	185.63	13.4485	4898.07	2489.33	#NAME?	224.689	203.568	13.4485	4898.07	2729.88	#NAME?	54.3925	49.2796	13.4485	4898.07	660.848	#NAME?	61.8451	56.0316	13.4485	4898.07	751.394	#NAME?	29.5877	26.8065	13.4485	4898.07	359.48	#NAME?	32.4798	29.4267	13.4485	4898.07	394.617	#NAME?	17.4634	15.8219	13.4485	4898.07	212.174	#NAME?	19.3544	17.5351	13.4485	4898.07	235.148
	80-89		48.5265	43.965	7.10454	2580.93	310.666	#NAME?	53.2158	48.2135	7.10454	2580.93	340.687	#NAME?	12.8824	11.6715	7.10454	2580.93	82.4731	#NAME?	14.6475	13.2706	7.10454	2580.93	93.7731	#NAME?	7.00762	6.34891	7.10454	2580.93	44.8627	#NAME?	7.69258	6.96948	7.10454	2580.93	49.2478	#NAME?	4.13608	3.74729	7.10454	2580.93	26.4791	#NAME?	4.58393	4.15304	7.10454	2580.93	29.3463
	90+		0	0	3.45069	1246.36	0	#NAME?	0	0	3.45069	1246.36	0	#NAME?	0	0	3.45069	1246.36	0	#NAME?	0	0	3.45069	1246.36	0	#NAME?	0	0	3.45069	1246.36	0	#NAME?	0	0	3.45069	1246.36	0	#NAME?	0	0	3.45069	1246.36	0	#NAME?	0	0	3.45069	1246.36	0
	TOTAL		700.938	635.05			11462.4	#NAME?	768.673	696.417			12570	#NAME?	186.08	168.588			3042.95	#NAME?	211.575	191.687			3459.87	#NAME?	101.221	91.7064			1655.26	#NAME?	111.115	100.67			1817.06	#NAME?	59.7434	54.1275			976.979	#NAME?	66.2124	59.9884			1082.77
Permanent
					SCENARIO 2A				SCENARIO 2B				SCENARIO 2C				SCENARIO 2D
					Scenario 2A (Vaccinated)		Scenario 2A (UNVaccinated)		Scenario 2B (Vaccinated)		Scenario 2B (UNVaccinated)		Scenario 2C (Vaccinated)		Scenario 2C (UNVaccinated)		Scenario 2D (Vaccinated)		Scenario 2D (UNVaccinated)
			IHME 2019		COVID-19 consequences		COVID-19 consequences		COVID-19 consequences		COVID-19 consequences		COVID-19 consequences		COVID-19 consequences		COVID-19 consequences		COVID-19 consequences
					Base		Base		Base		Base		Base		Base		Base		Base
			Incidence Base	DALYS Base	Incidence	DALYS	Incidence	DALYS	Incidence	DALYS	Incidence	DALYS	Incidence	DALYS	Incidence	DALYS	Incidence	DALYS	Incidence	DALYS
1	Diabetes	587	69042.8	186528	#NAME?	#NAME?	#NAME?	#NAME?	#NAME?	#NAME?	#NAME?	#NAME?	#NAME?	#NAME?	#NAME?	#NAME?	#NAME?	#NAME?	#NAME?	#NAME?
2	Parkinsons	544	6598.01	38742.5	#NAME?	#NAME?	#NAME?	#NAME?	#NAME?	#NAME?	#NAME?	#NAME?	#NAME?	#NAME?	#NAME?	#NAME?	#NAME?	#NAME?	#NAME?	#NAME?
3	Dementia	543	43968.6	154293	#NAME?	#NAME?	#NAME?	#NAME?	#NAME?	#NAME?	#NAME?	#NAME?	#NAME?	#NAME?	#NAME?	#NAME?	#NAME?	#NAME?	#NAME?	#NAME?
4	Anxiety disorders	571	188750	139108	#NAME?	#NAME?	#NAME?	#NAME?	#NAME?	#NAME?	#NAME?	#NAME?	#NAME?	#NAME?	#NAME?	#NAME?	#NAME?	#NAME?	#NAME?	#NAME?
5	Ischemic Stroke	495	17984.1	114238	#NAME?	#NAME?	#NAME?	#NAME?	#NAME?	#NAME?	#NAME?	#NAME?	#NAME?	#NAME?	#NAME?	#NAME?	#NAME?	#NAME?	#NAME?	#NAME?
	Total with Diabetes					#NAME?		#NAME?		#NAME?		#NAME?		#NAME?		#NAME?		#NAME?		#NAME?
	Total without Diabetes					#NAME?		#NAME?		#NAME?		#NAME?		#NAME?		#NAME?		#NAME?		#NAME?
DALYS
			Scenario 2A_V (Vaccinated)							Scenario 2A_U (Unvaccinated)							Scenario 2B_V (Vaccinated)							Scenario 2B_U (Unvaccinated)							Scenario 2C_V (Vaccinated)							Scenario 2C_U (Unvaccinated)							Scenario 2D_V (Vaccinated)
			TOTAL DALYS				ERRUNOUTPUT			TOTAL DALYS				ERRUNOUTPUT			TOTAL DALYS				ERRUNOUTPUT			TOTAL DALYS				ERRUNOUTPUT			TOTAL DALYS				ERRUNOUTPUT			TOTAL DALYS				ERRUNOUTPUT			TOTAL DALYS				ERRUNOUTPUT
			YLL	YLD (Base)	DALYS	DALYS per 100,000 population				YLL	YLD (Base)	DALYS	DALYS per 100,000 population				YLL	YLD (Base)	DALYS	DALYS per 100,000 population				YLL	YLD (Base)	DALYS	DALYS per 100,000 population				YLL	YLD (Base)	DALYS	DALYS per 100,000 population				YLL	YLD (Base)	DALYS	DALYS per 100,000 population				YLL	YLD (Base)	DALYS	DALYS per 100,000 population
	YLL_2AV		30175				#NAME?		YLL_2AU	62469.5				#NAME?		YLL_2BV	8833.23				#NAME?		YLL_2BU	20057.5				#NAME?		YLL_2CV	4907.35				#NAME?		YLL_2CU	11005				#NAME?		YLL_2DV	3017.5				#NAME?
	YLD_Acute_2AV			#NAME?			#NAME?		YLD_Acute_2AU		#NAME?			#NAME?		YLD_Acute_2BV		#NAME?			#NAME?		YLD_Acute_2BU		#NAME?			#NAME?		YLD_Acute_2CV		#NAME?			#NAME?		YLD_Acute_2CU		#NAME?			#NAME?		YLD_Acute_2DV		#NAME?			#NAME?
	YLD_Chronic_2AV			#NAME?			#NAME?		YLD_Chronic_2AU		#NAME?			#NAME?		YLD_Chronic_2BV		#NAME?			#NAME?		YLD_Chronic_2BU		#NAME?			#NAME?		YLD_Chronic_2CV		#NAME?			#NAME?		YLD_Chronic_2CU		#NAME?			#NAME?		YLD_Chronic_2DV		#NAME?			#NAME?
	YLD_PICS_2AV			#NAME?			#NAME?		YLD_PICS_2AU		#NAME?			#NAME?		YLD_PICS_2BV		#NAME?			#NAME?		YLD_PICS_2BU		#NAME?			#NAME?		YLD_PICS_2CV		#NAME?			#NAME?		YLD_PICS_2CU		#NAME?			#NAME?		YLD_PICS_2DV		#NAME?			#NAME?
	DALY_Perm_Diab_2AV			#NAME?			#NAME?		DALY_Perm_Diab_2AU		#NAME?			#NAME?		DALY_Perm_Diab_2BV		#NAME?			#NAME?		DALY_Perm_Diab_2BU		#NAME?			#NAME?		DALY_Perm_Diab_2CV		#NAME?			#NAME?		DALY_Perm_Diab_2CU		#NAME?			#NAME?		DALY_Perm_Diab_2DV		#NAME?			#NAME?
	DALY_Perm_WoDiab_2AV			#NAME?			#NAME?		DALY_Perm_WoDiab_2AU		#NAME?			#NAME?		DALY_Perm_WoDiab_2BV		#NAME?			#NAME?		DALY_Perm_WoDiab_2BU		#NAME?			#NAME?		DALY_Perm_WoDiab_2CV		#NAME?			#NAME?		DALY_Perm_WoDiab_2CU		#NAME?			#NAME?		DALY_Perm_WoDiab_2DV		#NAME?			#NAME?
	TOTAL YLD Baseline_2AV			#NAME?		#NAME?	#NAME?		TOTAL YLD Baseline_2AU		#NAME?		#NAME?	#NAME?		TOTAL YLD Baseline_2BV		#NAME?		#NAME?	#NAME?		TOTAL YLD Baseline_2BU		#NAME?		#NAME?	#NAME?		TOTAL YLD Baseline_2CV		#NAME?		#NAME?	#NAME?		TOTAL YLD Baseline_2CU		#NAME?		#NAME?	#NAME?		TOTAL YLD Baseline_2DV		#NAME?		#NAME?	#NAME?
	TOTAL YLD with Diabetes_2AV			#NAME?		#NAME?	#NAME?		TOTAL YLD with Diabetes_2AU		#NAME?		#NAME?	#NAME?		TOTAL YLD with Diabetes_2BV		#NAME?		#NAME?	#NAME?		TOTAL YLD with Diabetes_2BU		#NAME?		#NAME?	#NAME?		TOTAL YLD with Diabetes_2CV		#NAME?		#NAME?	#NAME?		TOTAL YLD with Diabetes_2CU		#NAME?		#NAME?	#NAME?		TOTAL YLD with Diabetes_2DV		#NAME?		#NAME?	#NAME?
	TOTAL YLD without Diabetes_2AV			#NAME?		#NAME?	#NAME?		TOTAL YLD without Diabetes_2AU		#NAME?		#NAME?	#NAME?		TOTAL YLD without Diabetes_2BV		#NAME?		#NAME?	#NAME?		TOTAL YLD without Diabetes_2BU		#NAME?		#NAME?	#NAME?		TOTAL YLD without Diabetes_2CV		#NAME?		#NAME?	#NAME?		TOTAL YLD without Diabetes_2CU		#NAME?		#NAME?	#NAME?		TOTAL YLD without Diabetes_2DV		#NAME?		#NAME?	#NAME?
	TOTAL DALYS Baseline_2AV				#NAME?	#NAME?	#NAME?		TOTAL DALYS Baseline_2AU			#NAME?	#NAME?	#NAME?		TOTAL DALYS Baseline_2BV			#NAME?	#NAME?	#NAME?		TOTAL DALYS Baseline_2BU			#NAME?	#NAME?	#NAME?		TOTAL DALYS Baseline_2CV			#NAME?	#NAME?	#NAME?		TOTAL DALYS Baseline_2CU			#NAME?	#NAME?	#NAME?		TOTAL DALYS Baseline_2DV			#NAME?	#NAME?	#NAME?
	Total DALY_D_2AV				#NAME?	#NAME?	#NAME?		Total DALY_D_2AU			#NAME?	#NAME?	#NAME?		Total DALY_D_2BV			#NAME?	#NAME?	#NAME?		Total DALY_D_2BU			#NAME?	#NAME?	#NAME?		Total DALY_D_2CV			#NAME?	#NAME?	#NAME?		Total DALY_D_2CU			#NAME?	#NAME?	#NAME?		Total DALY_D_2DV			#NAME?	#NAME?	#NAME?
	Total DALYS_WoD_2AV				#NAME?	#NAME?	#NAME?		Total DALYS_WoD_2AU			#NAME?	#NAME?	#NAME?		Total DALYS_WoD_2BV			#NAME?	#NAME?	#NAME?		Total DALYS_WoD_2BU			#NAME?	#NAME?	#NAME?		Total DALYS_WoD_2CV			#NAME?	#NAME?	#NAME?		Total DALYS_WoD_2CU			#NAME?	#NAME?	#NAME?		Total DALYS_WoD_2DV			#NAME?	#NAME?	#NAME?
			Scenario 2A_Combined													Scenario 2B_Combined														Scenario 2C_Combined														Scenario 2D_Combined
			TOTAL DALYS				ERRUNOUTPUT										TOTAL DALYS				ERRUNOUTPUT										TOTAL DALYS				ERRUNOUTPUT										TOTAL DALYS				ERRUNOUTPUT
			YLL	YLD (Base)	DALYS	DALYS per 100,000 population											YLL	YLD (Base)	DALYS	DALYS per 100,000 population											YLL	YLD (Base)	DALYS	DALYS per 100,000 population											YLL	YLD (Base)	DALYS	DALYS per 100,000 population
	YLL_2A_Combined		#NAME?				#NAME?									YLL_2B_Combined	#NAME?				#NAME?									YLL_2C_Combined	#NAME?				#NAME?									YLL_2D_Combined	#NAME?				#NAME?
	YLD_Acute_2A_Combined			#NAME?			#NAME?									YLD_Acute_2B_Combined		#NAME?			#NAME?									YLD_Acute_2C_Combined		#NAME?			#NAME?									YLD_Acute_2D_Combined		#NAME?			#NAME?
	YLD_Chronic_2A_Combined			#NAME?			#NAME?									YLD_Chronic_2B_Combined		#NAME?			#NAME?									YLD_Chronic_2C_Combined		#NAME?			#NAME?									YLD_Chronic_2D_Combined		#NAME?			#NAME?
	YLD_PICS_2A_Combined			#NAME?			#NAME?									YLD_PICS_2B_Combined		#NAME?			#NAME?									YLD_PICS_2C_Combined		#NAME?			#NAME?									YLD_PICS_2D_Combined		#NAME?			#NAME?
	DALY_Perm_Diab_2A_Combined			#NAME?			#NAME?									DALY_Perm_Diab_2B_Combined		#NAME?			#NAME?									DALY_Perm_Diab_2C_Combined		#NAME?			#NAME?									DALY_Perm_Diab_2D_Combined		#NAME?			#NAME?
	DALY_Perm_WoDiab_2A_Combined			#NAME?			#NAME?									DALY_Perm_WoDiab_2B_Combined		#NAME?			#NAME?									DALY_Perm_WoDiab_2C_Combined		#NAME?			#NAME?									DALY_Perm_WoDiab_2D_Combined		#NAME?			#NAME?
	TOTAL YLD Baseline_2A_Combined			#NAME?		#NAME?	#NAME?									TOTAL YLD Baseline_2B_Combined		#NAME?		#NAME?	#NAME?									TOTAL YLD Baseline_2C_Combined		#NAME?		#NAME?	#NAME?									TOTAL YLD Baseline_2D_Combined		#NAME?		#NAME?	#NAME?
	TOTAL YLD with Diabetes_2A_Combined			#NAME?		#NAME?	#NAME?									TOTAL YLD with Diabetes_2B_Combined		#NAME?		#NAME?	#NAME?									TOTAL YLD with Diabetes_2C_Combined		#NAME?		#NAME?	#NAME?									TOTAL YLD with Diabetes_2D_Combined		#NAME?		#NAME?	#NAME?
	TOTAL YLD without Diabetes_2A_Combined			#NAME?		#NAME?	#NAME?									TOTAL YLD without Diabetes_2B_Combined		#NAME?		#NAME?	#NAME?									TOTAL YLD without Diabetes_2C_Combined		#NAME?		#NAME?	#NAME?									TOTAL YLD without Diabetes_2D_Combined		#NAME?		#NAME?	#NAME?
	TOTAL DALYS Baseline_2A_Combined				#NAME?	#NAME?	#NAME?									TOTAL DALYS Baseline_2B_Combined			#NAME?	#NAME?	#NAME?									TOTAL DALYS Baseline_2C_Combined			#NAME?	#NAME?	#NAME?									TOTAL DALYS Baseline_2D_Combined			#NAME?	#NAME?	#NAME?
	Total DALY_D_2A_Combined				#NAME?	#NAME?	#NAME?									Total DALY_D_2B_Combined			#NAME?	#NAME?	#NAME?									Total DALY_D_2C_Combined			#NAME?	#NAME?	#NAME?									Total DALY_D_2D_Combined			#NAME?	#NAME?	#NAME?
	Total DALYS_WoD_2A_Combined				#NAME?	#NAME?	#NAME?									Total DALYS_WoD_2B_Combined			#NAME?	#NAME?	#NAME?									Total DALYS_WoD_2C_Combined			#NAME?	#NAME?	#NAME?									Total DALYS_WoD_2D_Combined			#NAME?	#NAME?	#NAME?
[truncated: 1 more columns]

## Sheet: Scenario 3
DALYS Calculation (Scenario 3: 80% and low, medium or high seeding infections assuming baseline PHSMs and partial TTIQ)
Back to "read me"
Mortality (YLL)
				DEATH						YLL
	Age	Mid	LETotals	Scenario 3A_V (Vaccinated)	Scenario 3A_U (Unvaccinated)	Scenario 3B_V (Vaccinated)	Scenario 3B_U (Unvaccinated)	Scenario 3C_V (Vaccinated)	Scenario 3C_U (Unvaccinated)	Scenario 3A_V (Vaccinated)	Scenario 3A_U (Unvaccinated)	Scenario 3B_V (Vaccinated)	Scenario 3B_U (Unvaccinated)	Scenario 3C_V (Vaccinated)	Scenario 3C_U (Unvaccinated)
	0-9	5	78.2138	0	0	0	0	0	0	0	0	0	0	0	0
	10-19	15	68.2659	1.0153	2.12777	1.59755	3.30069	1.74981	3.39097	69.3105	145.254	109.058	225.324	119.452	231.488
	20-29	25	58.5115	7.10712	14.8944	11.1829	23.1048	12.2487	23.7368	415.848	871.495	654.327	1351.9	716.688	1388.88
	30-39	35	48.8546	9.13772	19.15	14.378	29.7062	15.7483	30.5187	446.419	935.563	702.429	1451.28	769.375	1490.98
	40-49	45	39.3018	21.3213	44.6832	33.5486	69.3145	36.746	71.2104	837.966	1756.13	1318.52	2724.18	1444.18	2798.69
	50-59	55	30.0933	55.8416	117.028	87.8653	181.538	96.2395	186.503	1680.46	3521.74	2644.16	5463.07	2896.16	5612.5
	60-69	65	21.403	95.4384	200.011	150.17	310.265	164.482	318.751	2042.66	4280.82	3214.08	6640.58	3520.4	6822.22
	70-79	75	13.4485	255.856	536.199	402.583	831.774	440.952	854.525	3440.88	7211.07	5414.14	11186.1	5930.14	11492.1
	80-89	85	7.10454	514.758	1078.78	809.959	1673.45	887.153	1719.22	3657.12	7664.24	5754.38	11889.1	6302.81	12214.3
	90-100	95	3.45069	366.524	768.126	576.716	1191.55	631.681	1224.14	1264.76	2650.56	1990.07	4111.66	2179.73	4224.12
	weighted mean/Total			1327	2781	2088	4314	2287	4432	13855.4	29036.9	21801.2	45043.2	23878.9	46275.2
Morbidity (YLD)
PARAMETERS
AUSTALIAN POPULATION			Scenario 3A_V (Vaccinated)	Scenario 3A_U (Unvaccinated)	Scenario 3B_V (Vaccinated)	Scenario 3B_U (Unvaccinated)	Scenario 3C_V (Vaccinated)	Scenario 3C_U (Unvaccinated)		ACUTE	Scenario 3A_V (Vaccinated)	Scenario 3A_U (Unvaccinated)	Scenario 3B_V (Vaccinated)	Scenario 3B_U (Unvaccinated)	Scenario 3C_V (Vaccinated)	Scenario 3C_U (Unvaccinated)		PICS:ICU Survival	Scenario 3A_V (Vaccinated)	Scenario 3A_U (Unvaccinated)	Scenario 3B_V (Vaccinated)	Scenario 3B_U (Unvaccinated)	Scenario 3C_V (Vaccinated)	Scenario 3C_U (Unvaccinated)
Australian COVID case (without death)			113940	629681	147707	760248	162025	799410		Moderate	106334	609981	137237	734187	150509	770708		60-69	165.938	183.674	296.161	327.26	349.368	382.167
Australian poulation as of 31Dec2020 (e)			25694393	25694393	25694393	25694393	25694393	25694393		Severe	7576	19480	10117	25205	10907	27067		70-79	75.9715	84.0915	135.592	149.83	159.952	174.968
Australian COVID case with deaths			115267	632462	149795	764562	164312	803842		Critical	1357	3001	2441	5170	2896	6067		80-89	17.9933	19.9164	32.1139	35.486	37.8833	41.4398
Ausrtalian COVID cases (>10 and above)			113940	340914	147707	417260	162025	445354										90+	0	0	0	0	0	0
Australian COVID cases (Hosp without death; >30 years old)			87864.4	134325	113498	166919	123227	180517										Totals	259.903	287.681	463.867	512.575	547.204	598.575
YEAR			365.25
DISABILITY WEIGHTS (g)			MID	LL	UL	sigma	alpha1	alpha2	ERSATZ
DW(Moderate)			0.051	0.032	0.074	0.0107143	21.4511	399.158	#NAME?
DW(Severe)			0.133	0.088	0.19	0.0260204	22.5184	146.793	#NAME?
DW(Critical)			0.655	0.579	0.727	0.0377551	103.182	54.3476	#NAME?
DW(Chronic)			0.219	0.148	0.308	0.0408163	22.2649	79.4013	#NAME?
DW(Afib as proxy for PICS) (i)			0.224	0.151	0.312	0.0410714	22.8582	79.1875	#NAME?
SEVERITY DISTRIBUTION
ACUTE (Proportion)			%	Duration (days)
N Asymptomatic (will not be added in the YLD) (h)			NA	14
N(Moderate) (a)			NA	14
N(Severe) (a)			NA	14
N(Critical)* (a)			NA	14
CHRONIC			%	Duration (days)		OR	95%CI LL	95%CI UL	RR	LL	UL	SE	ERSATZ
Post (acute) after symptomatic duration to 2 years			See ONS Post-Acute Sheet		Treatment effect of full dose of COVID vaccine	0.51	0.32	0.82	0.540174	0.346891	0.837179	0.0923705	#NAME?
Post-intesive care syndrome			%	Duration (days)
1) PICS			0.906	RLE
Permanent functional impairment			%	LL	UL		Duration	sigma	alpha1	alpha2	ERSATZ
2) Diabetes			0.0282921	0.0256649	0.0312028		RLE	0.00141273	389.685	13384	#NAME?
3) Parkinsons			0.0011	0.00079	0.0014		RLE	0.000155612	49.9126	45325.2	#NAME?
4) Dementia			0.0067	0.0059	0.0075		RLE	0.000408163	267.64	39678.7	#NAME?
5) Anxiety Disorders			0.0711	0.0682	0.0741		RLE	0.0015051	2072.82	27080.8	#NAME?
5) Ischaemic Stroke			0.0076	0.0068	0.0085		RLE	0.000433673	304.774	39797	#NAME?
ACUTE
Morbidity calculation (Total incidence cases/Checking/Scenario analysis)
			Scenario 3A						Scenario 3B						Scenario 3C
			Scenario 3A_V (Vaccinated)			Scenario 3A_U (Unvaccinated)			Scenario 3B_V (Vaccinated)			Scenario 3B_U (Unvaccinated)			Scenario 3C_V (Vaccinated)			Scenario 3C_U (Unvaccinated)
				Case (Person - years)	YLD		Case (Person - years)	YLD		Case (Person - years)	YLD		Case (Person - years)	YLD		Case (Person - years)	YLD		Case (Person - years)	YLD
			Base	Base	Base DL	Base	Base	Base DL	Base	Base	Base DL	Base	Base	Base DL	Base	Base	Base DL	Base	Base	Base DL
	Moderate		106334	4075.77	#NAME?	609981	23380.5	#NAME?	137237	5260.28	#NAME?	734187	28141.3	#NAME?	150509	5769	#NAME?	770708	29541.2	#NAME?
	Severe		7576	290.387	#NAME?	19480	746.667	#NAME?	10117	387.784	#NAME?	25205	966.105	#NAME?	10907	418.064	#NAME?	27067	1037.48	#NAME?
	Critical		1357	52.0137	#NAME?	3001	115.028	#NAME?	2441	93.5633	#NAME?	5170	198.166	#NAME?	2896	111.003	#NAME?	6067	232.548	#NAME?
	TOTAL				#NAME?			#NAME?			#NAME?			#NAME?			#NAME?			#NAME?
CHRONIC/LONG COVID
										SCENARIO 3A								SCENARIO 3B								SCENARIO 3C
			ONS			ERSATZ				Scenario 3A_V (Vaccinated)				Scenario 3A_U (Unvaccinated)				Scenario 3B_V (Vaccinated)				Scenario 3B_U (Unvaccinated)				Scenario 3C_V (Vaccinated)				Scenario 3C_U (Unvaccinated)
	weeks		Baseline	LL	UL	sigma	alpha1	alpha2	Ersazt	Recalculation (mutually exclusive)	Incidence	DALYs/year	DALYS per 100,000	Recalculation (mutually exclusive)	Incidence	DALYs/year	DALYS per 100,000	Recalculation (mutually exclusive)	Incidence	DALYs/year	DALYS per 100,000	Recalculation (mutually exclusive)	Incidence	DALYs/year	DALYS per 100,000	Recalculation (mutually exclusive)	Incidence	DALYs/year	DALYS per 100,000	Recalculation (mutually exclusive)	Incidence	DALYs/year	DALYS per 100,000
	0		0.3111	0.2887	0.3358	0.0120153	461.524	1022	#NAME?	#NAME?	#NAME?	#NAME?	#NAME?	#NAME?	#NAME?	#NAME?	#NAME?	#NAME?	#NAME?	#NAME?	#NAME?	#NAME?	#NAME?	#NAME?	#NAME?	#NAME?	#NAME?	#NAME?	#NAME?	#NAME?	#NAME?	#NAME?	#NAME?
	1		0.29269	0.268376	0.319742	0.0131037	352.594	852.073	#NAME?	#NAME?	#NAME?	#NAME?	#NAME?	#NAME?	#NAME?	#NAME?	#NAME?	#NAME?	#NAME?	#NAME?	#NAME?	#NAME?	#NAME?	#NAME?	#NAME?	#NAME?	#NAME?	#NAME?	#NAME?	#NAME?	#NAME?	#NAME?	#NAME?
	2		0.27537	0.249482	0.304453	0.0140231	279.148	734.574	#NAME?	#NAME?	#NAME?	#NAME?	#NAME?	#NAME?	#NAME?	#NAME?	#NAME?	#NAME?	#NAME?	#NAME?	#NAME?	#NAME?	#NAME?	#NAME?	#NAME?	#NAME?	#NAME?	#NAME?	#NAME?	#NAME?	#NAME?	#NAME?	#NAME?
	3		0.259074	0.231919	0.289894	0.0147896	227.1	649.482	#NAME?	#NAME?	#NAME?	#NAME?	#NAME?	#NAME?	#NAME?	#NAME?	#NAME?	#NAME?	#NAME?	#NAME?	#NAME?	#NAME?	#NAME?	#NAME?	#NAME?	#NAME?	#NAME?	#NAME?	#NAME?	#NAME?	#NAME?	#NAME?	#NAME?
	4		0.243743	0.215592	0.276032	0.0154183	188.756	585.651	#NAME?	#NAME?	#NAME?	#NAME?	#NAME?	#NAME?	#NAME?	#NAME?	#NAME?	#NAME?	#NAME?	#NAME?	#NAME?	#NAME?	#NAME?	#NAME?	#NAME?	#NAME?	#NAME?	#NAME?	#NAME?	#NAME?	#NAME?	#NAME?	#NAME?
	5		0.229319	0.200415	0.262832	0.0159229	159.621	536.443	#NAME?	#NAME?	#NAME?	#NAME?	#NAME?	#NAME?	#NAME?	#NAME?	#NAME?	#NAME?	#NAME?	#NAME?	#NAME?	#NAME?	#NAME?	#NAME?	#NAME?	#NAME?	#NAME?	#NAME?	#NAME?	#NAME?	#NAME?	#NAME?	#NAME?
	6		0.215749	0.186306	0.250264	0.0163159	136.914	497.684	#NAME?	#NAME?	#NAME?	#NAME?	#NAME?	#NAME?	#NAME?	#NAME?	#NAME?	#NAME?	#NAME?	#NAME?	#NAME?	#NAME?	#NAME?	#NAME?	#NAME?	#NAME?	#NAME?	#NAME?	#NAME?	#NAME?	#NAME?	#NAME?	#NAME?
	7		0.202981	0.17319	0.238297	0.0166089	118.839	466.63	#NAME?	#NAME?	#NAME?	#NAME?	#NAME?	#NAME?	#NAME?	#NAME?	#NAME?	#NAME?	#NAME?	#NAME?	#NAME?	#NAME?	#NAME?	#NAME?	#NAME?	#NAME?	#NAME?	#NAME?	#NAME?	#NAME?	#NAME?	#NAME?	#NAME?
	8		0.19097	0.160997	0.226901	0.0168123	104.195	441.414	#NAME?	#NAME?	#NAME?	#NAME?	#NAME?	#NAME?	#NAME?	#NAME?	#NAME?	#NAME?	#NAME?	#NAME?	#NAME?	#NAME?	#NAME?	#NAME?	#NAME?	#NAME?	#NAME?	#NAME?	#NAME?	#NAME?	#NAME?	#NAME?	#NAME?
	9		0.179669	0.149663	0.216051	0.0169357	92.147	420.725	#NAME?	#NAME?	#NAME?	#NAME?	#NAME?	#NAME?	#NAME?	#NAME?	#NAME?	#NAME?	#NAME?	#NAME?	#NAME?	#NAME?	#NAME?	#NAME?	#NAME?	#NAME?	#NAME?	#NAME?	#NAME?	#NAME?	#NAME?	#NAME?	#NAME?
	10		0.169036	0.139127	0.20572	0.016988	82.1045	403.616	#NAME?	#NAME?	#NAME?	#NAME?	#NAME?	#NAME?	#NAME?	#NAME?	#NAME?	#NAME?	#NAME?	#NAME?	#NAME?	#NAME?	#NAME?	#NAME?	#NAME?	#NAME?	#NAME?	#NAME?	#NAME?	#NAME?	#NAME?	#NAME?	#NAME?
	11		0.159033	0.129333	0.195883	0.016977	73.6369	389.391	#NAME?	#NAME?	#NAME?	#NAME?	#NAME?	#NAME?	#NAME?	#NAME?	#NAME?	#NAME?	#NAME?	#NAME?	#NAME?	#NAME?	#NAME?	#NAME?	#NAME?	#NAME?	#NAME?	#NAME?	#NAME?	#NAME?	#NAME?	#NAME?	#NAME?
	12		0.149622	0.120228	0.186516	0.0169102	66.4248	377.525	#NAME?	#NAME?	#NAME?	#NAME?	#NAME?	#NAME?	#NAME?	#NAME?	#NAME?	#NAME?	#NAME?	#NAME?	#NAME?	#NAME?	#NAME?	#NAME?	#NAME?	#NAME?	#NAME?	#NAME?	#NAME?	#NAME?	#NAME?	#NAME?	#NAME?
	13		0.140768	0.111764	0.177597	0.0167941	60.227	367.618	#NAME?	#NAME?	#NAME?	#NAME?	#NAME?	#NAME?	#NAME?	#NAME?	#NAME?	#NAME?	#NAME?	#NAME?	#NAME?	#NAME?	#NAME?	#NAME?	#NAME?	#NAME?	#NAME?	#NAME?	#NAME?	#NAME?	#NAME?	#NAME?	#NAME?
	14		0.132438	0.103896	0.169104	0.0166348	54.8582	359.36	#NAME?	#NAME?	#NAME?	#NAME?	#NAME?	#NAME?	#NAME?	#NAME?	#NAME?	#NAME?	#NAME?	#NAME?	#NAME?	#NAME?	#NAME?	#NAME?	#NAME?	#NAME?	#NAME?	#NAME?	#NAME?	#NAME?	#NAME?	#NAME?	#NAME?
	15		0.124601	0.0965816	0.161018	0.0164378	50.1742	352.506	#NAME?	#NAME?	#NAME?	#NAME?	#NAME?	#NAME?	#NAME?	#NAME?	#NAME?	#NAME?	#NAME?	#NAME?	#NAME?	#NAME?	#NAME?	#NAME?	#NAME?	#NAME?	#NAME?	#NAME?	#NAME?	#NAME?	#NAME?	#NAME?	#NAME?
	16		0.117227	0.0897823	0.153318	0.0162081	46.0613	346.861	#NAME?	#NAME?	#NAME?	#NAME?	#NAME?	#NAME?	#NAME?	#NAME?	#NAME?	#NAME?	#NAME?	#NAME?	#NAME?	#NAME?	#NAME?	#NAME?	#NAME?	#NAME?	#NAME?	#NAME?	#NAME?	#NAME?	#NAME?	#NAME?	#NAME?
	17		0.11029	0.0834617	0.145987	0.0159503	42.4286	342.271	#NAME?	#NAME?	#NAME?	#NAME?	#NAME?	#NAME?	#NAME?	#NAME?	#NAME?	#NAME?	#NAME?	#NAME?	#NAME?	#NAME?	#NAME?	#NAME?	#NAME?	#NAME?	#NAME?	#NAME?	#NAME?	#NAME?	#NAME?	#NAME?	#NAME?
	18		0.103764	0.0775861	0.139006	0.0156683	39.2031	338.609	#NAME?	#NAME?	#NAME?	#NAME?	#NAME?	#NAME?	#NAME?	#NAME?	#NAME?	#NAME?	#NAME?	#NAME?	#NAME?	#NAME?	#NAME?	#NAME?	#NAME?	#NAME?	#NAME?	#NAME?	#NAME?	#NAME?	#NAME?	#NAME?	#NAME?
	19		0.0976231	0.0721241	0.132359	0.015366	36.3252	335.771	#NAME?	#NAME?	#NAME?	#NAME?	#NAME?	#NAME?	#NAME?	#NAME?	#NAME?	#NAME?	#NAME?	#NAME?	#NAME?	#NAME?	#NAME?	#NAME?	#NAME?	#NAME?	#NAME?	#NAME?	#NAME?	#NAME?	#NAME?	#NAME?	#NAME?
	20		0.0918461	0.0670466	0.126029	0.0150466	33.7459	333.672	#NAME?	#NAME?	#NAME?	#NAME?	#NAME?	#NAME?	#NAME?	#NAME?	#NAME?	#NAME?	#NAME?	#NAME?	#NAME?	#NAME?	#NAME?	#NAME?	#NAME?	#NAME?	#NAME?	#NAME?	#NAME?	#NAME?	#NAME?	#NAME?	#NAME?
	21		0.086411	0.0623266	0.120003	0.0147133	31.4249	332.243	#NAME?	#NAME?	#NAME?	#NAME?	#NAME?	#NAME?	#NAME?	#NAME?	#NAME?	#NAME?	#NAME?	#NAME?	#NAME?	#NAME?	#NAME?	#NAME?	#NAME?	#NAME?	#NAME?	#NAME?	#NAME?	#NAME?	#NAME?	#NAME?	#NAME?
	22		0.0812974	0.0579388	0.114264	0.0143688	29.3283	331.424	#NAME?	#NAME?	#NAME?	#NAME?	#NAME?	#NAME?	#NAME?	#NAME?	#NAME?	#NAME?	#NAME?	#NAME?	#NAME?	#NAME?	#NAME?	#NAME?	#NAME?	#NAME?	#NAME?	#NAME?	#NAME?	#NAME?	#NAME?	#NAME?	#NAME?
	23		0.0764865	0.05386	0.1088	0.0140154	27.4278	331.169	#NAME?	#NAME?	#NAME?	#NAME?	#NAME?	#NAME?	#NAME?	#NAME?	#NAME?	#NAME?	#NAME?	#NAME?	#NAME?	#NAME?	#NAME?	#NAME?	#NAME?	#NAME?	#NAME?	#NAME?	#NAME?	#NAME?	#NAME?	#NAME?	#NAME?
	24		0.0719603	0.0500683	0.103598	0.0136555	25.6995	331.435	#NAME?	#NAME?	#NAME?	#NAME?	#NAME?	#NAME?	#NAME?	#NAME?	#NAME?	#NAME?	#NAME?	#NAME?	#NAME?	#NAME?	#NAME?	#NAME?	#NAME?	#NAME?	#NAME?	#NAME?	#NAME?	#NAME?	#NAME?	#NAME?	#NAME?
	25		0.0677019	0.0465435	0.0986438	0.0132909	24.123	332.189	#NAME?	#NAME?	#NAME?	#NAME?	#NAME?	#NAME?	#NAME?	#NAME?	#NAME?	#NAME?	#NAME?	#NAME?	#NAME?	#NAME?	#NAME?	#NAME?	#NAME?	#NAME?	#NAME?	#NAME?	#NAME?	#NAME?	#NAME?	#NAME?	#NAME?
	26		0.0636955	0.0432669	0.0939268	0.0129234	22.6809	333.402	#NAME?	#NAME?	#NAME?	#NAME?	#NAME?	#NAME?	#NAME?	#NAME?	#NAME?	#NAME?	#NAME?	#NAME?	#NAME?	#NAME?	#NAME?	#NAME?	#NAME?	#NAME?	#NAME?	#NAME?	#NAME?	#NAME?	#NAME?	#NAME?	#NAME?
	27		0.0599262	0.040221	0.0894353	0.0125547	21.3583	335.052	#NAME?	#NAME?	#NAME?	#NAME?	#NAME?	#NAME?	#NAME?	#NAME?	#NAME?	#NAME?	#NAME?	#NAME?	#NAME?	#NAME?	#NAME?	#NAME?	#NAME?	#NAME?	#NAME?	#NAME?	#NAME?	#NAME?	#NAME?	#NAME?	#NAME?
	28		0.05638	0.0373894	0.0851586	0.012186	20.1423	337.118	#NAME?	#NAME?	#NAME?	#NAME?	#NAME?	#NAME?	#NAME?	#NAME?	#NAME?	#NAME?	#NAME?	#NAME?	#NAME?	#NAME?	#NAME?	#NAME?	#NAME?	#NAME?	#NAME?	#NAME?	#NAME?	#NAME?	#NAME?	#NAME?	#NAME?
	29		0.0530436	0.0347572	0.0810864	0.0118187	19.0217	339.583	#NAME?	#NAME?	#NAME?	#NAME?	#NAME?	#NAME?	#NAME?	#NAME?	#NAME?	#NAME?	#NAME?	#NAME?	#NAME?	#NAME?	#NAME?	#NAME?	#NAME?	#NAME?	#NAME?	#NAME?	#NAME?	#NAME?	#NAME?	#NAME?	#NAME?
	30		0.0499047	0.0323104	0.077209	0.0114537	17.9867	342.435	#NAME?	#NAME?	#NAME?	#NAME?	#NAME?	#NAME?	#NAME?	#NAME?	#NAME?	#NAME?	#NAME?	#NAME?	#NAME?	#NAME?	#NAME?	#NAME?	#NAME?	#NAME?	#NAME?	#NAME?	#NAME?	#NAME?	#NAME?	#NAME?	#NAME?
	31		0.0469515	0.0300357	0.0735169	0.0110921	17.0289	345.663	#NAME?	#NAME?	#NAME?	#NAME?	#NAME?	#NAME?	#NAME?	#NAME?	#NAME?	#NAME?	#NAME?	#NAME?	#NAME?	#NAME?	#NAME?	#NAME?	#NAME?	#NAME?	#NAME?	#NAME?	#NAME?	#NAME?	#NAME?	#NAME?	#NAME?
	32		0.044173	0.0279213	0.0700014	0.0107347	16.1407	349.257	#NAME?	#NAME?	#NAME?	#NAME?	#NAME?	#NAME?	#NAME?	#NAME?	#NAME?	#NAME?	#NAME?	#NAME?	#NAME?	#NAME?	#NAME?	#NAME?	#NAME?	#NAME?	#NAME?	#NAME?	#NAME?	#NAME?	#NAME?	#NAME?	#NAME?
	33		0.041559	0.0259556	0.066654	0.0103823	15.3157	353.212	#NAME?	#NAME?	#NAME?	#NAME?	#NAME?	#NAME?	#NAME?	#NAME?	#NAME?	#NAME?	#NAME?	#NAME?	#NAME?	#NAME?	#NAME?	#NAME?	#NAME?	#NAME?	#NAME?	#NAME?	#NAME?	#NAME?	#NAME?	#NAME?	#NAME?
	34		0.0390997	0.0241284	0.0634667	0.0100353	14.5478	357.523	#NAME?	#NAME?	#NAME?	#NAME?	#NAME?	#NAME?	#NAME?	#NAME?	#NAME?	#NAME?	#NAME?	#NAME?	#NAME?	#NAME?	#NAME?	#NAME?	#NAME?	#NAME?	#NAME?	#NAME?	#NAME?	#NAME?	#NAME?	#NAME?	#NAME?
	35		0.0367859	0.0224297	0.0604318	0.00969441	13.8321	362.186	#NAME?	#NAME?	#NAME?	#NAME?	#NAME?	#NAME?	#NAME?	#NAME?	#NAME?	#NAME?	#NAME?	#NAME?	#NAME?	#NAME?	#NAME?	#NAME?	#NAME?	#NAME?	#NAME?	#NAME?	#NAME?	#NAME?	#NAME?	#NAME?	#NAME?
	36		0.034609	0.0208507	0.057542	0.00936003	13.164	367.198	#NAME?	#NAME?	#NAME?	#NAME?	#NAME?	#NAME?	#NAME?	#NAME?	#NAME?	#NAME?	#NAME?	#NAME?	#NAME?	#NAME?	#NAME?	#NAME?	#NAME?	#NAME?	#NAME?	#NAME?	#NAME?	#NAME?	#NAME?	#NAME?	#NAME?
	37		0.032561	0.0193828	0.0547904	0.00903255	12.5392	372.561	#NAME?	#NAME?	#NAME?	#NAME?	#NAME?	#NAME?	#NAME?	#NAME?	#NAME?	#NAME?	#NAME?	#NAME?	#NAME?	#NAME?	#NAME?	#NAME?	#NAME?	#NAME?	#NAME?	#NAME?	#NAME?	#NAME?	#NAME?	#NAME?	#NAME?
	38		0.0306341	0.0180183	0.0521704	0.00871228	11.9543	378.274	#NAME?	#NAME?	#NAME?	#NAME?	#NAME?	#NAME?	#NAME?	#NAME?	#NAME?	#NAME?	#NAME?	#NAME?	#NAME?	#NAME?	#NAME?	#NAME?	#NAME?	#NAME?	#NAME?	#NAME?	#NAME?	#NAME?	#NAME?	#NAME?	#NAME?
	39		0.0288213	0.0167498	0.0496757	0.00839946	11.4059	384.338	#NAME?	#NAME?	#NAME?	#NAME?	#NAME?	#NAME?	#NAME?	#NAME?	#NAME?	#NAME?	#NAME?	#NAME?	#NAME?	#NAME?	#NAME?	#NAME?	#NAME?	#NAME?	#NAME?	#NAME?	#NAME?	#NAME?	#NAME?	#NAME?	#NAME?
	40		0.0271157	0.0155707	0.0473003	0.00809429	10.891	390.757	#NAME?	#NAME?	#NAME?	#NAME?	#NAME?	#NAME?	#NAME?	#NAME?	#NAME?	#NAME?	#NAME?	#NAME?	#NAME?	#NAME?	#NAME?	#NAME?	#NAME?	#NAME?	#NAME?	#NAME?	#NAME?	#NAME?	#NAME?	#NAME?	#NAME?
	41		0.0255111	0.0144745	0.0450384	0.00779692	10.407	397.534	#NAME?	#NAME?	#NAME?	#NAME?	#NAME?	#NAME?	#NAME?	#NAME?	#NAME?	#NAME?	#NAME?	#NAME?	#NAME?	#NAME?	#NAME?	#NAME?	#NAME?	#NAME?	#NAME?	#NAME?	#NAME?	#NAME?	#NAME?	#NAME?	#NAME?
	42		0.0240015	0.0134555	0.0428847	0.00750746	9.95159	404.673	#NAME?	#NAME?	#NAME?	#NAME?	#NAME?	#NAME?	#NAME?	#NAME?	#NAME?	#NAME?	#NAME?	#NAME?	#NAME?	#NAME?	#NAME?	#NAME?	#NAME?	#NAME?	#NAME?	#NAME?	#NAME?	#NAME?	#NAME?	#NAME?	#NAME?
	43		0.0225811	0.0125082	0.040834	0.00722596	9.52251	412.18	#NAME?	#NAME?	#NAME?	#NAME?	#NAME?	#NAME?	#NAME?	#NAME?	#NAME?	#NAME?	#NAME?	#NAME?	#NAME?	#NAME?	#NAME?	#NAME?	#NAME?	#NAME?	#NAME?	#NAME?	#NAME?	#NAME?	#NAME?	#NAME?	#NAME?
	44		0.0212448	0.0116277	0.0388814	0.00695248	9.11783	420.06	#NAME?	#NAME?	#NAME?	#NAME?	#NAME?	#NAME?	#NAME?	#NAME?	#NAME?	#NAME?	#NAME?	#NAME?	#NAME?	#NAME?	#NAME?	#NAME?	#NAME?	#NAME?	#NAME?	#NAME?	#NAME?	#NAME?	#NAME?	#NAME?	#NAME?
	45		0.0199876	0.0108091	0.0370221	0.006687	8.73575	428.322	#NAME?	#NAME?	#NAME?	#NAME?	#NAME?	#NAME?	#NAME?	#NAME?	#NAME?	#NAME?	#NAME?	#NAME?	#NAME?	#NAME?	#NAME?	#NAME?	#NAME?	#NAME?	#NAME?	#NAME?	#NAME?	#NAME?	#NAME?	#NAME?	#NAME?
	46		0.0188048	0.0100481	0.0352518	0.0064295	8.37465	436.971	#NAME?	#NAME?	#NAME?	#NAME?	#NAME?	#NAME?	#NAME?	#NAME?	#NAME?	#NAME?	#NAME?	#NAME?	#NAME?	#NAME?	#NAME?	#NAME?	#NAME?	#NAME?	#NAME?	#NAME?	#NAME?	#NAME?	#NAME?	#NAME?	#NAME?
	47		0.017692	0.00934076	0.0335661	0.00617992	8.03307	446.017	#NAME?	#NAME?	#NAME?	#NAME?	#NAME?	#NAME?	#NAME?	#NAME?	#NAME?	#NAME?	#NAME?	#NAME?	#NAME?	#NAME?	#NAME?	#NAME?	#NAME?	#NAME?	#NAME?	#NAME?	#NAME?	#NAME?	#NAME?	#NAME?	#NAME?
	48		0.0166451	0.00868318	0.031961	0.00593821	7.70963	455.468	#NAME?	#NAME?	#NAME?	#NAME?	#NAME?	#NAME?	#NAME?	#NAME?	#NAME?	#NAME?	#NAME?	#NAME?	#NAME?	#NAME?	#NAME?	#NAME?	#NAME?	#NAME?	#NAME?	#NAME?	#NAME?	#NAME?	#NAME?	#NAME?	#NAME?
	49		0.0156601	0.00807189	0.0304326	0.00570427	7.40312	465.335	#NAME?	#NAME?	#NAME?	#NAME?	#NAME?	#NAME?	#NAME?	#NAME?	#NAME?	#NAME?	#NAME?	#NAME?	#NAME?	#NAME?	#NAME?	#NAME?	#NAME?	#NAME?	#NAME?	#NAME?	#NAME?	#NAME?	#NAME?	#NAME?	#NAME?
	50		0.0147334	0.00750364	0.0289774	0.005478	7.11238	475.628	#NAME?	#NAME?	#NAME?	#NAME?	#NAME?	#NAME?	#NAME?	#NAME?	#NAME?	#NAME?	#NAME?	#NAME?	#NAME?	#NAME?	#NAME?	#NAME?	#NAME?	#NAME?	#NAME?	#NAME?	#NAME?	#NAME?	#NAME?	#NAME?	#NAME?
	51		0.0138615	0.00697539	0.0275917	0.00525927	6.8364	486.357	#NAME?	#NAME?	#NAME?	#NAME?	#NAME?	#NAME?	#NAME?	#NAME?	#NAME?	#NAME?	#NAME?	#NAME?	#NAME?	#NAME?	#NAME?	#NAME?	#NAME?	#NAME?	#NAME?	#NAME?	#NAME?	#NAME?	#NAME?	#NAME?	#NAME?
	52		0.0130412	0.00648433	0.0262723	0.00504796	6.5742	497.536	#NAME?	#NAME?	#NAME?	#NAME?	#NAME?	#NAME?	#NAME?	#NAME?	#NAME?	#NAME?	#NAME?	#NAME?	#NAME?	#NAME?	#NAME?	#NAME?	#NAME?	#NAME?	#NAME?	#NAME?	#NAME?	#NAME?	#NAME?	#NAME?	#NAME?
	53		0.0122695	0.00602784	0.025016	0.00484392	6.32492	509.175	#NAME?	#NAME?	#NAME?	#NAME?	#NAME?	#NAME?	#NAME?	#NAME?	#NAME?	#NAME?	#NAME?	#NAME?	#NAME?	#NAME?	#NAME?	#NAME?	#NAME?	#NAME?	#NAME?	#NAME?	#NAME?	#NAME?	#NAME?	#NAME?	#NAME?
	54		0.0115434	0.00560348	0.0238198	0.00464701	6.08773	521.29	#NAME?	#NAME?	#NAME?	#NAME?	#NAME?	#NAME?	#NAME?	#NAME?	#NAME?	#NAME?	#NAME?	#NAME?	#NAME?	#NAME?	#NAME?	#NAME?	#NAME?	#NAME?	#NAME?	#NAME?	#NAME?	#NAME?	#NAME?	#NAME?	#NAME?
	55		0.0108603	0.005209	0.0226807	0.00445707	5.8619	533.892	#NAME?	#NAME?	#NAME?	#NAME?	#NAME?	#NAME?	#NAME?	#NAME?	#NAME?	#NAME?	#NAME?	#NAME?	#NAME?	#NAME?	#NAME?	#NAME?	#NAME?	#NAME?	#NAME?	#NAME?	#NAME?	#NAME?	#NAME?	#NAME?	#NAME?
	56		0.0102176	0.00484229	0.0215962	0.00427395	5.64672	546.998	#NAME?	#NAME?	#NAME?	#NAME?	#NAME?	#NAME?	#NAME?	#NAME?	#NAME?	#NAME?	#NAME?	#NAME?	#NAME?	#NAME?	#NAME?	#NAME?	#NAME?	#NAME?	#NAME?	#NAME?	#NAME?	#NAME?	#NAME?	#NAME?	#NAME?
	57		0.00961298	0.0045014	0.0205635	0.00409746	5.44157	560.623	#NAME?	#NAME?	#NAME?	#NAME?	#NAME?	#NAME?	#NAME?	#NAME?	#NAME?	#NAME?	#NAME?	#NAME?	#NAME?	#NAME?	#NAME?	#NAME?	#NAME?	#NAME?	#NAME?	#NAME?	#NAME?	#NAME?	#NAME?	#NAME?	#NAME?
	58		0.00904412	0.0041845	0.0195801	0.00392746	5.24584	574.783	#NAME?	#NAME?	#NAME?	#NAME?	#NAME?	#NAME?	#NAME?	#NAME?	#NAME?	#NAME?	#NAME?	#NAME?	#NAME?	#NAME?	#NAME?	#NAME?	#NAME?	#NAME?	#NAME?	#NAME?	#NAME?	#NAME?	#NAME?	#NAME?	#NAME?
	59		0.00850891	0.00388992	0.0186438	0.00376376	5.059	589.494	#NAME?	#NAME?	#NAME?	#NAME?	#NAME?	#NAME?	#NAME?	#NAME?	#NAME?	#NAME?	#NAME?	#NAME?	#NAME?	#NAME?	#NAME?	#NAME?	#NAME?	#NAME?	#NAME?	#NAME?	#NAME?	#NAME?	#NAME?	#NAME?	#NAME?
	60		0.00800538	0.00361607	0.0177523	0.00360618	4.88052	604.774	#NAME?	#NAME?	#NAME?	#NAME?	#NAME?	#NAME?	#NAME?	#NAME?	#NAME?	#NAME?	#NAME?	#NAME?	#NAME?	#NAME?	#NAME?	#NAME?	#NAME?	#NAME?	#NAME?	#NAME?	#NAME?	#NAME?	#NAME?	#NAME?	#NAME?
	61		0.00753165	0.0033615	0.0169034	0.00345457	4.70994	620.643	#NAME?	#NAME?	#NAME?	#NAME?	#NAME?	#NAME?	#NAME?	#NAME?	#NAME?	#NAME?	#NAME?	#NAME?	#NAME?	#NAME?	#NAME?	#NAME?	#NAME?	#NAME?	#NAME?	#NAME?	#NAME?	#NAME?	#NAME?	#NAME?	#NAME?
	62		0.00708595	0.00312486	0.0160951	0.00330874	4.54681	637.118	#NAME?	#NAME?	#NAME?	#NAME?	#NAME?	#NAME?	#NAME?	#NAME?	#NAME?	#NAME?	#NAME?	#NAME?	#NAME?	#NAME?	#NAME?	#NAME?	#NAME?	#NAME?	#NAME?	#NAME?	#NAME?	#NAME?	#NAME?	#NAME?	#NAME?
	63		0.00666663	0.00290487	0.0153255	0.00316852	4.39072	654.221	#NAME?	#NAME?	#NAME?	#NAME?	#NAME?	#NAME?	#NAME?	#NAME?	#NAME?	#NAME?	#NAME?	#NAME?	#NAME?	#NAME?	#NAME?	#NAME?	#NAME?	#NAME?	#NAME?	#NAME?	#NAME?	#NAME?	#NAME?	#NAME?	#NAME?
	64		0.00627212	0.00270037	0.0145926	0.00303374	4.2413	671.973	#NAME?	#NAME?	#NAME?	#NAME?	#NAME?	#NAME?	#NAME?	#NAME?	#NAME?	#NAME?	#NAME?	#NAME?	#NAME?	#NAME?	#NAME?	#NAME?	#NAME?	#NAME?	#NAME?	#NAME?	#NAME?	#NAME?	#NAME?	#NAME?	#NAME?
	65		0.00590096	0.00251026	0.0138948	0.00290422	4.09817	690.394	#NAME?	#NAME?	#NAME?	#NAME?	#NAME?	#NAME?	#NAME?	#NAME?	#NAME?	#NAME?	#NAME?	#NAME?	#NAME?	#NAME?	#NAME?	#NAME?	#NAME?	#NAME?	#NAME?	#NAME?	#NAME?	#NAME?	#NAME?	#NAME?	#NAME?
	66		0.00555176	0.00233354	0.0132304	0.00277981	3.96101	709.509	#NAME?	#NAME?	#NAME?	#NAME?	#NAME?	#NAME?	#NAME?	#NAME?	#NAME?	#NAME?	#NAME?	#NAME?	#NAME?	#NAME?	#NAME?	#NAME?	#NAME?	#NAME?	#NAME?	#NAME?	#NAME?	#NAME?	#NAME?	#NAME?	#NAME?
	67		0.00522322	0.00216926	0.0125977	0.00266032	3.82951	729.34	#NAME?	#NAME?	#NAME?	#NAME?	#NAME?	#NAME?	#NAME?	#NAME?	#NAME?	#NAME?	#NAME?	#NAME?	#NAME?	#NAME?	#NAME?	#NAME?	#NAME?	#NAME?	#NAME?	#NAME?	#NAME?	#NAME?	#NAME?	#NAME?	#NAME?
	68		0.00491413	0.00201655	0.0119953	0.0025456	3.70337	749.913	#NAME?	#NAME?	#NAME?	#NAME?	#NAME?	#NAME?	#NAME?	#NAME?	#NAME?	#NAME?	#NAME?	#NAME?	#NAME?	#NAME?	#NAME?	#NAME?	#NAME?	#NAME?	#NAME?	#NAME?	#NAME?	#NAME?	#NAME?	#NAME?	#NAME?
	69		0.00462333	0.00187459	0.0114217	0.00243549	3.58231	771.252	#NAME?	#NAME?	#NAME?	#NAME?	#NAME?	#NAME?	#NAME?	#NAME?	#NAME?	#NAME?	#NAME?	#NAME?	#NAME?	#NAME?	#NAME?	#NAME?	#NAME?	#NAME?	#NAME?	#NAME?	#NAME?	#NAME?	#NAME?	#NAME?	#NAME?
	70		0.00434973	0.00174262	0.0108755	0.00232983	3.46609	793.386	#NAME?	#NAME?	#NAME?	#NAME?	#NAME?	#NAME?	#NAME?	#NAME?	#NAME?	#NAME?	#NAME?	#NAME?	#NAME?	#NAME?	#NAME?	#NAME?	#NAME?	#NAME?	#NAME?	#NAME?	#NAME?	#NAME?	#NAME?	#NAME?	#NAME?
	71		0.00409233	0.00161994	0.0103555	0.00222845	3.35447	816.341	#NAME?	#NAME?	#NAME?	#NAME?	#NAME?	#NAME?	#NAME?	#NAME?	#NAME?	#NAME?	#NAME?	#NAME?	#NAME?	#NAME?	#NAME?	#NAME?	#NAME?	#NAME?	#NAME?	#NAME?	#NAME?	#NAME?	#NAME?	#NAME?	#NAME?
	72		0.00385016	0.0015059	0.00986029	0.00213122	3.2472	840.147	#NAME?	#NAME?	#NAME?	#NAME?	#NAME?	#NAME?	#NAME?	#NAME?	#NAME?	#NAME?	#NAME?	#NAME?	#NAME?	#NAME?	#NAME?	#NAME?	#NAME?	#NAME?	#NAME?	#NAME?	#NAME?	#NAME?	#NAME?	#NAME?	#NAME?
	73		0.00362232	0.00139988	0.00938878	0.00203799	3.14409	864.834	#NAME?	#NAME?	#NAME?	#NAME?	#NAME?	#NAME?	#NAME?	#NAME?	#NAME?	#NAME?	#NAME?	#NAME?	#NAME?	#NAME?	#NAME?	#NAME?	#NAME?	#NAME?	#NAME?	#NAME?	#NAME?	#NAME?	#NAME?	#NAME?	#NAME?
	74		0.00340796	0.00130133	0.00893982	0.00194859	3.04494	890.432	#NAME?	#NAME?	#NAME?	#NAME?	#NAME?	#NAME?	#NAME?	#NAME?	#NAME?	#NAME?	#NAME?	#NAME?	#NAME?	#NAME?	#NAME?	#NAME?	#NAME?	#NAME?	#NAME?	#NAME?	#NAME?	#NAME?	#NAME?	#NAME?	#NAME?
	75		0.00320629	0.00120972	0.00851233	0.00186291	2.94954	916.974	#NAME?	#NAME?	#NAME?	#NAME?	#NAME?	#NAME?	#NAME?	#NAME?	#NAME?	#NAME?	#NAME?	#NAME?	#NAME?	#NAME?	#NAME?	#NAME?	#NAME?	#NAME?	#NAME?	#NAME?	#NAME?	#NAME?	#NAME?	#NAME?	#NAME?
	76		0.00301655	0.00112456	0.00810528	0.0017808	2.85774	944.495	#NAME?	#NAME?	#NAME?	#NAME?	#NAME?	#NAME?	#NAME?	#NAME?	#NAME?	#NAME?	#NAME?	#NAME?	#NAME?	#NAME?	#NAME?	#NAME?	#NAME?	#NAME?	#NAME?	#NAME?	#NAME?	#NAME?	#NAME?	#NAME?	#NAME?
	77		0.00283804	0.00104539	0.0077177	0.00170212	2.76935	973.028	#NAME?	#NAME?	#NAME?	#NAME?	#NAME?	#NAME?	#NAME?	#NAME?	#NAME?	#NAME?	#NAME?	#NAME?	#NAME?	#NAME?	#NAME?	#NAME?	#NAME?	#NAME?	#NAME?	#NAME?	#NAME?	#NAME?	#NAME?	#NAME?	#NAME?
	78		0.0026701	0.000971794	0.00734864	0.00162675	2.68423	1002.61	#NAME?	#NAME?	#NAME?	#NAME?	#NAME?	#NAME?	#NAME?	#NAME?	#NAME?	#NAME?	#NAME?	#NAME?	#NAME?	#NAME?	#NAME?	#NAME?	#NAME?	#NAME?	#NAME?	#NAME?	#NAME?	#NAME?	#NAME?	#NAME?	#NAME?
	79		0.00251209	0.00090338	0.00699724	0.00155456	2.60223	1033.28	#NAME?	#NAME?	#NAME?	#NAME?	#NAME?	#NAME?	#NAME?	#NAME?	#NAME?	#NAME?	#NAME?	#NAME?	#NAME?	#NAME?	#NAME?	#NAME?	#NAME?	#NAME?	#NAME?	#NAME?	#NAME?	#NAME?	#NAME?	#NAME?	#NAME?
	80		0.00236343	0.000839783	0.00666264	0.00148542	2.5232	1065.08	#NAME?	#NAME?	#NAME?	#NAME?	#NAME?	#NAME?	#NAME?	#NAME?	#NAME?	#NAME?	#NAME?	#NAME?	#NAME?	#NAME?	#NAME?	#NAME?	#NAME?	#NAME?	#NAME?	#NAME?	#NAME?	#NAME?	#NAME?	#NAME?	#NAME?
	81		0.00222357	0.000780663	0.00634404	0.00141923	2.44701	1098.04	#NAME?	#NAME?	#NAME?	#NAME?	#NAME?	#NAME?	#NAME?	#NAME?	#NAME?	#NAME?	#NAME?	#NAME?	#NAME?	#NAME?	#NAME?	#NAME?	#NAME?	#NAME?	#NAME?	#NAME?	#NAME?	#NAME?	#NAME?	#NAME?	#NAME?
	82		0.00209199	0.000725705	0.00604067	0.00135586	2.37354	1132.21	#NAME?	#NAME?	#NAME?	#NAME?	#NAME?	#NAME?	#NAME?	#NAME?	#NAME?	#NAME?	#NAME?	#NAME?	#NAME?	#NAME?	#NAME?	#NAME?	#NAME?	#NAME?	#NAME?	#NAME?	#NAME?	#NAME?	#NAME?	#NAME?	#NAME?
	83		0.00196819	0.000674616	0.00575182	0.0012952	2.30267	1167.64	#NAME?	#NAME?	#NAME?	#NAME?	#NAME?	#NAME?	#NAME?	#NAME?	#NAME?	#NAME?	#NAME?	#NAME?	#NAME?	#NAME?	#NAME?	#NAME?	#NAME?	#NAME?	#NAME?	#NAME?	#NAME?	#NAME?	#NAME?	#NAME?	#NAME?
	84		0.00185172	0.000627123	0.00547677	0.00123716	2.23428	1204.36	#NAME?	#NAME?	#NAME?	#NAME?	#NAME?	#NAME?	#NAME?	#NAME?	#NAME?	#NAME?	#NAME?	#NAME?	#NAME?	#NAME?	#NAME?	#NAME?	#NAME?	#NAME?	#NAME?	#NAME?	#NAME?	#NAME?	#NAME?	#NAME?	#NAME?
	85		0.00174214	0.000582974	0.00521488	0.00118161	2.16827	1242.43	#NAME?	#NAME?	#NAME?	#NAME?	#NAME?	#NAME?	#NAME?	#NAME?	#NAME?	#NAME?	#NAME?	#NAME?	#NAME?	#NAME?	#NAME?	#NAME?	#NAME?	#NAME?	#NAME?	#NAME?	#NAME?	#NAME?	#NAME?	#NAME?	#NAME?
	86		0.00163905	0.000541934	0.00496551	0.00112846	2.10454	1281.9	#NAME?	#NAME?	#NAME?	#NAME?	#NAME?	#NAME?	#NAME?	#NAME?	#NAME?	#NAME?	#NAME?	#NAME?	#NAME?	#NAME?	#NAME?	#NAME?	#NAME?	#NAME?	#NAME?	#NAME?	#NAME?	#NAME?	#NAME?	#NAME?	#NAME?
	87		0.00154205	0.000503782	0.00472806	0.00107762	2.04299	1322.81	#NAME?	#NAME?	#NAME?	#NAME?	#NAME?	#NAME?	#NAME?	#NAME?	#NAME?	#NAME?	#NAME?	#NAME?	#NAME?	#NAME?	#NAME?	#NAME?	#NAME?	#NAME?	#NAME?	#NAME?	#NAME?	#NAME?	#NAME?	#NAME?	#NAME?
	88		0.0014508	0.000468316	0.00450197	0.00102899	1.98354	1365.22	#NAME?	#NAME?	#NAME?	#NAME?	#NAME?	#NAME?	#NAME?	#NAME?	#NAME?	#NAME?	#NAME?	#NAME?	#NAME?	#NAME?	#NAME?	#NAME?	#NAME?	#NAME?	#NAME?	#NAME?	#NAME?	#NAME?	#NAME?	#NAME?	#NAME?
	89		0.00136495	0.000435347	0.00428669	0.000982486	1.92609	1409.19	#NAME?	#NAME?	#NAME?	#NAME?	#NAME?	#NAME?	#NAME?	#NAME?	#NAME?	#NAME?	#NAME?	#NAME?	#NAME?	#NAME?	#NAME?	#NAME?	#NAME?	#NAME?	#NAME?	#NAME?	#NAME?	#NAME?	#NAME?	#NAME?	#NAME?
	90		0.00128417	0.000404699	0.00408171	0.000938013	1.87057	1454.76	#NAME?	#NAME?	#NAME?	#NAME?	#NAME?	#NAME?	#NAME?	#NAME?	#NAME?	#NAME?	#NAME?	#NAME?	#NAME?	#NAME?	#NAME?	#NAME?	#NAME?	#NAME?	#NAME?	#NAME?	#NAME?	#NAME?	#NAME?	#NAME?	#NAME?
	91		0.00120818	0.000376208	0.00388653	0.000895489	1.81689	1502.01	#NAME?	#NAME?	#NAME?	#NAME?	#NAME?	#NAME?	#NAME?	#NAME?	#NAME?	#NAME?	#NAME?	#NAME?	#NAME?	#NAME?	#NAME?	#NAME?	#NAME?	#NAME?	#NAME?	#NAME?	#NAME?	#NAME?	#NAME?	#NAME?	#NAME?
	92		0.00113668	0.000349724	0.00370068	0.000854835	1.76498	1550.98	#NAME?	#NAME?	#NAME?	#NAME?	#NAME?	#NAME?	#NAME?	#NAME?	#NAME?	#NAME?	#NAME?	#NAME?	#NAME?	#NAME?	#NAME?	#NAME?	#NAME?	#NAME?	#NAME?	#NAME?	#NAME?	#NAME?	#NAME?	#NAME?	#NAME?
	93		0.00106942	0.000325103	0.00352371	0.000815972	1.71478	1601.76	#NAME?	#NAME?	#NAME?	#NAME?	#NAME?	#NAME?	#NAME?	#NAME?	#NAME?	#NAME?	#NAME?	#NAME?	#NAME?	#NAME?	#NAME?	#NAME?	#NAME?	#NAME?	#NAME?	#NAME?	#NAME?	#NAME?	#NAME?	#NAME?	#NAME?
	94		0.00100613	0.000302216	0.00335521	0.000778826	1.66621	1654.39	#NAME?	#NAME?	#NAME?	#NAME?	#NAME?	#NAME?	#NAME?	#NAME?	#NAME?	#NAME?	#NAME?	#NAME?	#NAME?	#NAME?	#NAME?	#NAME?	#NAME?	#NAME?	#NAME?	#NAME?	#NAME?	#NAME?	#NAME?	#NAME?	#NAME?
	95		0.000946593	0.000280941	0.00319477	0.000743324	1.61922	1708.95	#NAME?	#NAME?	#NAME?	#NAME?	#NAME?	#NAME?	#NAME?	#NAME?	#NAME?	#NAME?	#NAME?	#NAME?	#NAME?	#NAME?	#NAME?	#NAME?	#NAME?	#NAME?	#NAME?	#NAME?	#NAME?	#NAME?	#NAME?	#NAME?	#NAME?
	96		0.000890577	0.000261163	0.003042	0.000709398	1.57373	1765.52	#NAME?	#NAME?	#NAME?	#NAME?	#NAME?	#NAME?	#NAME?	#NAME?	#NAME?	#NAME?	#NAME?	#NAME?	#NAME?	#NAME?	#NAME?	#NAME?	#NAME?	#NAME?	#NAME?	#NAME?	#NAME?	#NAME?	#NAME?	#NAME?	#NAME?
	97		0.000837876	0.000242777	0.00289654	0.000676979	1.5297	1824.16	#NAME?	#NAME?	#NAME?	#NAME?	#NAME?	#NAME?	#NAME?	#NAME?	#NAME?	#NAME?	#NAME?	#NAME?	#NAME?	#NAME?	#NAME?	#NAME?	#NAME?	#NAME?	#NAME?	#NAME?	#NAME?	#NAME?	#NAME?	#NAME?	#NAME?
	98		0.000788293	0.000225686	0.00275803	0.000646006	1.48707	1884.95	#NAME?	#NAME?	#NAME?	#NAME?	#NAME?	#NAME?	#NAME?	#NAME?	#NAME?	#NAME?	#NAME?	#NAME?	#NAME?	#NAME?	#NAME?	#NAME?	#NAME?	#NAME?	#NAME?	#NAME?	#NAME?	#NAME?	#NAME?	#NAME?	#NAME?
	99		0.000741644	0.000209798	0.00262614	0.000616414	1.44578	1947.97	#NAME?	#NAME?	#NAME?	#NAME?	#NAME?	#NAME?	#NAME?	#NAME?	#NAME?	#NAME?	#NAME?	#NAME?	#NAME?	#NAME?	#NAME?	#NAME?	#NAME?	#NAME?	#NAME?	#NAME?	#NAME?	#NAME?	#NAME?	#NAME?	#NAME?
	100		0.000697756	0.000195028	0.00250056	0.000588147	1.40578	2013.31	#NAME?	#NAME?	#NAME?	#NAME?	#NAME?	#NAME?	#NAME?	#NAME?	#NAME?	#NAME?	#NAME?	#NAME?	#NAME?	#NAME?	#NAME?	#NAME?	#NAME?	#NAME?	#NAME?	#NAME?	#NAME?	#NAME?	#NAME?	#NAME?	#NAME?
	101		0.000656465	0.000181298	0.00238099	0.000561145	1.36703	2081.05	#NAME?	#NAME?	#NAME?	#NAME?	#NAME?	#NAME?	#NAME?	#NAME?	#NAME?	#NAME?	#NAME?	#NAME?	#NAME?	#NAME?	#NAME?	#NAME?	#NAME?	#NAME?	#NAME?	#NAME?	#NAME?	#NAME?	#NAME?	#NAME?	#NAME?
	102		0.000617618	0.000168535	0.00226713	0.000535356	1.32948	2151.27	#NAME?	#NAME?	#NAME?	#NAME?	#NAME?	#NAME?	#NAME?	#NAME?	#NAME?	#NAME?	#NAME?	#NAME?	#NAME?	#NAME?	#NAME?	#NAME?	#NAME?	#NAME?	#NAME?	#NAME?	#NAME?	#NAME?	#NAME?	#NAME?	#NAME?
	103		0.000581069	0.00015667	0.00215872	0.000510727	1.29309	2224.08	#NAME?	#NAME?	#NAME?	#NAME?	#NAME?	#NAME?	#NAME?	#NAME?	#NAME?	#NAME?	#NAME?	#NAME?	#NAME?	#NAME?	#NAME?	#NAME?	#NAME?	#NAME?	#NAME?	#NAME?	#NAME?	#NAME?	#NAME?	#NAME?	#NAME?
	104		0.000546683	0.000145641	0.00205549	0.000487207	1.25782	2299.56	#NAME?	#NAME?			0	#NAME?			0	#NAME?			0	#NAME?			0	#NAME?			0	#NAME?			0
	YLD										#NAME?	#NAME?	#NAME?		#NAME?	#NAME?	#NAME?		#NAME?	#NAME?	#NAME?		#NAME?	#NAME?	#NAME?		#NAME?	#NAME?	#NAME?		#NAME?	#NAME?	#NAME?
PICS
			SCENARIO 3A												SCENARIO 3B												SCENARIO 3C
			Scenario 3A_V (Vaccinated)						Scenario 3A_U (Unvaccinated)						Scenario 3B (Vaccinated)						Scenario 3B_U (Unvaccinated)						Scenario 3C (Vaccinated)						Scenario 3C_U (Unvaccinated)
			COVID INCIDENCE	PICS INCIDENCE	LE tables (Yrs)	Duration (days)	Incidence-per year	DALYS	COVID INCIDENCE	PICS INCIDENCE	LE tables (Yrs)	Duration (days)	Incidence-per year	DALYS	COVID INCIDENCE	PICS INCIDENCE	LE tables (Yrs)	Duration (days)	Incidence-per year	DALYS	COVID INCIDENCE	PICS INCIDENCE	LE tables (Yrs)	Duration (days)	Incidence-per year	DALYS	COVID INCIDENCE	PICS INCIDENCE	LE tables (Yrs)	Duration (days)	Incidence-per year	DALYS	COVID INCIDENCE	PICS INCIDENCE	LE tables (Yrs)	Duration (days)	Incidence-per year	DALYS
	60-69		165.938	150.34	21.403	7803.43	3211.95	#NAME?	183.674	166.408	21.403	7803.43	3555.25	#NAME?	296.161	268.322	21.403	7803.43	5732.61	#NAME?	327.26	296.497	21.403	7803.43	6334.55	#NAME?	349.368	316.528	21.403	7803.43	6762.5	#NAME?	382.167	346.244	21.403	7803.43	7397.36	#NAME?
	70-79		75.9715	68.8302	13.4485	4898.07	923.025	#NAME?	84.0915	76.1869	13.4485	4898.07	1021.68	#NAME?	135.592	122.846	13.4485	4898.07	1647.39	#NAME?	149.83	135.746	13.4485	4898.07	1820.37	#NAME?	159.952	144.916	13.4485	4898.07	1943.35	#NAME?	174.968	158.521	13.4485	4898.07	2125.8	#NAME?
	80-89		17.9933	16.3019	7.10454	2580.93	115.193	#NAME?	19.9164	18.0443	7.10454	2580.93	127.504	#NAME?	32.1139	29.0952	7.10454	2580.93	205.593	#NAME?	35.486	32.1503	7.10454	2580.93	227.181	#NAME?	37.8833	34.3223	7.10454	2580.93	242.528	#NAME?	41.4398	37.5445	7.10454	2580.93	265.297	#NAME?
	90+		0	0	3.45069	1246.36	0	#NAME?	0	0	3.45069	1246.36	0	#NAME?	0	0	3.45069	1246.36	0	#NAME?	0	0	3.45069	1246.36	0	#NAME?	0	0	3.45069	1246.36	0	#NAME?	0	0	3.45069	1246.36	0	#NAME?
	TOTAL		259.903	235.472			4250.17	#NAME?	287.681	260.639			4704.43	#NAME?	463.867	420.264			7585.59	#NAME?	512.575	464.393			8382.11	#NAME?	547.204	495.766			8948.38	#NAME?	598.575	542.309			9788.46	#NAME?
Permanent
					SCENARIO 3A				SCENARIO 3B				SCENARIO 3C
					Scenario 3A (Vaccinated)		Scenario 3A (UNVaccinated)		Scenario 3B (Vaccinated)		Scenario 3B (UNVaccinated)		Scenario 3C (Vaccinated)		Scenario 3C (UNVaccinated)
			IHME 2019		COVID-19 consequences		COVID-19 consequences		COVID-19 consequences		COVID-19 consequences		COVID-19 consequences		COVID-19 consequences
					Base		Base		Base		Base		Base		Base
			Incidence Base	DALYS Base	Incidence	DALYS	Incidence	DALYS	Incidence	DALYS	Incidence	DALYS	Incidence	DALYS	Incidence	DALYS
1	Diabetes	587	69042.8	186528	#NAME?	#NAME?	#NAME?	#NAME?	#NAME?	#NAME?	#NAME?	#NAME?	#NAME?	#NAME?	#NAME?	#NAME?
2	Parkinsons	544	6598.01	38742.5	#NAME?	#NAME?	#NAME?	#NAME?	#NAME?	#NAME?	#NAME?	#NAME?	#NAME?	#NAME?	#NAME?	#NAME?
3	Dementia	543	43968.6	154293	#NAME?	#NAME?	#NAME?	#NAME?	#NAME?	#NAME?	#NAME?	#NAME?	#NAME?	#NAME?	#NAME?	#NAME?
4	Anxiety disorders	571	188750	139108	#NAME?	#NAME?	#NAME?	#NAME?	#NAME?	#NAME?	#NAME?	#NAME?	#NAME?	#NAME?	#NAME?	#NAME?
5	Ischemic Stroke	495	17984.1	114238	#NAME?	#NAME?	#NAME?	#NAME?	#NAME?	#NAME?	#NAME?	#NAME?	#NAME?	#NAME?	#NAME?	#NAME?
	Total with Diabetes					#NAME?		#NAME?		#NAME?		#NAME?		#NAME?		#NAME?
	Total without Diabetes					#NAME?		#NAME?		#NAME?		#NAME?		#NAME?		#NAME?
DALYS
			Scenario 3A_V (Vaccinated)							Scenario 3A_U (Unvaccinated)							Scenario 3B_V (Vaccinated)							Scenario 3B_U (Unvaccinated)							Scenario 3C_V (Vaccinated)							Scenario 3C_U (Unvaccinated)
			TOTAL DALYS				ERRUNOUTPUT			TOTAL DALYS				ERRUNOUTPUT			TOTAL DALYS				ERRUNOUTPUT			TOTAL DALYS				ERRUNOUTPUT			TOTAL DALYS				ERRUNOUTPUT			TOTAL DALYS				ERRUNOUTPUT
			YLL	YLD (Base)	DALYS	DALYS per 100,000 population				YLL	YLD (Base)	DALYS	DALYS per 100,000 population				YLL	YLD (Base)	DALYS	DALYS per 100,000 population				YLL	YLD (Base)	DALYS	DALYS per 100,000 population				YLL	YLD (Base)	DALYS	DALYS per 100,000 population				YLL	YLD (Base)	DALYS	DALYS per 100,000 population
	YLL_3AV		13855.4				#NAME?		YLL_3AU	29036.9				#NAME?		YLL_3BV	21801.2				#NAME?		YLL_3BU	45043.2				#NAME?		YLL_3CV	23878.9				#NAME?		YLL_3CU	46275.2				#NAME?
	YLD_Acute_3AV			#NAME?			#NAME?		YLD_Acute_3AU		#NAME?			#NAME?		YLD_Acute_3BV		#NAME?			#NAME?		YLD_Acute_3BU		#NAME?			#NAME?		YLD_Acute_3CV		#NAME?			#NAME?		YLD_Acute_3CU		#NAME?			#NAME?
	YLD_Chronic_3AV			#NAME?			#NAME?		YLD_Chronic_3AU		#NAME?			#NAME?		YLD_Chronic_3BV		#NAME?			#NAME?		YLD_Chronic_3BU		#NAME?			#NAME?		YLD_Chronic_3CV		#NAME?			#NAME?		YLD_Chronic_3CU		#NAME?			#NAME?
	YLD_PICS_3AV			#NAME?			#NAME?		YLD_PICS_3AU		#NAME?			#NAME?		YLD_PICS_3BV		#NAME?			#NAME?		YLD_PICS_3BU		#NAME?			#NAME?		YLD_PICS_3CV		#NAME?			#NAME?		YLD_PICS_3CU		#NAME?			#NAME?
	DALY_Perm_Diab_3AV			#NAME?			#NAME?		DALY_Perm_Diab_3AU		#NAME?			#NAME?		DALY_Perm_Diab_3BV		#NAME?			#NAME?		DALY_Perm_Diab_3BU		#NAME?			#NAME?		DALY_Perm_Diab_3CV		#NAME?			#NAME?		DALY_Perm_Diab_3CU		#NAME?			#NAME?
	DALY_Perm_WoDiab_3AV			#NAME?			#NAME?		DALY_Perm_WoDiab_3AU		#NAME?			#NAME?		DALY_Perm_WoDiab_3BV		#NAME?			#NAME?		DALY_Perm_WoDiab_3BU		#NAME?			#NAME?		DALY_Perm_WoDiab_3CV		#NAME?			#NAME?		DALY_Perm_WoDiab_3CU		#NAME?			#NAME?
	TOTAL YLD Baseline_3AV			#NAME?		#NAME?	#NAME?		TOTAL YLD Baseline_3AU		#NAME?		#NAME?	#NAME?		TOTAL YLD Baseline_3BV		#NAME?		#NAME?	#NAME?		TOTAL YLD Baseline_3BU		#NAME?		#NAME?	#NAME?		TOTAL YLD Baseline_3CV		#NAME?		#NAME?	#NAME?		TOTAL YLD Baseline_3CU		#NAME?		#NAME?	#NAME?
	TOTAL YLD with Diabetes_3AV			#NAME?		#NAME?	#NAME?		TOTAL YLD with Diabetes_3AU		#NAME?		#NAME?	#NAME?		TOTAL YLD with Diabetes_3BV		#NAME?		#NAME?	#NAME?		TOTAL YLD with Diabetes_3BU		#NAME?		#NAME?	#NAME?		TOTAL YLD with Diabetes_3CV		#NAME?		#NAME?	#NAME?		TOTAL YLD with Diabetes_3CU		#NAME?		#NAME?	#NAME?
	TOTAL YLD without Diabetes_3AV			#NAME?		#NAME?	#NAME?		TOTAL YLD without Diabetes_3AU		#NAME?		#NAME?	#NAME?		TOTAL YLD without Diabetes_3BV		#NAME?		#NAME?	#NAME?		TOTAL YLD without Diabetes_3BU		#NAME?		#NAME?	#NAME?		TOTAL YLD without Diabetes_3CV		#NAME?		#NAME?	#NAME?		TOTAL YLD without Diabetes_3CU		#NAME?		#NAME?	#NAME?
	TOTAL DALYS Baseline_3AV				#NAME?	#NAME?	#NAME?		TOTAL DALYS Baseline_3AU			#NAME?	#NAME?	#NAME?		TOTAL DALYS Baseline_3BV			#NAME?	#NAME?	#NAME?		TOTAL DALYS Baseline_3BU			#NAME?	#NAME?	#NAME?		TOTAL DALYS Baseline_3CV			#NAME?	#NAME?	#NAME?		TOTAL DALYS Baseline_3CU			#NAME?	#NAME?	#NAME?
	Total DALY_D_3AV				#NAME?	#NAME?	#NAME?		Total DALY_D_3AU			#NAME?	#NAME?	#NAME?		Total DALY_D_3BV			#NAME?	#NAME?	#NAME?		Total DALY_D_3BU			#NAME?	#NAME?	#NAME?		Total DALY_D_3CV			#NAME?	#NAME?	#NAME?		Total DALY_D_3CU			#NAME?	#NAME?	#NAME?
	Total DALYS_WoD_3AV				#NAME?	#NAME?	#NAME?		Total DALYS_WoD_3AU			#NAME?	#NAME?	#NAME?		Total DALYS_WoD_3BV			#NAME?	#NAME?	#NAME?		Total DALYS_WoD_3BU			#NAME?	#NAME?	#NAME?		Total DALYS_WoD_3CV			#NAME?	#NAME?	#NAME?		Total DALYS_WoD_3CU			#NAME?	#NAME?	#NAME?
			Scenario 3A_Combined													Scenario 3B_Combined														Scenario IC_Combined
			TOTAL DALYS				ERRUNOUTPUT										TOTAL DALYS				ERRUNOUTPUT										TOTAL DALYS				ERRUNOUTPUT
			YLL	YLD (Base)	DALYS	DALYS per 100,000 population											YLL	YLD (Base)	DALYS	DALYS per 100,000 population											YLL	YLD (Base)	DALYS	DALYS per 100,000 population
	YLL_3A_Combined		#NAME?				#NAME?									YLL_3B_Combined	#NAME?				#NAME?									YLL_3C_Combined	#NAME?				#NAME?
	YLD_Acute_3A_Combined			#NAME?			#NAME?									YLD_Acute_3B_Combined		#NAME?			#NAME?									YLD_Acute_3C_Combined		#NAME?			#NAME?
	YLD_Chronic_3A_Combined			#NAME?			#NAME?									YLD_Chronic_3B_Combined		#NAME?			#NAME?									YLD_Chronic_3C_Combined		#NAME?			#NAME?
	YLD_PICS_3A_Combined			#NAME?			#NAME?									YLD_PICS_3B_Combined		#NAME?			#NAME?									YLD_PICS_3C_Combined		#NAME?			#NAME?
	DALY_Perm_Diab_3A_Combined			#NAME?			#NAME?									DALY_Perm_Diab_3B_Combined		#NAME?			#NAME?									DALY_Perm_Diab_3C_Combined		#NAME?			#NAME?
	DALY_Perm_WoDiab_3A_Combined			#NAME?			#NAME?									DALY_Perm_WoDiab_3B_Combined		#NAME?			#NAME?									DALY_Perm_WoDiab_3C_Combined		#NAME?			#NAME?
	TOTAL YLD Baseline_3A_Combined			#NAME?		#NAME?	#NAME?									TOTAL YLD Baseline_3B_Combined		#NAME?		#NAME?	#NAME?									TOTAL YLD Baseline_3C_Combined		#NAME?		#NAME?	#NAME?
	TOTAL YLD with Diabetes_3A_Combined			#NAME?		#NAME?	#NAME?									TOTAL YLD with Diabetes_3B_Combined		#NAME?		#NAME?	#NAME?									TOTAL YLD with Diabetes_3C_Combined		#NAME?		#NAME?	#NAME?
	TOTAL YLD without Diabetes_3A_Combined			#NAME?		#NAME?	#NAME?									TOTAL YLD without Diabetes_3B_Combined		#NAME?		#NAME?	#NAME?									TOTAL YLD without Diabetes_3C_Combined		#NAME?		#NAME?	#NAME?
	TOTAL DALYS Baseline_3A_Combined				#NAME?	#NAME?	#NAME?									TOTAL DALYS Baseline_3B_Combined			#NAME?	#NAME?	#NAME?									TOTAL DALYS Baseline_3C_Combined			#NAME?	#NAME?	#NAME?
	Total DALY_D_3A_Combined				#NAME?	#NAME?	#NAME?									Total DALY_D_3B_Combined			#NAME?	#NAME?	#NAME?									Total DALY_D_3C_Combined			#NAME?	#NAME?	#NAME?
	Total DALYS_WoD_3A_Combined				#NAME?	#NAME?	#NAME?									Total DALYS_WoD_3B_Combined			#NAME?	#NAME?	#NAME?									Total DALYS_WoD_3C_Combined			#NAME?	#NAME?	#NAME?

## Sheet: Scenario 4
DALYS Calculation (Scenario 4: 80% and low, medium or high seeding infections assuming baseline PHSMs and optimal TTIQ)
Back to "read me"
Mortality (YLL)
				DEATH						YLL
	Age	Mid	LETotals	Scenario 4A_V (Vaccinated)	Scenario 4A_U (Unvaccinated)	Scenario 4B_V (Vaccinated)	Scenario 4B_U (Unvaccinated)	Scenario 4C_V (Vaccinated)	Scenario 4C_U (Unvaccinated)	Scenario 4A_V (Vaccinated)	Scenario 4A_U (Unvaccinated)	Scenario 4B_V (Vaccinated)	Scenario 4B_U (Unvaccinated)	Scenario 4C_V (Vaccinated)	Scenario 4C_U (Unvaccinated)
	0-9	5	78.2138	0	0	0	0	0	0	0	0	0	0	0	0
	10-19	15	68.2659	0.00612089	0.0145371	0.0879878	0.198164	0.394797	0.889059	0.417848	0.992388	6.00656	13.5278	26.9512	60.6924
	20-29	25	58.5115	0.0428462	0.10176	0.615914	1.38715	2.76358	6.22341	2.507	5.95412	36.0381	81.1641	161.701	364.141
	30-39	35	48.8546	0.055088	0.130834	0.79189	1.78347	3.55318	8.00153	2.6913	6.39184	38.6874	87.1308	173.589	390.911
	40-49	45	39.3018	0.128539	0.305279	1.84774	4.16144	8.29074	18.6702	5.05179	11.998	72.6195	163.552	325.841	733.773
	50-59	55	30.0933	0.336649	0.799541	4.83933	10.899	21.7138	48.8982	10.1309	24.0608	145.631	327.987	653.441	1471.51
	60-69	65	21.403	0.575363	1.36649	8.27085	18.6274	37.1109	83.5715	12.3145	29.2469	177.021	398.681	794.284	1788.68
	70-79	75	13.4485	1.54246	3.66335	22.1729	49.9373	99.4889	224.043	20.7438	49.2666	298.192	671.581	1337.98	3013.04
	80-89	85	7.10454	3.10329	7.37031	44.6098	100.469	200.162	450.753	22.0474	52.3627	316.932	713.786	1422.06	3202.39
	90-100	95	3.45069	2.20964	5.2479	31.7636	71.5371	142.522	320.95	7.62477	18.1088	109.606	246.852	491.798	1107.5
	weighted mean/Total			8	19	115	259	516	1162	83.5293	198.382	1200.73	2704.26	5387.64	12132.6
Morbidity (YLD)
PARAMETERS
AUSTALIAN POPULATION			Scenario 4A_V (Vaccinated)	Scenario 4A_U (Unvaccinated)	Scenario 4B_V (Vaccinated)	Scenario 4B_U (Unvaccinated)	Scenario 4C_V (Vaccinated)	Scenario 4C_U (Unvaccinated)			Scenario 4A_V (Vaccinated)	Scenario 4A_U (Unvaccinated)	Scenario 4B_V (Vaccinated)	Scenario 4B_U (Unvaccinated)	Scenario 4C_V (Vaccinated)	Scenario 4C_U (Unvaccinated)		PICS:ICU Survival	Scenario 4A_V (Vaccinated)	Scenario 4A_U (Unvaccinated)	Scenario 4B_V (Vaccinated)	Scenario 4B_U (Unvaccinated)	Scenario 4C_V (Vaccinated)	Scenario 4C_U (Unvaccinated)
Australian COVID case (without death)			716	4884	9779	63036	40671	234412		Moderate	671	4750	9166	61244	38072	227016		60-69	0.971818	1.21477	12.6336	14.3343	63.1681	72.4004
Australian poulation as of 31Dec2020 (e)			25694393	25694393	25694393	25694393	25694393	25694393		Severe	44	131	620	1787	2558	7206		70-79	0.444929	0.556161	5.78407	6.5627	28.9204	33.1472
Australian COVID case with deaths			724	4903	9894	63295	41187	235574		Critical	9	22	108	264	557	1352		80-89	0.105378	0.131722	1.36991	1.55432	6.84956	7.85065
Ausrtalian COVID cases (>10 and above)			716	2575.38	9779	33655.7	40671	129501										90+	0	0	0	0	0	0
Australian COVID cases (Hosp without death; >30 years old)			542.167	966	7357	12802.8	30096.3	51051.9										Totals	1.52212	1.90265	19.7876	22.4513	98.9381	113.398
YEAR			365.25
DISABILITY WEIGHTS (g)			MID	LL	UL	sigma	alpha1	alpha2	ERSATZ
DW(Moderate)			0.051	0.032	0.074	0.0107143	21.4511	399.158	#NAME?
DW(Severe)			0.133	0.088	0.19	0.0260204	22.5184	146.793	#NAME?
DW(Critical)			0.655	0.579	0.727	0.0377551	103.182	54.3476	#NAME?
DW(Chronic)			0.219	0.148	0.308	0.0408163	22.2649	79.4013	#NAME?
DW(Afib as proxy for PICS) (i)			0.224	0.151	0.312	0.0410714	22.8582	79.1875	#NAME?
SEVERITY DISTRIBUTION
ACUTE (Proportion)			%	Duration (days)
N Asymptomatic (will not be added in the YLD) (h)			NA	14
N(Moderate) (a)			NA	14
N(Severe) (a)			NA	14
N(Critical)* (a)			NA	14
CHRONIC			%	Duration (days)		OR	95%CI LL	95%CI UL	RR	LL	UL	SE	ERSATZ
Post (acute) after symptomatic duration to 2 years			See ONS Post-Acute Sheet		Treatment effect of full dose of COVID vaccine	0.51	0.32	0.82	0.540174	0.346891	0.837179	0.0923705	#NAME?
Post-intesive care syndrome			%	Duration (days)
1) PICS			0.906	RLE
Permanent functional impairment			%	LL	UL		Duration	sigma	alpha1	alpha2	ERSATZ
2) Diabetes			0.0282921	0.0256649	0.0312028		RLE	0.00141273	389.685	13384	#NAME?
3) Parkinsons			0.0011	0.00079	0.0014		RLE	0.000155612	49.9126	45325.2	#NAME?
4) Dementia			0.0067	0.0059	0.0075		RLE	0.000408163	267.64	39678.7	#NAME?
5) Anxiety Disorders			0.0711	0.0682	0.0741		RLE	0.0015051	2072.82	27080.8	#NAME?
5) Ischaemic Stroke			0.0076	0.0068	0.0085		RLE	0.000433673	304.774	39797	#NAME?
ACUTE
Morbidity calculation (Total incidence cases/Checking/Scenario analysis)
			Scenario 4A						Scenario 4B						Scenario 4C
			Scenario 4A_V (Vaccinated)			Scenario 4A_U (Unvaccinated)			Scenario 4B_V (Vaccinated)			Scenario 4B_U (Unvaccinated)			Scenario 4C_V (Vaccinated)			Scenario 4C_U (Unvaccinated)
				Case (Person - years)	YLD		Case (Person - years)	YLD		Case (Person - years)	YLD		Case (Person - years)	YLD		Case (Person - years)	YLD		Case (Person - years)	YLD
			Base	Base	Base DL	Base	Base	Base DL	Base	Base	Base DL	Base	Base	Base DL	Base	Base	Base DL	Base	Base	Base DL
	Moderate		671	25.7194	#NAME?	4750	182.067	#NAME?	9166	351.332	#NAME?	61244	2347.48	#NAME?	38072	1459.3	#NAME?	227016	8701.5	#NAME?
	Severe		44	1.68652	#NAME?	131	5.02122	#NAME?	620	23.7645	#NAME?	1787	68.4956	#NAME?	2558	98.0479	#NAME?	7206	276.205	#NAME?
	Critical		9	0.344969	#NAME?	22	0.843258	#NAME?	108	4.13963	#NAME?	264	10.1191	#NAME?	557	21.3498	#NAME?	1352	51.822	#NAME?
	TOTAL				#NAME?			#NAME?			#NAME?			#NAME?			#NAME?			#NAME?
CHRONIC/LONG COVID
										SCENARIO 4A								SCENARIO 4B								SCENARIO 4C
			ONS			ERSATZ				Scenario4IA_V (Vaccinated)				Scenario 4A_U (Unvaccinated)				Scenario 4B_V (Vaccinated)				Scenario 4B_U (Unvaccinated)				Scenario 4C_V (Vaccinated)				Scenario 4C_U (Unvaccinated)
	weeks		Baseline	LL	UL	sigma	alpha1	alpha2	Ersazt	Recalculation (mutually exclusive)	Incidence	DALYs/year	DALYS per 100,000	Recalculation (mutually exclusive)	Incidence	DALYs/year	DALYS per 100,000	Recalculation (mutually exclusive)	Incidence	DALYs/year	DALYS per 100,000	Recalculation (mutually exclusive)	Incidence	DALYs/year	DALYS per 100,000	Recalculation (mutually exclusive)	Incidence	DALYs/year	DALYS per 100,000	Recalculation (mutually exclusive)	Incidence	DALYs/year	DALYS per 100,000
	0		0.3111	0.2887	0.3358	0.0120153	461.524	1022	#NAME?	#NAME?	#NAME?	#NAME?	#NAME?	#NAME?	#NAME?	#NAME?	#NAME?	#NAME?	#NAME?	#NAME?	#NAME?	#NAME?	#NAME?	#NAME?	#NAME?	#NAME?	#NAME?	#NAME?	#NAME?	#NAME?	#NAME?	#NAME?	#NAME?
	1		0.29269	0.268376	0.319742	0.0131037	352.594	852.073	#NAME?	#NAME?	#NAME?	#NAME?	#NAME?	#NAME?	#NAME?	#NAME?	#NAME?	#NAME?	#NAME?	#NAME?	#NAME?	#NAME?	#NAME?	#NAME?	#NAME?	#NAME?	#NAME?	#NAME?	#NAME?	#NAME?	#NAME?	#NAME?	#NAME?
	2		0.27537	0.249482	0.304453	0.0140231	279.148	734.574	#NAME?	#NAME?	#NAME?	#NAME?	#NAME?	#NAME?	#NAME?	#NAME?	#NAME?	#NAME?	#NAME?	#NAME?	#NAME?	#NAME?	#NAME?	#NAME?	#NAME?	#NAME?	#NAME?	#NAME?	#NAME?	#NAME?	#NAME?	#NAME?	#NAME?
	3		0.259074	0.231919	0.289894	0.0147896	227.1	649.482	#NAME?	#NAME?	#NAME?	#NAME?	#NAME?	#NAME?	#NAME?	#NAME?	#NAME?	#NAME?	#NAME?	#NAME?	#NAME?	#NAME?	#NAME?	#NAME?	#NAME?	#NAME?	#NAME?	#NAME?	#NAME?	#NAME?	#NAME?	#NAME?	#NAME?
	4		0.243743	0.215592	0.276032	0.0154183	188.756	585.651	#NAME?	#NAME?	#NAME?	#NAME?	#NAME?	#NAME?	#NAME?	#NAME?	#NAME?	#NAME?	#NAME?	#NAME?	#NAME?	#NAME?	#NAME?	#NAME?	#NAME?	#NAME?	#NAME?	#NAME?	#NAME?	#NAME?	#NAME?	#NAME?	#NAME?
	5		0.229319	0.200415	0.262832	0.0159229	159.621	536.443	#NAME?	#NAME?	#NAME?	#NAME?	#NAME?	#NAME?	#NAME?	#NAME?	#NAME?	#NAME?	#NAME?	#NAME?	#NAME?	#NAME?	#NAME?	#NAME?	#NAME?	#NAME?	#NAME?	#NAME?	#NAME?	#NAME?	#NAME?	#NAME?	#NAME?
	6		0.215749	0.186306	0.250264	0.0163159	136.914	497.684	#NAME?	#NAME?	#NAME?	#NAME?	#NAME?	#NAME?	#NAME?	#NAME?	#NAME?	#NAME?	#NAME?	#NAME?	#NAME?	#NAME?	#NAME?	#NAME?	#NAME?	#NAME?	#NAME?	#NAME?	#NAME?	#NAME?	#NAME?	#NAME?	#NAME?
	7		0.202981	0.17319	0.238297	0.0166089	118.839	466.63	#NAME?	#NAME?	#NAME?	#NAME?	#NAME?	#NAME?	#NAME?	#NAME?	#NAME?	#NAME?	#NAME?	#NAME?	#NAME?	#NAME?	#NAME?	#NAME?	#NAME?	#NAME?	#NAME?	#NAME?	#NAME?	#NAME?	#NAME?	#NAME?	#NAME?
	8		0.19097	0.160997	0.226901	0.0168123	104.195	441.414	#NAME?	#NAME?	#NAME?	#NAME?	#NAME?	#NAME?	#NAME?	#NAME?	#NAME?	#NAME?	#NAME?	#NAME?	#NAME?	#NAME?	#NAME?	#NAME?	#NAME?	#NAME?	#NAME?	#NAME?	#NAME?	#NAME?	#NAME?	#NAME?	#NAME?
	9		0.179669	0.149663	0.216051	0.0169357	92.147	420.725	#NAME?	#NAME?	#NAME?	#NAME?	#NAME?	#NAME?	#NAME?	#NAME?	#NAME?	#NAME?	#NAME?	#NAME?	#NAME?	#NAME?	#NAME?	#NAME?	#NAME?	#NAME?	#NAME?	#NAME?	#NAME?	#NAME?	#NAME?	#NAME?	#NAME?
	10		0.169036	0.139127	0.20572	0.016988	82.1045	403.616	#NAME?	#NAME?	#NAME?	#NAME?	#NAME?	#NAME?	#NAME?	#NAME?	#NAME?	#NAME?	#NAME?	#NAME?	#NAME?	#NAME?	#NAME?	#NAME?	#NAME?	#NAME?	#NAME?	#NAME?	#NAME?	#NAME?	#NAME?	#NAME?	#NAME?
	11		0.159033	0.129333	0.195883	0.016977	73.6369	389.391	#NAME?	#NAME?	#NAME?	#NAME?	#NAME?	#NAME?	#NAME?	#NAME?	#NAME?	#NAME?	#NAME?	#NAME?	#NAME?	#NAME?	#NAME?	#NAME?	#NAME?	#NAME?	#NAME?	#NAME?	#NAME?	#NAME?	#NAME?	#NAME?	#NAME?
	12		0.149622	0.120228	0.186516	0.0169102	66.4248	377.525	#NAME?	#NAME?	#NAME?	#NAME?	#NAME?	#NAME?	#NAME?	#NAME?	#NAME?	#NAME?	#NAME?	#NAME?	#NAME?	#NAME?	#NAME?	#NAME?	#NAME?	#NAME?	#NAME?	#NAME?	#NAME?	#NAME?	#NAME?	#NAME?	#NAME?
	13		0.140768	0.111764	0.177597	0.0167941	60.227	367.618	#NAME?	#NAME?	#NAME?	#NAME?	#NAME?	#NAME?	#NAME?	#NAME?	#NAME?	#NAME?	#NAME?	#NAME?	#NAME?	#NAME?	#NAME?	#NAME?	#NAME?	#NAME?	#NAME?	#NAME?	#NAME?	#NAME?	#NAME?	#NAME?	#NAME?
	14		0.132438	0.103896	0.169104	0.0166348	54.8582	359.36	#NAME?	#NAME?	#NAME?	#NAME?	#NAME?	#NAME?	#NAME?	#NAME?	#NAME?	#NAME?	#NAME?	#NAME?	#NAME?	#NAME?	#NAME?	#NAME?	#NAME?	#NAME?	#NAME?	#NAME?	#NAME?	#NAME?	#NAME?	#NAME?	#NAME?
	15		0.124601	0.0965816	0.161018	0.0164378	50.1742	352.506	#NAME?	#NAME?	#NAME?	#NAME?	#NAME?	#NAME?	#NAME?	#NAME?	#NAME?	#NAME?	#NAME?	#NAME?	#NAME?	#NAME?	#NAME?	#NAME?	#NAME?	#NAME?	#NAME?	#NAME?	#NAME?	#NAME?	#NAME?	#NAME?	#NAME?
	16		0.117227	0.0897823	0.153318	0.0162081	46.0613	346.861	#NAME?	#NAME?	#NAME?	#NAME?	#NAME?	#NAME?	#NAME?	#NAME?	#NAME?	#NAME?	#NAME?	#NAME?	#NAME?	#NAME?	#NAME?	#NAME?	#NAME?	#NAME?	#NAME?	#NAME?	#NAME?	#NAME?	#NAME?	#NAME?	#NAME?
	17		0.11029	0.0834617	0.145987	0.0159503	42.4286	342.271	#NAME?	#NAME?	#NAME?	#NAME?	#NAME?	#NAME?	#NAME?	#NAME?	#NAME?	#NAME?	#NAME?	#NAME?	#NAME?	#NAME?	#NAME?	#NAME?	#NAME?	#NAME?	#NAME?	#NAME?	#NAME?	#NAME?	#NAME?	#NAME?	#NAME?
	18		0.103764	0.0775861	0.139006	0.0156683	39.2031	338.609	#NAME?	#NAME?	#NAME?	#NAME?	#NAME?	#NAME?	#NAME?	#NAME?	#NAME?	#NAME?	#NAME?	#NAME?	#NAME?	#NAME?	#NAME?	#NAME?	#NAME?	#NAME?	#NAME?	#NAME?	#NAME?	#NAME?	#NAME?	#NAME?	#NAME?
	19		0.0976231	0.0721241	0.132359	0.015366	36.3252	335.771	#NAME?	#NAME?	#NAME?	#NAME?	#NAME?	#NAME?	#NAME?	#NAME?	#NAME?	#NAME?	#NAME?	#NAME?	#NAME?	#NAME?	#NAME?	#NAME?	#NAME?	#NAME?	#NAME?	#NAME?	#NAME?	#NAME?	#NAME?	#NAME?	#NAME?
`	20		0.0918461	0.0670466	0.126029	0.0150466	33.7459	333.672	#NAME?	#NAME?	#NAME?	#NAME?	#NAME?	#NAME?	#NAME?	#NAME?	#NAME?	#NAME?	#NAME?	#NAME?	#NAME?	#NAME?	#NAME?	#NAME?	#NAME?	#NAME?	#NAME?	#NAME?	#NAME?	#NAME?	#NAME?	#NAME?	#NAME?
	21		0.086411	0.0623266	0.120003	0.0147133	31.4249	332.243	#NAME?	#NAME?	#NAME?	#NAME?	#NAME?	#NAME?	#NAME?	#NAME?	#NAME?	#NAME?	#NAME?	#NAME?	#NAME?	#NAME?	#NAME?	#NAME?	#NAME?	#NAME?	#NAME?	#NAME?	#NAME?	#NAME?	#NAME?	#NAME?	#NAME?
	22		0.0812974	0.0579388	0.114264	0.0143688	29.3283	331.424	#NAME?	#NAME?	#NAME?	#NAME?	#NAME?	#NAME?	#NAME?	#NAME?	#NAME?	#NAME?	#NAME?	#NAME?	#NAME?	#NAME?	#NAME?	#NAME?	#NAME?	#NAME?	#NAME?	#NAME?	#NAME?	#NAME?	#NAME?	#NAME?	#NAME?
	23		0.0764865	0.05386	0.1088	0.0140154	27.4278	331.169	#NAME?	#NAME?	#NAME?	#NAME?	#NAME?	#NAME?	#NAME?	#NAME?	#NAME?	#NAME?	#NAME?	#NAME?	#NAME?	#NAME?	#NAME?	#NAME?	#NAME?	#NAME?	#NAME?	#NAME?	#NAME?	#NAME?	#NAME?	#NAME?	#NAME?
	24		0.0719603	0.0500683	0.103598	0.0136555	25.6995	331.435	#NAME?	#NAME?	#NAME?	#NAME?	#NAME?	#NAME?	#NAME?	#NAME?	#NAME?	#NAME?	#NAME?	#NAME?	#NAME?	#NAME?	#NAME?	#NAME?	#NAME?	#NAME?	#NAME?	#NAME?	#NAME?	#NAME?	#NAME?	#NAME?	#NAME?
	25		0.0677019	0.0465435	0.0986438	0.0132909	24.123	332.189	#NAME?	#NAME?	#NAME?	#NAME?	#NAME?	#NAME?	#NAME?	#NAME?	#NAME?	#NAME?	#NAME?	#NAME?	#NAME?	#NAME?	#NAME?	#NAME?	#NAME?	#NAME?	#NAME?	#NAME?	#NAME?	#NAME?	#NAME?	#NAME?	#NAME?
	26		0.0636955	0.0432669	0.0939268	0.0129234	22.6809	333.402	#NAME?	#NAME?	#NAME?	#NAME?	#NAME?	#NAME?	#NAME?	#NAME?	#NAME?	#NAME?	#NAME?	#NAME?	#NAME?	#NAME?	#NAME?	#NAME?	#NAME?	#NAME?	#NAME?	#NAME?	#NAME?	#NAME?	#NAME?	#NAME?	#NAME?
	27		0.0599262	0.040221	0.0894353	0.0125547	21.3583	335.052	#NAME?	#NAME?	#NAME?	#NAME?	#NAME?	#NAME?	#NAME?	#NAME?	#NAME?	#NAME?	#NAME?	#NAME?	#NAME?	#NAME?	#NAME?	#NAME?	#NAME?	#NAME?	#NAME?	#NAME?	#NAME?	#NAME?	#NAME?	#NAME?	#NAME?
	28		0.05638	0.0373894	0.0851586	0.012186	20.1423	337.118	#NAME?	#NAME?	#NAME?	#NAME?	#NAME?	#NAME?	#NAME?	#NAME?	#NAME?	#NAME?	#NAME?	#NAME?	#NAME?	#NAME?	#NAME?	#NAME?	#NAME?	#NAME?	#NAME?	#NAME?	#NAME?	#NAME?	#NAME?	#NAME?	#NAME?
	29		0.0530436	0.0347572	0.0810864	0.0118187	19.0217	339.583	#NAME?	#NAME?	#NAME?	#NAME?	#NAME?	#NAME?	#NAME?	#NAME?	#NAME?	#NAME?	#NAME?	#NAME?	#NAME?	#NAME?	#NAME?	#NAME?	#NAME?	#NAME?	#NAME?	#NAME?	#NAME?	#NAME?	#NAME?	#NAME?	#NAME?
	30		0.0499047	0.0323104	0.077209	0.0114537	17.9867	342.435	#NAME?	#NAME?	#NAME?	#NAME?	#NAME?	#NAME?	#NAME?	#NAME?	#NAME?	#NAME?	#NAME?	#NAME?	#NAME?	#NAME?	#NAME?	#NAME?	#NAME?	#NAME?	#NAME?	#NAME?	#NAME?	#NAME?	#NAME?	#NAME?	#NAME?
	31		0.0469515	0.0300357	0.0735169	0.0110921	17.0289	345.663	#NAME?	#NAME?	#NAME?	#NAME?	#NAME?	#NAME?	#NAME?	#NAME?	#NAME?	#NAME?	#NAME?	#NAME?	#NAME?	#NAME?	#NAME?	#NAME?	#NAME?	#NAME?	#NAME?	#NAME?	#NAME?	#NAME?	#NAME?	#NAME?	#NAME?
	32		0.044173	0.0279213	0.0700014	0.0107347	16.1407	349.257	#NAME?	#NAME?	#NAME?	#NAME?	#NAME?	#NAME?	#NAME?	#NAME?	#NAME?	#NAME?	#NAME?	#NAME?	#NAME?	#NAME?	#NAME?	#NAME?	#NAME?	#NAME?	#NAME?	#NAME?	#NAME?	#NAME?	#NAME?	#NAME?	#NAME?
	33		0.041559	0.0259556	0.066654	0.0103823	15.3157	353.212	#NAME?	#NAME?	#NAME?	#NAME?	#NAME?	#NAME?	#NAME?	#NAME?	#NAME?	#NAME?	#NAME?	#NAME?	#NAME?	#NAME?	#NAME?	#NAME?	#NAME?	#NAME?	#NAME?	#NAME?	#NAME?	#NAME?	#NAME?	#NAME?	#NAME?
	34		0.0390997	0.0241284	0.0634667	0.0100353	14.5478	357.523	#NAME?	#NAME?	#NAME?	#NAME?	#NAME?	#NAME?	#NAME?	#NAME?	#NAME?	#NAME?	#NAME?	#NAME?	#NAME?	#NAME?	#NAME?	#NAME?	#NAME?	#NAME?	#NAME?	#NAME?	#NAME?	#NAME?	#NAME?	#NAME?	#NAME?
	35		0.0367859	0.0224297	0.0604318	0.00969441	13.8321	362.186	#NAME?	#NAME?	#NAME?	#NAME?	#NAME?	#NAME?	#NAME?	#NAME?	#NAME?	#NAME?	#NAME?	#NAME?	#NAME?	#NAME?	#NAME?	#NAME?	#NAME?	#NAME?	#NAME?	#NAME?	#NAME?	#NAME?	#NAME?	#NAME?	#NAME?
	36		0.034609	0.0208507	0.057542	0.00936003	13.164	367.198	#NAME?	#NAME?	#NAME?	#NAME?	#NAME?	#NAME?	#NAME?	#NAME?	#NAME?	#NAME?	#NAME?	#NAME?	#NAME?	#NAME?	#NAME?	#NAME?	#NAME?	#NAME?	#NAME?	#NAME?	#NAME?	#NAME?	#NAME?	#NAME?	#NAME?
	37		0.032561	0.0193828	0.0547904	0.00903255	12.5392	372.561	#NAME?	#NAME?	#NAME?	#NAME?	#NAME?	#NAME?	#NAME?	#NAME?	#NAME?	#NAME?	#NAME?	#NAME?	#NAME?	#NAME?	#NAME?	#NAME?	#NAME?	#NAME?	#NAME?	#NAME?	#NAME?	#NAME?	#NAME?	#NAME?	#NAME?
	38		0.0306341	0.0180183	0.0521704	0.00871228	11.9543	378.274	#NAME?	#NAME?	#NAME?	#NAME?	#NAME?	#NAME?	#NAME?	#NAME?	#NAME?	#NAME?	#NAME?	#NAME?	#NAME?	#NAME?	#NAME?	#NAME?	#NAME?	#NAME?	#NAME?	#NAME?	#NAME?	#NAME?	#NAME?	#NAME?	#NAME?
	39		0.0288213	0.0167498	0.0496757	0.00839946	11.4059	384.338	#NAME?	#NAME?	#NAME?	#NAME?	#NAME?	#NAME?	#NAME?	#NAME?	#NAME?	#NAME?	#NAME?	#NAME?	#NAME?	#NAME?	#NAME?	#NAME?	#NAME?	#NAME?	#NAME?	#NAME?	#NAME?	#NAME?	#NAME?	#NAME?	#NAME?
	40		0.0271157	0.0155707	0.0473003	0.00809429	10.891	390.757	#NAME?	#NAME?	#NAME?	#NAME?	#NAME?	#NAME?	#NAME?	#NAME?	#NAME?	#NAME?	#NAME?	#NAME?	#NAME?	#NAME?	#NAME?	#NAME?	#NAME?	#NAME?	#NAME?	#NAME?	#NAME?	#NAME?	#NAME?	#NAME?	#NAME?
	41		0.0255111	0.0144745	0.0450384	0.00779692	10.407	397.534	#NAME?	#NAME?	#NAME?	#NAME?	#NAME?	#NAME?	#NAME?	#NAME?	#NAME?	#NAME?	#NAME?	#NAME?	#NAME?	#NAME?	#NAME?	#NAME?	#NAME?	#NAME?	#NAME?	#NAME?	#NAME?	#NAME?	#NAME?	#NAME?	#NAME?
	42		0.0240015	0.0134555	0.0428847	0.00750746	9.95159	404.673	#NAME?	#NAME?	#NAME?	#NAME?	#NAME?	#NAME?	#NAME?	#NAME?	#NAME?	#NAME?	#NAME?	#NAME?	#NAME?	#NAME?	#NAME?	#NAME?	#NAME?	#NAME?	#NAME?	#NAME?	#NAME?	#NAME?	#NAME?	#NAME?	#NAME?
	43		0.0225811	0.0125082	0.040834	0.00722596	9.52251	412.18	#NAME?	#NAME?	#NAME?	#NAME?	#NAME?	#NAME?	#NAME?	#NAME?	#NAME?	#NAME?	#NAME?	#NAME?	#NAME?	#NAME?	#NAME?	#NAME?	#NAME?	#NAME?	#NAME?	#NAME?	#NAME?	#NAME?	#NAME?	#NAME?	#NAME?
	44		0.0212448	0.0116277	0.0388814	0.00695248	9.11783	420.06	#NAME?	#NAME?	#NAME?	#NAME?	#NAME?	#NAME?	#NAME?	#NAME?	#NAME?	#NAME?	#NAME?	#NAME?	#NAME?	#NAME?	#NAME?	#NAME?	#NAME?	#NAME?	#NAME?	#NAME?	#NAME?	#NAME?	#NAME?	#NAME?	#NAME?
	45		0.0199876	0.0108091	0.0370221	0.006687	8.73575	428.322	#NAME?	#NAME?	#NAME?	#NAME?	#NAME?	#NAME?	#NAME?	#NAME?	#NAME?	#NAME?	#NAME?	#NAME?	#NAME?	#NAME?	#NAME?	#NAME?	#NAME?	#NAME?	#NAME?	#NAME?	#NAME?	#NAME?	#NAME?	#NAME?	#NAME?
	46		0.0188048	0.0100481	0.0352518	0.0064295	8.37465	436.971	#NAME?	#NAME?	#NAME?	#NAME?	#NAME?	#NAME?	#NAME?	#NAME?	#NAME?	#NAME?	#NAME?	#NAME?	#NAME?	#NAME?	#NAME?	#NAME?	#NAME?	#NAME?	#NAME?	#NAME?	#NAME?	#NAME?	#NAME?	#NAME?	#NAME?
	47		0.017692	0.00934076	0.0335661	0.00617992	8.03307	446.017	#NAME?	#NAME?	#NAME?	#NAME?	#NAME?	#NAME?	#NAME?	#NAME?	#NAME?	#NAME?	#NAME?	#NAME?	#NAME?	#NAME?	#NAME?	#NAME?	#NAME?	#NAME?	#NAME?	#NAME?	#NAME?	#NAME?	#NAME?	#NAME?	#NAME?
	48		0.0166451	0.00868318	0.031961	0.00593821	7.70963	455.468	#NAME?	#NAME?	#NAME?	#NAME?	#NAME?	#NAME?	#NAME?	#NAME?	#NAME?	#NAME?	#NAME?	#NAME?	#NAME?	#NAME?	#NAME?	#NAME?	#NAME?	#NAME?	#NAME?	#NAME?	#NAME?	#NAME?	#NAME?	#NAME?	#NAME?
	49		0.0156601	0.00807189	0.0304326	0.00570427	7.40312	465.335	#NAME?	#NAME?	#NAME?	#NAME?	#NAME?	#NAME?	#NAME?	#NAME?	#NAME?	#NAME?	#NAME?	#NAME?	#NAME?	#NAME?	#NAME?	#NAME?	#NAME?	#NAME?	#NAME?	#NAME?	#NAME?	#NAME?	#NAME?	#NAME?	#NAME?
	50		0.0147334	0.00750364	0.0289774	0.005478	7.11238	475.628	#NAME?	#NAME?	#NAME?	#NAME?	#NAME?	#NAME?	#NAME?	#NAME?	#NAME?	#NAME?	#NAME?	#NAME?	#NAME?	#NAME?	#NAME?	#NAME?	#NAME?	#NAME?	#NAME?	#NAME?	#NAME?	#NAME?	#NAME?	#NAME?	#NAME?
	51		0.0138615	0.00697539	0.0275917	0.00525927	6.8364	486.357	#NAME?	#NAME?	#NAME?	#NAME?	#NAME?	#NAME?	#NAME?	#NAME?	#NAME?	#NAME?	#NAME?	#NAME?	#NAME?	#NAME?	#NAME?	#NAME?	#NAME?	#NAME?	#NAME?	#NAME?	#NAME?	#NAME?	#NAME?	#NAME?	#NAME?
	52		0.0130412	0.00648433	0.0262723	0.00504796	6.5742	497.536	#NAME?	#NAME?	#NAME?	#NAME?	#NAME?	#NAME?	#NAME?	#NAME?	#NAME?	#NAME?	#NAME?	#NAME?	#NAME?	#NAME?	#NAME?	#NAME?	#NAME?	#NAME?	#NAME?	#NAME?	#NAME?	#NAME?	#NAME?	#NAME?	#NAME?
	53		0.0122695	0.00602784	0.025016	0.00484392	6.32492	509.175	#NAME?	#NAME?	#NAME?	#NAME?	#NAME?	#NAME?	#NAME?	#NAME?	#NAME?	#NAME?	#NAME?	#NAME?	#NAME?	#NAME?	#NAME?	#NAME?	#NAME?	#NAME?	#NAME?	#NAME?	#NAME?	#NAME?	#NAME?	#NAME?	#NAME?
	54		0.0115434	0.00560348	0.0238198	0.00464701	6.08773	521.29	#NAME?	#NAME?	#NAME?	#NAME?	#NAME?	#NAME?	#NAME?	#NAME?	#NAME?	#NAME?	#NAME?	#NAME?	#NAME?	#NAME?	#NAME?	#NAME?	#NAME?	#NAME?	#NAME?	#NAME?	#NAME?	#NAME?	#NAME?	#NAME?	#NAME?
	55		0.0108603	0.005209	0.0226807	0.00445707	5.8619	533.892	#NAME?	#NAME?	#NAME?	#NAME?	#NAME?	#NAME?	#NAME?	#NAME?	#NAME?	#NAME?	#NAME?	#NAME?	#NAME?	#NAME?	#NAME?	#NAME?	#NAME?	#NAME?	#NAME?	#NAME?	#NAME?	#NAME?	#NAME?	#NAME?	#NAME?
	56		0.0102176	0.00484229	0.0215962	0.00427395	5.64672	546.998	#NAME?	#NAME?	#NAME?	#NAME?	#NAME?	#NAME?	#NAME?	#NAME?	#NAME?	#NAME?	#NAME?	#NAME?	#NAME?	#NAME?	#NAME?	#NAME?	#NAME?	#NAME?	#NAME?	#NAME?	#NAME?	#NAME?	#NAME?	#NAME?	#NAME?
	57		0.00961298	0.0045014	0.0205635	0.00409746	5.44157	560.623	#NAME?	#NAME?	#NAME?	#NAME?	#NAME?	#NAME?	#NAME?	#NAME?	#NAME?	#NAME?	#NAME?	#NAME?	#NAME?	#NAME?	#NAME?	#NAME?	#NAME?	#NAME?	#NAME?	#NAME?	#NAME?	#NAME?	#NAME?	#NAME?	#NAME?
	58		0.00904412	0.0041845	0.0195801	0.00392746	5.24584	574.783	#NAME?	#NAME?	#NAME?	#NAME?	#NAME?	#NAME?	#NAME?	#NAME?	#NAME?	#NAME?	#NAME?	#NAME?	#NAME?	#NAME?	#NAME?	#NAME?	#NAME?	#NAME?	#NAME?	#NAME?	#NAME?	#NAME?	#NAME?	#NAME?	#NAME?
	59		0.00850891	0.00388992	0.0186438	0.00376376	5.059	589.494	#NAME?	#NAME?	#NAME?	#NAME?	#NAME?	#NAME?	#NAME?	#NAME?	#NAME?	#NAME?	#NAME?	#NAME?	#NAME?	#NAME?	#NAME?	#NAME?	#NAME?	#NAME?	#NAME?	#NAME?	#NAME?	#NAME?	#NAME?	#NAME?	#NAME?
	60		0.00800538	0.00361607	0.0177523	0.00360618	4.88052	604.774	#NAME?	#NAME?	#NAME?	#NAME?	#NAME?	#NAME?	#NAME?	#NAME?	#NAME?	#NAME?	#NAME?	#NAME?	#NAME?	#NAME?	#NAME?	#NAME?	#NAME?	#NAME?	#NAME?	#NAME?	#NAME?	#NAME?	#NAME?	#NAME?	#NAME?
	61		0.00753165	0.0033615	0.0169034	0.00345457	4.70994	620.643	#NAME?	#NAME?	#NAME?	#NAME?	#NAME?	#NAME?	#NAME?	#NAME?	#NAME?	#NAME?	#NAME?	#NAME?	#NAME?	#NAME?	#NAME?	#NAME?	#NAME?	#NAME?	#NAME?	#NAME?	#NAME?	#NAME?	#NAME?	#NAME?	#NAME?
	62		0.00708595	0.00312486	0.0160951	0.00330874	4.54681	637.118	#NAME?	#NAME?	#NAME?	#NAME?	#NAME?	#NAME?	#NAME?	#NAME?	#NAME?	#NAME?	#NAME?	#NAME?	#NAME?	#NAME?	#NAME?	#NAME?	#NAME?	#NAME?	#NAME?	#NAME?	#NAME?	#NAME?	#NAME?	#NAME?	#NAME?
	63		0.00666663	0.00290487	0.0153255	0.00316852	4.39072	654.221	#NAME?	#NAME?	#NAME?	#NAME?	#NAME?	#NAME?	#NAME?	#NAME?	#NAME?	#NAME?	#NAME?	#NAME?	#NAME?	#NAME?	#NAME?	#NAME?	#NAME?	#NAME?	#NAME?	#NAME?	#NAME?	#NAME?	#NAME?	#NAME?	#NAME?
	64		0.00627212	0.00270037	0.0145926	0.00303374	4.2413	671.973	#NAME?	#NAME?	#NAME?	#NAME?	#NAME?	#NAME?	#NAME?	#NAME?	#NAME?	#NAME?	#NAME?	#NAME?	#NAME?	#NAME?	#NAME?	#NAME?	#NAME?	#NAME?	#NAME?	#NAME?	#NAME?	#NAME?	#NAME?	#NAME?	#NAME?
	65		0.00590096	0.00251026	0.0138948	0.00290422	4.09817	690.394	#NAME?	#NAME?	#NAME?	#NAME?	#NAME?	#NAME?	#NAME?	#NAME?	#NAME?	#NAME?	#NAME?	#NAME?	#NAME?	#NAME?	#NAME?	#NAME?	#NAME?	#NAME?	#NAME?	#NAME?	#NAME?	#NAME?	#NAME?	#NAME?	#NAME?
	66		0.00555176	0.00233354	0.0132304	0.00277981	3.96101	709.509	#NAME?	#NAME?	#NAME?	#NAME?	#NAME?	#NAME?	#NAME?	#NAME?	#NAME?	#NAME?	#NAME?	#NAME?	#NAME?	#NAME?	#NAME?	#NAME?	#NAME?	#NAME?	#NAME?	#NAME?	#NAME?	#NAME?	#NAME?	#NAME?	#NAME?
	67		0.00522322	0.00216926	0.0125977	0.00266032	3.82951	729.34	#NAME?	#NAME?	#NAME?	#NAME?	#NAME?	#NAME?	#NAME?	#NAME?	#NAME?	#NAME?	#NAME?	#NAME?	#NAME?	#NAME?	#NAME?	#NAME?	#NAME?	#NAME?	#NAME?	#NAME?	#NAME?	#NAME?	#NAME?	#NAME?	#NAME?
	68		0.00491413	0.00201655	0.0119953	0.0025456	3.70337	749.913	#NAME?	#NAME?	#NAME?	#NAME?	#NAME?	#NAME?	#NAME?	#NAME?	#NAME?	#NAME?	#NAME?	#NAME?	#NAME?	#NAME?	#NAME?	#NAME?	#NAME?	#NAME?	#NAME?	#NAME?	#NAME?	#NAME?	#NAME?	#NAME?	#NAME?
	69		0.00462333	0.00187459	0.0114217	0.00243549	3.58231	771.252	#NAME?	#NAME?	#NAME?	#NAME?	#NAME?	#NAME?	#NAME?	#NAME?	#NAME?	#NAME?	#NAME?	#NAME?	#NAME?	#NAME?	#NAME?	#NAME?	#NAME?	#NAME?	#NAME?	#NAME?	#NAME?	#NAME?	#NAME?	#NAME?	#NAME?
	70		0.00434973	0.00174262	0.0108755	0.00232983	3.46609	793.386	#NAME?	#NAME?	#NAME?	#NAME?	#NAME?	#NAME?	#NAME?	#NAME?	#NAME?	#NAME?	#NAME?	#NAME?	#NAME?	#NAME?	#NAME?	#NAME?	#NAME?	#NAME?	#NAME?	#NAME?	#NAME?	#NAME?	#NAME?	#NAME?	#NAME?
	71		0.00409233	0.00161994	0.0103555	0.00222845	3.35447	816.341	#NAME?	#NAME?	#NAME?	#NAME?	#NAME?	#NAME?	#NAME?	#NAME?	#NAME?	#NAME?	#NAME?	#NAME?	#NAME?	#NAME?	#NAME?	#NAME?	#NAME?	#NAME?	#NAME?	#NAME?	#NAME?	#NAME?	#NAME?	#NAME?	#NAME?
	72		0.00385016	0.0015059	0.00986029	0.00213122	3.2472	840.147	#NAME?	#NAME?	#NAME?	#NAME?	#NAME?	#NAME?	#NAME?	#NAME?	#NAME?	#NAME?	#NAME?	#NAME?	#NAME?	#NAME?	#NAME?	#NAME?	#NAME?	#NAME?	#NAME?	#NAME?	#NAME?	#NAME?	#NAME?	#NAME?	#NAME?
	73		0.00362232	0.00139988	0.00938878	0.00203799	3.14409	864.834	#NAME?	#NAME?	#NAME?	#NAME?	#NAME?	#NAME?	#NAME?	#NAME?	#NAME?	#NAME?	#NAME?	#NAME?	#NAME?	#NAME?	#NAME?	#NAME?	#NAME?	#NAME?	#NAME?	#NAME?	#NAME?	#NAME?	#NAME?	#NAME?	#NAME?
	74		0.00340796	0.00130133	0.00893982	0.00194859	3.04494	890.432	#NAME?	#NAME?	#NAME?	#NAME?	#NAME?	#NAME?	#NAME?	#NAME?	#NAME?	#NAME?	#NAME?	#NAME?	#NAME?	#NAME?	#NAME?	#NAME?	#NAME?	#NAME?	#NAME?	#NAME?	#NAME?	#NAME?	#NAME?	#NAME?	#NAME?
	75		0.00320629	0.00120972	0.00851233	0.00186291	2.94954	916.974	#NAME?	#NAME?	#NAME?	#NAME?	#NAME?	#NAME?	#NAME?	#NAME?	#NAME?	#NAME?	#NAME?	#NAME?	#NAME?	#NAME?	#NAME?	#NAME?	#NAME?	#NAME?	#NAME?	#NAME?	#NAME?	#NAME?	#NAME?	#NAME?	#NAME?
	76		0.00301655	0.00112456	0.00810528	0.0017808	2.85774	944.495	#NAME?	#NAME?	#NAME?	#NAME?	#NAME?	#NAME?	#NAME?	#NAME?	#NAME?	#NAME?	#NAME?	#NAME?	#NAME?	#NAME?	#NAME?	#NAME?	#NAME?	#NAME?	#NAME?	#NAME?	#NAME?	#NAME?	#NAME?	#NAME?	#NAME?
	77		0.00283804	0.00104539	0.0077177	0.00170212	2.76935	973.028	#NAME?	#NAME?	#NAME?	#NAME?	#NAME?	#NAME?	#NAME?	#NAME?	#NAME?	#NAME?	#NAME?	#NAME?	#NAME?	#NAME?	#NAME?	#NAME?	#NAME?	#NAME?	#NAME?	#NAME?	#NAME?	#NAME?	#NAME?	#NAME?	#NAME?
	78		0.0026701	0.000971794	0.00734864	0.00162675	2.68423	1002.61	#NAME?	#NAME?	#NAME?	#NAME?	#NAME?	#NAME?	#NAME?	#NAME?	#NAME?	#NAME?	#NAME?	#NAME?	#NAME?	#NAME?	#NAME?	#NAME?	#NAME?	#NAME?	#NAME?	#NAME?	#NAME?	#NAME?	#NAME?	#NAME?	#NAME?
	79		0.00251209	0.00090338	0.00699724	0.00155456	2.60223	1033.28	#NAME?	#NAME?	#NAME?	#NAME?	#NAME?	#NAME?	#NAME?	#NAME?	#NAME?	#NAME?	#NAME?	#NAME?	#NAME?	#NAME?	#NAME?	#NAME?	#NAME?	#NAME?	#NAME?	#NAME?	#NAME?	#NAME?	#NAME?	#NAME?	#NAME?
	80		0.00236343	0.000839783	0.00666264	0.00148542	2.5232	1065.08	#NAME?	#NAME?	#NAME?	#NAME?	#NAME?	#NAME?	#NAME?	#NAME?	#NAME?	#NAME?	#NAME?	#NAME?	#NAME?	#NAME?	#NAME?	#NAME?	#NAME?	#NAME?	#NAME?	#NAME?	#NAME?	#NAME?	#NAME?	#NAME?	#NAME?
	81		0.00222357	0.000780663	0.00634404	0.00141923	2.44701	1098.04	#NAME?	#NAME?	#NAME?	#NAME?	#NAME?	#NAME?	#NAME?	#NAME?	#NAME?	#NAME?	#NAME?	#NAME?	#NAME?	#NAME?	#NAME?	#NAME?	#NAME?	#NAME?	#NAME?	#NAME?	#NAME?	#NAME?	#NAME?	#NAME?	#NAME?
	82		0.00209199	0.000725705	0.00604067	0.00135586	2.37354	1132.21	#NAME?	#NAME?	#NAME?	#NAME?	#NAME?	#NAME?	#NAME?	#NAME?	#NAME?	#NAME?	#NAME?	#NAME?	#NAME?	#NAME?	#NAME?	#NAME?	#NAME?	#NAME?	#NAME?	#NAME?	#NAME?	#NAME?	#NAME?	#NAME?	#NAME?
	83		0.00196819	0.000674616	0.00575182	0.0012952	2.30267	1167.64	#NAME?	#NAME?	#NAME?	#NAME?	#NAME?	#NAME?	#NAME?	#NAME?	#NAME?	#NAME?	#NAME?	#NAME?	#NAME?	#NAME?	#NAME?	#NAME?	#NAME?	#NAME?	#NAME?	#NAME?	#NAME?	#NAME?	#NAME?	#NAME?	#NAME?
	84		0.00185172	0.000627123	0.00547677	0.00123716	2.23428	1204.36	#NAME?	#NAME?	#NAME?	#NAME?	#NAME?	#NAME?	#NAME?	#NAME?	#NAME?	#NAME?	#NAME?	#NAME?	#NAME?	#NAME?	#NAME?	#NAME?	#NAME?	#NAME?	#NAME?	#NAME?	#NAME?	#NAME?	#NAME?	#NAME?	#NAME?
	85		0.00174214	0.000582974	0.00521488	0.00118161	2.16827	1242.43	#NAME?	#NAME?	#NAME?	#NAME?	#NAME?	#NAME?	#NAME?	#NAME?	#NAME?	#NAME?	#NAME?	#NAME?	#NAME?	#NAME?	#NAME?	#NAME?	#NAME?	#NAME?	#NAME?	#NAME?	#NAME?	#NAME?	#NAME?	#NAME?	#NAME?
	86		0.00163905	0.000541934	0.00496551	0.00112846	2.10454	1281.9	#NAME?	#NAME?	#NAME?	#NAME?	#NAME?	#NAME?	#NAME?	#NAME?	#NAME?	#NAME?	#NAME?	#NAME?	#NAME?	#NAME?	#NAME?	#NAME?	#NAME?	#NAME?	#NAME?	#NAME?	#NAME?	#NAME?	#NAME?	#NAME?	#NAME?
	87		0.00154205	0.000503782	0.00472806	0.00107762	2.04299	1322.81	#NAME?	#NAME?	#NAME?	#NAME?	#NAME?	#NAME?	#NAME?	#NAME?	#NAME?	#NAME?	#NAME?	#NAME?	#NAME?	#NAME?	#NAME?	#NAME?	#NAME?	#NAME?	#NAME?	#NAME?	#NAME?	#NAME?	#NAME?	#NAME?	#NAME?
	88		0.0014508	0.000468316	0.00450197	0.00102899	1.98354	1365.22	#NAME?	#NAME?	#NAME?	#NAME?	#NAME?	#NAME?	#NAME?	#NAME?	#NAME?	#NAME?	#NAME?	#NAME?	#NAME?	#NAME?	#NAME?	#NAME?	#NAME?	#NAME?	#NAME?	#NAME?	#NAME?	#NAME?	#NAME?	#NAME?	#NAME?
	89		0.00136495	0.000435347	0.00428669	0.000982486	1.92609	1409.19	#NAME?	#NAME?	#NAME?	#NAME?	#NAME?	#NAME?	#NAME?	#NAME?	#NAME?	#NAME?	#NAME?	#NAME?	#NAME?	#NAME?	#NAME?	#NAME?	#NAME?	#NAME?	#NAME?	#NAME?	#NAME?	#NAME?	#NAME?	#NAME?	#NAME?
	90		0.00128417	0.000404699	0.00408171	0.000938013	1.87057	1454.76	#NAME?	#NAME?	#NAME?	#NAME?	#NAME?	#NAME?	#NAME?	#NAME?	#NAME?	#NAME?	#NAME?	#NAME?	#NAME?	#NAME?	#NAME?	#NAME?	#NAME?	#NAME?	#NAME?	#NAME?	#NAME?	#NAME?	#NAME?	#NAME?	#NAME?
	91		0.00120818	0.000376208	0.00388653	0.000895489	1.81689	1502.01	#NAME?	#NAME?	#NAME?	#NAME?	#NAME?	#NAME?	#NAME?	#NAME?	#NAME?	#NAME?	#NAME?	#NAME?	#NAME?	#NAME?	#NAME?	#NAME?	#NAME?	#NAME?	#NAME?	#NAME?	#NAME?	#NAME?	#NAME?	#NAME?	#NAME?
	92		0.00113668	0.000349724	0.00370068	0.000854835	1.76498	1550.98	#NAME?	#NAME?	#NAME?	#NAME?	#NAME?	#NAME?	#NAME?	#NAME?	#NAME?	#NAME?	#NAME?	#NAME?	#NAME?	#NAME?	#NAME?	#NAME?	#NAME?	#NAME?	#NAME?	#NAME?	#NAME?	#NAME?	#NAME?	#NAME?	#NAME?
	93		0.00106942	0.000325103	0.00352371	0.000815972	1.71478	1601.76	#NAME?	#NAME?	#NAME?	#NAME?	#NAME?	#NAME?	#NAME?	#NAME?	#NAME?	#NAME?	#NAME?	#NAME?	#NAME?	#NAME?	#NAME?	#NAME?	#NAME?	#NAME?	#NAME?	#NAME?	#NAME?	#NAME?	#NAME?	#NAME?	#NAME?
	94		0.00100613	0.000302216	0.00335521	0.000778826	1.66621	1654.39	#NAME?	#NAME?	#NAME?	#NAME?	#NAME?	#NAME?	#NAME?	#NAME?	#NAME?	#NAME?	#NAME?	#NAME?	#NAME?	#NAME?	#NAME?	#NAME?	#NAME?	#NAME?	#NAME?	#NAME?	#NAME?	#NAME?	#NAME?	#NAME?	#NAME?
	95		0.000946593	0.000280941	0.00319477	0.000743324	1.61922	1708.95	#NAME?	#NAME?	#NAME?	#NAME?	#NAME?	#NAME?	#NAME?	#NAME?	#NAME?	#NAME?	#NAME?	#NAME?	#NAME?	#NAME?	#NAME?	#NAME?	#NAME?	#NAME?	#NAME?	#NAME?	#NAME?	#NAME?	#NAME?	#NAME?	#NAME?
	96		0.000890577	0.000261163	0.003042	0.000709398	1.57373	1765.52	#NAME?	#NAME?	#NAME?	#NAME?	#NAME?	#NAME?	#NAME?	#NAME?	#NAME?	#NAME?	#NAME?	#NAME?	#NAME?	#NAME?	#NAME?	#NAME?	#NAME?	#NAME?	#NAME?	#NAME?	#NAME?	#NAME?	#NAME?	#NAME?	#NAME?
	97		0.000837876	0.000242777	0.00289654	0.000676979	1.5297	1824.16	#NAME?	#NAME?	#NAME?	#NAME?	#NAME?	#NAME?	#NAME?	#NAME?	#NAME?	#NAME?	#NAME?	#NAME?	#NAME?	#NAME?	#NAME?	#NAME?	#NAME?	#NAME?	#NAME?	#NAME?	#NAME?	#NAME?	#NAME?	#NAME?	#NAME?
	98		0.000788293	0.000225686	0.00275803	0.000646006	1.48707	1884.95	#NAME?	#NAME?	#NAME?	#NAME?	#NAME?	#NAME?	#NAME?	#NAME?	#NAME?	#NAME?	#NAME?	#NAME?	#NAME?	#NAME?	#NAME?	#NAME?	#NAME?	#NAME?	#NAME?	#NAME?	#NAME?	#NAME?	#NAME?	#NAME?	#NAME?
	99		0.000741644	0.000209798	0.00262614	0.000616414	1.44578	1947.97	#NAME?	#NAME?	#NAME?	#NAME?	#NAME?	#NAME?	#NAME?	#NAME?	#NAME?	#NAME?	#NAME?	#NAME?	#NAME?	#NAME?	#NAME?	#NAME?	#NAME?	#NAME?	#NAME?	#NAME?	#NAME?	#NAME?	#NAME?	#NAME?	#NAME?
	100		0.000697756	0.000195028	0.00250056	0.000588147	1.40578	2013.31	#NAME?	#NAME?	#NAME?	#NAME?	#NAME?	#NAME?	#NAME?	#NAME?	#NAME?	#NAME?	#NAME?	#NAME?	#NAME?	#NAME?	#NAME?	#NAME?	#NAME?	#NAME?	#NAME?	#NAME?	#NAME?	#NAME?	#NAME?	#NAME?	#NAME?
	101		0.000656465	0.000181298	0.00238099	0.000561145	1.36703	2081.05	#NAME?	#NAME?	#NAME?	#NAME?	#NAME?	#NAME?	#NAME?	#NAME?	#NAME?	#NAME?	#NAME?	#NAME?	#NAME?	#NAME?	#NAME?	#NAME?	#NAME?	#NAME?	#NAME?	#NAME?	#NAME?	#NAME?	#NAME?	#NAME?	#NAME?
	102		0.000617618	0.000168535	0.00226713	0.000535356	1.32948	2151.27	#NAME?	#NAME?	#NAME?	#NAME?	#NAME?	#NAME?	#NAME?	#NAME?	#NAME?	#NAME?	#NAME?	#NAME?	#NAME?	#NAME?	#NAME?	#NAME?	#NAME?	#NAME?	#NAME?	#NAME?	#NAME?	#NAME?	#NAME?	#NAME?	#NAME?
	103		0.000581069	0.00015667	0.00215872	0.000510727	1.29309	2224.08	#NAME?	#NAME?	#NAME?	#NAME?	#NAME?	#NAME?	#NAME?	#NAME?	#NAME?	#NAME?	#NAME?	#NAME?	#NAME?	#NAME?	#NAME?	#NAME?	#NAME?	#NAME?	#NAME?	#NAME?	#NAME?	#NAME?	#NAME?	#NAME?	#NAME?
	104		0.000546683	0.000145641	0.00205549	0.000487207	1.25782	2299.56	#NAME?	#NAME?			0	#NAME?			0	#NAME?			0	#NAME?			0	#NAME?			0	#NAME?			0
	YLD										#NAME?	#NAME?	#NAME?		#NAME?	#NAME?	#NAME?		#NAME?	#NAME?	#NAME?		#NAME?	#NAME?	#NAME?		#NAME?	#NAME?	#NAME?		#NAME?	#NAME?	#NAME?
PICS
			SCENARIO 4A												SCENARIO 4B												SCENARIO 4C
			Scenario 4A_V (Vaccinated)						Scenario 4A_U (Unvaccinated)						Scenario 4B (Vaccinated)						Scenario 4B_U (Unvaccinated)						Scenario 4C (Vaccinated)						Scenario 4C_U (Unvaccinated)
			COVID INCIDENCE	PICS INCIDENCE	LE tables (Yrs)	Duration (days)	Incidence-per year	DALYS	COVID INCIDENCE	PICS INCIDENCE	LE tables (Yrs)	Duration (days)	Incidence-per year	DALYS	COVID INCIDENCE	PICS INCIDENCE	LE tables (Yrs)	Duration (days)	Incidence-per year	DALYS	COVID INCIDENCE	PICS INCIDENCE	LE tables (Yrs)	Duration (days)	Incidence-per year	DALYS	COVID INCIDENCE	PICS INCIDENCE	LE tables (Yrs)	Duration (days)	Incidence-per year	DALYS	COVID INCIDENCE	PICS INCIDENCE	LE tables (Yrs)	Duration (days)	Incidence-per year	DALYS
	60-69		0.971818	0.880467	21.403	7803.43	18.8108	#NAME?	1.21477	1.10058	21.403	7803.43	23.5136	#NAME?	12.6336	11.4461	21.403	7803.43	244.541	#NAME?	14.3343	12.9869	21.403	7803.43	277.46	#NAME?	63.1681	57.2303	21.403	7803.43	1222.7	#NAME?	72.4004	65.5948	21.403	7803.43	1401.41	#NAME?
	70-79		0.444929	0.403105	13.4485	4898.07	5.40571	#NAME?	0.556161	0.503882	13.4485	4898.07	6.75714	#NAME?	5.78407	5.24037	13.4485	4898.07	70.2742	#NAME?	6.5627	5.9458	13.4485	4898.07	79.7342	#NAME?	28.9204	26.2018	13.4485	4898.07	351.371	#NAME?	33.1472	30.0313	13.4485	4898.07	402.725	#NAME?
	80-89		0.105378	0.0954723	7.10454	2580.93	0.674627	#NAME?	0.131722	0.11934	7.10454	2580.93	0.843284	#NAME?	1.36991	1.24114	7.10454	2580.93	8.77015	#NAME?	1.55432	1.40822	7.10454	2580.93	9.95075	#NAME?	6.84956	6.2057	7.10454	2580.93	43.8508	#NAME?	7.85065	7.11269	7.10454	2580.93	50.2597	#NAME?
	90+		0	0	3.45069	1246.36	0	#NAME?	0	0	3.45069	1246.36	0	#NAME?	0	0	3.45069	1246.36	0	#NAME?	0	0	3.45069	1246.36	0	#NAME?	0	0	3.45069	1246.36	0	#NAME?	0	0	3.45069	1246.36	0	#NAME?
	TOTAL		1.52212	1.37904			24.8912	#NAME?	1.90265	1.72381			31.114	#NAME?	19.7876	17.9276			323.585	#NAME?	22.4513	20.3409			367.145	#NAME?	98.9381	89.6379			1617.93	#NAME?	113.398	102.739			1854.39	#NAME?
Permanent
					SCENARIO 4A				SCENARIO 4B				SCENARIO 4C
					Scenario IA (Vaccinated)		Scenario IA (UNVaccinated)		Scenario IB (Vaccinated)		Scenario IB (UNVaccinated)		Scenario IC (Vaccinated)		Scenario IC (UNVaccinated)
			IHME 2019		COVID-19 consequences		COVID-19 consequences		COVID-19 consequences		COVID-19 consequences		COVID-19 consequences		COVID-19 consequences
					Base		Base		Base		Base		Base		Base
			Incidence Base	DALYS Base	Incidence	DALYS	Incidence	DALYS	Incidence	DALYS	Incidence	DALYS	Incidence	DALYS	Incidence	DALYS
1	Diabetes	587	69042.8	186528	#NAME?	#NAME?	#NAME?	#NAME?	#NAME?	#NAME?	#NAME?	#NAME?	#NAME?	#NAME?	#NAME?	#NAME?
2	Parkinsons	544	6598.01	38742.5	#NAME?	#NAME?	#NAME?	#NAME?	#NAME?	#NAME?	#NAME?	#NAME?	#NAME?	#NAME?	#NAME?	#NAME?
3	Dementia	543	43968.6	154293	#NAME?	#NAME?	#NAME?	#NAME?	#NAME?	#NAME?	#NAME?	#NAME?	#NAME?	#NAME?	#NAME?	#NAME?
4	Anxiety disorders	571	188750	139108	#NAME?	#NAME?	#NAME?	#NAME?	#NAME?	#NAME?	#NAME?	#NAME?	#NAME?	#NAME?	#NAME?	#NAME?
5	Ischemic Stroke	495	17984.1	114238	#NAME?	#NAME?	#NAME?	#NAME?	#NAME?	#NAME?	#NAME?	#NAME?	#NAME?	#NAME?	#NAME?	#NAME?
	Total with Diabetes					#NAME?		#NAME?		#NAME?		#NAME?		#NAME?		#NAME?
	Total without Diabetes					#NAME?		#NAME?		#NAME?		#NAME?		#NAME?		#NAME?
DALYS
			Scenario 4A_V (Vaccinated)							Scenario 4A_U (Unvaccinated)							Scenario 4B_V (Vaccinated)							Scenario 4B_U (Unvaccinated)							Scenario 4C_V (Vaccinated)							Scenario 4C_U (Unvaccinated)
			TOTAL DALYS				ERRUNOUTPUT			TOTAL DALYS				ERRUNOUTPUT			TOTAL DALYS				ERRUNOUTPUT			TOTAL DALYS				ERRUNOUTPUT			TOTAL DALYS				ERRUNOUTPUT			TOTAL DALYS				ERRUNOUTPUT
			YLL	YLD (Base)	DALYS	DALYS per 100,000 population				YLL	YLD (Base)	DALYS	DALYS per 100,000 population				YLL	YLD (Base)	DALYS	DALYS per 100,000 population				YLL	YLD (Base)	DALYS	DALYS per 100,000 population				YLL	YLD (Base)	DALYS	DALYS per 100,000 population				YLL	YLD (Base)	DALYS	DALYS per 100,000 population
	YLL_4AV		83.5293				#NAME?		YLL_4AU	198.382				#NAME?		YLL_4BV	1200.73				#NAME?		YLL_4BU	2704.26				#NAME?		YLL_4CV	5387.64				#NAME?		YLL_4CU	12132.6				#NAME?
	YLD_Acute_4AV			#NAME?			#NAME?		YLD_Acute_4AU		#NAME?			#NAME?		YLD_Acute_4BV		#NAME?			#NAME?		YLD_Acute_4BU		#NAME?			#NAME?		YLD_Acute_4CV		#NAME?			#NAME?		YLD_Acute_4CU		#NAME?			#NAME?
	YLD_Chronic_4AV			#NAME?			#NAME?		YLD_Chronic_4AU		#NAME?			#NAME?		YLD_Chronic_4BV		#NAME?			#NAME?		YLD_Chronic_4BU		#NAME?			#NAME?		YLD_Chronic_4CV		#NAME?			#NAME?		YLD_Chronic_4CU		#NAME?			#NAME?
	YLD_PICS_4AV			#NAME?			#NAME?		YLD_PICS_4AU		#NAME?			#NAME?		YLD_PICS_4BV		#NAME?			#NAME?		YLD_PICS_4BU		#NAME?			#NAME?		YLD_PICS_4CV		#NAME?			#NAME?		YLD_PICS_4CU		#NAME?			#NAME?
	DALY_Perm_Diab_4AV			#NAME?			#NAME?		DALY_Perm_Diab_4AU		#NAME?			#NAME?		DALY_Perm_Diab_4BV		#NAME?			#NAME?		DALY_Perm_Diab_4BU		#NAME?			#NAME?		DALY_Perm_Diab_4CV		#NAME?			#NAME?		DALY_Perm_Diab_4CU		#NAME?			#NAME?
	DALY_Perm_WoDiab_4AV			#NAME?			#NAME?		DALY_Perm_WoDiab_4AU		#NAME?			#NAME?		DALY_Perm_WoDiab_4BV		#NAME?			#NAME?		DALY_Perm_WoDiab_4BU		#NAME?			#NAME?		DALY_Perm_WoDiab_4CV		#NAME?			#NAME?		DALY_Perm_WoDiab_4CU		#NAME?			#NAME?
	TOTAL YLD Baseline_4AV			#NAME?		#NAME?	#NAME?		TOTAL YLD Baseline_4AU		#NAME?		#NAME?	#NAME?		TOTAL YLD Baseline_4BV		#NAME?		#NAME?	#NAME?		TOTAL YLD Baseline_4BU		#NAME?		#NAME?	#NAME?		TOTAL YLD Baseline_4CV		#NAME?		#NAME?	#NAME?		TOTAL YLD Baseline_4CU		#NAME?		#NAME?	#NAME?
	TOTAL YLD with Diabetes_4AV			#NAME?		#NAME?	#NAME?		TOTAL YLD with Diabetes_4AU		#NAME?		#NAME?	#NAME?		TOTAL YLD with Diabetes_4BV		#NAME?		#NAME?	#NAME?		TOTAL YLD with Diabetes_4BU		#NAME?		#NAME?	#NAME?		TOTAL YLD with Diabetes_4CV		#NAME?		#NAME?	#NAME?		TOTAL YLD with Diabetes_4CU		#NAME?		#NAME?	#NAME?
	TOTAL YLD without Diabetes_4AV			#NAME?		#NAME?	#NAME?		TOTAL YLD without Diabetes_4AU		#NAME?		#NAME?	#NAME?		TOTAL YLD without Diabetes_4BV		#NAME?		#NAME?	#NAME?		TOTAL YLD without Diabetes_4BU		#NAME?		#NAME?	#NAME?		TOTAL YLD without Diabetes_4CV		#NAME?		#NAME?	#NAME?		TOTAL YLD without Diabetes_4CU		#NAME?		#NAME?	#NAME?
	TOTAL DALYS Baseline_4AV				#NAME?	#NAME?	#NAME?		TOTAL DALYS Baseline_4AU			#NAME?	#NAME?	#NAME?		TOTAL DALYS Baseline_4BV			#NAME?	#NAME?	#NAME?		TOTAL DALYS Baseline_4BU			#NAME?	#NAME?	#NAME?		TOTAL DALYS Baseline_4CV			#NAME?	#NAME?	#NAME?		TOTAL DALYS Baseline_4CU			#NAME?	#NAME?	#NAME?
	Total DALY_D_4AV				#NAME?	#NAME?	#NAME?		Total DALY_D_4AU			#NAME?	#NAME?	#NAME?		Total DALY_D_4BV			#NAME?	#NAME?	#NAME?		Total DALY_D_4BU			#NAME?	#NAME?	#NAME?		Total DALY_D_4CV			#NAME?	#NAME?	#NAME?		Total DALY_D_4CU			#NAME?	#NAME?	#NAME?
	Total DALYS_WoD_4AV				#NAME?	#NAME?	#NAME?		Total DALYS_WoD_4AU			#NAME?	#NAME?	#NAME?		Total DALYS_WoD_4BV			#NAME?	#NAME?	#NAME?		Total DALYS_WoD_4BU			#NAME?	#NAME?	#NAME?		Total DALYS_WoD_4CV			#NAME?	#NAME?	#NAME?		Total DALYS_WoD_4CU			#NAME?	#NAME?	#NAME?
			Scenario 4A_Combined													Scenario 4B_Combined														Scenario 4C_Combined
			TOTAL DALYS				ERRUNOUTPUT										TOTAL DALYS				ERRUNOUTPUT										TOTAL DALYS				ERRUNOUTPUT
			YLL	YLD (Base)	DALYS	DALYS per 100,000 population											YLL	YLD (Base)	DALYS	DALYS per 100,000 population											YLL	YLD (Base)	DALYS	DALYS per 100,000 population
	YLL_4A_Combined		#NAME?				#NAME?									YLL_4B_Combined	#NAME?				#NAME?									YLL_4C_Combined	#NAME?				#NAME?
	YLD_Acute_4A_Combined			#NAME?			#NAME?									YLD_Acute_4B_Combined		#NAME?			#NAME?									YLD_Acute_4C_Combined		#NAME?			#NAME?
	YLD_Chronic_4A_Combined			#NAME?			#NAME?									YLD_Chronic_4B_Combined		#NAME?			#NAME?									YLD_Chronic_4C_Combined		#NAME?			#NAME?
	YLD_PICS_4A_Combined			#NAME?			#NAME?									YLD_PICS_4B_Combined		#NAME?			#NAME?									YLD_PICS_4C_Combined		#NAME?			#NAME?
	DALY_Perm_Diab_4A_Combined			#NAME?			#NAME?									DALY_Perm_Diab_4B_Combined		#NAME?			#NAME?									DALY_Perm_Diab_4C_Combined		#NAME?			#NAME?
	DALY_Perm_WoDiab_4A_Combined			#NAME?			#NAME?									DALY_Perm_WoDiab_4B_Combined		#NAME?			#NAME?									DALY_Perm_WoDiab_4C_Combined		#NAME?			#NAME?
	TOTAL YLD Baseline_4A_Combined			#NAME?		#NAME?	#NAME?									TOTAL YLD Baseline_4B_Combined		#NAME?		#NAME?	#NAME?									TOTAL YLD Baseline_4C_Combined		#NAME?		#NAME?	#NAME?
	TOTAL YLD with Diabetes_4A_Combined			#NAME?		#NAME?	#NAME?									TOTAL YLD with Diabetes_4B_Combined		#NAME?		#NAME?	#NAME?									TOTAL YLD with Diabetes_4C_Combined		#NAME?		#NAME?	#NAME?
	TOTAL YLD without Diabetes_4A_Combined			#NAME?		#NAME?	#NAME?									TOTAL YLD without Diabetes_4B_Combined		#NAME?		#NAME?	#NAME?									TOTAL YLD without Diabetes_4C_Combined		#NAME?		#NAME?	#NAME?
	TOTAL DALYS Baseline_4A_Combined				#NAME?	#NAME?	#NAME?									TOTAL DALYS Baseline_4B_Combined			#NAME?	#NAME?	#NAME?									TOTAL DALYS Baseline_4C_Combined			#NAME?	#NAME?	#NAME?
	Total DALY_D_4A_Combined				#NAME?	#NAME?	#NAME?									Total DALY_D_4B_Combined			#NAME?	#NAME?	#NAME?									Total DALY_D_4C_Combined			#NAME?	#NAME?	#NAME?
	Total DALYS_WoD_4A_Combined				#NAME?	#NAME?	#NAME?									Total DALYS_WoD_4B_Combined			#NAME?	#NAME?	#NAME?									Total DALYS_WoD_4C_Combined			#NAME?	#NAME?	#NAME?

## Sheet: Scenario I NSW
DALYS Calculation (Scenario 1: 70% and low seeding infections assuming different combinations of PHSMs and TTIQ effectiveness)
Back to "read me"
Mortality (YLL)
				DEATH						YLL
	Age	Mid	LETotals	Scenario IA_V (Vaccinated)	Scenario IA_U (Unvaccinated)	Scenario IB_V (Vaccinated)	Scenario IB_U (Unvaccinated)	Scenario IC_V (Vaccinated)	Scenario IC_U (Unvaccinated)	Scenario IA_V (Vaccinated)	Scenario IA_U (Unvaccinated)	Scenario IB_V (Vaccinated)	Scenario IB_U (Unvaccinated)	Scenario IC_V (Vaccinated)	Scenario IC_U (Unvaccinated)
	0-9	5	78.2138	0	0	0	0	0	0	0	0	0	0	0	0
	10-19	15	68.2659	1.41622	2.94109	0.0252487	0.0558531	0.00994644	0.0221882	96.6795	200.776	1.72362	3.81286	0.679002	1.5147
	20-29	25	58.5115	9.91354	20.5876	0.176741	0.390972	0.0696251	0.155318	580.057	1204.61	10.3414	22.8764	4.07387	9.08787
	30-39	35	48.8546	12.746	26.4698	0.227238	0.502678	0.089518	0.199694	622.699	1293.17	11.1016	24.5581	4.37336	9.75596
	40-49	45	39.3018	29.7406	61.7628	0.530222	1.17292	0.208875	0.465953	1168.86	2427.39	20.8387	46.0976	8.20917	18.3128
	50-59	55	30.0933	77.8921	161.76	1.38868	3.07192	0.547054	1.22035	2344.03	4867.88	41.7898	92.4442	16.4627	36.7244
	60-69	65	21.403	133.125	276.462	2.37337	5.25019	0.934966	2.08569	2849.26	5917.11	50.7972	112.37	20.011	44.64
	70-79	75	13.4485	356.888	741.154	6.36266	14.075	2.5065	5.59143	4799.6	9967.41	85.5683	189.287	33.7087	75.1964
	80-89	85	7.10454	718.024	1491.13	12.8011	28.3175	5.04285	11.2494	5101.23	10593.8	90.9457	201.183	35.8271	79.922
	90-100	95	3.45069	511.256	1061.73	9.11477	20.163	3.59067	8.00995	1764.18	3663.7	31.4522	69.5761	12.3903	27.6398
	weighted mean/Total			1851	3844	33	73	13	29	19326.6	40135.8	344.558	762.205	135.735	302.794
Morbidity (YLD)
PARAMETERS
AUSTALIAN POPULATION			Scenario IA_V (Vaccinated)	Scenario IA_U (Unvaccinated)	Scenario IB_V (Vaccinated)	Scenario IB_U (Unvaccinated)	Scenario IC_V (Vaccinated)	Scenario IC_U (Unvaccinated)			Scenario IA_V (Vaccinated)	Scenario IA_U (Unvaccinated)	Scenario IB_V (Vaccinated)	Scenario IB_U (Unvaccinated)	Scenario IC_V (Vaccinated)	Scenario IC_U (Unvaccinated)		PICS:ICU Survival	Scenario IA_V (Vaccinated)	Scenario IA_U (Unvaccinated)	Scenario IB_V (Vaccinated)	Scenario IB_U (Unvaccinated)	Scenario IC_V (Vaccinated)	Scenario IC_U (Unvaccinated)
Australian COVID case (without death)			138896	727636	2897	18788	1100	6871		Mild/Moderate	128997	702887	2710	18243	1028	6656		60-69	282.313	310.739	4.61613	5.10204	1.94364	2.18659
Australian poulation as of 31Dec2020 (e)			25694393	25694393	25694393	25694393	25694393	25694393		Severe	9431	23680	182	524	68	203		70-79	129.252	142.266	2.11341	2.33587	0.889857	1.00109
Australian COVID case with deaths			140747	731480	2930	18861	1113	6900		Critical	2319	4913	38	94	17	41		80-89	30.6123	33.6946	0.500545	0.553233	0.210756	0.2371
Ausrtalian COVID cases (>10 and above)			138896	398065	2897	10051.9	1100	3841.88										90+	0	0	0	0	0	0
Australian COVID cases (Hosp without death; >30 years old)			106880	158676	2174.83	3830.5	813	1515.33										Totals	442.177	486.699	7.23009	7.99115	3.04425	3.42478
YEAR			365.25
DISABILITY WEIGHTS (g)			MID	LL	UL	sigma	alpha1	alpha2	ERSATZ
DW(Moderate)			0.051	0.032	0.074	0.0107143	21.4511	399.158	#NAME?
DW(Severe)			0.133	0.088	0.19	0.0260204	22.5184	146.793	#NAME?
DW(Critical)			0.655	0.579	0.727	0.0377551	103.182	54.3476	#NAME?
DW(Chronic)			0.219	0.148	0.308	0.0408163	22.2649	79.4013	#NAME?
DW(Afib as proxy for PICS) (i)			0.224	0.151	0.312	0.0410714	22.8582	79.1875	#NAME?
SEVERITY DISTRIBUTION
ACUTE (Proportion)			%	Duration (days)
N Asymptomatic (will not be added in the YLD) (h)			NA	14
N(Moderate) (a)			NA	14
N(Severe) (a)			NA	14
N(Critical)* (a)			NA	14
CHRONIC			%	Duration (days)		OR	95%CI LL	95%CI UL	RR	LL	UL	SE	ERSATZ
Post (acute) after symptomatic duration to 2 years			See ONS Post-Acute Sheet		Treatment effect of full dose of COVID vaccine	0.51	0.32	0.82	0.540174	0.346891	0.837179	0.0923705	#NAME?
Post-intesive care syndrome			%	Duration (days)
1) PICS			0.906	RLE
Permanent functional impairment			%	LL	UL		Duration	sigma	alpha1	alpha2	ERSATZ
2) Diabetes			0.0282921	0.0256649	0.0312028		RLE	0.00141273	389.685	13384	#NAME?
3) Parkinsons			0.0011	0.00079	0.0014		RLE	0.000155612	49.9126	45325.2	#NAME?
4) Dementia			0.0067	0.0059	0.0075		RLE	0.000408163	267.64	39678.7	#NAME?
5) Anxiety Disorders			0.0711	0.0682	0.0741		RLE	0.0015051	2072.82	27080.8	#NAME?
5) Ischaemic Stroke			0.0076	0.0068	0.0085		RLE	0.000433673	304.774	39797	#NAME?
ACUTE
Morbidity calculation (Total incidence cases/Checking/Scenario analysis)
			Scenario 1A						Scenario IB						Scenario IC
			Scenario IA_V (Vaccinated)			Scenario IA_U (Unvaccinated)			Scenario IB_V (Vaccinated)			Scenario IB_U (Unvaccinated)			Scenario IC_V (Vaccinated)			Scenario IC_U (Unvaccinated)
				Case (Person - years)	YLD		Case (Person - years)	YLD		Case (Person - years)	YLD		Case (Person - years)	YLD		Case (Person - years)	YLD		Case (Person - years)	YLD
			Base	Base	Base DL	Base	Base	Base DL	Base	Base	Base DL	Base	Base	Base DL	Base	Base	Base DL	Base	Base	Base DL
	Moderate		128997	4944.44	#NAME?	702887	26941.6	#NAME?	2710	103.874	#NAME?	18243	699.253	#NAME?	1028	39.4031	#NAME?	6656	255.124	#NAME?
	Severe		9431	361.489	#NAME?	23680	907.652	#NAME?	182	6.97604	#NAME?	524	20.0849	#NAME?	68	2.60643	#NAME?	203	7.78097	#NAME?
	Critical		2319	88.8871	#NAME?	4913	188.315	#NAME?	38	1.45654	#NAME?	94	3.60301	#NAME?	17	0.651608	#NAME?	41	1.57153	#NAME?
	TOTAL				#NAME?			#NAME?			#NAME?			#NAME?			#NAME?			#NAME?
CHRONIC/LONG COVID
										SCENARIO IA								SCENARIO IB								SCENARIO IC
			NSW			ERSATZ				Scenario IA_V (Vaccinated)				Scenario IA_U (Unvaccinated)				Scenario IB_V (Vaccinated)				Scenario IB_U (Unvaccinated)				Scenario IC_V (Vaccinated)				Scenario IC_U (Unvaccinated)
	weeks		Baseline	LL	UL	sigma	alpha1	alpha2	Ersazt	Recalculation (mutually exclusive)	Incidence	DALYs/year	DALYS per 100,000	Recalculation (mutually exclusive)	Incidence	DALYs/year	DALYS per 100,000	Recalculation (mutually exclusive)	Incidence	DALYs/year	DALYS per 100,000	Recalculation (mutually exclusive)	Incidence	DALYs/year	DALYS per 100,000	Recalculation (mutually exclusive)	Incidence	DALYs/year	DALYS per 100,000	Recalculation (mutually exclusive)	Incidence	DALYs/year	DALYS per 100,000
	0		0.5629	0.5997	0.5276	-0.0183929	408.834	317.466	#NAME?	#NAME?	#NAME?	#NAME?	#NAME?	#NAME?	#NAME?	#NAME?	#NAME?	#NAME?	#NAME?	#NAME?	#NAME?	#NAME?	#NAME?	#NAME?	#NAME?	#NAME?	#NAME?	#NAME?	#NAME?	#NAME?	#NAME?	#NAME?	#NAME?
	1		0.47395	0.491484	0.45593	-0.00907002	1435.93	1593.77	#NAME?	#NAME?	#NAME?	#NAME?	#NAME?	#NAME?	#NAME?	#NAME?	#NAME?	#NAME?	#NAME?	#NAME?	#NAME?	#NAME?	#NAME?	#NAME?	#NAME?	#NAME?	#NAME?	#NAME?	#NAME?	#NAME?	#NAME?	#NAME?	#NAME?
	2		0.399056	0.402796	0.393995	-0.00224506	18986.1	28591.5	#NAME?	#NAME?	#NAME?	#NAME?	#NAME?	#NAME?	#NAME?	#NAME?	#NAME?	#NAME?	#NAME?	#NAME?	#NAME?	#NAME?	#NAME?	#NAME?	#NAME?	#NAME?	#NAME?	#NAME?	#NAME?	#NAME?	#NAME?	#NAME?	#NAME?
	3		0.335997	0.330111	0.340474	0.00264354	10726.4	21197.7	#NAME?	#NAME?	#NAME?	#NAME?	#NAME?	#NAME?	#NAME?	#NAME?	#NAME?	#NAME?	#NAME?	#NAME?	#NAME?	#NAME?	#NAME?	#NAME?	#NAME?	#NAME?	#NAME?	#NAME?	#NAME?	#NAME?	#NAME?	#NAME?	#NAME?
	4		0.282902	0.270543	0.294223	0.00604095	1572.4	3985.69	#NAME?	#NAME?	#NAME?	#NAME?	#NAME?	#NAME?	#NAME?	#NAME?	#NAME?	#NAME?	#NAME?	#NAME?	#NAME?	#NAME?	#NAME?	#NAME?	#NAME?	#NAME?	#NAME?	#NAME?	#NAME?	#NAME?	#NAME?	#NAME?	#NAME?
	5		0.238198	0.221723	0.254255	0.00829899	627.34	2006.35	#NAME?	#NAME?	#NAME?	#NAME?	#NAME?	#NAME?	#NAME?	#NAME?	#NAME?	#NAME?	#NAME?	#NAME?	#NAME?	#NAME?	#NAME?	#NAME?	#NAME?	#NAME?	#NAME?	#NAME?	#NAME?	#NAME?	#NAME?	#NAME?	#NAME?
	6		0.200558	0.181713	0.219717	0.00969474	341.931	1362.97	#NAME?	#NAME?	#NAME?	#NAME?	#NAME?	#NAME?	#NAME?	#NAME?	#NAME?	#NAME?	#NAME?	#NAME?	#NAME?	#NAME?	#NAME?	#NAME?	#NAME?	#NAME?	#NAME?	#NAME?	#NAME?	#NAME?	#NAME?	#NAME?	#NAME?
	7		0.168865	0.148923	0.18987	0.0104456	217.044	1068.26	#NAME?	#NAME?	#NAME?	#NAME?	#NAME?	#NAME?	#NAME?	#NAME?	#NAME?	#NAME?	#NAME?	#NAME?	#NAME?	#NAME?	#NAME?	#NAME?	#NAME?	#NAME?	#NAME?	#NAME?	#NAME?	#NAME?	#NAME?	#NAME?	#NAME?
	8		0.142181	0.12205	0.164077	0.0107213	150.721	909.342	#NAME?	#NAME?	#NAME?	#NAME?	#NAME?	#NAME?	#NAME?	#NAME?	#NAME?	#NAME?	#NAME?	#NAME?	#NAME?	#NAME?	#NAME?	#NAME?	#NAME?	#NAME?	#NAME?	#NAME?	#NAME?	#NAME?	#NAME?	#NAME?	#NAME?
	9		0.119714	0.100026	0.141789	0.0106538	111.029	816.424	#NAME?	#NAME?	#NAME?	#NAME?	#NAME?	#NAME?	#NAME?	#NAME?	#NAME?	#NAME?	#NAME?	#NAME?	#NAME?	#NAME?	#NAME?	#NAME?	#NAME?	#NAME?	#NAME?	#NAME?	#NAME?	#NAME?	#NAME?	#NAME?	#NAME?
	10		0.100796	0.0819762	0.122528	0.0103448	85.2688	760.683	#NAME?	#NAME?	#NAME?	#NAME?	#NAME?	#NAME?	#NAME?	#NAME?	#NAME?	#NAME?	#NAME?	#NAME?	#NAME?	#NAME?	#NAME?	#NAME?	#NAME?	#NAME?	#NAME?	#NAME?	#NAME?	#NAME?	#NAME?	#NAME?	#NAME?
	11		0.0848684	0.0671836	0.105883	0.00987239	67.5438	728.322	#NAME?	#NAME?	#NAME?	#NAME?	#NAME?	#NAME?	#NAME?	#NAME?	#NAME?	#NAME?	#NAME?	#NAME?	#NAME?	#NAME?	#NAME?	#NAME?	#NAME?	#NAME?	#NAME?	#NAME?	#NAME?	#NAME?	#NAME?	#NAME?	#NAME?
	12		0.0714574	0.0550603	0.0914999	0.00929582	54.7968	712.049	#NAME?	#NAME?	#NAME?	#NAME?	#NAME?	#NAME?	#NAME?	#NAME?	#NAME?	#NAME?	#NAME?	#NAME?	#NAME?	#NAME?	#NAME?	#NAME?	#NAME?	#NAME?	#NAME?	#NAME?	#NAME?	#NAME?	#NAME?	#NAME?	#NAME?
	13		0.0601657	0.0451247	0.0790704	0.00865962	45.308	707.747	#NAME?	#NAME?	#NAME?	#NAME?	#NAME?	#NAME?	#NAME?	#NAME?	#NAME?	#NAME?	#NAME?	#NAME?	#NAME?	#NAME?	#NAME?	#NAME?	#NAME?	#NAME?	#NAME?	#NAME?	#NAME?	#NAME?	#NAME?	#NAME?	#NAME?
	14		0.0506582	0.0369819	0.0683293	0.00799677	38.0466	712.997	#NAME?	#NAME?	#NAME?	#NAME?	#NAME?	#NAME?	#NAME?	#NAME?	#NAME?	#NAME?	#NAME?	#NAME?	#NAME?	#NAME?	#NAME?	#NAME?	#NAME?	#NAME?	#NAME?	#NAME?	#NAME?	#NAME?	#NAME?	#NAME?	#NAME?
	15		0.0426532	0.0303085	0.0590473	0.00733131	32.3621	726.365	#NAME?	#NAME?	#NAME?	#NAME?	#NAME?	#NAME?	#NAME?	#NAME?	#NAME?	#NAME?	#NAME?	#NAME?	#NAME?	#NAME?	#NAME?	#NAME?	#NAME?	#NAME?	#NAME?	#NAME?	#NAME?	#NAME?	#NAME?	#NAME?	#NAME?
	16		0.0359131	0.0248394	0.0510262	0.00668031	27.8272	747.02	#NAME?	#NAME?	#NAME?	#NAME?	#NAME?	#NAME?	#NAME?	#NAME?	#NAME?	#NAME?	#NAME?	#NAME?	#NAME?	#NAME?	#NAME?	#NAME?	#NAME?	#NAME?	#NAME?	#NAME?	#NAME?	#NAME?	#NAME?	#NAME?	#NAME?
	17		0.0302381	0.0203571	0.0440946	0.0060555	24.1507	774.535	#NAME?	#NAME?	#NAME?	#NAME?	#NAME?	#NAME?	#NAME?	#NAME?	#NAME?	#NAME?	#NAME?	#NAME?	#NAME?	#NAME?	#NAME?	#NAME?	#NAME?	#NAME?	#NAME?	#NAME?	#NAME?	#NAME?	#NAME?	#NAME?	#NAME?
	18		0.0254598	0.0166837	0.0381047	0.00546456	21.1289	808.764	#NAME?	#NAME?	#NAME?	#NAME?	#NAME?	#NAME?	#NAME?	#NAME?	#NAME?	#NAME?	#NAME?	#NAME?	#NAME?	#NAME?	#NAME?	#NAME?	#NAME?	#NAME?	#NAME?	#NAME?	#NAME?	#NAME?	#NAME?	#NAME?	#NAME?
	19		0.0214366	0.0136731	0.0329285	0.00491209	18.6153	849.77	#NAME?	#NAME?	#NAME?	#NAME?	#NAME?	#NAME?	#NAME?	#NAME?	#NAME?	#NAME?	#NAME?	#NAME?	#NAME?	#NAME?	#NAME?	#NAME?	#NAME?	#NAME?	#NAME?	#NAME?	#NAME?	#NAME?	#NAME?	#NAME?	#NAME?
	20		0.0180492	0.0112058	0.0284554	0.00440042	16.5023	897.791	#NAME?	#NAME?	#NAME?	#NAME?	#NAME?	#NAME?	#NAME?	#NAME?	#NAME?	#NAME?	#NAME?	#NAME?	#NAME?	#NAME?	#NAME?	#NAME?	#NAME?	#NAME?	#NAME?	#NAME?	#NAME?	#NAME?	#NAME?	#NAME?	#NAME?
	21		0.0151971	0.00918369	0.02459	0.00393017	14.7095	953.206	#NAME?	#NAME?	#NAME?	#NAME?	#NAME?	#NAME?	#NAME?	#NAME?	#NAME?	#NAME?	#NAME?	#NAME?	#NAME?	#NAME?	#NAME?	#NAME?	#NAME?	#NAME?	#NAME?	#NAME?	#NAME?	#NAME?	#NAME?	#NAME?	#NAME?
	22		0.0127956	0.0075265	0.0212496	0.00350079	13.1757	1016.53	#NAME?	#NAME?	#NAME?	#NAME?	#NAME?	#NAME?	#NAME?	#NAME?	#NAME?	#NAME?	#NAME?	#NAME?	#NAME?	#NAME?	#NAME?	#NAME?	#NAME?	#NAME?	#NAME?	#NAME?	#NAME?	#NAME?	#NAME?	#NAME?	#NAME?
	23		0.0107736	0.00616834	0.018363	0.00311089	11.8538	1088.41	#NAME?	#NAME?	#NAME?	#NAME?	#NAME?	#NAME?	#NAME?	#NAME?	#NAME?	#NAME?	#NAME?	#NAME?	#NAME?	#NAME?	#NAME?	#NAME?	#NAME?	#NAME?	#NAME?	#NAME?	#NAME?	#NAME?	#NAME?	#NAME?	#NAME?
	24		0.00907118	0.00505526	0.0158685	0.00275849	10.7068	1169.6	#NAME?	#NAME?	#NAME?	#NAME?	#NAME?	#NAME?	#NAME?	#NAME?	#NAME?	#NAME?	#NAME?	#NAME?	#NAME?	#NAME?	#NAME?	#NAME?	#NAME?	#NAME?	#NAME?	#NAME?	#NAME?	#NAME?	#NAME?	#NAME?	#NAME?
	25		0.00763774	0.00414304	0.0137129	0.0024413	9.70549	1261.02	#NAME?	#NAME?	#NAME?	#NAME?	#NAME?	#NAME?	#NAME?	#NAME?	#NAME?	#NAME?	#NAME?	#NAME?	#NAME?	#NAME?	#NAME?	#NAME?	#NAME?	#NAME?	#NAME?	#NAME?	#NAME?	#NAME?	#NAME?	#NAME?	#NAME?
	26		0.00643082	0.00339543	0.0118501	0.00215681	8.82654	1363.71	#NAME?	#NAME?	#NAME?	#NAME?	#NAME?	#NAME?	#NAME?	#NAME?	#NAME?	#NAME?	#NAME?	#NAME?	#NAME?	#NAME?	#NAME?	#NAME?	#NAME?	#NAME?	#NAME?	#NAME?	#NAME?	#NAME?	#NAME?	#NAME?	#NAME?
	27		0.00541462	0.00278272	0.0102404	0.00190246	8.05106	1478.86	#NAME?	#NAME?	#NAME?	#NAME?	#NAME?	#NAME?	#NAME?	#NAME?	#NAME?	#NAME?	#NAME?	#NAME?	#NAME?	#NAME?	#NAME?	#NAME?	#NAME?	#NAME?	#NAME?	#NAME?	#NAME?	#NAME?	#NAME?	#NAME?	#NAME?
	28		0.00455899	0.00228058	0.0088493	0.00167569	7.36369	1607.84	#NAME?	#NAME?	#NAME?	#NAME?	#NAME?	#NAME?	#NAME?	#NAME?	#NAME?	#NAME?	#NAME?	#NAME?	#NAME?	#NAME?	#NAME?	#NAME?	#NAME?	#NAME?	#NAME?	#NAME?	#NAME?	#NAME?	#NAME?	#NAME?	#NAME?
	29		0.00383858	0.00186905	0.00764719	0.00147402	6.75179	1752.18	#NAME?	#NAME?	#NAME?	#NAME?	#NAME?	#NAME?	#NAME?	#NAME?	#NAME?	#NAME?	#NAME?	#NAME?	#NAME?	#NAME?	#NAME?	#NAME?	#NAME?	#NAME?	#NAME?	#NAME?	#NAME?	#NAME?	#NAME?	#NAME?	#NAME?
	30		0.003232	0.00153178	0.00660838	0.00129505	6.20494	1913.64	#NAME?	#NAME?	#NAME?	#NAME?	#NAME?	#NAME?	#NAME?	#NAME?	#NAME?	#NAME?	#NAME?	#NAME?	#NAME?	#NAME?	#NAME?	#NAME?	#NAME?	#NAME?	#NAME?	#NAME?	#NAME?	#NAME?	#NAME?	#NAME?	#NAME?
	31		0.00272128	0.00125537	0.00571068	0.00113656	5.71441	2094.19	#NAME?	#NAME?	#NAME?	#NAME?	#NAME?	#NAME?	#NAME?	#NAME?	#NAME?	#NAME?	#NAME?	#NAME?	#NAME?	#NAME?	#NAME?	#NAME?	#NAME?	#NAME?	#NAME?	#NAME?	#NAME?	#NAME?	#NAME?	#NAME?	#NAME?
	32		0.00229126	0.00102884	0.00493493	0.000996452	5.27292	2296.05	#NAME?	#NAME?	#NAME?	#NAME?	#NAME?	#NAME?	#NAME?	#NAME?	#NAME?	#NAME?	#NAME?	#NAME?	#NAME?	#NAME?	#NAME?	#NAME?	#NAME?	#NAME?	#NAME?	#NAME?	#NAME?	#NAME?	#NAME?	#NAME?	#NAME?
	33		0.00192919	0.000843184	0.00426456	0.000872799	4.8743	2521.72	#NAME?	#NAME?	#NAME?	#NAME?	#NAME?	#NAME?	#NAME?	#NAME?	#NAME?	#NAME?	#NAME?	#NAME?	#NAME?	#NAME?	#NAME?	#NAME?	#NAME?	#NAME?	#NAME?	#NAME?	#NAME?	#NAME?	#NAME?	#NAME?	#NAME?
	34		0.00162434	0.000691031	0.00368525	0.000763831	4.51333	2774.05	#NAME?	#NAME?	#NAME?	#NAME?	#NAME?	#NAME?	#NAME?	#NAME?	#NAME?	#NAME?	#NAME?	#NAME?	#NAME?	#NAME?	#NAME?	#NAME?	#NAME?	#NAME?	#NAME?	#NAME?	#NAME?	#NAME?	#NAME?	#NAME?	#NAME?
	35		0.00136766	0.000566334	0.00318464	0.000667934	4.18555	3056.19	#NAME?	#NAME?	#NAME?	#NAME?	#NAME?	#NAME?	#NAME?	#NAME?	#NAME?	#NAME?	#NAME?	#NAME?	#NAME?	#NAME?	#NAME?	#NAME?	#NAME?	#NAME?	#NAME?	#NAME?	#NAME?	#NAME?	#NAME?	#NAME?	#NAME?
	36		0.00115154	0.000464139	0.00275203	0.000583645	3.88716	3371.73	#NAME?	#NAME?	#NAME?	#NAME?	#NAME?	#NAME?	#NAME?	#NAME?	#NAME?	#NAME?	#NAME?	#NAME?	#NAME?	#NAME?	#NAME?	#NAME?	#NAME?	#NAME?	#NAME?	#NAME?	#NAME?	#NAME?	#NAME?	#NAME?	#NAME?
	37		0.000969574	0.000380385	0.00237819	0.000509643	3.61486	3724.68	#NAME?	#NAME?	#NAME?	#NAME?	#NAME?	#NAME?	#NAME?	#NAME?	#NAME?	#NAME?	#NAME?	#NAME?	#NAME?	#NAME?	#NAME?	#NAME?	#NAME?	#NAME?	#NAME?	#NAME?	#NAME?	#NAME?	#NAME?	#NAME?	#NAME?
	38		0.000816361	0.000311745	0.00205513	0.000444741	3.36582	4119.59	#NAME?	#NAME?	#NAME?	#NAME?	#NAME?	#NAME?	#NAME?	#NAME?	#NAME?	#NAME?	#NAME?	#NAME?	#NAME?	#NAME?	#NAME?	#NAME?	#NAME?	#NAME?	#NAME?	#NAME?	#NAME?	#NAME?	#NAME?	#NAME?	#NAME?
	39		0.000687359	0.00025549	0.00177596	0.000387874	3.13757	4561.53	#NAME?	#NAME?	#NAME?	#NAME?	#NAME?	#NAME?	#NAME?	#NAME?	#NAME?	#NAME?	#NAME?	#NAME?	#NAME?	#NAME?	#NAME?	#NAME?	#NAME?	#NAME?	#NAME?	#NAME?	#NAME?	#NAME?	#NAME?	#NAME?	#NAME?
	40		0.000578742	0.000209387	0.00153471	0.000338091	2.92796	5056.25	#NAME?	#NAME?	#NAME?	#NAME?	#NAME?	#NAME?	#NAME?	#NAME?	#NAME?	#NAME?	#NAME?	#NAME?	#NAME?	#NAME?	#NAME?	#NAME?	#NAME?	#NAME?	#NAME?	#NAME?	#NAME?	#NAME?	#NAME?	#NAME?	#NAME?
	41		0.000487289	0.000171603	0.00132623	0.000294547	2.73511	5610.18	#NAME?	#NAME?	#NAME?	#NAME?	#NAME?	#NAME?	#NAME?	#NAME?	#NAME?	#NAME?	#NAME?	#NAME?	#NAME?	#NAME?	#NAME?	#NAME?	#NAME?	#NAME?	#NAME?	#NAME?	#NAME?	#NAME?	#NAME?	#NAME?	#NAME?
	42		0.000410287	0.000140637	0.00114607	0.000256488	2.55737	6230.58	#NAME?	#NAME?	#NAME?	#NAME?	#NAME?	#NAME?	#NAME?	#NAME?	#NAME?	#NAME?	#NAME?	#NAME?	#NAME?	#NAME?	#NAME?	#NAME?	#NAME?	#NAME?	#NAME?	#NAME?	#NAME?	#NAME?	#NAME?	#NAME?	#NAME?
	43		0.000345453	0.000115259	0.000990385	0.000223246	2.3933	6925.61	#NAME?	#NAME?	#NAME?	#NAME?	#NAME?	#NAME?	#NAME?	#NAME?	#NAME?	#NAME?	#NAME?	#NAME?	#NAME?	#NAME?	#NAME?	#NAME?	#NAME?	#NAME?	#NAME?	#NAME?	#NAME?	#NAME?	#NAME?	#NAME?	#NAME?
	44		0.000290864	9.44608e-05	0.000855849	0.000194232	2.2416	7704.45	#NAME?	#NAME?	#NAME?	#NAME?	#NAME?	#NAME?	#NAME?	#NAME?	#NAME?	#NAME?	#NAME?	#NAME?	#NAME?	#NAME?	#NAME?	#NAME?	#NAME?	#NAME?	#NAME?	#NAME?	#NAME?	#NAME?	#NAME?	#NAME?	#NAME?
	45		0.000244902	7.74153e-05	0.000739588	0.000168922	2.10115	8577.44	#NAME?	#NAME?	#NAME?	#NAME?	#NAME?	#NAME?	#NAME?	#NAME?	#NAME?	#NAME?	#NAME?	#NAME?	#NAME?	#NAME?	#NAME?	#NAME?	#NAME?	#NAME?	#NAME?	#NAME?	#NAME?	#NAME?	#NAME?	#NAME?	#NAME?
	46		0.000206202	6.34457e-05	0.000639121	0.000146856	1.97092	9556.21	#NAME?	#NAME?	#NAME?	#NAME?	#NAME?	#NAME?	#NAME?	#NAME?	#NAME?	#NAME?	#NAME?	#NAME?	#NAME?	#NAME?	#NAME?	#NAME?	#NAME?	#NAME?	#NAME?	#NAME?	#NAME?	#NAME?	#NAME?	#NAME?	#NAME?
	47		0.000173618	5.19969e-05	0.000552301	0.000127629	1.85002	10653.9	#NAME?	#NAME?	#NAME?	#NAME?	#NAME?	#NAME?	#NAME?	#NAME?	#NAME?	#NAME?	#NAME?	#NAME?	#NAME?	#NAME?	#NAME?	#NAME?	#NAME?	#NAME?	#NAME?	#NAME?	#NAME?	#NAME?	#NAME?	#NAME?	#NAME?
	48		0.000146183	4.26141e-05	0.000477275	0.000110883	1.73765	11885.1	#NAME?	#NAME?	#NAME?	#NAME?	#NAME?	#NAME?	#NAME?	#NAME?	#NAME?	#NAME?	#NAME?	#NAME?	#NAME?	#NAME?	#NAME?	#NAME?	#NAME?	#NAME?	#NAME?	#NAME?	#NAME?	#NAME?	#NAME?	#NAME?	#NAME?
	49		0.000123083	3.49244e-05	0.000412441	9.63053e-05	1.63308	13266.5	#NAME?	#NAME?	#NAME?	#NAME?	#NAME?	#NAME?	#NAME?	#NAME?	#NAME?	#NAME?	#NAME?	#NAME?	#NAME?	#NAME?	#NAME?	#NAME?	#NAME?	#NAME?	#NAME?	#NAME?	#NAME?	#NAME?	#NAME?	#NAME?	#NAME?
	50		0.000103633	2.86223e-05	0.000356414	8.36204e-05	1.53567	14816.8	#NAME?	#NAME?	#NAME?	#NAME?	#NAME?	#NAME?	#NAME?	#NAME?	#NAME?	#NAME?	#NAME?	#NAME?	#NAME?	#NAME?	#NAME?	#NAME?	#NAME?	#NAME?	#NAME?	#NAME?	#NAME?	#NAME?	#NAME?	#NAME?	#NAME?
	51		8.7257e-05	2.34574e-05	0.000307998	7.25869e-05	1.44484	16557	#NAME?	#NAME?	#NAME?	#NAME?	#NAME?	#NAME?	#NAME?	#NAME?	#NAME?	#NAME?	#NAME?	#NAME?	#NAME?	#NAME?	#NAME?	#NAME?	#NAME?	#NAME?	#NAME?	#NAME?	#NAME?	#NAME?	#NAME?	#NAME?	#NAME?
	52		7.34685e-05	1.92245e-05	0.000266159	6.29935e-05	1.36005	18510.7	#NAME?	#NAME?	#NAME?	#NAME?	#NAME?	#NAME?	#NAME?	#NAME?	#NAME?	#NAME?	#NAME?	#NAME?	#NAME?	#NAME?	#NAME?	#NAME?	#NAME?	#NAME?	#NAME?	#NAME?	#NAME?	#NAME?	#NAME?	#NAME?	#NAME?
	53		6.1859e-05	1.57554e-05	0.000230003	5.46551e-05	1.28085	20704.6	#NAME?	#NAME?	#NAME?	#NAME?	#NAME?	#NAME?	#NAME?	#NAME?	#NAME?	#NAME?	#NAME?	#NAME?	#NAME?	#NAME?	#NAME?	#NAME?	#NAME?	#NAME?	#NAME?	#NAME?	#NAME?	#NAME?	#NAME?	#NAME?	#NAME?
	54		5.2084e-05	1.29124e-05	0.000198759	4.74099e-05	1.20678	23168.7	#NAME?	#NAME?	#NAME?	#NAME?	#NAME?	#NAME?	#NAME?	#NAME?	#NAME?	#NAME?	#NAME?	#NAME?	#NAME?	#NAME?	#NAME?	#NAME?	#NAME?	#NAME?	#NAME?	#NAME?	#NAME?	#NAME?	#NAME?	#NAME?	#NAME?
	55		4.38536e-05	1.05823e-05	0.000171759	4.11166e-05	1.13747	25936.8	#NAME?	#NAME?	#NAME?	#NAME?	#NAME?	#NAME?	#NAME?	#NAME?	#NAME?	#NAME?	#NAME?	#NAME?	#NAME?	#NAME?	#NAME?	#NAME?	#NAME?	#NAME?	#NAME?	#NAME?	#NAME?	#NAME?	#NAME?	#NAME?	#NAME?
	56		3.69238e-05	8.67274e-06	0.000148427	3.56516e-05	1.07257	29047	#NAME?	#NAME?	#NAME?	#NAME?	#NAME?	#NAME?	#NAME?	#NAME?	#NAME?	#NAME?	#NAME?	#NAME?	#NAME?	#NAME?	#NAME?	#NAME?	#NAME?	#NAME?	#NAME?	#NAME?	#NAME?	#NAME?	#NAME?	#NAME?	#NAME?
	57		3.10891e-05	7.10774e-06	0.000128264	3.09073e-05	1.01174	32542.1	#NAME?	#NAME?	#NAME?	#NAME?	#NAME?	#NAME?	#NAME?	#NAME?	#NAME?	#NAME?	#NAME?	#NAME?	#NAME?	#NAME?	#NAME?	#NAME?	#NAME?	#NAME?	#NAME?	#NAME?	#NAME?	#NAME?	#NAME?	#NAME?	#NAME?
	58		2.61764e-05	5.82515e-06	0.000110841	2.67897e-05	0.954687	36470.4	#NAME?	#NAME?	#NAME?	#NAME?	#NAME?	#NAME?	#NAME?	#NAME?	#NAME?	#NAME?	#NAME?	#NAME?	#NAME?	#NAME?	#NAME?	#NAME?	#NAME?	#NAME?	#NAME?	#NAME?	#NAME?	#NAME?	#NAME?	#NAME?	#NAME?
	59		2.204e-05	4.774e-06	9.57838e-05	2.32168e-05	0.90115	40886.2	#NAME?	#NAME?	#NAME?	#NAME?	#NAME?	#NAME?	#NAME?	#NAME?	#NAME?	#NAME?	#NAME?	#NAME?	#NAME?	#NAME?	#NAME?	#NAME?	#NAME?	#NAME?	#NAME?	#NAME?	#NAME?	#NAME?	#NAME?	#NAME?	#NAME?
	60		1.85572e-05	3.91253e-06	8.27723e-05	2.01173e-05	0.850879	45850.9	#NAME?	#NAME?	#NAME?	#NAME?	#NAME?	#NAME?	#NAME?	#NAME?	#NAME?	#NAME?	#NAME?	#NAME?	#NAME?	#NAME?	#NAME?	#NAME?	#NAME?	#NAME?	#NAME?	#NAME?	#NAME?	#NAME?	#NAME?	#NAME?	#NAME?
	61		1.56248e-05	3.20652e-06	7.15283e-05	1.7429e-05	0.803647	51433.3	#NAME?	#NAME?	#NAME?	#NAME?	#NAME?	#NAME?	#NAME?	#NAME?	#NAME?	#NAME?	#NAME?	#NAME?	#NAME?	#NAME?	#NAME?	#NAME?	#NAME?	#NAME?	#NAME?	#NAME?	#NAME?	#NAME?	#NAME?	#NAME?	#NAME?
	62		1.31557e-05	2.6279e-06	6.18118e-05	1.50979e-05	0.759245	57711.4	#NAME?	#NAME?	#NAME?	#NAME?	#NAME?	#NAME?	#NAME?	#NAME?	#NAME?	#NAME?	#NAME?	#NAME?	#NAME?	#NAME?	#NAME?	#NAME?	#NAME?	#NAME?	#NAME?	#NAME?	#NAME?	#NAME?	#NAME?	#NAME?	#NAME?
	63		1.10768e-05	2.15369e-06	5.34151e-05	1.30769e-05	0.717483	64772.5	#NAME?	#NAME?	#NAME?	#NAME?	#NAME?	#NAME?	#NAME?	#NAME?	#NAME?	#NAME?	#NAME?	#NAME?	#NAME?	#NAME?	#NAME?	#NAME?	#NAME?	#NAME?	#NAME?	#NAME?	#NAME?	#NAME?	#NAME?	#NAME?	#NAME?
	64		9.32648e-06	1.76506e-06	4.61591e-05	1.1325e-05	0.678185	72715.5	#NAME?	#NAME?	#NAME?	#NAME?	#NAME?	#NAME?	#NAME?	#NAME?	#NAME?	#NAME?	#NAME?	#NAME?	#NAME?	#NAME?	#NAME?	#NAME?	#NAME?	#NAME?	#NAME?	#NAME?	#NAME?	#NAME?	#NAME?	#NAME?	#NAME?
	65		7.8527e-06	1.44655e-06	3.98887e-05	9.80668e-06	0.641188	81651.3	#NAME?	#NAME?	#NAME?	#NAME?	#NAME?	#NAME?	#NAME?	#NAME?	#NAME?	#NAME?	#NAME?	#NAME?	#NAME?	#NAME?	#NAME?	#NAME?	#NAME?	#NAME?	#NAME?	#NAME?	#NAME?	#NAME?	#NAME?	#NAME?	#NAME?
	66		6.61181e-06	1.18552e-06	3.44701e-05	8.49098e-06	0.606342	91705.3	#NAME?	#NAME?	#NAME?	#NAME?	#NAME?	#NAME?	#NAME?	#NAME?	#NAME?	#NAME?	#NAME?	#NAME?	#NAME?	#NAME?	#NAME?	#NAME?	#NAME?	#NAME?	#NAME?	#NAME?	#NAME?	#NAME?	#NAME?	#NAME?	#NAME?
	67		5.56701e-06	9.71596e-07	2.97876e-05	7.35103e-06	0.573509	103019	#NAME?	#NAME?	#NAME?	#NAME?	#NAME?	#NAME?	#NAME?	#NAME?	#NAME?	#NAME?	#NAME?	#NAME?	#NAME?	#NAME?	#NAME?	#NAME?	#NAME?	#NAME?	#NAME?	#NAME?	#NAME?	#NAME?	#NAME?	#NAME?	#NAME?
	68		4.6873e-06	7.96271e-07	2.57412e-05	6.36351e-06	0.542559	115750	#NAME?	#NAME?	#NAME?	#NAME?	#NAME?	#NAME?	#NAME?	#NAME?	#NAME?	#NAME?	#NAME?	#NAME?	#NAME?	#NAME?	#NAME?	#NAME?	#NAME?	#NAME?	#NAME?	#NAME?	#NAME?	#NAME?	#NAME?	#NAME?	#NAME?
	69		3.94661e-06	6.52584e-07	2.22445e-05	5.50814e-06	0.513375	130079	#NAME?	#NAME?	#NAME?	#NAME?	#NAME?	#NAME?	#NAME?	#NAME?	#NAME?	#NAME?	#NAME?	#NAME?	#NAME?	#NAME?	#NAME?	#NAME?	#NAME?	#NAME?	#NAME?	#NAME?	#NAME?	#NAME?	#NAME?	#NAME?	#NAME?
	70		3.32296e-06	5.34825e-07	1.92227e-05	4.76732e-06	0.485845	146208	#NAME?	#NAME?	#NAME?	#NAME?	#NAME?	#NAME?	#NAME?	#NAME?	#NAME?	#NAME?	#NAME?	#NAME?	#NAME?	#NAME?	#NAME?	#NAME?	#NAME?	#NAME?	#NAME?	#NAME?	#NAME?	#NAME?	#NAME?	#NAME?	#NAME?
	71		2.79787e-06	4.38316e-07	1.66115e-05	4.12581e-06	0.459867	164363	#NAME?	#NAME?	#NAME?	#NAME?	#NAME?	#NAME?	#NAME?	#NAME?	#NAME?	#NAME?	#NAME?	#NAME?	#NAME?	#NAME?	#NAME?	#NAME?	#NAME?	#NAME?	#NAME?	#NAME?	#NAME?	#NAME?	#NAME?	#NAME?	#NAME?
	72		2.35575e-06	3.59222e-07	1.43549e-05	3.57033e-06	0.435347	184802	#NAME?	#NAME?	#NAME?	#NAME?	#NAME?	#NAME?	#NAME?	#NAME?	#NAME?	#NAME?	#NAME?	#NAME?	#NAME?	#NAME?	#NAME?	#NAME?	#NAME?	#NAME?	#NAME?	#NAME?	#NAME?	#NAME?	#NAME?	#NAME?	#NAME?
	73		1.98349e-06	2.944e-07	1.24049e-05	3.08942e-06	0.412195	207813	#NAME?	#NAME?	#NAME?	#NAME?	#NAME?	#NAME?	#NAME?	#NAME?	#NAME?	#NAME?	#NAME?	#NAME?	#NAME?	#NAME?	#NAME?	#NAME?	#NAME?	#NAME?	#NAME?	#NAME?	#NAME?	#NAME?	#NAME?	#NAME?	#NAME?
	74		1.67006e-06	2.41276e-07	1.07198e-05	2.6731e-06	0.390329	233721	#NAME?	#NAME?	#NAME?	#NAME?	#NAME?	#NAME?	#NAME?	#NAME?	#NAME?	#NAME?	#NAME?	#NAME?	#NAME?	#NAME?	#NAME?	#NAME?	#NAME?	#NAME?	#NAME?	#NAME?	#NAME?	#NAME?	#NAME?	#NAME?	#NAME?
	75		1.40615e-06	1.97737e-07	9.26361e-06	2.31272e-06	0.369671	262895	#NAME?	#NAME?	#NAME?	#NAME?	#NAME?	#NAME?	#NAME?	#NAME?	#NAME?	#NAME?	#NAME?	#NAME?	#NAME?	#NAME?	#NAME?	#NAME?	#NAME?	#NAME?	#NAME?	#NAME?	#NAME?	#NAME?	#NAME?	#NAME?	#NAME?
	76		1.18395e-06	1.62056e-07	8.00522e-06	2.00081e-06	0.350151	295747	#NAME?	#NAME?	#NAME?	#NAME?	#NAME?	#NAME?	#NAME?	#NAME?	#NAME?	#NAME?	#NAME?	#NAME?	#NAME?	#NAME?	#NAME?	#NAME?	#NAME?	#NAME?	#NAME?	#NAME?	#NAME?	#NAME?	#NAME?	#NAME?	#NAME?
	77		9.96862e-07	1.32813e-07	6.91777e-06	1.73086e-06	0.331701	332744	#NAME?	#NAME?	#NAME?	#NAME?	#NAME?	#NAME?	#NAME?	#NAME?	#NAME?	#NAME?	#NAME?	#NAME?	#NAME?	#NAME?	#NAME?	#NAME?	#NAME?	#NAME?	#NAME?	#NAME?	#NAME?	#NAME?	#NAME?	#NAME?	#NAME?
	78		8.39337e-07	1.08847e-07	5.97805e-06	1.49724e-06	0.314258	374411	#NAME?	#NAME?	#NAME?	#NAME?	#NAME?	#NAME?	#NAME?	#NAME?	#NAME?	#NAME?	#NAME?	#NAME?	#NAME?	#NAME?	#NAME?	#NAME?	#NAME?	#NAME?	#NAME?	#NAME?	#NAME?	#NAME?	#NAME?	#NAME?	#NAME?
	79		7.06704e-07	8.92053e-08	5.16597e-06	1.29509e-06	0.297764	421341	#NAME?	#NAME?	#NAME?	#NAME?	#NAME?	#NAME?	#NAME?	#NAME?	#NAME?	#NAME?	#NAME?	#NAME?	#NAME?	#NAME?	#NAME?	#NAME?	#NAME?	#NAME?	#NAME?	#NAME?	#NAME?	#NAME?	#NAME?	#NAME?	#NAME?
	80		5.9503e-07	7.31082e-08	4.46422e-06	1.12018e-06	0.282164	474200	#NAME?	#NAME?	#NAME?	#NAME?	#NAME?	#NAME?	#NAME?	#NAME?	#NAME?	#NAME?	#NAME?	#NAME?	#NAME?	#NAME?	#NAME?	#NAME?	#NAME?	#NAME?	#NAME?	#NAME?	#NAME?	#NAME?	#NAME?	#NAME?	#NAME?
	81		5.01003e-07	5.99158e-08	3.85779e-06	9.68845e-07	0.267406	533741	#NAME?	#NAME?	#NAME?	#NAME?	#NAME?	#NAME?	#NAME?	#NAME?	#NAME?	#NAME?	#NAME?	#NAME?	#NAME?	#NAME?	#NAME?	#NAME?	#NAME?	#NAME?	#NAME?	#NAME?	#NAME?	#NAME?	#NAME?	#NAME?	#NAME?
	82		4.21834e-07	4.9104e-08	3.33374e-06	8.37916e-07	0.253444	600813	#NAME?	#NAME?	#NAME?	#NAME?	#NAME?	#NAME?	#NAME?	#NAME?	#NAME?	#NAME?	#NAME?	#NAME?	#NAME?	#NAME?	#NAME?	#NAME?	#NAME?	#NAME?	#NAME?	#NAME?	#NAME?	#NAME?	#NAME?	#NAME?	#NAME?
	83		3.55176e-07	4.02432e-08	2.88087e-06	7.24651e-07	0.240231	676371	#NAME?	#NAME?	#NAME?	#NAME?	#NAME?	#NAME?	#NAME?	#NAME?	#NAME?	#NAME?	#NAME?	#NAME?	#NAME?	#NAME?	#NAME?	#NAME?	#NAME?	#NAME?	#NAME?	#NAME?	#NAME?	#NAME?	#NAME?	#NAME?	#NAME?
	84		2.99051e-07	3.29813e-08	2.48953e-06	6.2667e-07	0.227725	761492	#NAME?	#NAME?	#NAME?	#NAME?	#NAME?	#NAME?	#NAME?	#NAME?	#NAME?	#NAME?	#NAME?	#NAME?	#NAME?	#NAME?	#NAME?	#NAME?	#NAME?	#NAME?	#NAME?	#NAME?	#NAME?	#NAME?	#NAME?	#NAME?	#NAME?
	85		2.51794e-07	2.70298e-08	2.15135e-06	5.41917e-07	0.215886	857391	#NAME?	#NAME?	#NAME?	#NAME?	#NAME?	#NAME?	#NAME?	#NAME?	#NAME?	#NAME?	#NAME?	#NAME?	#NAME?	#NAME?	#NAME?	#NAME?	#NAME?	#NAME?	#NAME?	#NAME?	#NAME?	#NAME?	#NAME?	#NAME?	#NAME?
	86		2.12006e-07	2.21523e-08	1.8591e-06	4.6861e-07	0.204678	965437	#NAME?	#NAME?	#NAME?	#NAME?	#NAME?	#NAME?	#NAME?	#NAME?	#NAME?	#NAME?	#NAME?	#NAME?	#NAME?	#NAME?	#NAME?	#NAME?	#NAME?	#NAME?	#NAME?	#NAME?	#NAME?	#NAME?	#NAME?	#NAME?	#NAME?
	87		1.78504e-07	1.81549e-08	1.60656e-06	4.05205e-07	0.194065	1.08717e+06	#NAME?	#NAME?	#NAME?	#NAME?	#NAME?	#NAME?	#NAME?	#NAME?	#NAME?	#NAME?	#NAME?	#NAME?	#NAME?	#NAME?	#NAME?	#NAME?	#NAME?	#NAME?	#NAME?	#NAME?	#NAME?	#NAME?	#NAME?	#NAME?	#NAME?
	88		1.50297e-07	1.48788e-08	1.38832e-06	3.50367e-07	0.184015	1.22434e+06	#NAME?	#NAME?	#NAME?	#NAME?	#NAME?	#NAME?	#NAME?	#NAME?	#NAME?	#NAME?	#NAME?	#NAME?	#NAME?	#NAME?	#NAME?	#NAME?	#NAME?	#NAME?	#NAME?	#NAME?	#NAME?	#NAME?	#NAME?	#NAME?	#NAME?
	89		1.26547e-07	1.2194e-08	1.19973e-06	3.02942e-07	0.174495	1.3789e+06	#NAME?	#NAME?	#NAME?	#NAME?	#NAME?	#NAME?	#NAME?	#NAME?	#NAME?	#NAME?	#NAME?	#NAME?	#NAME?	#NAME?	#NAME?	#NAME?	#NAME?	#NAME?	#NAME?	#NAME?	#NAME?	#NAME?	#NAME?	#NAME?	#NAME?
	90		1.0655e-07	9.99355e-09	1.03675e-06	2.61928e-07	0.165478	1.55306e+06	#NAME?	#NAME?	#NAME?	#NAME?	#NAME?	#NAME?	#NAME?	#NAME?	#NAME?	#NAME?	#NAME?	#NAME?	#NAME?	#NAME?	#NAME?	#NAME?	#NAME?	#NAME?	#NAME?	#NAME?	#NAME?	#NAME?	#NAME?	#NAME?	#NAME?
	91		8.97127e-08	8.19021e-09	8.95918e-07	2.26461e-07	0.156935	1.74931e+06	#NAME?	#NAME?	#NAME?	#NAME?	#NAME?	#NAME?	#NAME?	#NAME?	#NAME?	#NAME?	#NAME?	#NAME?	#NAME?	#NAME?	#NAME?	#NAME?	#NAME?	#NAME?	#NAME?	#NAME?	#NAME?	#NAME?	#NAME?	#NAME?	#NAME?
	92		7.55362e-08	6.71229e-09	7.74215e-07	1.95791e-07	0.148841	1.97046e+06	#NAME?	#NAME?	#NAME?	#NAME?	#NAME?	#NAME?	#NAME?	#NAME?	#NAME?	#NAME?	#NAME?	#NAME?	#NAME?	#NAME?	#NAME?	#NAME?	#NAME?	#NAME?	#NAME?	#NAME?	#NAME?	#NAME?	#NAME?	#NAME?	#NAME?
	93		6.35999e-08	5.50106e-09	6.69043e-07	1.69271e-07	0.141172	2.21968e+06	#NAME?	#NAME?	#NAME?	#NAME?	#NAME?	#NAME?	#NAME?	#NAME?	#NAME?	#NAME?	#NAME?	#NAME?	#NAME?	#NAME?	#NAME?	#NAME?	#NAME?	#NAME?	#NAME?	#NAME?	#NAME?	#NAME?	#NAME?	#NAME?	#NAME?
	94		5.35498e-08	4.50839e-09	5.78159e-07	1.46339e-07	0.133904	2.50055e+06	#NAME?	#NAME?	#NAME?	#NAME?	#NAME?	#NAME?	#NAME?	#NAME?	#NAME?	#NAME?	#NAME?	#NAME?	#NAME?	#NAME?	#NAME?	#NAME?	#NAME?	#NAME?	#NAME?	#NAME?	#NAME?	#NAME?	#NAME?	#NAME?	#NAME?
	95		4.50878e-08	3.69485e-09	4.99621e-07	1.26512e-07	0.127016	2.81707e+06	#NAME?	#NAME?	#NAME?	#NAME?	#NAME?	#NAME?	#NAME?	#NAME?	#NAME?	#NAME?	#NAME?	#NAME?	#NAME?	#NAME?	#NAME?	#NAME?	#NAME?	#NAME?	#NAME?	#NAME?	#NAME?	#NAME?	#NAME?	#NAME?	#NAME?
	96		3.7963e-08	3.02811e-09	4.31751e-07	1.09368e-07	0.120487	3.1738e+06	#NAME?	#NAME?	#NAME?	#NAME?	#NAME?	#NAME?	#NAME?	#NAME?	#NAME?	#NAME?	#NAME?	#NAME?	#NAME?	#NAME?	#NAME?	#NAME?	#NAME?	#NAME?	#NAME?	#NAME?	#NAME?	#NAME?	#NAME?	#NAME?	#NAME?
	97		3.19641e-08	2.48169e-09	3.73101e-07	9.45457e-08	0.114298	3.57584e+06	#NAME?	#NAME?	#NAME?	#NAME?	#NAME?	#NAME?	#NAME?	#NAME?	#NAME?	#NAME?	#NAME?	#NAME?	#NAME?	#NAME?	#NAME?	#NAME?	#NAME?	#NAME?	#NAME?	#NAME?	#NAME?	#NAME?	#NAME?	#NAME?	#NAME?
	98		2.69131e-08	2.03387e-09	3.22418e-07	8.17307e-08	0.108432	4.02896e+06	#NAME?	#NAME?	#NAME?	#NAME?	#NAME?	#NAME?	#NAME?	#NAME?	#NAME?	#NAME?	#NAME?	#NAME?	#NAME?	#NAME?	#NAME?	#NAME?	#NAME?	#NAME?	#NAME?	#NAME?	#NAME?	#NAME?	#NAME?	#NAME?	#NAME?
	99		2.26603e-08	1.66686e-09	2.7862e-07	7.06513e-08	0.10287	4.53967e+06	#NAME?	#NAME?	#NAME?	#NAME?	#NAME?	#NAME?	#NAME?	#NAME?	#NAME?	#NAME?	#NAME?	#NAME?	#NAME?	#NAME?	#NAME?	#NAME?	#NAME?	#NAME?	#NAME?	#NAME?	#NAME?	#NAME?	#NAME?	#NAME?	#NAME?
	100		1.90795e-08	1.36607e-09	2.40772e-07	6.10729e-08	0.0975969	5.11528e+06	#NAME?	#NAME?	#NAME?	#NAME?	#NAME?	#NAME?	#NAME?	#NAME?	#NAME?	#NAME?	#NAME?	#NAME?	#NAME?	#NAME?	#NAME?	#NAME?	#NAME?	#NAME?	#NAME?	#NAME?	#NAME?	#NAME?	#NAME?	#NAME?	#NAME?
	101		1.60645e-08	1.11956e-09	2.08065e-07	5.27921e-08	0.092597	5.76407e+06	#NAME?	#NAME?	#NAME?	#NAME?	#NAME?	#NAME?	#NAME?	#NAME?	#NAME?	#NAME?	#NAME?	#NAME?	#NAME?	#NAME?	#NAME?	#NAME?	#NAME?	#NAME?	#NAME?	#NAME?	#NAME?	#NAME?	#NAME?	#NAME?	#NAME?
	102		1.3526e-08	9.17539e-10	1.79801e-07	4.56335e-08	0.0878559	6.49534e+06	#NAME?	#NAME?	#NAME?	#NAME?	#NAME?	#NAME?	#NAME?	#NAME?	#NAME?	#NAME?	#NAME?	#NAME?	#NAME?	#NAME?	#NAME?	#NAME?	#NAME?	#NAME?	#NAME?	#NAME?	#NAME?	#NAME?	#NAME?	#NAME?	#NAME?
	103		1.13886e-08	7.51969e-10	1.55376e-07	3.94449e-08	0.08336	7.3196e+06	#NAME?	#NAME?	#NAME?	#NAME?	#NAME?	#NAME?	#NAME?	#NAME?	#NAME?	#NAME?	#NAME?	#NAME?	#NAME?	#NAME?	#NAME?	#NAME?	#NAME?	#NAME?	#NAME?	#NAME?	#NAME?	#NAME?	#NAME?	#NAME?	#NAME?
	104		9.58896e-09	6.16276e-10	1.3427e-07	3.40952e-08	0.0790963	8.24869e+06	#NAME?	#NAME?			0	#NAME?			0	#NAME?			0	#NAME?			0	#NAME?			0	#NAME?			0
	YLD										#NAME?	#NAME?	#NAME?		#NAME?	#NAME?	#NAME?		#NAME?	#NAME?	#NAME?		#NAME?	#NAME?	#NAME?		#NAME?	#NAME?	#NAME?		#NAME?	#NAME?	#NAME?
PICS
			SCENARIO IA												SCENARIO IB												SCENARIO IC
			Scenario IA_V (Vaccinated)						Scenario IA_U (Unvaccinated)						Scenario IB (Vaccinated)						Scenario IB_U (Unvaccinated)						Scenario IC (Vaccinated)						Scenario IC_U (Unvaccinated)
			COVID INCIDENCE	PICS INCIDENCE	LE tables (Yrs)	Duration (days)	Incidence-per year	DALYS	COVID INCIDENCE	PICS INCIDENCE	LE tables (Yrs)	Duration (days)	Incidence-per year	DALYS	COVID INCIDENCE	PICS INCIDENCE	LE tables (Yrs)	Duration (days)	Incidence-per year	DALYS	COVID INCIDENCE	PICS INCIDENCE	LE tables (Yrs)	Duration (days)	Incidence-per year	DALYS	COVID INCIDENCE	PICS INCIDENCE	LE tables (Yrs)	Duration (days)	Incidence-per year	DALYS	COVID INCIDENCE	PICS INCIDENCE	LE tables (Yrs)	Duration (days)	Incidence-per year	DALYS
	60-69		282.313	255.776	21.403	7803.43	5464.55	#NAME?	310.739	281.529	21.403	7803.43	6014.77	#NAME?	4.61613	4.18222	21.403	7803.43	89.3515	#NAME?	5.10204	4.62245	21.403	7803.43	98.7569	#NAME?	1.94364	1.76093	21.403	7803.43	37.6217	#NAME?	2.18659	1.98105	21.403	7803.43	42.3244	#NAME?
	70-79		129.252	117.102	13.4485	4898.07	1570.36	#NAME?	142.266	128.893	13.4485	4898.07	1728.48	#NAME?	2.11341	1.91475	13.4485	4898.07	25.6771	#NAME?	2.33587	2.1163	13.4485	4898.07	28.38	#NAME?	0.889857	0.80621	13.4485	4898.07	10.8114	#NAME?	1.00109	0.906987	13.4485	4898.07	12.1628	#NAME?
	80-89		30.6123	27.7347	7.10454	2580.93	195.979	#NAME?	33.6946	30.5273	7.10454	2580.93	215.712	#NAME?	0.500545	0.453493	7.10454	2580.93	3.20448	#NAME?	0.553233	0.50123	7.10454	2580.93	3.54179	#NAME?	0.210756	0.190945	7.10454	2580.93	1.34925	#NAME?	0.2371	0.214813	7.10454	2580.93	1.51791	#NAME?
	90+		0	0	3.45069	1246.36	0	#NAME?	0	0	3.45069	1246.36	0	#NAME?	0	0	3.45069	1246.36	0	#NAME?	0	0	3.45069	1246.36	0	#NAME?	0	0	3.45069	1246.36	0	#NAME?	0	0	3.45069	1246.36	0	#NAME?
	TOTAL		442.177	400.612			7230.89	#NAME?	486.699	440.949			7958.96	#NAME?	7.23009	6.55046			118.233	#NAME?	7.99115	7.23998			130.679	#NAME?	3.04425	2.75809			49.7824	#NAME?	3.42478	3.10285			56.0052	#NAME?
Permanent
					SCENARIO IA				SCENARIO IB				SCENARIO IC
					Scenario IA (Vaccinated)		Scenario IA (UNVaccinated)		Scenario IB (Vaccinated)		Scenario IB (UNVaccinated)		Scenario IC (Vaccinated)		Scenario IC (UNVaccinated)
			IHME 2019		COVID-19 consequences		COVID-19 consequences		COVID-19 consequences		COVID-19 consequences		COVID-19 consequences		COVID-19 consequences
					Base		Base		Base		Base		Base		Base
			Incidence Base	DALYS Base	Incidence	DALYS	Incidence	DALYS	Incidence	DALYS	Incidence	DALYS	Incidence	DALYS	Incidence	DALYS
1	Diabetes	587	69042.8	186528	#NAME?	#NAME?	#NAME?	#NAME?	#NAME?	#NAME?	#NAME?	#NAME?	#NAME?	#NAME?	#NAME?	#NAME?
2	Parkinsons	544	6598.01	38742.5	#NAME?	#NAME?	#NAME?	#NAME?	#NAME?	#NAME?	#NAME?	#NAME?	#NAME?	#NAME?	#NAME?	#NAME?
3	Dementia	543	43968.6	154293	#NAME?	#NAME?	#NAME?	#NAME?	#NAME?	#NAME?	#NAME?	#NAME?	#NAME?	#NAME?	#NAME?	#NAME?
4	Anxiety disorders	571	188750	139108	#NAME?	#NAME?	#NAME?	#NAME?	#NAME?	#NAME?	#NAME?	#NAME?	#NAME?	#NAME?	#NAME?	#NAME?
5	Ischemic Stroke	495	17984.1	114238	#NAME?	#NAME?	#NAME?	#NAME?	#NAME?	#NAME?	#NAME?	#NAME?	#NAME?	#NAME?	#NAME?	#NAME?
	Total with Diabetes					#NAME?		#NAME?		#NAME?		#NAME?		#NAME?		#NAME?
	Total without Diabetes					#NAME?		#NAME?		#NAME?		#NAME?		#NAME?		#NAME?
DALYS
			Scenario IA_V (Vaccinated)							Scenario IA_U (Unvaccinated)							Scenario IB_V (Vaccinated)							Scenario IB_U (Unvaccinated)							Scenario IC_V (Vaccinated)							Scenario IC_U (Unvaccinated)
			TOTAL DALYS				ERRUNOUTPUT			TOTAL DALYS				ERRUNOUTPUT			TOTAL DALYS				ERRUNOUTPUT			TOTAL DALYS				ERRUNOUTPUT			TOTAL DALYS				ERRUNOUTPUT			TOTAL DALYS				ERRUNOUTPUT
			YLL	YLD (Base)	DALYS	DALYS per 100,000 population				YLL	YLD (Base)	DALYS	DALYS per 100,000 population				YLL	YLD (Base)	DALYS	DALYS per 100,000 population				YLL	YLD (Base)	DALYS	DALYS per 100,000 population				YLL	YLD (Base)	DALYS	DALYS per 100,000 population				YLL	YLD (Base)	DALYS	DALYS per 100,000 population
	YLL_1AV_N		19326.6				#NAME?		YLL_1AU_N	40135.8				#NAME?		YLL_1BV_N	344.558				#NAME?		YLL_1BU_N	762.205				#NAME?		YLL_1CV_N	135.735				#NAME?		YLL_1CU_N	302.794				#NAME?
	YLD_Acute_1AV_N			#NAME?			#NAME?		YLD_Acute_1AU_N		#NAME?			#NAME?		YLD_Acute_1BV_N		#NAME?			#NAME?		YLD_Acute_1BU_N		#NAME?			#NAME?		YLD_Acute_1CV_N		#NAME?			#NAME?		YLD_Acute_1CU_N		#NAME?			#NAME?
	YLD_Chronic_1AV_N			#NAME?			#NAME?		YLD_Chronic_1AU_N		#NAME?			#NAME?		YLD_Chronic_1BV_N		#NAME?			#NAME?		YLD_Chronic_1BU_N		#NAME?			#NAME?		YLD_Chronic_1CV_N		#NAME?			#NAME?		YLD_Chronic_1CU_N		#NAME?			#NAME?
	YLD_PICS_1AV_N			#NAME?			#NAME?		YLD_PICS_1AU_N		#NAME?			#NAME?		YLD_PICS_1BV_N		#NAME?			#NAME?		YLD_PICS_1BU_N		#NAME?			#NAME?		YLD_PICS_1CV_N		#NAME?			#NAME?		YLD_PICS_1CU_N_N		#NAME?			#NAME?
	DALY_Perm_Diab_1AV_N			#NAME?			#NAME?		DALY_Perm_Diab_1AU_N		#NAME?			#NAME?		DALY_Perm_Diab_1BV_N		#NAME?			#NAME?		DALY_Perm_Diab_1BU_N		#NAME?			#NAME?		DALY_Perm_Diab_1CV_N		#NAME?			#NAME?		DALY_Perm_Diab_1CU_N		#NAME?			#NAME?
	DALY_Perm_WoDiab_1AV_N			#NAME?			#NAME?		DALY_Perm_WoDiab_1AU_N		#NAME?			#NAME?		DALY_Perm_WoDiab_1BV_N		#NAME?			#NAME?		DALY_Perm_WoDiab_1BU_N		#NAME?			#NAME?		DALY_Perm_WoDiab_1CV_N		#NAME?			#NAME?		DALY_Perm_WoDiab_1CU_N		#NAME?			#NAME?
	TOTAL YLD Baseline_1AV_N			#NAME?		#NAME?	#NAME?		TOTAL YLD Baseline_1AU_N		#NAME?		#NAME?	#NAME?		TOTAL YLD Baseline_1BV_N		#NAME?		#NAME?	#NAME?		TOTAL YLD Baseline_1BU_N		#NAME?		#NAME?	#NAME?		TOTAL YLD Baseline_1CV_N		#NAME?		#NAME?	#NAME?		TOTAL YLD Baseline_1CU_N		#NAME?		#NAME?	#NAME?
	TOTAL YLD with Diabetes_1AV_N			#NAME?		#NAME?	#NAME?		TOTAL YLD with Diabetes_1AU_N		#NAME?		#NAME?	#NAME?		TOTAL YLD with Diabetes_1BV_N		#NAME?		#NAME?	#NAME?		TOTAL YLD with Diabetes_1BU_N		#NAME?		#NAME?	#NAME?		TOTAL YLD with Diabetes_1CV_N		#NAME?		#NAME?	#NAME?		TOTAL YLD with Diabetes_1CU_N		#NAME?		#NAME?	#NAME?
	TOTAL YLD without Diabetes_1AV_N			#NAME?		#NAME?	#NAME?		TOTAL YLD without Diabetes_1AU_N		#NAME?		#NAME?	#NAME?		TOTAL YLD without Diabetes_1BV_N		#NAME?		#NAME?	#NAME?		TOTAL YLD without Diabetes_1BU_N		#NAME?		#NAME?	#NAME?		TOTAL YLD without Diabetes_1CV_N		#NAME?		#NAME?	#NAME?		TOTAL YLD without Diabetes_1CU_N		#NAME?		#NAME?	#NAME?
	TOTAL DALYS Baseline_1AV_N				#NAME?	#NAME?	#NAME?		TOTAL DALYS Baseline_1AU_N			#NAME?	#NAME?	#NAME?		TOTAL DALYS Baseline_1BV_N			#NAME?	#NAME?	#NAME?		TOTAL DALYS Baseline_1BU_N			#NAME?	#NAME?	#NAME?		TOTAL DALYS Baseline_1CV_N			#NAME?	#NAME?	#NAME?		TOTAL DALYS Baseline_1CU_N			#NAME?	#NAME?	#NAME?
	Total DALY_D_1AV_N				#NAME?	#NAME?	#NAME?		Total DALY_D_1AU_N			#NAME?	#NAME?	#NAME?		Total DALY_D_1BV_N			#NAME?	#NAME?	#NAME?		Total DALY_D_1BU_N			#NAME?	#NAME?	#NAME?		Total DALY_D_1CV_N			#NAME?	#NAME?	#NAME?		Total DALY_D_1CU_N			#NAME?	#NAME?	#NAME?
	Total DALYS_WoD_1AV_N				#NAME?	#NAME?	#NAME?		Total DALYS_WoD_1AU_N			#NAME?	#NAME?	#NAME?		Total DALYS_WoD_1BV_N			#NAME?	#NAME?	#NAME?		Total DALYS_WoD_1BU_N			#NAME?	#NAME?	#NAME?		Total DALYS_WoD_1CV_N			#NAME?	#NAME?	#NAME?		Total DALYS_WoD_1CU_N			#NAME?	#NAME?	#NAME?
			Scenario IA_Combined													Scenario IB_Combined														Scenario IC_Combined
			TOTAL DALYS				ERRUNOUTPUT										TOTAL DALYS				ERRUNOUTPUT										TOTAL DALYS				ERRUNOUTPUT
			YLL	YLD (Base)	DALYS	DALYS per 100,000 population											YLL	YLD (Base)	DALYS	DALYS per 100,000 population											YLL	YLD (Base)	DALYS	DALYS per 100,000 population
	YLL_1A_Combined_NSW		#NAME?				#NAME?									YLL_1B_Combined_NSW	#NAME?				#NAME?									YLL_1C_Combined_NSW	#NAME?				#NAME?
	YLD_Acute_1A_Combined_NSW			#NAME?			#NAME?									YLD_Acute_1B_Combined_NSW		#NAME?			#NAME?									YLD_Acute_1C_Combined_NSW		#NAME?			#NAME?
	YLD_Chronic_1A_Combined_NSW			#NAME?			#NAME?									YLD_Chronic_1B_Combined_NSW		#NAME?			#NAME?									YLD_Chronic_1C_Combined_NSW		#NAME?			#NAME?
	YLD_PICS_1A_Combined_NSW			#NAME?			#NAME?									YLD_PICS_1B_Combined_NSW		#NAME?			#NAME?									YLD_PICS_1C_Combined_NSW		#NAME?			#NAME?
	DALY_Perm_Diab_1A_Combined_NSW			#NAME?			#NAME?									DALY_Perm_Diab_1B_Combined_NSW		#NAME?			#NAME?									DALY_Perm_Diab_1C_Combined_NSW		#NAME?			#NAME?
	DALY_Perm_WoDiab_1A_Combined_NSW			#NAME?			#NAME?									DALY_Perm_WoDiab_1B_Combined_NSW		#NAME?			#NAME?									DALY_Perm_WoDiab_1C_Combined_NSW		#NAME?			#NAME?
	TOTAL YLD Baseline_1A_Combined_NSW			#NAME?		#NAME?	#NAME?									TOTAL YLD Baseline_1B_Combined_NSW		#NAME?		#NAME?	#NAME?									TOTAL YLD Baseline_1C_Combined_NSW		#NAME?		#NAME?	#NAME?
	TOTAL YLD with Diabetes_1A_Combined_NSW			#NAME?		#NAME?	#NAME?									TOTAL YLD with Diabetes_1B_Combined_NSW		#NAME?		#NAME?	#NAME?									TOTAL YLD with Diabetes_1C_Combined_NSW		#NAME?		#NAME?	#NAME?
	TOTAL YLD without Diabetes_1A_Combined_NSW			#NAME?		#NAME?	#NAME?									TOTAL YLD without Diabetes_1B_Combined_NSW		#NAME?		#NAME?	#NAME?									TOTAL YLD without Diabetes_1C_Combined_NSW		#NAME?		#NAME?	#NAME?
	TOTAL DALYS Baseline_1A_Combined_NSW				#NAME?	#NAME?	#NAME?									TOTAL DALYS Baseline_1B_Combined_NSW			#NAME?	#NAME?	#NAME?									TOTAL DALYS Baseline_1C_Combined_NSW			#NAME?	#NAME?	#NAME?
	Total DALY_D_1A_Combined_NSW				#NAME?	#NAME?	#NAME?									Total DALY_D_1B_Combined_NSW			#NAME?	#NAME?	#NAME?									Total DALY_D_1C_Combined_NSW			#NAME?	#NAME?	#NAME?
	Total DALYS_WoD_1A_Combined_NSW				#NAME?	#NAME?	#NAME?									Total DALYS_WoD_1B_Combined_NSW			#NAME?	#NAME?	#NAME?									Total DALYS_WoD_1C_Combined_NSW			#NAME?	#NAME?	#NAME?

## Sheet: Scenario 2 NSW
DALYS Calculation: Scenario 2 (70% and high seeding infections assuming different combinations of PHSMs and TTIQ effectiveness)
Back to "read me"
Mortality (YLL)
				DEATH								YLL
	Age	Mid	LETotals	Scenario 2A_V (Vaccinated)	Scenario 2A_U (Unvaccinated)	Scenario 2B_V (Vaccinated)	Scenario 2B_U (Unvaccinated)	Scenario 2C_V (Vaccinated)	Scenario 2C_U (Unvaccinated)	Scenario 2D_V (Vaccinated)	Scenario 2D_U (Unvaccinated)	Scenario 2A_V (Vaccinated)	Scenario 2A_U (Unvaccinated)	Scenario 2B_V (Vaccinated)	Scenario 2B_U (Unvaccinated)	Scenario 2C_V (Vaccinated)	Scenario 2C_U (Unvaccinated)	Scenario 2D_V (Vaccinated)	Scenario 2D_U (Unvaccinated)
	0-9	5	78.2138	0	0	0	0	0	0	0	0	0	0	0	0	0	0	0	0
	10-19	15	68.2659	2.21117	4.57766	0.647284	1.46978	0.359602	0.806427	0.221117	0.504208	150.947	312.498	44.1874	100.336	24.5485	55.0514	15.0947	34.4202
	20-29	25	58.5115	15.4782	32.0436	4.53099	10.2884	2.51721	5.64499	1.54782	3.52946	905.653	1874.92	265.115	601.993	147.286	330.297	90.5653	206.514
	30-39	35	48.8546	19.9005	41.1989	5.82555	13.228	3.23642	7.25784	1.99005	4.53787	972.232	2012.76	284.605	646.248	158.114	354.579	97.2232	221.696
	40-49	45	39.3018	46.4346	96.1308	13.593	30.8653	7.55164	16.935	4.64346	10.5884	1824.96	3778.11	534.227	1213.06	296.793	665.574	182.496	416.142
	50-59	55	30.0933	121.614	251.771	35.6006	80.8378	19.7781	44.3535	12.1614	27.7314	3659.78	7576.62	1071.34	2432.67	595.188	1334.74	365.978	834.53
	60-69	65	21.403	207.85	430.3	60.8447	138.159	33.8026	75.8041	20.785	47.3956	4448.61	9209.69	1302.26	2957.01	723.476	1622.43	444.861	1014.41
	70-79	75	13.4485	557.215	1153.57	163.116	370.384	90.6197	203.22	55.7215	127.06	7493.71	15513.8	2193.66	4981.11	1218.7	2733	749.371	1708.77
	80-89	85	7.10454	1121.06	2320.87	328.173	745.178	182.318	408.858	112.106	255.634	7964.64	16488.7	2331.52	5294.14	1295.29	2904.75	796.464	1816.16
	90-100	95	3.45069	798.233	1652.53	233.669	530.59	129.816	291.12	79.8233	182.019	2754.45	5702.38	806.32	1830.9	447.955	1004.56	275.445	628.091
	weighted mean/Total			2890	5983	846	1921	470	1054	289	659	30175	62469.5	8833.23	20057.5	4907.35	11005	3017.5	6880.73
Morbidity (YLD)
PARAMETERS
AUSTALIAN POPULATION			Scenario 2A_V (Vaccinated)	Scenario 2A_U (Unvaccinated)	Scenario 2B_V (Vaccinated)	Scenario 2B_U (Unvaccinated)	Scenario 2C_V (Vaccinated)	Scenario 2C_U (Unvaccinated)	Scenario 2D_V (Vaccinated)	Scenario 2D_U (Unvaccinated)			Scenario 2A_V (Vaccinated)	Scenario 2A_U (Unvaccinated)	Scenario 2B_V (Vaccinated)	Scenario 2B_U (Unvaccinated)	Scenario 2C_V (Vaccinated)	Scenario 2C_U (Unvaccinated)	Scenario 2D_V (Vaccinated)	Scenario 2D_U (Unvaccinated)		PICS:ICU Survival	Scenario 2A_V (Vaccinated)	Scenario 2A_U (Unvaccinated)	Scenario 2B_V (Vaccinated)	Scenario 2B_U (Unvaccinated)	Scenario 2C_V (Vaccinated)	Scenario 2C_U (Unvaccinated)	Scenario 2D_V (Vaccinated)	Scenario 2D_U (Unvaccinated)
Australian COVID case (without death)			229041	961849	72744	365658	39560	205315	24041	131810		Moderate	214129	925121	68312	353047	37165	198249	22573	127380		60-69	447.522	490.768	118.805	135.083	64.6259	70.9427	38.1438	42.2741
Australian poulation as of 31Dec2020 (e)			25694393	25694393	25694393	25694393	25694393	25694393	25694393	25694393		Severe	13941	34607	4211	11948	2287	6682	1415	4215		70-79	204.89	224.689	54.3925	61.8451	29.5877	32.4798	17.4634	19.3544
Australian COVID case with deaths			231931	967832	73590	367579	40030	206369	24330	132469		Critical	3861	8104	1067	2584	578	1438	342	874		80-89	48.5265	53.2158	12.8824	14.6475	7.00762	7.69258	4.13608	4.58393
Ausrtalian COVID cases (>10 and above)			229041	571640	72744	214146	39560	121924	24041	77397.1												90+	0	0	0	0	0	0	0	0
Australian COVID cases (Hosp without death; >30 years old)			166495	242100	51979.1	88246.8	28138.9	50498.9	17250.4	31712.4												Totals	700.938	768.673	186.08	211.575	101.221	111.115	59.7434	66.2124
YEAR			365.25
DISABILITY WEIGHTS (g)			MID	LL	UL	sigma	alpha1	alpha2	ERSATZ
DW(Moderate)			0.051	0.032	0.074	0.0107143	21.4511	399.158	#NAME?
DW(Severe)			0.133	0.088	0.19	0.0260204	22.5184	146.793	#NAME?
DW(Critical)			0.655	0.579	0.727	0.0377551	103.182	54.3476	#NAME?
DW(Chronic)			0.219	0.148	0.308	0.0408163	22.2649	79.4013	#NAME?
DW(Afib as proxy for PICS) (i)			0.224	0.151	0.312	0.0410714	22.8582	79.1875	#NAME?
SEVERITY DISTRIBUTION
ACUTE (Proportion)			%	Duration (days)
N Asymptomatic (will not be added in the YLD) (h)			NA	14
N(Moderate) (a)			NA	14
N(Severe) (a)			NA	14
N(Critical)* (a)			NA	14
CHRONIC			%	Duration (days)		OR	95%CI LL	95%CI UL	RR	LL	UL	SE	ERSATZ
Post (acute) after symptomatic duration to 2 years			See ONS Post-Acute Sheet		Treatment effect of full dose of COVID vaccine	0.51	0.32	0.82	0.540174	0.346891	0.837179	0.0923705	#NAME?
Post-intesive care syndrome			%	Duration (days)
1) PICS			0.906	RLE
Permanent functional impairment			%	LL	UL		Duration	sigma	alpha1	alpha2	ERSATZ
2) Diabetes			0.0282921	0.0256649	0.0312028		RLE	0.00141273	389.685	13384	#NAME?
3) Parkinsons			0.0011	0.00079	0.0014		RLE	0.000155612	49.9126	45325.2	#NAME?
4) Dementia			0.0067	0.0059	0.0075		RLE	0.000408163	267.64	39678.7	#NAME?
5) Anxiety Disorders			0.0711	0.0682	0.0741		RLE	0.0015051	2072.82	27080.8	#NAME?
5) Ischaemic Stroke			0.0076	0.0068	0.0085		RLE	0.000433673	304.774	39797	#NAME?
ACUTE
Morbidity calculation (Total incidence cases/Checking/Scenario analysis)
			Scenario 2A						Scenario 2B						Scenario 2C						Scenario 2D
			Scenario 2A_V (Vaccinated)			Scenario 2A_U (Unvaccinated)			Scenario 2B_V (Vaccinated)			Scenario 2B_U (Unvaccinated)			Scenario 2C_V (Vaccinated)			Scenario 2C_U (Unvaccinated)			Scenario 2D_V (Vaccinated)			Scenario 2D_U (Unvaccinated)
				Case (Person - years)	YLD		Case (Person - years)	YLD		Case (Person - years)	YLD		Case (Person - years)	YLD		Case (Person - years)	YLD		Case (Person - years)	YLD		Case (Person - years)	YLD		Case (Person - years)	YLD
			Base	Base	Base DL	Base	Base	Base DL	Base	Base	Base DL	Base	Base	Base DL	Base	Base	Base DL	Base	Base	Base DL	Base	Base	Base DL	Base	Base	Base DL
	Moderate		214129	8207.55	#NAME?	925121	35459.8	#NAME?	68312	2618.39	#NAME?	353047	13532.3	#NAME?	37165	1424.53	#NAME?	198249	7598.87	#NAME?	22573	865.221	#NAME?	127380	4882.46	#NAME?
	Severe		13941	534.357	#NAME?	34607	1326.48	#NAME?	4211	161.407	#NAME?	11948	457.966	#NAME?	2287	87.6605	#NAME?	6682	256.12	#NAME?	1415	54.2368	#NAME?	4215	161.561	#NAME?
	Critical		3861	147.992	#NAME?	8104	310.626	#NAME?	1067	40.898	#NAME?	2584	99.0445	#NAME?	578	22.1547	#NAME?	1438	55.1184	#NAME?	342	13.1088	#NAME?	874	33.5003	#NAME?
	TOTAL				#NAME?			#NAME?			#NAME?			#NAME?			#NAME?			#NAME?			#NAME?			#NAME?
CHRONIC/LONG COVID
										SCENARIO 2A								SCENARIO 2B								SCENARIO 2C								SCENARIO 2D
			NSW			ERSATZ				Scenario 2A_V (Vaccinated)				Scenario 2A_U (Unvaccinated)				Scenario 2B_V (Vaccinated)				Scenario 2B_U (Unvaccinated)				Scenario 2C_V (Vaccinated)				Scenario 2C_U (Unvaccinated)				Scenario 2D_V (Vaccinated)				Scenario 2D_U (Unvaccinated)
	weeks		Baseline	LL	UL	sigma	alpha1	alpha2	Ersazt	Recalculation (mutually exclusive)	Incidence	DALYs/year	DALYS per 100,000	Recalculation (mutually exclusive)	Incidence	DALYs/year	DALYS per 100,000	Recalculation (mutually exclusive)	Incidence	DALYs/year	DALYS per 100,000	Recalculation (mutually exclusive)	Incidence	DALYs/year	DALYS per 100,000	Recalculation (mutually exclusive)	Incidence	DALYs/year	DALYS per 100,000	Recalculation (mutually exclusive)	Incidence	DALYs/year	DALYS per 100,000	Recalculation (mutually exclusive)	Incidence	DALYs/year	DALYS per 100,000	Recalculation (mutually exclusive)	Incidence	DALYs/year	DALYS per 100,000
	0		0.5629	0.5997	0.5276	-0.0183929	408.834	317.466	#NAME?	#NAME?	#NAME?	#NAME?	#NAME?	#NAME?	#NAME?	#NAME?	#NAME?	#NAME?	#NAME?	#NAME?	#NAME?	#NAME?	#NAME?	#NAME?	#NAME?	#NAME?	#NAME?	#NAME?	#NAME?	#NAME?	#NAME?	#NAME?	#NAME?	#NAME?	#NAME?	#NAME?	#NAME?	#NAME?	#NAME?	#NAME?	#NAME?
	1		0.47395	0.491484	0.45593	-0.00907002	1435.93	1593.77	#NAME?	#NAME?	#NAME?	#NAME?	#NAME?	#NAME?	#NAME?	#NAME?	#NAME?	#NAME?	#NAME?	#NAME?	#NAME?	#NAME?	#NAME?	#NAME?	#NAME?	#NAME?	#NAME?	#NAME?	#NAME?	#NAME?	#NAME?	#NAME?	#NAME?	#NAME?	#NAME?	#NAME?	#NAME?	#NAME?	#NAME?	#NAME?	#NAME?
	2		0.399056	0.402796	0.393995	-0.00224506	18986.1	28591.5	#NAME?	#NAME?	#NAME?	#NAME?	#NAME?	#NAME?	#NAME?	#NAME?	#NAME?	#NAME?	#NAME?	#NAME?	#NAME?	#NAME?	#NAME?	#NAME?	#NAME?	#NAME?	#NAME?	#NAME?	#NAME?	#NAME?	#NAME?	#NAME?	#NAME?	#NAME?	#NAME?	#NAME?	#NAME?	#NAME?	#NAME?	#NAME?	#NAME?
	3		0.335997	0.330111	0.340474	0.00264354	10726.4	21197.7	#NAME?	#NAME?	#NAME?	#NAME?	#NAME?	#NAME?	#NAME?	#NAME?	#NAME?	#NAME?	#NAME?	#NAME?	#NAME?	#NAME?	#NAME?	#NAME?	#NAME?	#NAME?	#NAME?	#NAME?	#NAME?	#NAME?	#NAME?	#NAME?	#NAME?	#NAME?	#NAME?	#NAME?	#NAME?	#NAME?	#NAME?	#NAME?	#NAME?
	4		0.282902	0.270543	0.294223	0.00604095	1572.4	3985.69	#NAME?	#NAME?	#NAME?	#NAME?	#NAME?	#NAME?	#NAME?	#NAME?	#NAME?	#NAME?	#NAME?	#NAME?	#NAME?	#NAME?	#NAME?	#NAME?	#NAME?	#NAME?	#NAME?	#NAME?	#NAME?	#NAME?	#NAME?	#NAME?	#NAME?	#NAME?	#NAME?	#NAME?	#NAME?	#NAME?	#NAME?	#NAME?	#NAME?
	5		0.238198	0.221723	0.254255	0.00829899	627.34	2006.35	#NAME?	#NAME?	#NAME?	#NAME?	#NAME?	#NAME?	#NAME?	#NAME?	#NAME?	#NAME?	#NAME?	#NAME?	#NAME?	#NAME?	#NAME?	#NAME?	#NAME?	#NAME?	#NAME?	#NAME?	#NAME?	#NAME?	#NAME?	#NAME?	#NAME?	#NAME?	#NAME?	#NAME?	#NAME?	#NAME?	#NAME?	#NAME?	#NAME?
	6		0.200558	0.181713	0.219717	0.00969474	341.931	1362.97	#NAME?	#NAME?	#NAME?	#NAME?	#NAME?	#NAME?	#NAME?	#NAME?	#NAME?	#NAME?	#NAME?	#NAME?	#NAME?	#NAME?	#NAME?	#NAME?	#NAME?	#NAME?	#NAME?	#NAME?	#NAME?	#NAME?	#NAME?	#NAME?	#NAME?	#NAME?	#NAME?	#NAME?	#NAME?	#NAME?	#NAME?	#NAME?	#NAME?
	7		0.168865	0.148923	0.18987	0.0104456	217.044	1068.26	#NAME?	#NAME?	#NAME?	#NAME?	#NAME?	#NAME?	#NAME?	#NAME?	#NAME?	#NAME?	#NAME?	#NAME?	#NAME?	#NAME?	#NAME?	#NAME?	#NAME?	#NAME?	#NAME?	#NAME?	#NAME?	#NAME?	#NAME?	#NAME?	#NAME?	#NAME?	#NAME?	#NAME?	#NAME?	#NAME?	#NAME?	#NAME?	#NAME?
	8		0.142181	0.12205	0.164077	0.0107213	150.721	909.342	#NAME?	#NAME?	#NAME?	#NAME?	#NAME?	#NAME?	#NAME?	#NAME?	#NAME?	#NAME?	#NAME?	#NAME?	#NAME?	#NAME?	#NAME?	#NAME?	#NAME?	#NAME?	#NAME?	#NAME?	#NAME?	#NAME?	#NAME?	#NAME?	#NAME?	#NAME?	#NAME?	#NAME?	#NAME?	#NAME?	#NAME?	#NAME?	#NAME?
	9		0.119714	0.100026	0.141789	0.0106538	111.029	816.424	#NAME?	#NAME?	#NAME?	#NAME?	#NAME?	#NAME?	#NAME?	#NAME?	#NAME?	#NAME?	#NAME?	#NAME?	#NAME?	#NAME?	#NAME?	#NAME?	#NAME?	#NAME?	#NAME?	#NAME?	#NAME?	#NAME?	#NAME?	#NAME?	#NAME?	#NAME?	#NAME?	#NAME?	#NAME?	#NAME?	#NAME?	#NAME?	#NAME?
	10		0.100796	0.0819762	0.122528	0.0103448	85.2688	760.683	#NAME?	#NAME?	#NAME?	#NAME?	#NAME?	#NAME?	#NAME?	#NAME?	#NAME?	#NAME?	#NAME?	#NAME?	#NAME?	#NAME?	#NAME?	#NAME?	#NAME?	#NAME?	#NAME?	#NAME?	#NAME?	#NAME?	#NAME?	#NAME?	#NAME?	#NAME?	#NAME?	#NAME?	#NAME?	#NAME?	#NAME?	#NAME?	#NAME?
	11		0.0848684	0.0671836	0.105883	0.00987239	67.5438	728.322	#NAME?	#NAME?	#NAME?	#NAME?	#NAME?	#NAME?	#NAME?	#NAME?	#NAME?	#NAME?	#NAME?	#NAME?	#NAME?	#NAME?	#NAME?	#NAME?	#NAME?	#NAME?	#NAME?	#NAME?	#NAME?	#NAME?	#NAME?	#NAME?	#NAME?	#NAME?	#NAME?	#NAME?	#NAME?	#NAME?	#NAME?	#NAME?	#NAME?
	12		0.0714574	0.0550603	0.0914999	0.00929582	54.7968	712.049	#NAME?	#NAME?	#NAME?	#NAME?	#NAME?	#NAME?	#NAME?	#NAME?	#NAME?	#NAME?	#NAME?	#NAME?	#NAME?	#NAME?	#NAME?	#NAME?	#NAME?	#NAME?	#NAME?	#NAME?	#NAME?	#NAME?	#NAME?	#NAME?	#NAME?	#NAME?	#NAME?	#NAME?	#NAME?	#NAME?	#NAME?	#NAME?	#NAME?
	13		0.0601657	0.0451247	0.0790704	0.00865962	45.308	707.747	#NAME?	#NAME?	#NAME?	#NAME?	#NAME?	#NAME?	#NAME?	#NAME?	#NAME?	#NAME?	#NAME?	#NAME?	#NAME?	#NAME?	#NAME?	#NAME?	#NAME?	#NAME?	#NAME?	#NAME?	#NAME?	#NAME?	#NAME?	#NAME?	#NAME?	#NAME?	#NAME?	#NAME?	#NAME?	#NAME?	#NAME?	#NAME?	#NAME?
	14		0.0506582	0.0369819	0.0683293	0.00799677	38.0466	712.997	#NAME?	#NAME?	#NAME?	#NAME?	#NAME?	#NAME?	#NAME?	#NAME?	#NAME?	#NAME?	#NAME?	#NAME?	#NAME?	#NAME?	#NAME?	#NAME?	#NAME?	#NAME?	#NAME?	#NAME?	#NAME?	#NAME?	#NAME?	#NAME?	#NAME?	#NAME?	#NAME?	#NAME?	#NAME?	#NAME?	#NAME?	#NAME?	#NAME?
	15		0.0426532	0.0303085	0.0590473	0.00733131	32.3621	726.365	#NAME?	#NAME?	#NAME?	#NAME?	#NAME?	#NAME?	#NAME?	#NAME?	#NAME?	#NAME?	#NAME?	#NAME?	#NAME?	#NAME?	#NAME?	#NAME?	#NAME?	#NAME?	#NAME?	#NAME?	#NAME?	#NAME?	#NAME?	#NAME?	#NAME?	#NAME?	#NAME?	#NAME?	#NAME?	#NAME?	#NAME?	#NAME?	#NAME?
	16		0.0359131	0.0248394	0.0510262	0.00668031	27.8272	747.02	#NAME?	#NAME?	#NAME?	#NAME?	#NAME?	#NAME?	#NAME?	#NAME?	#NAME?	#NAME?	#NAME?	#NAME?	#NAME?	#NAME?	#NAME?	#NAME?	#NAME?	#NAME?	#NAME?	#NAME?	#NAME?	#NAME?	#NAME?	#NAME?	#NAME?	#NAME?	#NAME?	#NAME?	#NAME?	#NAME?	#NAME?	#NAME?	#NAME?
	17		0.0302381	0.0203571	0.0440946	0.0060555	24.1507	774.535	#NAME?	#NAME?	#NAME?	#NAME?	#NAME?	#NAME?	#NAME?	#NAME?	#NAME?	#NAME?	#NAME?	#NAME?	#NAME?	#NAME?	#NAME?	#NAME?	#NAME?	#NAME?	#NAME?	#NAME?	#NAME?	#NAME?	#NAME?	#NAME?	#NAME?	#NAME?	#NAME?	#NAME?	#NAME?	#NAME?	#NAME?	#NAME?	#NAME?
	18		0.0254598	0.0166837	0.0381047	0.00546456	21.1289	808.764	#NAME?	#NAME?	#NAME?	#NAME?	#NAME?	#NAME?	#NAME?	#NAME?	#NAME?	#NAME?	#NAME?	#NAME?	#NAME?	#NAME?	#NAME?	#NAME?	#NAME?	#NAME?	#NAME?	#NAME?	#NAME?	#NAME?	#NAME?	#NAME?	#NAME?	#NAME?	#NAME?	#NAME?	#NAME?	#NAME?	#NAME?	#NAME?	#NAME?
	19		0.0214366	0.0136731	0.0329285	0.00491209	18.6153	849.77	#NAME?	#NAME?	#NAME?	#NAME?	#NAME?	#NAME?	#NAME?	#NAME?	#NAME?	#NAME?	#NAME?	#NAME?	#NAME?	#NAME?	#NAME?	#NAME?	#NAME?	#NAME?	#NAME?	#NAME?	#NAME?	#NAME?	#NAME?	#NAME?	#NAME?	#NAME?	#NAME?	#NAME?	#NAME?	#NAME?	#NAME?	#NAME?	#NAME?
`	20		0.0180492	0.0112058	0.0284554	0.00440042	16.5023	897.791	#NAME?	#NAME?	#NAME?	#NAME?	#NAME?	#NAME?	#NAME?	#NAME?	#NAME?	#NAME?	#NAME?	#NAME?	#NAME?	#NAME?	#NAME?	#NAME?	#NAME?	#NAME?	#NAME?	#NAME?	#NAME?	#NAME?	#NAME?	#NAME?	#NAME?	#NAME?	#NAME?	#NAME?	#NAME?	#NAME?	#NAME?	#NAME?	#NAME?
	21		0.0151971	0.00918369	0.02459	0.00393017	14.7095	953.206	#NAME?	#NAME?	#NAME?	#NAME?	#NAME?	#NAME?	#NAME?	#NAME?	#NAME?	#NAME?	#NAME?	#NAME?	#NAME?	#NAME?	#NAME?	#NAME?	#NAME?	#NAME?	#NAME?	#NAME?	#NAME?	#NAME?	#NAME?	#NAME?	#NAME?	#NAME?	#NAME?	#NAME?	#NAME?	#NAME?	#NAME?	#NAME?	#NAME?
	22		0.0127956	0.0075265	0.0212496	0.00350079	13.1757	1016.53	#NAME?	#NAME?	#NAME?	#NAME?	#NAME?	#NAME?	#NAME?	#NAME?	#NAME?	#NAME?	#NAME?	#NAME?	#NAME?	#NAME?	#NAME?	#NAME?	#NAME?	#NAME?	#NAME?	#NAME?	#NAME?	#NAME?	#NAME?	#NAME?	#NAME?	#NAME?	#NAME?	#NAME?	#NAME?	#NAME?	#NAME?	#NAME?	#NAME?
	23		0.0107736	0.00616834	0.018363	0.00311089	11.8538	1088.41	#NAME?	#NAME?	#NAME?	#NAME?	#NAME?	#NAME?	#NAME?	#NAME?	#NAME?	#NAME?	#NAME?	#NAME?	#NAME?	#NAME?	#NAME?	#NAME?	#NAME?	#NAME?	#NAME?	#NAME?	#NAME?	#NAME?	#NAME?	#NAME?	#NAME?	#NAME?	#NAME?	#NAME?	#NAME?	#NAME?	#NAME?	#NAME?	#NAME?
	24		0.00907118	0.00505526	0.0158685	0.00275849	10.7068	1169.6	#NAME?	#NAME?	#NAME?	#NAME?	#NAME?	#NAME?	#NAME?	#NAME?	#NAME?	#NAME?	#NAME?	#NAME?	#NAME?	#NAME?	#NAME?	#NAME?	#NAME?	#NAME?	#NAME?	#NAME?	#NAME?	#NAME?	#NAME?	#NAME?	#NAME?	#NAME?	#NAME?	#NAME?	#NAME?	#NAME?	#NAME?	#NAME?	#NAME?
	25		0.00763774	0.00414304	0.0137129	0.0024413	9.70549	1261.02	#NAME?	#NAME?	#NAME?	#NAME?	#NAME?	#NAME?	#NAME?	#NAME?	#NAME?	#NAME?	#NAME?	#NAME?	#NAME?	#NAME?	#NAME?	#NAME?	#NAME?	#NAME?	#NAME?	#NAME?	#NAME?	#NAME?	#NAME?	#NAME?	#NAME?	#NAME?	#NAME?	#NAME?	#NAME?	#NAME?	#NAME?	#NAME?	#NAME?
	26		0.00643082	0.00339543	0.0118501	0.00215681	8.82654	1363.71	#NAME?	#NAME?	#NAME?	#NAME?	#NAME?	#NAME?	#NAME?	#NAME?	#NAME?	#NAME?	#NAME?	#NAME?	#NAME?	#NAME?	#NAME?	#NAME?	#NAME?	#NAME?	#NAME?	#NAME?	#NAME?	#NAME?	#NAME?	#NAME?	#NAME?	#NAME?	#NAME?	#NAME?	#NAME?	#NAME?	#NAME?	#NAME?	#NAME?
	27		0.00541462	0.00278272	0.0102404	0.00190246	8.05106	1478.86	#NAME?	#NAME?	#NAME?	#NAME?	#NAME?	#NAME?	#NAME?	#NAME?	#NAME?	#NAME?	#NAME?	#NAME?	#NAME?	#NAME?	#NAME?	#NAME?	#NAME?	#NAME?	#NAME?	#NAME?	#NAME?	#NAME?	#NAME?	#NAME?	#NAME?	#NAME?	#NAME?	#NAME?	#NAME?	#NAME?	#NAME?	#NAME?	#NAME?
	28		0.00455899	0.00228058	0.0088493	0.00167569	7.36369	1607.84	#NAME?	#NAME?	#NAME?	#NAME?	#NAME?	#NAME?	#NAME?	#NAME?	#NAME?	#NAME?	#NAME?	#NAME?	#NAME?	#NAME?	#NAME?	#NAME?	#NAME?	#NAME?	#NAME?	#NAME?	#NAME?	#NAME?	#NAME?	#NAME?	#NAME?	#NAME?	#NAME?	#NAME?	#NAME?	#NAME?	#NAME?	#NAME?	#NAME?
	29		0.00383858	0.00186905	0.00764719	0.00147402	6.75179	1752.18	#NAME?	#NAME?	#NAME?	#NAME?	#NAME?	#NAME?	#NAME?	#NAME?	#NAME?	#NAME?	#NAME?	#NAME?	#NAME?	#NAME?	#NAME?	#NAME?	#NAME?	#NAME?	#NAME?	#NAME?	#NAME?	#NAME?	#NAME?	#NAME?	#NAME?	#NAME?	#NAME?	#NAME?	#NAME?	#NAME?	#NAME?	#NAME?	#NAME?
	30		0.003232	0.00153178	0.00660838	0.00129505	6.20494	1913.64	#NAME?	#NAME?	#NAME?	#NAME?	#NAME?	#NAME?	#NAME?	#NAME?	#NAME?	#NAME?	#NAME?	#NAME?	#NAME?	#NAME?	#NAME?	#NAME?	#NAME?	#NAME?	#NAME?	#NAME?	#NAME?	#NAME?	#NAME?	#NAME?	#NAME?	#NAME?	#NAME?	#NAME?	#NAME?	#NAME?	#NAME?	#NAME?	#NAME?
	31		0.00272128	0.00125537	0.00571068	0.00113656	5.71441	2094.19	#NAME?	#NAME?	#NAME?	#NAME?	#NAME?	#NAME?	#NAME?	#NAME?	#NAME?	#NAME?	#NAME?	#NAME?	#NAME?	#NAME?	#NAME?	#NAME?	#NAME?	#NAME?	#NAME?	#NAME?	#NAME?	#NAME?	#NAME?	#NAME?	#NAME?	#NAME?	#NAME?	#NAME?	#NAME?	#NAME?	#NAME?	#NAME?	#NAME?
	32		0.00229126	0.00102884	0.00493493	0.000996452	5.27292	2296.05	#NAME?	#NAME?	#NAME?	#NAME?	#NAME?	#NAME?	#NAME?	#NAME?	#NAME?	#NAME?	#NAME?	#NAME?	#NAME?	#NAME?	#NAME?	#NAME?	#NAME?	#NAME?	#NAME?	#NAME?	#NAME?	#NAME?	#NAME?	#NAME?	#NAME?	#NAME?	#NAME?	#NAME?	#NAME?	#NAME?	#NAME?	#NAME?	#NAME?
	33		0.00192919	0.000843184	0.00426456	0.000872799	4.8743	2521.72	#NAME?	#NAME?	#NAME?	#NAME?	#NAME?	#NAME?	#NAME?	#NAME?	#NAME?	#NAME?	#NAME?	#NAME?	#NAME?	#NAME?	#NAME?	#NAME?	#NAME?	#NAME?	#NAME?	#NAME?	#NAME?	#NAME?	#NAME?	#NAME?	#NAME?	#NAME?	#NAME?	#NAME?	#NAME?	#NAME?	#NAME?	#NAME?	#NAME?
	34		0.00162434	0.000691031	0.00368525	0.000763831	4.51333	2774.05	#NAME?	#NAME?	#NAME?	#NAME?	#NAME?	#NAME?	#NAME?	#NAME?	#NAME?	#NAME?	#NAME?	#NAME?	#NAME?	#NAME?	#NAME?	#NAME?	#NAME?	#NAME?	#NAME?	#NAME?	#NAME?	#NAME?	#NAME?	#NAME?	#NAME?	#NAME?	#NAME?	#NAME?	#NAME?	#NAME?	#NAME?	#NAME?	#NAME?
	35		0.00136766	0.000566334	0.00318464	0.000667934	4.18555	3056.19	#NAME?	#NAME?	#NAME?	#NAME?	#NAME?	#NAME?	#NAME?	#NAME?	#NAME?	#NAME?	#NAME?	#NAME?	#NAME?	#NAME?	#NAME?	#NAME?	#NAME?	#NAME?	#NAME?	#NAME?	#NAME?	#NAME?	#NAME?	#NAME?	#NAME?	#NAME?	#NAME?	#NAME?	#NAME?	#NAME?	#NAME?	#NAME?	#NAME?
	36		0.00115154	0.000464139	0.00275203	0.000583645	3.88716	3371.73	#NAME?	#NAME?	#NAME?	#NAME?	#NAME?	#NAME?	#NAME?	#NAME?	#NAME?	#NAME?	#NAME?	#NAME?	#NAME?	#NAME?	#NAME?	#NAME?	#NAME?	#NAME?	#NAME?	#NAME?	#NAME?	#NAME?	#NAME?	#NAME?	#NAME?	#NAME?	#NAME?	#NAME?	#NAME?	#NAME?	#NAME?	#NAME?	#NAME?
	37		0.000969574	0.000380385	0.00237819	0.000509643	3.61486	3724.68	#NAME?	#NAME?	#NAME?	#NAME?	#NAME?	#NAME?	#NAME?	#NAME?	#NAME?	#NAME?	#NAME?	#NAME?	#NAME?	#NAME?	#NAME?	#NAME?	#NAME?	#NAME?	#NAME?	#NAME?	#NAME?	#NAME?	#NAME?	#NAME?	#NAME?	#NAME?	#NAME?	#NAME?	#NAME?	#NAME?	#NAME?	#NAME?	#NAME?
	38		0.000816361	0.000311745	0.00205513	0.000444741	3.36582	4119.59	#NAME?	#NAME?	#NAME?	#NAME?	#NAME?	#NAME?	#NAME?	#NAME?	#NAME?	#NAME?	#NAME?	#NAME?	#NAME?	#NAME?	#NAME?	#NAME?	#NAME?	#NAME?	#NAME?	#NAME?	#NAME?	#NAME?	#NAME?	#NAME?	#NAME?	#NAME?	#NAME?	#NAME?	#NAME?	#NAME?	#NAME?	#NAME?	#NAME?
	39		0.000687359	0.00025549	0.00177596	0.000387874	3.13757	4561.53	#NAME?	#NAME?	#NAME?	#NAME?	#NAME?	#NAME?	#NAME?	#NAME?	#NAME?	#NAME?	#NAME?	#NAME?	#NAME?	#NAME?	#NAME?	#NAME?	#NAME?	#NAME?	#NAME?	#NAME?	#NAME?	#NAME?	#NAME?	#NAME?	#NAME?	#NAME?	#NAME?	#NAME?	#NAME?	#NAME?	#NAME?	#NAME?	#NAME?
	40		0.000578742	0.000209387	0.00153471	0.000338091	2.92796	5056.25	#NAME?	#NAME?	#NAME?	#NAME?	#NAME?	#NAME?	#NAME?	#NAME?	#NAME?	#NAME?	#NAME?	#NAME?	#NAME?	#NAME?	#NAME?	#NAME?	#NAME?	#NAME?	#NAME?	#NAME?	#NAME?	#NAME?	#NAME?	#NAME?	#NAME?	#NAME?	#NAME?	#NAME?	#NAME?	#NAME?	#NAME?	#NAME?	#NAME?
	41		0.000487289	0.000171603	0.00132623	0.000294547	2.73511	5610.18	#NAME?	#NAME?	#NAME?	#NAME?	#NAME?	#NAME?	#NAME?	#NAME?	#NAME?	#NAME?	#NAME?	#NAME?	#NAME?	#NAME?	#NAME?	#NAME?	#NAME?	#NAME?	#NAME?	#NAME?	#NAME?	#NAME?	#NAME?	#NAME?	#NAME?	#NAME?	#NAME?	#NAME?	#NAME?	#NAME?	#NAME?	#NAME?	#NAME?
	42		0.000410287	0.000140637	0.00114607	0.000256488	2.55737	6230.58	#NAME?	#NAME?	#NAME?	#NAME?	#NAME?	#NAME?	#NAME?	#NAME?	#NAME?	#NAME?	#NAME?	#NAME?	#NAME?	#NAME?	#NAME?	#NAME?	#NAME?	#NAME?	#NAME?	#NAME?	#NAME?	#NAME?	#NAME?	#NAME?	#NAME?	#NAME?	#NAME?	#NAME?	#NAME?	#NAME?	#NAME?	#NAME?	#NAME?
	43		0.000345453	0.000115259	0.000990385	0.000223246	2.3933	6925.61	#NAME?	#NAME?	#NAME?	#NAME?	#NAME?	#NAME?	#NAME?	#NAME?	#NAME?	#NAME?	#NAME?	#NAME?	#NAME?	#NAME?	#NAME?	#NAME?	#NAME?	#NAME?	#NAME?	#NAME?	#NAME?	#NAME?	#NAME?	#NAME?	#NAME?	#NAME?	#NAME?	#NAME?	#NAME?	#NAME?	#NAME?	#NAME?	#NAME?
	44		0.000290864	9.44608e-05	0.000855849	0.000194232	2.2416	7704.45	#NAME?	#NAME?	#NAME?	#NAME?	#NAME?	#NAME?	#NAME?	#NAME?	#NAME?	#NAME?	#NAME?	#NAME?	#NAME?	#NAME?	#NAME?	#NAME?	#NAME?	#NAME?	#NAME?	#NAME?	#NAME?	#NAME?	#NAME?	#NAME?	#NAME?	#NAME?	#NAME?	#NAME?	#NAME?	#NAME?	#NAME?	#NAME?	#NAME?
	45		0.000244902	7.74153e-05	0.000739588	0.000168922	2.10115	8577.44	#NAME?	#NAME?	#NAME?	#NAME?	#NAME?	#NAME?	#NAME?	#NAME?	#NAME?	#NAME?	#NAME?	#NAME?	#NAME?	#NAME?	#NAME?	#NAME?	#NAME?	#NAME?	#NAME?	#NAME?	#NAME?	#NAME?	#NAME?	#NAME?	#NAME?	#NAME?	#NAME?	#NAME?	#NAME?	#NAME?	#NAME?	#NAME?	#NAME?
	46		0.000206202	6.34457e-05	0.000639121	0.000146856	1.97092	9556.21	#NAME?	#NAME?	#NAME?	#NAME?	#NAME?	#NAME?	#NAME?	#NAME?	#NAME?	#NAME?	#NAME?	#NAME?	#NAME?	#NAME?	#NAME?	#NAME?	#NAME?	#NAME?	#NAME?	#NAME?	#NAME?	#NAME?	#NAME?	#NAME?	#NAME?	#NAME?	#NAME?	#NAME?	#NAME?	#NAME?	#NAME?	#NAME?	#NAME?
	47		0.000173618	5.19969e-05	0.000552301	0.000127629	1.85002	10653.9	#NAME?	#NAME?	#NAME?	#NAME?	#NAME?	#NAME?	#NAME?	#NAME?	#NAME?	#NAME?	#NAME?	#NAME?	#NAME?	#NAME?	#NAME?	#NAME?	#NAME?	#NAME?	#NAME?	#NAME?	#NAME?	#NAME?	#NAME?	#NAME?	#NAME?	#NAME?	#NAME?	#NAME?	#NAME?	#NAME?	#NAME?	#NAME?	#NAME?
	48		0.000146183	4.26141e-05	0.000477275	0.000110883	1.73765	11885.1	#NAME?	#NAME?	#NAME?	#NAME?	#NAME?	#NAME?	#NAME?	#NAME?	#NAME?	#NAME?	#NAME?	#NAME?	#NAME?	#NAME?	#NAME?	#NAME?	#NAME?	#NAME?	#NAME?	#NAME?	#NAME?	#NAME?	#NAME?	#NAME?	#NAME?	#NAME?	#NAME?	#NAME?	#NAME?	#NAME?	#NAME?	#NAME?	#NAME?
	49		0.000123083	3.49244e-05	0.000412441	9.63053e-05	1.63308	13266.5	#NAME?	#NAME?	#NAME?	#NAME?	#NAME?	#NAME?	#NAME?	#NAME?	#NAME?	#NAME?	#NAME?	#NAME?	#NAME?	#NAME?	#NAME?	#NAME?	#NAME?	#NAME?	#NAME?	#NAME?	#NAME?	#NAME?	#NAME?	#NAME?	#NAME?	#NAME?	#NAME?	#NAME?	#NAME?	#NAME?	#NAME?	#NAME?	#NAME?
	50		0.000103633	2.86223e-05	0.000356414	8.36204e-05	1.53567	14816.8	#NAME?	#NAME?	#NAME?	#NAME?	#NAME?	#NAME?	#NAME?	#NAME?	#NAME?	#NAME?	#NAME?	#NAME?	#NAME?	#NAME?	#NAME?	#NAME?	#NAME?	#NAME?	#NAME?	#NAME?	#NAME?	#NAME?	#NAME?	#NAME?	#NAME?	#NAME?	#NAME?	#NAME?	#NAME?	#NAME?	#NAME?	#NAME?	#NAME?
	51		8.7257e-05	2.34574e-05	0.000307998	7.25869e-05	1.44484	16557	#NAME?	#NAME?	#NAME?	#NAME?	#NAME?	#NAME?	#NAME?	#NAME?	#NAME?	#NAME?	#NAME?	#NAME?	#NAME?	#NAME?	#NAME?	#NAME?	#NAME?	#NAME?	#NAME?	#NAME?	#NAME?	#NAME?	#NAME?	#NAME?	#NAME?	#NAME?	#NAME?	#NAME?	#NAME?	#NAME?	#NAME?	#NAME?	#NAME?
	52		7.34685e-05	1.92245e-05	0.000266159	6.29935e-05	1.36005	18510.7	#NAME?	#NAME?	#NAME?	#NAME?	#NAME?	#NAME?	#NAME?	#NAME?	#NAME?	#NAME?	#NAME?	#NAME?	#NAME?	#NAME?	#NAME?	#NAME?	#NAME?	#NAME?	#NAME?	#NAME?	#NAME?	#NAME?	#NAME?	#NAME?	#NAME?	#NAME?	#NAME?	#NAME?	#NAME?	#NAME?	#NAME?	#NAME?	#NAME?
	53		6.1859e-05	1.57554e-05	0.000230003	5.46551e-05	1.28085	20704.6	#NAME?	#NAME?	#NAME?	#NAME?	#NAME?	#NAME?	#NAME?	#NAME?	#NAME?	#NAME?	#NAME?	#NAME?	#NAME?	#NAME?	#NAME?	#NAME?	#NAME?	#NAME?	#NAME?	#NAME?	#NAME?	#NAME?	#NAME?	#NAME?	#NAME?	#NAME?	#NAME?	#NAME?	#NAME?	#NAME?	#NAME?	#NAME?	#NAME?
	54		5.2084e-05	1.29124e-05	0.000198759	4.74099e-05	1.20678	23168.7	#NAME?	#NAME?	#NAME?	#NAME?	#NAME?	#NAME?	#NAME?	#NAME?	#NAME?	#NAME?	#NAME?	#NAME?	#NAME?	#NAME?	#NAME?	#NAME?	#NAME?	#NAME?	#NAME?	#NAME?	#NAME?	#NAME?	#NAME?	#NAME?	#NAME?	#NAME?	#NAME?	#NAME?	#NAME?	#NAME?	#NAME?	#NAME?	#NAME?
	55		4.38536e-05	1.05823e-05	0.000171759	4.11166e-05	1.13747	25936.8	#NAME?	#NAME?	#NAME?	#NAME?	#NAME?	#NAME?	#NAME?	#NAME?	#NAME?	#NAME?	#NAME?	#NAME?	#NAME?	#NAME?	#NAME?	#NAME?	#NAME?	#NAME?	#NAME?	#NAME?	#NAME?	#NAME?	#NAME?	#NAME?	#NAME?	#NAME?	#NAME?	#NAME?	#NAME?	#NAME?	#NAME?	#NAME?	#NAME?
	56		3.69238e-05	8.67274e-06	0.000148427	3.56516e-05	1.07257	29047	#NAME?	#NAME?	#NAME?	#NAME?	#NAME?	#NAME?	#NAME?	#NAME?	#NAME?	#NAME?	#NAME?	#NAME?	#NAME?	#NAME?	#NAME?	#NAME?	#NAME?	#NAME?	#NAME?	#NAME?	#NAME?	#NAME?	#NAME?	#NAME?	#NAME?	#NAME?	#NAME?	#NAME?	#NAME?	#NAME?	#NAME?	#NAME?	#NAME?
	57		3.10891e-05	7.10774e-06	0.000128264	3.09073e-05	1.01174	32542.1	#NAME?	#NAME?	#NAME?	#NAME?	#NAME?	#NAME?	#NAME?	#NAME?	#NAME?	#NAME?	#NAME?	#NAME?	#NAME?	#NAME?	#NAME?	#NAME?	#NAME?	#NAME?	#NAME?	#NAME?	#NAME?	#NAME?	#NAME?	#NAME?	#NAME?	#NAME?	#NAME?	#NAME?	#NAME?	#NAME?	#NAME?	#NAME?	#NAME?
	58		2.61764e-05	5.82515e-06	0.000110841	2.67897e-05	0.954687	36470.4	#NAME?	#NAME?	#NAME?	#NAME?	#NAME?	#NAME?	#NAME?	#NAME?	#NAME?	#NAME?	#NAME?	#NAME?	#NAME?	#NAME?	#NAME?	#NAME?	#NAME?	#NAME?	#NAME?	#NAME?	#NAME?	#NAME?	#NAME?	#NAME?	#NAME?	#NAME?	#NAME?	#NAME?	#NAME?	#NAME?	#NAME?	#NAME?	#NAME?
	59		2.204e-05	4.774e-06	9.57838e-05	2.32168e-05	0.90115	40886.2	#NAME?	#NAME?	#NAME?	#NAME?	#NAME?	#NAME?	#NAME?	#NAME?	#NAME?	#NAME?	#NAME?	#NAME?	#NAME?	#NAME?	#NAME?	#NAME?	#NAME?	#NAME?	#NAME?	#NAME?	#NAME?	#NAME?	#NAME?	#NAME?	#NAME?	#NAME?	#NAME?	#NAME?	#NAME?	#NAME?	#NAME?	#NAME?	#NAME?
	60		1.85572e-05	3.91253e-06	8.27723e-05	2.01173e-05	0.850879	45850.9	#NAME?	#NAME?	#NAME?	#NAME?	#NAME?	#NAME?	#NAME?	#NAME?	#NAME?	#NAME?	#NAME?	#NAME?	#NAME?	#NAME?	#NAME?	#NAME?	#NAME?	#NAME?	#NAME?	#NAME?	#NAME?	#NAME?	#NAME?	#NAME?	#NAME?	#NAME?	#NAME?	#NAME?	#NAME?	#NAME?	#NAME?	#NAME?	#NAME?
	61		1.56248e-05	3.20652e-06	7.15283e-05	1.7429e-05	0.803647	51433.3	#NAME?	#NAME?	#NAME?	#NAME?	#NAME?	#NAME?	#NAME?	#NAME?	#NAME?	#NAME?	#NAME?	#NAME?	#NAME?	#NAME?	#NAME?	#NAME?	#NAME?	#NAME?	#NAME?	#NAME?	#NAME?	#NAME?	#NAME?	#NAME?	#NAME?	#NAME?	#NAME?	#NAME?	#NAME?	#NAME?	#NAME?	#NAME?	#NAME?
	62		1.31557e-05	2.6279e-06	6.18118e-05	1.50979e-05	0.759245	57711.4	#NAME?	#NAME?	#NAME?	#NAME?	#NAME?	#NAME?	#NAME?	#NAME?	#NAME?	#NAME?	#NAME?	#NAME?	#NAME?	#NAME?	#NAME?	#NAME?	#NAME?	#NAME?	#NAME?	#NAME?	#NAME?	#NAME?	#NAME?	#NAME?	#NAME?	#NAME?	#NAME?	#NAME?	#NAME?	#NAME?	#NAME?	#NAME?	#NAME?
	63		1.10768e-05	2.15369e-06	5.34151e-05	1.30769e-05	0.717483	64772.5	#NAME?	#NAME?	#NAME?	#NAME?	#NAME?	#NAME?	#NAME?	#NAME?	#NAME?	#NAME?	#NAME?	#NAME?	#NAME?	#NAME?	#NAME?	#NAME?	#NAME?	#NAME?	#NAME?	#NAME?	#NAME?	#NAME?	#NAME?	#NAME?	#NAME?	#NAME?	#NAME?	#NAME?	#NAME?	#NAME?	#NAME?	#NAME?	#NAME?
	64		9.32648e-06	1.76506e-06	4.61591e-05	1.1325e-05	0.678185	72715.5	#NAME?	#NAME?	#NAME?	#NAME?	#NAME?	#NAME?	#NAME?	#NAME?	#NAME?	#NAME?	#NAME?	#NAME?	#NAME?	#NAME?	#NAME?	#NAME?	#NAME?	#NAME?	#NAME?	#NAME?	#NAME?	#NAME?	#NAME?	#NAME?	#NAME?	#NAME?	#NAME?	#NAME?	#NAME?	#NAME?	#NAME?	#NAME?	#NAME?
	65		7.8527e-06	1.44655e-06	3.98887e-05	9.80668e-06	0.641188	81651.3	#NAME?	#NAME?	#NAME?	#NAME?	#NAME?	#NAME?	#NAME?	#NAME?	#NAME?	#NAME?	#NAME?	#NAME?	#NAME?	#NAME?	#NAME?	#NAME?	#NAME?	#NAME?	#NAME?	#NAME?	#NAME?	#NAME?	#NAME?	#NAME?	#NAME?	#NAME?	#NAME?	#NAME?	#NAME?	#NAME?	#NAME?	#NAME?	#NAME?
	66		6.61181e-06	1.18552e-06	3.44701e-05	8.49098e-06	0.606342	91705.3	#NAME?	#NAME?	#NAME?	#NAME?	#NAME?	#NAME?	#NAME?	#NAME?	#NAME?	#NAME?	#NAME?	#NAME?	#NAME?	#NAME?	#NAME?	#NAME?	#NAME?	#NAME?	#NAME?	#NAME?	#NAME?	#NAME?	#NAME?	#NAME?	#NAME?	#NAME?	#NAME?	#NAME?	#NAME?	#NAME?	#NAME?	#NAME?	#NAME?
	67		5.56701e-06	9.71596e-07	2.97876e-05	7.35103e-06	0.573509	103019	#NAME?	#NAME?	#NAME?	#NAME?	#NAME?	#NAME?	#NAME?	#NAME?	#NAME?	#NAME?	#NAME?	#NAME?	#NAME?	#NAME?	#NAME?	#NAME?	#NAME?	#NAME?	#NAME?	#NAME?	#NAME?	#NAME?	#NAME?	#NAME?	#NAME?	#NAME?	#NAME?	#NAME?	#NAME?	#NAME?	#NAME?	#NAME?	#NAME?
	68		4.6873e-06	7.96271e-07	2.57412e-05	6.36351e-06	0.542559	115750	#NAME?	#NAME?	#NAME?	#NAME?	#NAME?	#NAME?	#NAME?	#NAME?	#NAME?	#NAME?	#NAME?	#NAME?	#NAME?	#NAME?	#NAME?	#NAME?	#NAME?	#NAME?	#NAME?	#NAME?	#NAME?	#NAME?	#NAME?	#NAME?	#NAME?	#NAME?	#NAME?	#NAME?	#NAME?	#NAME?	#NAME?	#NAME?	#NAME?
	69		3.94661e-06	6.52584e-07	2.22445e-05	5.50814e-06	0.513375	130079	#NAME?	#NAME?	#NAME?	#NAME?	#NAME?	#NAME?	#NAME?	#NAME?	#NAME?	#NAME?	#NAME?	#NAME?	#NAME?	#NAME?	#NAME?	#NAME?	#NAME?	#NAME?	#NAME?	#NAME?	#NAME?	#NAME?	#NAME?	#NAME?	#NAME?	#NAME?	#NAME?	#NAME?	#NAME?	#NAME?	#NAME?	#NAME?	#NAME?
	70		3.32296e-06	5.34825e-07	1.92227e-05	4.76732e-06	0.485845	146208	#NAME?	#NAME?	#NAME?	#NAME?	#NAME?	#NAME?	#NAME?	#NAME?	#NAME?	#NAME?	#NAME?	#NAME?	#NAME?	#NAME?	#NAME?	#NAME?	#NAME?	#NAME?	#NAME?	#NAME?	#NAME?	#NAME?	#NAME?	#NAME?	#NAME?	#NAME?	#NAME?	#NAME?	#NAME?	#NAME?	#NAME?	#NAME?	#NAME?
	71		2.79787e-06	4.38316e-07	1.66115e-05	4.12581e-06	0.459867	164363	#NAME?	#NAME?	#NAME?	#NAME?	#NAME?	#NAME?	#NAME?	#NAME?	#NAME?	#NAME?	#NAME?	#NAME?	#NAME?	#NAME?	#NAME?	#NAME?	#NAME?	#NAME?	#NAME?	#NAME?	#NAME?	#NAME?	#NAME?	#NAME?	#NAME?	#NAME?	#NAME?	#NAME?	#NAME?	#NAME?	#NAME?	#NAME?	#NAME?
	72		2.35575e-06	3.59222e-07	1.43549e-05	3.57033e-06	0.435347	184802	#NAME?	#NAME?	#NAME?	#NAME?	#NAME?	#NAME?	#NAME?	#NAME?	#NAME?	#NAME?	#NAME?	#NAME?	#NAME?	#NAME?	#NAME?	#NAME?	#NAME?	#NAME?	#NAME?	#NAME?	#NAME?	#NAME?	#NAME?	#NAME?	#NAME?	#NAME?	#NAME?	#NAME?	#NAME?	#NAME?	#NAME?	#NAME?	#NAME?
	73		1.98349e-06	2.944e-07	1.24049e-05	3.08942e-06	0.412195	207813	#NAME?	#NAME?	#NAME?	#NAME?	#NAME?	#NAME?	#NAME?	#NAME?	#NAME?	#NAME?	#NAME?	#NAME?	#NAME?	#NAME?	#NAME?	#NAME?	#NAME?	#NAME?	#NAME?	#NAME?	#NAME?	#NAME?	#NAME?	#NAME?	#NAME?	#NAME?	#NAME?	#NAME?	#NAME?	#NAME?	#NAME?	#NAME?	#NAME?
	74		1.67006e-06	2.41276e-07	1.07198e-05	2.6731e-06	0.390329	233721	#NAME?	#NAME?	#NAME?	#NAME?	#NAME?	#NAME?	#NAME?	#NAME?	#NAME?	#NAME?	#NAME?	#NAME?	#NAME?	#NAME?	#NAME?	#NAME?	#NAME?	#NAME?	#NAME?	#NAME?	#NAME?	#NAME?	#NAME?	#NAME?	#NAME?	#NAME?	#NAME?	#NAME?	#NAME?	#NAME?	#NAME?	#NAME?	#NAME?
	75		1.40615e-06	1.97737e-07	9.26361e-06	2.31272e-06	0.369671	262895	#NAME?	#NAME?	#NAME?	#NAME?	#NAME?	#NAME?	#NAME?	#NAME?	#NAME?	#NAME?	#NAME?	#NAME?	#NAME?	#NAME?	#NAME?	#NAME?	#NAME?	#NAME?	#NAME?	#NAME?	#NAME?	#NAME?	#NAME?	#NAME?	#NAME?	#NAME?	#NAME?	#NAME?	#NAME?	#NAME?	#NAME?	#NAME?	#NAME?
	76		1.18395e-06	1.62056e-07	8.00522e-06	2.00081e-06	0.350151	295747	#NAME?	#NAME?	#NAME?	#NAME?	#NAME?	#NAME?	#NAME?	#NAME?	#NAME?	#NAME?	#NAME?	#NAME?	#NAME?	#NAME?	#NAME?	#NAME?	#NAME?	#NAME?	#NAME?	#NAME?	#NAME?	#NAME?	#NAME?	#NAME?	#NAME?	#NAME?	#NAME?	#NAME?	#NAME?	#NAME?	#NAME?	#NAME?	#NAME?
	77		9.96862e-07	1.32813e-07	6.91777e-06	1.73086e-06	0.331701	332744	#NAME?	#NAME?	#NAME?	#NAME?	#NAME?	#NAME?	#NAME?	#NAME?	#NAME?	#NAME?	#NAME?	#NAME?	#NAME?	#NAME?	#NAME?	#NAME?	#NAME?	#NAME?	#NAME?	#NAME?	#NAME?	#NAME?	#NAME?	#NAME?	#NAME?	#NAME?	#NAME?	#NAME?	#NAME?	#NAME?	#NAME?	#NAME?	#NAME?
	78		8.39337e-07	1.08847e-07	5.97805e-06	1.49724e-06	0.314258	374411	#NAME?	#NAME?	#NAME?	#NAME?	#NAME?	#NAME?	#NAME?	#NAME?	#NAME?	#NAME?	#NAME?	#NAME?	#NAME?	#NAME?	#NAME?	#NAME?	#NAME?	#NAME?	#NAME?	#NAME?	#NAME?	#NAME?	#NAME?	#NAME?	#NAME?	#NAME?	#NAME?	#NAME?	#NAME?	#NAME?	#NAME?	#NAME?	#NAME?
	79		7.06704e-07	8.92053e-08	5.16597e-06	1.29509e-06	0.297764	421341	#NAME?	#NAME?	#NAME?	#NAME?	#NAME?	#NAME?	#NAME?	#NAME?	#NAME?	#NAME?	#NAME?	#NAME?	#NAME?	#NAME?	#NAME?	#NAME?	#NAME?	#NAME?	#NAME?	#NAME?	#NAME?	#NAME?	#NAME?	#NAME?	#NAME?	#NAME?	#NAME?	#NAME?	#NAME?	#NAME?	#NAME?	#NAME?	#NAME?
	80		5.9503e-07	7.31082e-08	4.46422e-06	1.12018e-06	0.282164	474200	#NAME?	#NAME?	#NAME?	#NAME?	#NAME?	#NAME?	#NAME?	#NAME?	#NAME?	#NAME?	#NAME?	#NAME?	#NAME?	#NAME?	#NAME?	#NAME?	#NAME?	#NAME?	#NAME?	#NAME?	#NAME?	#NAME?	#NAME?	#NAME?	#NAME?	#NAME?	#NAME?	#NAME?	#NAME?	#NAME?	#NAME?	#NAME?	#NAME?
	81		5.01003e-07	5.99158e-08	3.85779e-06	9.68845e-07	0.267406	533741	#NAME?	#NAME?	#NAME?	#NAME?	#NAME?	#NAME?	#NAME?	#NAME?	#NAME?	#NAME?	#NAME?	#NAME?	#NAME?	#NAME?	#NAME?	#NAME?	#NAME?	#NAME?	#NAME?	#NAME?	#NAME?	#NAME?	#NAME?	#NAME?	#NAME?	#NAME?	#NAME?	#NAME?	#NAME?	#NAME?	#NAME?	#NAME?	#NAME?
	82		4.21834e-07	4.9104e-08	3.33374e-06	8.37916e-07	0.253444	600813	#NAME?	#NAME?	#NAME?	#NAME?	#NAME?	#NAME?	#NAME?	#NAME?	#NAME?	#NAME?	#NAME?	#NAME?	#NAME?	#NAME?	#NAME?	#NAME?	#NAME?	#NAME?	#NAME?	#NAME?	#NAME?	#NAME?	#NAME?	#NAME?	#NAME?	#NAME?	#NAME?	#NAME?	#NAME?	#NAME?	#NAME?	#NAME?	#NAME?
	83		3.55176e-07	4.02432e-08	2.88087e-06	7.24651e-07	0.240231	676371	#NAME?	#NAME?	#NAME?	#NAME?	#NAME?	#NAME?	#NAME?	#NAME?	#NAME?	#NAME?	#NAME?	#NAME?	#NAME?	#NAME?	#NAME?	#NAME?	#NAME?	#NAME?	#NAME?	#NAME?	#NAME?	#NAME?	#NAME?	#NAME?	#NAME?	#NAME?	#NAME?	#NAME?	#NAME?	#NAME?	#NAME?	#NAME?	#NAME?
	84		2.99051e-07	3.29813e-08	2.48953e-06	6.2667e-07	0.227725	761492	#NAME?	#NAME?	#NAME?	#NAME?	#NAME?	#NAME?	#NAME?	#NAME?	#NAME?	#NAME?	#NAME?	#NAME?	#NAME?	#NAME?	#NAME?	#NAME?	#NAME?	#NAME?	#NAME?	#NAME?	#NAME?	#NAME?	#NAME?	#NAME?	#NAME?	#NAME?	#NAME?	#NAME?	#NAME?	#NAME?	#NAME?	#NAME?	#NAME?
	85		2.51794e-07	2.70298e-08	2.15135e-06	5.41917e-07	0.215886	857391	#NAME?	#NAME?	#NAME?	#NAME?	#NAME?	#NAME?	#NAME?	#NAME?	#NAME?	#NAME?	#NAME?	#NAME?	#NAME?	#NAME?	#NAME?	#NAME?	#NAME?	#NAME?	#NAME?	#NAME?	#NAME?	#NAME?	#NAME?	#NAME?	#NAME?	#NAME?	#NAME?	#NAME?	#NAME?	#NAME?	#NAME?	#NAME?	#NAME?
	86		2.12006e-07	2.21523e-08	1.8591e-06	4.6861e-07	0.204678	965437	#NAME?	#NAME?	#NAME?	#NAME?	#NAME?	#NAME?	#NAME?	#NAME?	#NAME?	#NAME?	#NAME?	#NAME?	#NAME?	#NAME?	#NAME?	#NAME?	#NAME?	#NAME?	#NAME?	#NAME?	#NAME?	#NAME?	#NAME?	#NAME?	#NAME?	#NAME?	#NAME?	#NAME?	#NAME?	#NAME?	#NAME?	#NAME?	#NAME?
	87		1.78504e-07	1.81549e-08	1.60656e-06	4.05205e-07	0.194065	1.08717e+06	#NAME?	#NAME?	#NAME?	#NAME?	#NAME?	#NAME?	#NAME?	#NAME?	#NAME?	#NAME?	#NAME?	#NAME?	#NAME?	#NAME?	#NAME?	#NAME?	#NAME?	#NAME?	#NAME?	#NAME?	#NAME?	#NAME?	#NAME?	#NAME?	#NAME?	#NAME?	#NAME?	#NAME?	#NAME?	#NAME?	#NAME?	#NAME?	#NAME?
	88		1.50297e-07	1.48788e-08	1.38832e-06	3.50367e-07	0.184015	1.22434e+06	#NAME?	#NAME?	#NAME?	#NAME?	#NAME?	#NAME?	#NAME?	#NAME?	#NAME?	#NAME?	#NAME?	#NAME?	#NAME?	#NAME?	#NAME?	#NAME?	#NAME?	#NAME?	#NAME?	#NAME?	#NAME?	#NAME?	#NAME?	#NAME?	#NAME?	#NAME?	#NAME?	#NAME?	#NAME?	#NAME?	#NAME?	#NAME?	#NAME?
	89		1.26547e-07	1.2194e-08	1.19973e-06	3.02942e-07	0.174495	1.3789e+06	#NAME?	#NAME?	#NAME?	#NAME?	#NAME?	#NAME?	#NAME?	#NAME?	#NAME?	#NAME?	#NAME?	#NAME?	#NAME?	#NAME?	#NAME?	#NAME?	#NAME?	#NAME?	#NAME?	#NAME?	#NAME?	#NAME?	#NAME?	#NAME?	#NAME?	#NAME?	#NAME?	#NAME?	#NAME?	#NAME?	#NAME?	#NAME?	#NAME?
	90		1.0655e-07	9.99355e-09	1.03675e-06	2.61928e-07	0.165478	1.55306e+06	#NAME?	#NAME?	#NAME?	#NAME?	#NAME?	#NAME?	#NAME?	#NAME?	#NAME?	#NAME?	#NAME?	#NAME?	#NAME?	#NAME?	#NAME?	#NAME?	#NAME?	#NAME?	#NAME?	#NAME?	#NAME?	#NAME?	#NAME?	#NAME?	#NAME?	#NAME?	#NAME?	#NAME?	#NAME?	#NAME?	#NAME?	#NAME?	#NAME?
	91		8.97127e-08	8.19021e-09	8.95918e-07	2.26461e-07	0.156935	1.74931e+06	#NAME?	#NAME?	#NAME?	#NAME?	#NAME?	#NAME?	#NAME?	#NAME?	#NAME?	#NAME?	#NAME?	#NAME?	#NAME?	#NAME?	#NAME?	#NAME?	#NAME?	#NAME?	#NAME?	#NAME?	#NAME?	#NAME?	#NAME?	#NAME?	#NAME?	#NAME?	#NAME?	#NAME?	#NAME?	#NAME?	#NAME?	#NAME?	#NAME?
	92		7.55362e-08	6.71229e-09	7.74215e-07	1.95791e-07	0.148841	1.97046e+06	#NAME?	#NAME?	#NAME?	#NAME?	#NAME?	#NAME?	#NAME?	#NAME?	#NAME?	#NAME?	#NAME?	#NAME?	#NAME?	#NAME?	#NAME?	#NAME?	#NAME?	#NAME?	#NAME?	#NAME?	#NAME?	#NAME?	#NAME?	#NAME?	#NAME?	#NAME?	#NAME?	#NAME?	#NAME?	#NAME?	#NAME?	#NAME?	#NAME?
	93		6.35999e-08	5.50106e-09	6.69043e-07	1.69271e-07	0.141172	2.21968e+06	#NAME?	#NAME?	#NAME?	#NAME?	#NAME?	#NAME?	#NAME?	#NAME?	#NAME?	#NAME?	#NAME?	#NAME?	#NAME?	#NAME?	#NAME?	#NAME?	#NAME?	#NAME?	#NAME?	#NAME?	#NAME?	#NAME?	#NAME?	#NAME?	#NAME?	#NAME?	#NAME?	#NAME?	#NAME?	#NAME?	#NAME?	#NAME?	#NAME?
	94		5.35498e-08	4.50839e-09	5.78159e-07	1.46339e-07	0.133904	2.50055e+06	#NAME?	#NAME?	#NAME?	#NAME?	#NAME?	#NAME?	#NAME?	#NAME?	#NAME?	#NAME?	#NAME?	#NAME?	#NAME?	#NAME?	#NAME?	#NAME?	#NAME?	#NAME?	#NAME?	#NAME?	#NAME?	#NAME?	#NAME?	#NAME?	#NAME?	#NAME?	#NAME?	#NAME?	#NAME?	#NAME?	#NAME?	#NAME?	#NAME?
	95		4.50878e-08	3.69485e-09	4.99621e-07	1.26512e-07	0.127016	2.81707e+06	#NAME?	#NAME?	#NAME?	#NAME?	#NAME?	#NAME?	#NAME?	#NAME?	#NAME?	#NAME?	#NAME?	#NAME?	#NAME?	#NAME?	#NAME?	#NAME?	#NAME?	#NAME?	#NAME?	#NAME?	#NAME?	#NAME?	#NAME?	#NAME?	#NAME?	#NAME?	#NAME?	#NAME?	#NAME?	#NAME?	#NAME?	#NAME?	#NAME?
	96		3.7963e-08	3.02811e-09	4.31751e-07	1.09368e-07	0.120487	3.1738e+06	#NAME?	#NAME?	#NAME?	#NAME?	#NAME?	#NAME?	#NAME?	#NAME?	#NAME?	#NAME?	#NAME?	#NAME?	#NAME?	#NAME?	#NAME?	#NAME?	#NAME?	#NAME?	#NAME?	#NAME?	#NAME?	#NAME?	#NAME?	#NAME?	#NAME?	#NAME?	#NAME?	#NAME?	#NAME?	#NAME?	#NAME?	#NAME?	#NAME?
	97		3.19641e-08	2.48169e-09	3.73101e-07	9.45457e-08	0.114298	3.57584e+06	#NAME?	#NAME?	#NAME?	#NAME?	#NAME?	#NAME?	#NAME?	#NAME?	#NAME?	#NAME?	#NAME?	#NAME?	#NAME?	#NAME?	#NAME?	#NAME?	#NAME?	#NAME?	#NAME?	#NAME?	#NAME?	#NAME?	#NAME?	#NAME?	#NAME?	#NAME?	#NAME?	#NAME?	#NAME?	#NAME?	#NAME?	#NAME?	#NAME?
	98		2.69131e-08	2.03387e-09	3.22418e-07	8.17307e-08	0.108432	4.02896e+06	#NAME?	#NAME?	#NAME?	#NAME?	#NAME?	#NAME?	#NAME?	#NAME?	#NAME?	#NAME?	#NAME?	#NAME?	#NAME?	#NAME?	#NAME?	#NAME?	#NAME?	#NAME?	#NAME?	#NAME?	#NAME?	#NAME?	#NAME?	#NAME?	#NAME?	#NAME?	#NAME?	#NAME?	#NAME?	#NAME?	#NAME?	#NAME?	#NAME?
	99		2.26603e-08	1.66686e-09	2.7862e-07	7.06513e-08	0.10287	4.53967e+06	#NAME?	#NAME?	#NAME?	#NAME?	#NAME?	#NAME?	#NAME?	#NAME?	#NAME?	#NAME?	#NAME?	#NAME?	#NAME?	#NAME?	#NAME?	#NAME?	#NAME?	#NAME?	#NAME?	#NAME?	#NAME?	#NAME?	#NAME?	#NAME?	#NAME?	#NAME?	#NAME?	#NAME?	#NAME?	#NAME?	#NAME?	#NAME?	#NAME?
	100		1.90795e-08	1.36607e-09	2.40772e-07	6.10729e-08	0.0975969	5.11528e+06	#NAME?	#NAME?	#NAME?	#NAME?	#NAME?	#NAME?	#NAME?	#NAME?	#NAME?	#NAME?	#NAME?	#NAME?	#NAME?	#NAME?	#NAME?	#NAME?	#NAME?	#NAME?	#NAME?	#NAME?	#NAME?	#NAME?	#NAME?	#NAME?	#NAME?	#NAME?	#NAME?	#NAME?	#NAME?	#NAME?	#NAME?	#NAME?	#NAME?
	101		1.60645e-08	1.11956e-09	2.08065e-07	5.27921e-08	0.092597	5.76407e+06	#NAME?	#NAME?	#NAME?	#NAME?	#NAME?	#NAME?	#NAME?	#NAME?	#NAME?	#NAME?	#NAME?	#NAME?	#NAME?	#NAME?	#NAME?	#NAME?	#NAME?	#NAME?	#NAME?	#NAME?	#NAME?	#NAME?	#NAME?	#NAME?	#NAME?	#NAME?	#NAME?	#NAME?	#NAME?	#NAME?	#NAME?	#NAME?	#NAME?
	102		1.3526e-08	9.17539e-10	1.79801e-07	4.56335e-08	0.0878559	6.49534e+06	#NAME?	#NAME?	#NAME?	#NAME?	#NAME?	#NAME?	#NAME?	#NAME?	#NAME?	#NAME?	#NAME?	#NAME?	#NAME?	#NAME?	#NAME?	#NAME?	#NAME?	#NAME?	#NAME?	#NAME?	#NAME?	#NAME?	#NAME?	#NAME?	#NAME?	#NAME?	#NAME?	#NAME?	#NAME?	#NAME?	#NAME?	#NAME?	#NAME?
	103		1.13886e-08	7.51969e-10	1.55376e-07	3.94449e-08	0.08336	7.3196e+06	#NAME?	#NAME?	#NAME?	#NAME?	#NAME?	#NAME?	#NAME?	#NAME?	#NAME?	#NAME?	#NAME?	#NAME?	#NAME?	#NAME?	#NAME?	#NAME?	#NAME?	#NAME?	#NAME?	#NAME?	#NAME?	#NAME?	#NAME?	#NAME?	#NAME?	#NAME?	#NAME?	#NAME?	#NAME?	#NAME?	#NAME?	#NAME?	#NAME?
	104		9.58896e-09	6.16276e-10	1.3427e-07	3.40952e-08	0.0790963	8.24869e+06	#NAME?	#NAME?			0	#NAME?			0	#NAME?			0	#NAME?			0	#NAME?			0	#NAME?			0	#NAME?			0	#NAME?			0
	YLD										#NAME?	#NAME?	#NAME?		#NAME?	#NAME?	#NAME?		#NAME?	#NAME?	#NAME?		#NAME?	#NAME?	#NAME?		#NAME?	#NAME?	#NAME?		#NAME?	#NAME?	#NAME?		#NAME?	#NAME?	#NAME?		#NAME?	#NAME?	#NAME?
PICS
			SCENARIO 2A												SCENARIO 2B												SCENARIO 2C												SCENARIO 2D
			Scenario 2A_V (Vaccinated)						Scenario 2A_U (Unvaccinated)						Scenario 2B (Vaccinated)						Scenario 2B_U (Unvaccinated)						Scenario 2C (Vaccinated)						Scenario 2C_U (Unvaccinated)						Scenario 2D (Vaccinated)						Scenario 2D_U (Unvaccinated)
			COVID INCIDENCE	PICS INCIDENCE	LE tables (Yrs)	Duration (days)	Incidence-per year	DALYS	COVID INCIDENCE	PICS INCIDENCE	LE tables (Yrs)	Duration (days)	Incidence-per year	DALYS	COVID INCIDENCE	PICS INCIDENCE	LE tables (Yrs)	Duration (days)	Incidence-per year	DALYS	COVID INCIDENCE	PICS INCIDENCE	LE tables (Yrs)	Duration (days)	Incidence-per year	DALYS	COVID INCIDENCE	PICS INCIDENCE	LE tables (Yrs)	Duration (days)	Incidence-per year	DALYS	COVID INCIDENCE	PICS INCIDENCE	LE tables (Yrs)	Duration (days)	Incidence-per year	DALYS	COVID INCIDENCE	PICS INCIDENCE	LE tables (Yrs)	Duration (days)	Incidence-per year	DALYS	COVID INCIDENCE	PICS INCIDENCE	LE tables (Yrs)	Duration (days)	Incidence-per year
	60-69		447.522	405.455	21.403	7803.43	8662.39	#NAME?	490.768	444.636	21.403	7803.43	9499.48	#NAME?	118.805	107.637	21.403	7803.43	2299.63	#NAME?	135.083	122.385	21.403	7803.43	2614.71	#NAME?	64.6259	58.551	21.403	7803.43	1250.92	#NAME?	70.9427	64.2741	21.403	7803.43	1373.19	#NAME?	38.1438	34.5583	21.403	7803.43	738.326	#NAME?	42.2741	38.3003	21.403	7803.43	818.272
	70-79		204.89	185.63	13.4485	4898.07	2489.33	#NAME?	224.689	203.568	13.4485	4898.07	2729.88	#NAME?	54.3925	49.2796	13.4485	4898.07	660.848	#NAME?	61.8451	56.0316	13.4485	4898.07	751.394	#NAME?	29.5877	26.8065	13.4485	4898.07	359.48	#NAME?	32.4798	29.4267	13.4485	4898.07	394.617	#NAME?	17.4634	15.8219	13.4485	4898.07	212.174	#NAME?	19.3544	17.5351	13.4485	4898.07	235.148
	80-89		48.5265	43.965	7.10454	2580.93	310.666	#NAME?	53.2158	48.2135	7.10454	2580.93	340.687	#NAME?	12.8824	11.6715	7.10454	2580.93	82.4731	#NAME?	14.6475	13.2706	7.10454	2580.93	93.7731	#NAME?	7.00762	6.34891	7.10454	2580.93	44.8627	#NAME?	7.69258	6.96948	7.10454	2580.93	49.2478	#NAME?	4.13608	3.74729	7.10454	2580.93	26.4791	#NAME?	4.58393	4.15304	7.10454	2580.93	29.3463
	90+		0	0	3.45069	1246.36	0	#NAME?	0	0	3.45069	1246.36	0	#NAME?	0	0	3.45069	1246.36	0	#NAME?	0	0	3.45069	1246.36	0	#NAME?	0	0	3.45069	1246.36	0	#NAME?	0	0	3.45069	1246.36	0	#NAME?	0	0	3.45069	1246.36	0	#NAME?	0	0	3.45069	1246.36	0
	TOTAL		700.938	635.05			11462.4	#NAME?	768.673	696.417			12570	#NAME?	186.08	168.588			3042.95	#NAME?	211.575	191.687			3459.87	#NAME?	101.221	91.7064			1655.26	#NAME?	111.115	100.67			1817.06	#NAME?	59.7434	54.1275			976.979	#NAME?	66.2124	59.9884			1082.77
Permanent
					SCENARIO 2A				SCENARIO 2B				SCENARIO 2C				SCENARIO 2D
					Scenario 2A (Vaccinated)		Scenario 2A (UNVaccinated)		Scenario 2B (Vaccinated)		Scenario 2B (UNVaccinated)		Scenario 2C (Vaccinated)		Scenario 2C (UNVaccinated)		Scenario 2D (Vaccinated)		Scenario 2D (UNVaccinated)
			IHME 2019		COVID-19 consequences		COVID-19 consequences		COVID-19 consequences		COVID-19 consequences		COVID-19 consequences		COVID-19 consequences		COVID-19 consequences		COVID-19 consequences
					Base		Base		Base		Base		Base		Base		Base		Base
			Incidence Base	DALYS Base	Incidence	DALYS	Incidence	DALYS	Incidence	DALYS	Incidence	DALYS	Incidence	DALYS	Incidence	DALYS	Incidence	DALYS	Incidence	DALYS
1	Diabetes	587	69042.8	186528	#NAME?	#NAME?	#NAME?	#NAME?	#NAME?	#NAME?	#NAME?	#NAME?	#NAME?	#NAME?	#NAME?	#NAME?	#NAME?	#NAME?	#NAME?	#NAME?
2	Parkinsons	544	6598.01	38742.5	#NAME?	#NAME?	#NAME?	#NAME?	#NAME?	#NAME?	#NAME?	#NAME?	#NAME?	#NAME?	#NAME?	#NAME?	#NAME?	#NAME?	#NAME?	#NAME?
3	Dementia	543	43968.6	154293	#NAME?	#NAME?	#NAME?	#NAME?	#NAME?	#NAME?	#NAME?	#NAME?	#NAME?	#NAME?	#NAME?	#NAME?	#NAME?	#NAME?	#NAME?	#NAME?
4	Anxiety disorders	571	188750	139108	#NAME?	#NAME?	#NAME?	#NAME?	#NAME?	#NAME?	#NAME?	#NAME?	#NAME?	#NAME?	#NAME?	#NAME?	#NAME?	#NAME?	#NAME?	#NAME?
5	Ischemic Stroke	495	17984.1	114238	#NAME?	#NAME?	#NAME?	#NAME?	#NAME?	#NAME?	#NAME?	#NAME?	#NAME?	#NAME?	#NAME?	#NAME?	#NAME?	#NAME?	#NAME?	#NAME?
	Total with Diabetes					#NAME?		#NAME?		#NAME?		#NAME?		#NAME?		#NAME?		#NAME?		#NAME?
	Total without Diabetes					#NAME?		#NAME?		#NAME?		#NAME?		#NAME?		#NAME?		#NAME?		#NAME?
DALYS
			Scenario 2A_V (Vaccinated)							Scenario 2A_U (Unvaccinated)							Scenario 2B_V (Vaccinated)							Scenario 2B_U (Unvaccinated)							Scenario 2C_V (Vaccinated)							Scenario 2C_U (Unvaccinated)							Scenario 2D_U (Vaccinated)
			TOTAL DALYS				ERRUNOUTPUT			TOTAL DALYS				ERRUNOUTPUT			TOTAL DALYS				ERRUNOUTPUT			TOTAL DALYS				ERRUNOUTPUT			TOTAL DALYS				ERRUNOUTPUT			TOTAL DALYS				ERRUNOUTPUT			TOTAL DALYS				ERRUNOUTPUT
			YLL	YLD (Base)	DALYS	DALYS per 100,000 population				YLL	YLD (Base)	DALYS	DALYS per 100,000 population				YLL	YLD (Base)	DALYS	DALYS per 100,000 population				YLL	YLD (Base)	DALYS	DALYS per 100,000 population				YLL	YLD (Base)	DALYS	DALYS per 100,000 population				YLL	YLD (Base)	DALYS	DALYS per 100,000 population				YLL	YLD (Base)	DALYS	DALYS per 100,000 population
	YLL_2AV_N		30175				#NAME?		YLL_2AU_N	62469.5				#NAME?		YLL_2BV_N	8833.23				#NAME?		YLL_2BU_N	20057.5				#NAME?		YLL_2CV_N	4907.35				#NAME?		YLL_2CU_N	11005				#NAME?		YLL_2DV_N	3017.5				#NAME?
	YLD_Acute_2AV_N			#NAME?			#NAME?		YLD_Acute_2AU_N		#NAME?			#NAME?		YLD_Acute_2BV_N		#NAME?			#NAME?		YLD_Acute_2BU_N		#NAME?			#NAME?		YLD_Acute_2CV_N		#NAME?			#NAME?		YLD_Acute_2CU_N		#NAME?			#NAME?		YLD_Acute_2DV_N		#NAME?			#NAME?
	YLD_Chronic_2AV_N			#NAME?			#NAME?		YLD_Chronic_2AU_N		#NAME?			#NAME?		YLD_Chronic_2BV_N		#NAME?			#NAME?		YLD_Chronic_2BU_N		#NAME?			#NAME?		YLD_Chronic_2CV_N		#NAME?			#NAME?		YLD_Chronic_2CU_N		#NAME?			#NAME?		YLD_Chronic_2DV_N		#NAME?			#NAME?
	YLD_PICS_2AV_N			#NAME?			#NAME?		YLD_PICS_2AU_N		#NAME?			#NAME?		YLD_PICS_2BV_N		#NAME?			#NAME?		YLD_PICS_2BU_N		#NAME?			#NAME?		YLD_PICS_2CV_N		#NAME?			#NAME?		YLD_PICS_2CU_N		#NAME?			#NAME?		YLD_PICS_2DV_N		#NAME?			#NAME?
	DALY_Perm_Diab_2AV_N			#NAME?			#NAME?		DALY_Perm_Diab_2AU_N		#NAME?			#NAME?		DALY_Perm_Diab_2BV_N		#NAME?			#NAME?		DALY_Perm_Diab_2BU_N		#NAME?			#NAME?		DALY_Perm_Diab_2CV_N		#NAME?			#NAME?		DALY_Perm_Diab_2CU_N		#NAME?			#NAME?		DALY_Perm_Diab_2DV_N		#NAME?			#NAME?
	DALY_Perm_WoDiab_2AV_N			#NAME?			#NAME?		DALY_Perm_WoDiab_2AU_N		#NAME?			#NAME?		DALY_Perm_WoDiab_2BV_N		#NAME?			#NAME?		DALY_Perm_WoDiab_2BU_N		#NAME?			#NAME?		DALY_Perm_WoDiab_2CV_N		#NAME?			#NAME?		DALY_Perm_WoDiab_2CU_N		#NAME?			#NAME?		DALY_Perm_WoDiab_2DV_N		#NAME?			#NAME?
	TOTAL YLD Baseline_2AV_N			#NAME?		#NAME?	#NAME?		TOTAL YLD Baseline_2AU_N		#NAME?		#NAME?	#NAME?		TOTAL YLD Baseline_2BV_N		#NAME?		#NAME?	#NAME?		TOTAL YLD Baseline_2BU_N		#NAME?		#NAME?	#NAME?		TOTAL YLD Baseline_2CV_N		#NAME?		#NAME?	#NAME?		TOTAL YLD Baseline_2CU_N		#NAME?		#NAME?	#NAME?		TOTAL YLD Baseline_2DV_N		#NAME?		#NAME?	#NAME?
	TOTAL YLD with Diabetes_2AV_N			#NAME?		#NAME?	#NAME?		TOTAL YLD with Diabetes_2AU_N		#NAME?		#NAME?	#NAME?		TOTAL YLD with Diabetes_2BV_N		#NAME?		#NAME?	#NAME?		TOTAL YLD with Diabetes_2BU_N		#NAME?		#NAME?	#NAME?		TOTAL YLD with Diabetes_2CV_N		#NAME?		#NAME?	#NAME?		TOTAL YLD with Diabetes_2CU_N		#NAME?		#NAME?	#NAME?		TOTAL YLD with Diabetes_2DV_N		#NAME?		#NAME?	#NAME?
	TOTAL YLD without Diabetes_2AV_N			#NAME?		#NAME?	#NAME?		TOTAL YLD without Diabetes_2AU_N		#NAME?		#NAME?	#NAME?		TOTAL YLD without Diabetes_2BV_N		#NAME?		#NAME?	#NAME?		TOTAL YLD without Diabetes_2BU_N		#NAME?		#NAME?	#NAME?		TOTAL YLD without Diabetes_2CV_N		#NAME?		#NAME?	#NAME?		TOTAL YLD without Diabetes_2CU_N		#NAME?		#NAME?	#NAME?		TOTAL YLD without Diabetes_2DV_N		#NAME?		#NAME?	#NAME?
	TOTAL DALYS Baseline_2AV_N				#NAME?	#NAME?	#NAME?		TOTAL DALYS Baseline_2AU_N			#NAME?	#NAME?	#NAME?		TOTAL DALYS Baseline_2BV_N			#NAME?	#NAME?	#NAME?		TOTAL DALYS Baseline_2BU_N			#NAME?	#NAME?	#NAME?		TOTAL DALYS Baseline_2CV_N			#NAME?	#NAME?	#NAME?		TOTAL DALYS Baseline_2CU_N			#NAME?	#NAME?	#NAME?		TOTAL DALYS Baseline_2DV_N			#NAME?	#NAME?	#NAME?
	Total DALY_D_2AV_N				#NAME?	#NAME?	#NAME?		Total DALY_D_2AU_N			#NAME?	#NAME?	#NAME?		Total DALY_D_2BV_N			#NAME?	#NAME?	#NAME?		Total DALY_D_2BU_N			#NAME?	#NAME?	#NAME?		Total DALY_D_2CV_N			#NAME?	#NAME?	#NAME?		Total DALY_D_2CU_N			#NAME?	#NAME?	#NAME?		Total DALY_D_2DV_N			#NAME?	#NAME?	#NAME?
	Total DALYS_WoD_2AV_N				#NAME?	#NAME?	#NAME?		Total DALYS_WoD_2AU_N			#NAME?	#NAME?	#NAME?		Total DALYS_WoD_2BV_N			#NAME?	#NAME?	#NAME?		Total DALYS_WoD_2BU_N			#NAME?	#NAME?	#NAME?		Total DALYS_WoD_2CV_N			#NAME?	#NAME?	#NAME?		Total DALYS_WoD_2CU_N			#NAME?	#NAME?	#NAME?		Total DALYS_WoD_2DV_N			#NAME?	#NAME?	#NAME?
			Scenario 2A_Combined													Scenario 2B_Combined														Scenario 2C_Combined														Scenario 2D_Combined
			TOTAL DALYS				ERRUNOUTPUT										TOTAL DALYS				ERRUNOUTPUT										TOTAL DALYS				ERRUNOUTPUT										TOTAL DALYS				ERRUNOUTPUT
			YLL	YLD (Base)	DALYS	DALYS per 100,000 population											YLL	YLD (Base)	DALYS	DALYS per 100,000 population											YLL	YLD (Base)	DALYS	DALYS per 100,000 population											YLL	YLD (Base)	DALYS	DALYS per 100,000 population
	YLL_2A_Combined_NSW		#NAME?				#NAME?									YLL_2B_Combined_NSW	#NAME?				#NAME?									YLL_2C_Combined_NSW	#NAME?				#NAME?									YLL_2D_Combined_NSW	#NAME?				#NAME?
	YLD_Acute_2A_Combined_NSW			#NAME?			#NAME?									YLD_Acute_2B_Combined_NSW		#NAME?			#NAME?									YLD_Acute_2C_Combined_NSW		#NAME?			#NAME?									YLD_Acute_2D_Combined_NSW		#NAME?			#NAME?
	YLD_Chronic_2A_Combined_NSW			#NAME?			#NAME?									YLD_Chronic_2B_Combined_NSW		#NAME?			#NAME?									YLD_Chronic_2C_Combined_NSW		#NAME?			#NAME?									YLD_Chronic_2D_Combined_NSW		#NAME?			#NAME?
	YLD_PICS_2A_Combined_NSW			#NAME?			#NAME?									YLD_PICS_2B_Combined_NSW		#NAME?			#NAME?									YLD_PICS_2C_Combined_NSW		#NAME?			#NAME?									YLD_PICS_2D_Combined_NSW		#NAME?			#NAME?
	DALY_Perm_Diab_2A_Combined_NSW			#NAME?			#NAME?									DALY_Perm_Diab_2B_Combined_NSW		#NAME?			#NAME?									DALY_Perm_Diab_2C_Combined_NSW		#NAME?			#NAME?									DALY_Perm_Diab_2D_Combined_NSW		#NAME?			#NAME?
	DALY_Perm_WoDiab_2A_Combined_NSW			#NAME?			#NAME?									DALY_Perm_WoDiab_2B_Combined_NSW		#NAME?			#NAME?									DALY_Perm_WoDiab_2C_Combined_NSW		#NAME?			#NAME?									DALY_Perm_WoDiab_2D_Combined_NSW		#NAME?			#NAME?
	TOTAL YLD Baseline_2A_Combined_NSW			#NAME?		#NAME?	#NAME?									TOTAL YLD Baseline_2B_Combined_NSW		#NAME?		#NAME?	#NAME?									TOTAL YLD Baseline_2C_Combined_NSW		#NAME?		#NAME?	#NAME?									TOTAL YLD Baseline_2D_Combined_NSW		#NAME?		#NAME?	#NAME?
	TOTAL YLD with Diabetes_2A_Combined_NSW			#NAME?		#NAME?	#NAME?									TOTAL YLD with Diabetes_2B_Combined_NSW		#NAME?		#NAME?	#NAME?									TOTAL YLD with Diabetes_2C_Combined_NSW		#NAME?		#NAME?	#NAME?									TOTAL YLD with Diabetes_2D_Combined_NSW		#NAME?		#NAME?	#NAME?
	TOTAL YLD without Diabetes_2A_Combined_NSW			#NAME?		#NAME?	#NAME?									TOTAL YLD without Diabetes_2B_Combined_NSW		#NAME?		#NAME?	#NAME?									TOTAL YLD without Diabetes_2C_Combined_NSW		#NAME?		#NAME?	#NAME?									TOTAL YLD without Diabetes_2D_Combined_NSW		#NAME?		#NAME?	#NAME?
	TOTAL DALYS Baseline_2A_Combined_NSW				#NAME?	#NAME?	#NAME?									TOTAL DALYS Baseline_2B_Combined_NSW			#NAME?	#NAME?	#NAME?									TOTAL DALYS Baseline_2C_Combined_NSW			#NAME?	#NAME?	#NAME?									TOTAL DALYS Baseline_2D_Combined_NSW			#NAME?	#NAME?	#NAME?
	Total DALY_D_2A_Combined_NSW				#NAME?	#NAME?	#NAME?									Total DALY_D_2B_Combined_NSW			#NAME?	#NAME?	#NAME?									Total DALY_D_2C_Combined_NSW			#NAME?	#NAME?	#NAME?									Total DALY_D_2D_Combined_NSW			#NAME?	#NAME?	#NAME?
	Total DALYS_WoD_2A_Combined_NSW				#NAME?	#NAME?	#NAME?									Total DALYS_WoD_2B_Combined_NSW			#NAME?	#NAME?	#NAME?									Total DALYS_WoD_2C_Combined_NSW			#NAME?	#NAME?	#NAME?									Total DALYS_WoD_2D_Combined_NSW			#NAME?	#NAME?	#NAME?
[truncated: 1 more columns]

## Sheet: Scenario 3 NSW
DALYS Calculation (Scenario 3: 80% and low, medium or high seeding infections assuming baseline PHSMs and partial TTIQ)
Back to "read me"
Mortality (YLL)
				DEATH						YLL
	Age	Mid	LETotals	Scenario 3A_V (Vaccinated)	Scenario 3A_U (Unvaccinated)	Scenario 3B_V (Vaccinated)	Scenario 3B_U (Unvaccinated)	Scenario 3C_V (Vaccinated)	Scenario 3C_U (Unvaccinated)	Scenario 3A_V (Vaccinated)	Scenario 3A_U (Unvaccinated)	Scenario 3B_V (Vaccinated)	Scenario 3B_U (Unvaccinated)	Scenario 3C_V (Vaccinated)	Scenario 3C_U (Unvaccinated)
	0-9	5	78.2138	0	0	0	0	0	0	0	0	0	0	0	0
	10-19	15	68.2659	1.0153	2.12777	1.59755	3.30069	1.74981	3.39097	69.3105	145.254	109.058	225.324	119.452	231.488
	20-29	25	58.5115	7.10712	14.8944	11.1829	23.1048	12.2487	23.7368	415.848	871.495	654.327	1351.9	716.688	1388.88
	30-39	35	48.8546	9.13772	19.15	14.378	29.7062	15.7483	30.5187	446.419	935.563	702.429	1451.28	769.375	1490.98
	40-49	45	39.3018	21.3213	44.6832	33.5486	69.3145	36.746	71.2104	837.966	1756.13	1318.52	2724.18	1444.18	2798.69
	50-59	55	30.0933	55.8416	117.028	87.8653	181.538	96.2395	186.503	1680.46	3521.74	2644.16	5463.07	2896.16	5612.5
	60-69	65	21.403	95.4384	200.011	150.17	310.265	164.482	318.751	2042.66	4280.82	3214.08	6640.58	3520.4	6822.22
	70-79	75	13.4485	255.856	536.199	402.583	831.774	440.952	854.525	3440.88	7211.07	5414.14	11186.1	5930.14	11492.1
	80-89	85	7.10454	514.758	1078.78	809.959	1673.45	887.153	1719.22	3657.12	7664.24	5754.38	11889.1	6302.81	12214.3
	90-100	95	3.45069	366.524	768.126	576.716	1191.55	631.681	1224.14	1264.76	2650.56	1990.07	4111.66	2179.73	4224.12
	weighted mean/Total			1327	2781	2088	4314	2287	4432	13855.4	29036.9	21801.2	45043.2	23878.9	46275.2
Morbidity (YLD)
PARAMETERS
AUSTALIAN POPULATION			Scenario 3A_V (Vaccinated)	Scenario 3A_U (Unvaccinated)	Scenario 3B_V (Vaccinated)	Scenario 3B_U (Unvaccinated)	Scenario 3C_V (Vaccinated)	Scenario 3C_U (Unvaccinated)		ACUTE	Scenario 3A_V (Vaccinated)	Scenario 3A_U (Unvaccinated)	Scenario 3B_V (Vaccinated)	Scenario 3B_U (Unvaccinated)	Scenario 3C_V (Vaccinated)	Scenario 3C_U (Unvaccinated)		PICS:ICU Survival	Scenario 3A_V (Vaccinated)	Scenario 3A_U (Unvaccinated)	Scenario 3B_V (Vaccinated)	Scenario 3B_U (Unvaccinated)	Scenario 3C_V (Vaccinated)	Scenario 3C_U (Unvaccinated)
Australian COVID case (without death)			113940	629681	147707	760248	162025	799410		Moderate	106334	609981	137237	734187	150509	770708		60-69	165.938	183.674	296.161	327.26	349.368	382.167
Australian poulation as of 31Dec2020 (e)			25694393	25694393	25694393	25694393	25694393	25694393		Severe	7576	19480	10117	25205	10907	27067		70-79	75.9715	84.0915	135.592	149.83	159.952	174.968
Australian COVID case with deaths			115267	632462	149795	764562	164312	803842		Critical	1357	3001	2441	5170	2896	6067		80-89	17.9933	19.9164	32.1139	35.486	37.8833	41.4398
Ausrtalian COVID cases (>10 and above)			113940	340914	147707	417260	162025	445354										90+	0	0	0	0	0	0
Australian COVID cases (Hosp without death; >30 years old)			87864.4	134325	113498	166919	123227	180517										Totals	259.903	287.681	463.867	512.575	547.204	598.575
YEAR			365.25
DISABILITY WEIGHTS (g)			MID	LL	UL	sigma	alpha1	alpha2	ERSATZ
DW(Moderate)			0.051	0.032	0.074	0.0107143	21.4511	399.158	#NAME?
DW(Severe)			0.133	0.088	0.19	0.0260204	22.5184	146.793	#NAME?
DW(Critical)			0.655	0.579	0.727	0.0377551	103.182	54.3476	#NAME?
DW(Chronic)			0.219	0.148	0.308	0.0408163	22.2649	79.4013	#NAME?
DW(Afib as proxy for PICS) (i)			0.224	0.151	0.312	0.0410714	22.8582	79.1875	#NAME?
SEVERITY DISTRIBUTION
ACUTE (Proportion)			%	Duration (days)
N Asymptomatic (will not be added in the YLD) (h)			NA	14
N(Moderate) (a)			NA	14
N(Severe) (a)			NA	14
N(Critical)* (a)			NA	14
CHRONIC			%	Duration (days)		OR	95%CI LL	95%CI UL	RR	LL	UL	SE	ERSATZ
Post (acute) after symptomatic duration to 2 years			See ONS Post-Acute Sheet		Treatment effect of full dose of COVID vaccine	0.51	0.32	0.82	0.540174	0.346891	0.837179	0.0923705	#NAME?
Post-intesive care syndrome			%	Duration (days)
1) PICS			0.906	RLE
Permanent functional impairment			%	LL	UL		Duration	sigma	alpha1	alpha2	ERSATZ
2) Diabetes			0.0282921	0.0256649	0.0312028		RLE	0.00141273	389.685	13384	#NAME?
3) Parkinsons			0.0011	0.00079	0.0014		RLE	0.000155612	49.9126	45325.2	#NAME?
4) Dementia			0.0067	0.0059	0.0075		RLE	0.000408163	267.64	39678.7	#NAME?
5) Anxiety Disorders			0.0711	0.0682	0.0741		RLE	0.0015051	2072.82	27080.8	#NAME?
5) Ischaemic Stroke			0.0076	0.0068	0.0085		RLE	0.000433673	304.774	39797	#NAME?
ACUTE
Morbidity calculation (Total incidence cases/Checking/Scenario analysis)
			Scenario 3A						Scenario 3B						Scenario 3C
			Scenario 3A_V (Vaccinated)			Scenario 3A_U (Unvaccinated)			Scenario 3B_V (Vaccinated)			Scenario 3B_U (Unvaccinated)			Scenario 3C_V (Vaccinated)			Scenario 3C_U (Unvaccinated)
				Case (Person - years)	YLD		Case (Person - years)	YLD		Case (Person - years)	YLD		Case (Person - years)	YLD		Case (Person - years)	YLD		Case (Person - years)	YLD
			Base	Base	Base DL	Base	Base	Base DL	Base	Base	Base DL	Base	Base	Base DL	Base	Base	Base DL	Base	Base	Base DL
	Moderate		106334	4075.77	#NAME?	609981	23380.5	#NAME?	137237	5260.28	#NAME?	734187	28141.3	#NAME?	150509	5769	#NAME?	770708	29541.2	#NAME?
	Severe		7576	290.387	#NAME?	19480	746.667	#NAME?	10117	387.784	#NAME?	25205	966.105	#NAME?	10907	418.064	#NAME?	27067	1037.48	#NAME?
	Critical		1357	52.0137	#NAME?	3001	115.028	#NAME?	2441	93.5633	#NAME?	5170	198.166	#NAME?	2896	111.003	#NAME?	6067	232.548	#NAME?
	TOTAL				#NAME?			#NAME?			#NAME?			#NAME?			#NAME?			#NAME?
CHRONIC/LONG COVID
										SCENARIO 3A								SCENARIO 3B								SCENARIO 3C
			NSW			ERSATZ				Scenario 3A_V (Vaccinated)				Scenario 3A_U (Unvaccinated)				Scenario 3B_V (Vaccinated)				Scenario 3B_U (Unvaccinated)				Scenario 3C_V (Vaccinated)				Scenario 3C_U (Unvaccinated)
	weeks		Baseline	LL	UL	sigma	alpha1	alpha2	Ersazt	Recalculation (mutually exclusive)	Incidence	DALYs/year	DALYS per 100,000	Recalculation (mutually exclusive)	Incidence	DALYs/year	DALYS per 100,000	Recalculation (mutually exclusive)	Incidence	DALYs/year	DALYS per 100,000	Recalculation (mutually exclusive)	Incidence	DALYs/year	DALYS per 100,000	Recalculation (mutually exclusive)	Incidence	DALYs/year	DALYS per 100,000	Recalculation (mutually exclusive)	Incidence	DALYs/year	DALYS per 100,000
	0		0.5629	0.5997	0.5276	-0.0183929	408.834	317.466	#NAME?	#NAME?	#NAME?	#NAME?	#NAME?	#NAME?	#NAME?	#NAME?	#NAME?	#NAME?	#NAME?	#NAME?	#NAME?	#NAME?	#NAME?	#NAME?	#NAME?	#NAME?	#NAME?	#NAME?	#NAME?	#NAME?	#NAME?	#NAME?	#NAME?
	1		0.47395	0.491484	0.45593	-0.00907002	1435.93	1593.77	#NAME?	#NAME?	#NAME?	#NAME?	#NAME?	#NAME?	#NAME?	#NAME?	#NAME?	#NAME?	#NAME?	#NAME?	#NAME?	#NAME?	#NAME?	#NAME?	#NAME?	#NAME?	#NAME?	#NAME?	#NAME?	#NAME?	#NAME?	#NAME?	#NAME?
	2		0.399056	0.402796	0.393995	-0.00224506	18986.1	28591.5	#NAME?	#NAME?	#NAME?	#NAME?	#NAME?	#NAME?	#NAME?	#NAME?	#NAME?	#NAME?	#NAME?	#NAME?	#NAME?	#NAME?	#NAME?	#NAME?	#NAME?	#NAME?	#NAME?	#NAME?	#NAME?	#NAME?	#NAME?	#NAME?	#NAME?
	3		0.335997	0.330111	0.340474	0.00264354	10726.4	21197.7	#NAME?	#NAME?	#NAME?	#NAME?	#NAME?	#NAME?	#NAME?	#NAME?	#NAME?	#NAME?	#NAME?	#NAME?	#NAME?	#NAME?	#NAME?	#NAME?	#NAME?	#NAME?	#NAME?	#NAME?	#NAME?	#NAME?	#NAME?	#NAME?	#NAME?
	4		0.282902	0.270543	0.294223	0.00604095	1572.4	3985.69	#NAME?	#NAME?	#NAME?	#NAME?	#NAME?	#NAME?	#NAME?	#NAME?	#NAME?	#NAME?	#NAME?	#NAME?	#NAME?	#NAME?	#NAME?	#NAME?	#NAME?	#NAME?	#NAME?	#NAME?	#NAME?	#NAME?	#NAME?	#NAME?	#NAME?
	5		0.238198	0.221723	0.254255	0.00829899	627.34	2006.35	#NAME?	#NAME?	#NAME?	#NAME?	#NAME?	#NAME?	#NAME?	#NAME?	#NAME?	#NAME?	#NAME?	#NAME?	#NAME?	#NAME?	#NAME?	#NAME?	#NAME?	#NAME?	#NAME?	#NAME?	#NAME?	#NAME?	#NAME?	#NAME?	#NAME?
	6		0.200558	0.181713	0.219717	0.00969474	341.931	1362.97	#NAME?	#NAME?	#NAME?	#NAME?	#NAME?	#NAME?	#NAME?	#NAME?	#NAME?	#NAME?	#NAME?	#NAME?	#NAME?	#NAME?	#NAME?	#NAME?	#NAME?	#NAME?	#NAME?	#NAME?	#NAME?	#NAME?	#NAME?	#NAME?	#NAME?
	7		0.168865	0.148923	0.18987	0.0104456	217.044	1068.26	#NAME?	#NAME?	#NAME?	#NAME?	#NAME?	#NAME?	#NAME?	#NAME?	#NAME?	#NAME?	#NAME?	#NAME?	#NAME?	#NAME?	#NAME?	#NAME?	#NAME?	#NAME?	#NAME?	#NAME?	#NAME?	#NAME?	#NAME?	#NAME?	#NAME?
	8		0.142181	0.12205	0.164077	0.0107213	150.721	909.342	#NAME?	#NAME?	#NAME?	#NAME?	#NAME?	#NAME?	#NAME?	#NAME?	#NAME?	#NAME?	#NAME?	#NAME?	#NAME?	#NAME?	#NAME?	#NAME?	#NAME?	#NAME?	#NAME?	#NAME?	#NAME?	#NAME?	#NAME?	#NAME?	#NAME?
	9		0.119714	0.100026	0.141789	0.0106538	111.029	816.424	#NAME?	#NAME?	#NAME?	#NAME?	#NAME?	#NAME?	#NAME?	#NAME?	#NAME?	#NAME?	#NAME?	#NAME?	#NAME?	#NAME?	#NAME?	#NAME?	#NAME?	#NAME?	#NAME?	#NAME?	#NAME?	#NAME?	#NAME?	#NAME?	#NAME?
	10		0.100796	0.0819762	0.122528	0.0103448	85.2688	760.683	#NAME?	#NAME?	#NAME?	#NAME?	#NAME?	#NAME?	#NAME?	#NAME?	#NAME?	#NAME?	#NAME?	#NAME?	#NAME?	#NAME?	#NAME?	#NAME?	#NAME?	#NAME?	#NAME?	#NAME?	#NAME?	#NAME?	#NAME?	#NAME?	#NAME?
	11		0.0848684	0.0671836	0.105883	0.00987239	67.5438	728.322	#NAME?	#NAME?	#NAME?	#NAME?	#NAME?	#NAME?	#NAME?	#NAME?	#NAME?	#NAME?	#NAME?	#NAME?	#NAME?	#NAME?	#NAME?	#NAME?	#NAME?	#NAME?	#NAME?	#NAME?	#NAME?	#NAME?	#NAME?	#NAME?	#NAME?
	12		0.0714574	0.0550603	0.0914999	0.00929582	54.7968	712.049	#NAME?	#NAME?	#NAME?	#NAME?	#NAME?	#NAME?	#NAME?	#NAME?	#NAME?	#NAME?	#NAME?	#NAME?	#NAME?	#NAME?	#NAME?	#NAME?	#NAME?	#NAME?	#NAME?	#NAME?	#NAME?	#NAME?	#NAME?	#NAME?	#NAME?
	13		0.0601657	0.0451247	0.0790704	0.00865962	45.308	707.747	#NAME?	#NAME?	#NAME?	#NAME?	#NAME?	#NAME?	#NAME?	#NAME?	#NAME?	#NAME?	#NAME?	#NAME?	#NAME?	#NAME?	#NAME?	#NAME?	#NAME?	#NAME?	#NAME?	#NAME?	#NAME?	#NAME?	#NAME?	#NAME?	#NAME?
	14		0.0506582	0.0369819	0.0683293	0.00799677	38.0466	712.997	#NAME?	#NAME?	#NAME?	#NAME?	#NAME?	#NAME?	#NAME?	#NAME?	#NAME?	#NAME?	#NAME?	#NAME?	#NAME?	#NAME?	#NAME?	#NAME?	#NAME?	#NAME?	#NAME?	#NAME?	#NAME?	#NAME?	#NAME?	#NAME?	#NAME?
	15		0.0426532	0.0303085	0.0590473	0.00733131	32.3621	726.365	#NAME?	#NAME?	#NAME?	#NAME?	#NAME?	#NAME?	#NAME?	#NAME?	#NAME?	#NAME?	#NAME?	#NAME?	#NAME?	#NAME?	#NAME?	#NAME?	#NAME?	#NAME?	#NAME?	#NAME?	#NAME?	#NAME?	#NAME?	#NAME?	#NAME?
	16		0.0359131	0.0248394	0.0510262	0.00668031	27.8272	747.02	#NAME?	#NAME?	#NAME?	#NAME?	#NAME?	#NAME?	#NAME?	#NAME?	#NAME?	#NAME?	#NAME?	#NAME?	#NAME?	#NAME?	#NAME?	#NAME?	#NAME?	#NAME?	#NAME?	#NAME?	#NAME?	#NAME?	#NAME?	#NAME?	#NAME?
	17		0.0302381	0.0203571	0.0440946	0.0060555	24.1507	774.535	#NAME?	#NAME?	#NAME?	#NAME?	#NAME?	#NAME?	#NAME?	#NAME?	#NAME?	#NAME?	#NAME?	#NAME?	#NAME?	#NAME?	#NAME?	#NAME?	#NAME?	#NAME?	#NAME?	#NAME?	#NAME?	#NAME?	#NAME?	#NAME?	#NAME?
	18		0.0254598	0.0166837	0.0381047	0.00546456	21.1289	808.764	#NAME?	#NAME?	#NAME?	#NAME?	#NAME?	#NAME?	#NAME?	#NAME?	#NAME?	#NAME?	#NAME?	#NAME?	#NAME?	#NAME?	#NAME?	#NAME?	#NAME?	#NAME?	#NAME?	#NAME?	#NAME?	#NAME?	#NAME?	#NAME?	#NAME?
	19		0.0214366	0.0136731	0.0329285	0.00491209	18.6153	849.77	#NAME?	#NAME?	#NAME?	#NAME?	#NAME?	#NAME?	#NAME?	#NAME?	#NAME?	#NAME?	#NAME?	#NAME?	#NAME?	#NAME?	#NAME?	#NAME?	#NAME?	#NAME?	#NAME?	#NAME?	#NAME?	#NAME?	#NAME?	#NAME?	#NAME?
`	20		0.0180492	0.0112058	0.0284554	0.00440042	16.5023	897.791	#NAME?	#NAME?	#NAME?	#NAME?	#NAME?	#NAME?	#NAME?	#NAME?	#NAME?	#NAME?	#NAME?	#NAME?	#NAME?	#NAME?	#NAME?	#NAME?	#NAME?	#NAME?	#NAME?	#NAME?	#NAME?	#NAME?	#NAME?	#NAME?	#NAME?
	21		0.0151971	0.00918369	0.02459	0.00393017	14.7095	953.206	#NAME?	#NAME?	#NAME?	#NAME?	#NAME?	#NAME?	#NAME?	#NAME?	#NAME?	#NAME?	#NAME?	#NAME?	#NAME?	#NAME?	#NAME?	#NAME?	#NAME?	#NAME?	#NAME?	#NAME?	#NAME?	#NAME?	#NAME?	#NAME?	#NAME?
	22		0.0127956	0.0075265	0.0212496	0.00350079	13.1757	1016.53	#NAME?	#NAME?	#NAME?	#NAME?	#NAME?	#NAME?	#NAME?	#NAME?	#NAME?	#NAME?	#NAME?	#NAME?	#NAME?	#NAME?	#NAME?	#NAME?	#NAME?	#NAME?	#NAME?	#NAME?	#NAME?	#NAME?	#NAME?	#NAME?	#NAME?
	23		0.0107736	0.00616834	0.018363	0.00311089	11.8538	1088.41	#NAME?	#NAME?	#NAME?	#NAME?	#NAME?	#NAME?	#NAME?	#NAME?	#NAME?	#NAME?	#NAME?	#NAME?	#NAME?	#NAME?	#NAME?	#NAME?	#NAME?	#NAME?	#NAME?	#NAME?	#NAME?	#NAME?	#NAME?	#NAME?	#NAME?
	24		0.00907118	0.00505526	0.0158685	0.00275849	10.7068	1169.6	#NAME?	#NAME?	#NAME?	#NAME?	#NAME?	#NAME?	#NAME?	#NAME?	#NAME?	#NAME?	#NAME?	#NAME?	#NAME?	#NAME?	#NAME?	#NAME?	#NAME?	#NAME?	#NAME?	#NAME?	#NAME?	#NAME?	#NAME?	#NAME?	#NAME?
	25		0.00763774	0.00414304	0.0137129	0.0024413	9.70549	1261.02	#NAME?	#NAME?	#NAME?	#NAME?	#NAME?	#NAME?	#NAME?	#NAME?	#NAME?	#NAME?	#NAME?	#NAME?	#NAME?	#NAME?	#NAME?	#NAME?	#NAME?	#NAME?	#NAME?	#NAME?	#NAME?	#NAME?	#NAME?	#NAME?	#NAME?
	26		0.00643082	0.00339543	0.0118501	0.00215681	8.82654	1363.71	#NAME?	#NAME?	#NAME?	#NAME?	#NAME?	#NAME?	#NAME?	#NAME?	#NAME?	#NAME?	#NAME?	#NAME?	#NAME?	#NAME?	#NAME?	#NAME?	#NAME?	#NAME?	#NAME?	#NAME?	#NAME?	#NAME?	#NAME?	#NAME?	#NAME?
	27		0.00541462	0.00278272	0.0102404	0.00190246	8.05106	1478.86	#NAME?	#NAME?	#NAME?	#NAME?	#NAME?	#NAME?	#NAME?	#NAME?	#NAME?	#NAME?	#NAME?	#NAME?	#NAME?	#NAME?	#NAME?	#NAME?	#NAME?	#NAME?	#NAME?	#NAME?	#NAME?	#NAME?	#NAME?	#NAME?	#NAME?
	28		0.00455899	0.00228058	0.0088493	0.00167569	7.36369	1607.84	#NAME?	#NAME?	#NAME?	#NAME?	#NAME?	#NAME?	#NAME?	#NAME?	#NAME?	#NAME?	#NAME?	#NAME?	#NAME?	#NAME?	#NAME?	#NAME?	#NAME?	#NAME?	#NAME?	#NAME?	#NAME?	#NAME?	#NAME?	#NAME?	#NAME?
	29		0.00383858	0.00186905	0.00764719	0.00147402	6.75179	1752.18	#NAME?	#NAME?	#NAME?	#NAME?	#NAME?	#NAME?	#NAME?	#NAME?	#NAME?	#NAME?	#NAME?	#NAME?	#NAME?	#NAME?	#NAME?	#NAME?	#NAME?	#NAME?	#NAME?	#NAME?	#NAME?	#NAME?	#NAME?	#NAME?	#NAME?
	30		0.003232	0.00153178	0.00660838	0.00129505	6.20494	1913.64	#NAME?	#NAME?	#NAME?	#NAME?	#NAME?	#NAME?	#NAME?	#NAME?	#NAME?	#NAME?	#NAME?	#NAME?	#NAME?	#NAME?	#NAME?	#NAME?	#NAME?	#NAME?	#NAME?	#NAME?	#NAME?	#NAME?	#NAME?	#NAME?	#NAME?
	31		0.00272128	0.00125537	0.00571068	0.00113656	5.71441	2094.19	#NAME?	#NAME?	#NAME?	#NAME?	#NAME?	#NAME?	#NAME?	#NAME?	#NAME?	#NAME?	#NAME?	#NAME?	#NAME?	#NAME?	#NAME?	#NAME?	#NAME?	#NAME?	#NAME?	#NAME?	#NAME?	#NAME?	#NAME?	#NAME?	#NAME?
	32		0.00229126	0.00102884	0.00493493	0.000996452	5.27292	2296.05	#NAME?	#NAME?	#NAME?	#NAME?	#NAME?	#NAME?	#NAME?	#NAME?	#NAME?	#NAME?	#NAME?	#NAME?	#NAME?	#NAME?	#NAME?	#NAME?	#NAME?	#NAME?	#NAME?	#NAME?	#NAME?	#NAME?	#NAME?	#NAME?	#NAME?
	33		0.00192919	0.000843184	0.00426456	0.000872799	4.8743	2521.72	#NAME?	#NAME?	#NAME?	#NAME?	#NAME?	#NAME?	#NAME?	#NAME?	#NAME?	#NAME?	#NAME?	#NAME?	#NAME?	#NAME?	#NAME?	#NAME?	#NAME?	#NAME?	#NAME?	#NAME?	#NAME?	#NAME?	#NAME?	#NAME?	#NAME?
	34		0.00162434	0.000691031	0.00368525	0.000763831	4.51333	2774.05	#NAME?	#NAME?	#NAME?	#NAME?	#NAME?	#NAME?	#NAME?	#NAME?	#NAME?	#NAME?	#NAME?	#NAME?	#NAME?	#NAME?	#NAME?	#NAME?	#NAME?	#NAME?	#NAME?	#NAME?	#NAME?	#NAME?	#NAME?	#NAME?	#NAME?
	35		0.00136766	0.000566334	0.00318464	0.000667934	4.18555	3056.19	#NAME?	#NAME?	#NAME?	#NAME?	#NAME?	#NAME?	#NAME?	#NAME?	#NAME?	#NAME?	#NAME?	#NAME?	#NAME?	#NAME?	#NAME?	#NAME?	#NAME?	#NAME?	#NAME?	#NAME?	#NAME?	#NAME?	#NAME?	#NAME?	#NAME?
	36		0.00115154	0.000464139	0.00275203	0.000583645	3.88716	3371.73	#NAME?	#NAME?	#NAME?	#NAME?	#NAME?	#NAME?	#NAME?	#NAME?	#NAME?	#NAME?	#NAME?	#NAME?	#NAME?	#NAME?	#NAME?	#NAME?	#NAME?	#NAME?	#NAME?	#NAME?	#NAME?	#NAME?	#NAME?	#NAME?	#NAME?
	37		0.000969574	0.000380385	0.00237819	0.000509643	3.61486	3724.68	#NAME?	#NAME?	#NAME?	#NAME?	#NAME?	#NAME?	#NAME?	#NAME?	#NAME?	#NAME?	#NAME?	#NAME?	#NAME?	#NAME?	#NAME?	#NAME?	#NAME?	#NAME?	#NAME?	#NAME?	#NAME?	#NAME?	#NAME?	#NAME?	#NAME?
	38		0.000816361	0.000311745	0.00205513	0.000444741	3.36582	4119.59	#NAME?	#NAME?	#NAME?	#NAME?	#NAME?	#NAME?	#NAME?	#NAME?	#NAME?	#NAME?	#NAME?	#NAME?	#NAME?	#NAME?	#NAME?	#NAME?	#NAME?	#NAME?	#NAME?	#NAME?	#NAME?	#NAME?	#NAME?	#NAME?	#NAME?
	39		0.000687359	0.00025549	0.00177596	0.000387874	3.13757	4561.53	#NAME?	#NAME?	#NAME?	#NAME?	#NAME?	#NAME?	#NAME?	#NAME?	#NAME?	#NAME?	#NAME?	#NAME?	#NAME?	#NAME?	#NAME?	#NAME?	#NAME?	#NAME?	#NAME?	#NAME?	#NAME?	#NAME?	#NAME?	#NAME?	#NAME?
	40		0.000578742	0.000209387	0.00153471	0.000338091	2.92796	5056.25	#NAME?	#NAME?	#NAME?	#NAME?	#NAME?	#NAME?	#NAME?	#NAME?	#NAME?	#NAME?	#NAME?	#NAME?	#NAME?	#NAME?	#NAME?	#NAME?	#NAME?	#NAME?	#NAME?	#NAME?	#NAME?	#NAME?	#NAME?	#NAME?	#NAME?
	41		0.000487289	0.000171603	0.00132623	0.000294547	2.73511	5610.18	#NAME?	#NAME?	#NAME?	#NAME?	#NAME?	#NAME?	#NAME?	#NAME?	#NAME?	#NAME?	#NAME?	#NAME?	#NAME?	#NAME?	#NAME?	#NAME?	#NAME?	#NAME?	#NAME?	#NAME?	#NAME?	#NAME?	#NAME?	#NAME?	#NAME?
	42		0.000410287	0.000140637	0.00114607	0.000256488	2.55737	6230.58	#NAME?	#NAME?	#NAME?	#NAME?	#NAME?	#NAME?	#NAME?	#NAME?	#NAME?	#NAME?	#NAME?	#NAME?	#NAME?	#NAME?	#NAME?	#NAME?	#NAME?	#NAME?	#NAME?	#NAME?	#NAME?	#NAME?	#NAME?	#NAME?	#NAME?
	43		0.000345453	0.000115259	0.000990385	0.000223246	2.3933	6925.61	#NAME?	#NAME?	#NAME?	#NAME?	#NAME?	#NAME?	#NAME?	#NAME?	#NAME?	#NAME?	#NAME?	#NAME?	#NAME?	#NAME?	#NAME?	#NAME?	#NAME?	#NAME?	#NAME?	#NAME?	#NAME?	#NAME?	#NAME?	#NAME?	#NAME?
	44		0.000290864	9.44608e-05	0.000855849	0.000194232	2.2416	7704.45	#NAME?	#NAME?	#NAME?	#NAME?	#NAME?	#NAME?	#NAME?	#NAME?	#NAME?	#NAME?	#NAME?	#NAME?	#NAME?	#NAME?	#NAME?	#NAME?	#NAME?	#NAME?	#NAME?	#NAME?	#NAME?	#NAME?	#NAME?	#NAME?	#NAME?
	45		0.000244902	7.74153e-05	0.000739588	0.000168922	2.10115	8577.44	#NAME?	#NAME?	#NAME?	#NAME?	#NAME?	#NAME?	#NAME?	#NAME?	#NAME?	#NAME?	#NAME?	#NAME?	#NAME?	#NAME?	#NAME?	#NAME?	#NAME?	#NAME?	#NAME?	#NAME?	#NAME?	#NAME?	#NAME?	#NAME?	#NAME?
	46		0.000206202	6.34457e-05	0.000639121	0.000146856	1.97092	9556.21	#NAME?	#NAME?	#NAME?	#NAME?	#NAME?	#NAME?	#NAME?	#NAME?	#NAME?	#NAME?	#NAME?	#NAME?	#NAME?	#NAME?	#NAME?	#NAME?	#NAME?	#NAME?	#NAME?	#NAME?	#NAME?	#NAME?	#NAME?	#NAME?	#NAME?
	47		0.000173618	5.19969e-05	0.000552301	0.000127629	1.85002	10653.9	#NAME?	#NAME?	#NAME?	#NAME?	#NAME?	#NAME?	#NAME?	#NAME?	#NAME?	#NAME?	#NAME?	#NAME?	#NAME?	#NAME?	#NAME?	#NAME?	#NAME?	#NAME?	#NAME?	#NAME?	#NAME?	#NAME?	#NAME?	#NAME?	#NAME?
	48		0.000146183	4.26141e-05	0.000477275	0.000110883	1.73765	11885.1	#NAME?	#NAME?	#NAME?	#NAME?	#NAME?	#NAME?	#NAME?	#NAME?	#NAME?	#NAME?	#NAME?	#NAME?	#NAME?	#NAME?	#NAME?	#NAME?	#NAME?	#NAME?	#NAME?	#NAME?	#NAME?	#NAME?	#NAME?	#NAME?	#NAME?
	49		0.000123083	3.49244e-05	0.000412441	9.63053e-05	1.63308	13266.5	#NAME?	#NAME?	#NAME?	#NAME?	#NAME?	#NAME?	#NAME?	#NAME?	#NAME?	#NAME?	#NAME?	#NAME?	#NAME?	#NAME?	#NAME?	#NAME?	#NAME?	#NAME?	#NAME?	#NAME?	#NAME?	#NAME?	#NAME?	#NAME?	#NAME?
	50		0.000103633	2.86223e-05	0.000356414	8.36204e-05	1.53567	14816.8	#NAME?	#NAME?	#NAME?	#NAME?	#NAME?	#NAME?	#NAME?	#NAME?	#NAME?	#NAME?	#NAME?	#NAME?	#NAME?	#NAME?	#NAME?	#NAME?	#NAME?	#NAME?	#NAME?	#NAME?	#NAME?	#NAME?	#NAME?	#NAME?	#NAME?
	51		8.7257e-05	2.34574e-05	0.000307998	7.25869e-05	1.44484	16557	#NAME?	#NAME?	#NAME?	#NAME?	#NAME?	#NAME?	#NAME?	#NAME?	#NAME?	#NAME?	#NAME?	#NAME?	#NAME?	#NAME?	#NAME?	#NAME?	#NAME?	#NAME?	#NAME?	#NAME?	#NAME?	#NAME?	#NAME?	#NAME?	#NAME?
	52		7.34685e-05	1.92245e-05	0.000266159	6.29935e-05	1.36005	18510.7	#NAME?	#NAME?	#NAME?	#NAME?	#NAME?	#NAME?	#NAME?	#NAME?	#NAME?	#NAME?	#NAME?	#NAME?	#NAME?	#NAME?	#NAME?	#NAME?	#NAME?	#NAME?	#NAME?	#NAME?	#NAME?	#NAME?	#NAME?	#NAME?	#NAME?
	53		6.1859e-05	1.57554e-05	0.000230003	5.46551e-05	1.28085	20704.6	#NAME?	#NAME?	#NAME?	#NAME?	#NAME?	#NAME?	#NAME?	#NAME?	#NAME?	#NAME?	#NAME?	#NAME?	#NAME?	#NAME?	#NAME?	#NAME?	#NAME?	#NAME?	#NAME?	#NAME?	#NAME?	#NAME?	#NAME?	#NAME?	#NAME?
	54		5.2084e-05	1.29124e-05	0.000198759	4.74099e-05	1.20678	23168.7	#NAME?	#NAME?	#NAME?	#NAME?	#NAME?	#NAME?	#NAME?	#NAME?	#NAME?	#NAME?	#NAME?	#NAME?	#NAME?	#NAME?	#NAME?	#NAME?	#NAME?	#NAME?	#NAME?	#NAME?	#NAME?	#NAME?	#NAME?	#NAME?	#NAME?
	55		4.38536e-05	1.05823e-05	0.000171759	4.11166e-05	1.13747	25936.8	#NAME?	#NAME?	#NAME?	#NAME?	#NAME?	#NAME?	#NAME?	#NAME?	#NAME?	#NAME?	#NAME?	#NAME?	#NAME?	#NAME?	#NAME?	#NAME?	#NAME?	#NAME?	#NAME?	#NAME?	#NAME?	#NAME?	#NAME?	#NAME?	#NAME?
	56		3.69238e-05	8.67274e-06	0.000148427	3.56516e-05	1.07257	29047	#NAME?	#NAME?	#NAME?	#NAME?	#NAME?	#NAME?	#NAME?	#NAME?	#NAME?	#NAME?	#NAME?	#NAME?	#NAME?	#NAME?	#NAME?	#NAME?	#NAME?	#NAME?	#NAME?	#NAME?	#NAME?	#NAME?	#NAME?	#NAME?	#NAME?
	57		3.10891e-05	7.10774e-06	0.000128264	3.09073e-05	1.01174	32542.1	#NAME?	#NAME?	#NAME?	#NAME?	#NAME?	#NAME?	#NAME?	#NAME?	#NAME?	#NAME?	#NAME?	#NAME?	#NAME?	#NAME?	#NAME?	#NAME?	#NAME?	#NAME?	#NAME?	#NAME?	#NAME?	#NAME?	#NAME?	#NAME?	#NAME?
	58		2.61764e-05	5.82515e-06	0.000110841	2.67897e-05	0.954687	36470.4	#NAME?	#NAME?	#NAME?	#NAME?	#NAME?	#NAME?	#NAME?	#NAME?	#NAME?	#NAME?	#NAME?	#NAME?	#NAME?	#NAME?	#NAME?	#NAME?	#NAME?	#NAME?	#NAME?	#NAME?	#NAME?	#NAME?	#NAME?	#NAME?	#NAME?
	59		2.204e-05	4.774e-06	9.57838e-05	2.32168e-05	0.90115	40886.2	#NAME?	#NAME?	#NAME?	#NAME?	#NAME?	#NAME?	#NAME?	#NAME?	#NAME?	#NAME?	#NAME?	#NAME?	#NAME?	#NAME?	#NAME?	#NAME?	#NAME?	#NAME?	#NAME?	#NAME?	#NAME?	#NAME?	#NAME?	#NAME?	#NAME?
	60		1.85572e-05	3.91253e-06	8.27723e-05	2.01173e-05	0.850879	45850.9	#NAME?	#NAME?	#NAME?	#NAME?	#NAME?	#NAME?	#NAME?	#NAME?	#NAME?	#NAME?	#NAME?	#NAME?	#NAME?	#NAME?	#NAME?	#NAME?	#NAME?	#NAME?	#NAME?	#NAME?	#NAME?	#NAME?	#NAME?	#NAME?	#NAME?
	61		1.56248e-05	3.20652e-06	7.15283e-05	1.7429e-05	0.803647	51433.3	#NAME?	#NAME?	#NAME?	#NAME?	#NAME?	#NAME?	#NAME?	#NAME?	#NAME?	#NAME?	#NAME?	#NAME?	#NAME?	#NAME?	#NAME?	#NAME?	#NAME?	#NAME?	#NAME?	#NAME?	#NAME?	#NAME?	#NAME?	#NAME?	#NAME?
	62		1.31557e-05	2.6279e-06	6.18118e-05	1.50979e-05	0.759245	57711.4	#NAME?	#NAME?	#NAME?	#NAME?	#NAME?	#NAME?	#NAME?	#NAME?	#NAME?	#NAME?	#NAME?	#NAME?	#NAME?	#NAME?	#NAME?	#NAME?	#NAME?	#NAME?	#NAME?	#NAME?	#NAME?	#NAME?	#NAME?	#NAME?	#NAME?
	63		1.10768e-05	2.15369e-06	5.34151e-05	1.30769e-05	0.717483	64772.5	#NAME?	#NAME?	#NAME?	#NAME?	#NAME?	#NAME?	#NAME?	#NAME?	#NAME?	#NAME?	#NAME?	#NAME?	#NAME?	#NAME?	#NAME?	#NAME?	#NAME?	#NAME?	#NAME?	#NAME?	#NAME?	#NAME?	#NAME?	#NAME?	#NAME?
	64		9.32648e-06	1.76506e-06	4.61591e-05	1.1325e-05	0.678185	72715.5	#NAME?	#NAME?	#NAME?	#NAME?	#NAME?	#NAME?	#NAME?	#NAME?	#NAME?	#NAME?	#NAME?	#NAME?	#NAME?	#NAME?	#NAME?	#NAME?	#NAME?	#NAME?	#NAME?	#NAME?	#NAME?	#NAME?	#NAME?	#NAME?	#NAME?
	65		7.8527e-06	1.44655e-06	3.98887e-05	9.80668e-06	0.641188	81651.3	#NAME?	#NAME?	#NAME?	#NAME?	#NAME?	#NAME?	#NAME?	#NAME?	#NAME?	#NAME?	#NAME?	#NAME?	#NAME?	#NAME?	#NAME?	#NAME?	#NAME?	#NAME?	#NAME?	#NAME?	#NAME?	#NAME?	#NAME?	#NAME?	#NAME?
	66		6.61181e-06	1.18552e-06	3.44701e-05	8.49098e-06	0.606342	91705.3	#NAME?	#NAME?	#NAME?	#NAME?	#NAME?	#NAME?	#NAME?	#NAME?	#NAME?	#NAME?	#NAME?	#NAME?	#NAME?	#NAME?	#NAME?	#NAME?	#NAME?	#NAME?	#NAME?	#NAME?	#NAME?	#NAME?	#NAME?	#NAME?	#NAME?
	67		5.56701e-06	9.71596e-07	2.97876e-05	7.35103e-06	0.573509	103019	#NAME?	#NAME?	#NAME?	#NAME?	#NAME?	#NAME?	#NAME?	#NAME?	#NAME?	#NAME?	#NAME?	#NAME?	#NAME?	#NAME?	#NAME?	#NAME?	#NAME?	#NAME?	#NAME?	#NAME?	#NAME?	#NAME?	#NAME?	#NAME?	#NAME?
	68		4.6873e-06	7.96271e-07	2.57412e-05	6.36351e-06	0.542559	115750	#NAME?	#NAME?	#NAME?	#NAME?	#NAME?	#NAME?	#NAME?	#NAME?	#NAME?	#NAME?	#NAME?	#NAME?	#NAME?	#NAME?	#NAME?	#NAME?	#NAME?	#NAME?	#NAME?	#NAME?	#NAME?	#NAME?	#NAME?	#NAME?	#NAME?
	69		3.94661e-06	6.52584e-07	2.22445e-05	5.50814e-06	0.513375	130079	#NAME?	#NAME?	#NAME?	#NAME?	#NAME?	#NAME?	#NAME?	#NAME?	#NAME?	#NAME?	#NAME?	#NAME?	#NAME?	#NAME?	#NAME?	#NAME?	#NAME?	#NAME?	#NAME?	#NAME?	#NAME?	#NAME?	#NAME?	#NAME?	#NAME?
	70		3.32296e-06	5.34825e-07	1.92227e-05	4.76732e-06	0.485845	146208	#NAME?	#NAME?	#NAME?	#NAME?	#NAME?	#NAME?	#NAME?	#NAME?	#NAME?	#NAME?	#NAME?	#NAME?	#NAME?	#NAME?	#NAME?	#NAME?	#NAME?	#NAME?	#NAME?	#NAME?	#NAME?	#NAME?	#NAME?	#NAME?	#NAME?
	71		2.79787e-06	4.38316e-07	1.66115e-05	4.12581e-06	0.459867	164363	#NAME?	#NAME?	#NAME?	#NAME?	#NAME?	#NAME?	#NAME?	#NAME?	#NAME?	#NAME?	#NAME?	#NAME?	#NAME?	#NAME?	#NAME?	#NAME?	#NAME?	#NAME?	#NAME?	#NAME?	#NAME?	#NAME?	#NAME?	#NAME?	#NAME?
	72		2.35575e-06	3.59222e-07	1.43549e-05	3.57033e-06	0.435347	184802	#NAME?	#NAME?	#NAME?	#NAME?	#NAME?	#NAME?	#NAME?	#NAME?	#NAME?	#NAME?	#NAME?	#NAME?	#NAME?	#NAME?	#NAME?	#NAME?	#NAME?	#NAME?	#NAME?	#NAME?	#NAME?	#NAME?	#NAME?	#NAME?	#NAME?
	73		1.98349e-06	2.944e-07	1.24049e-05	3.08942e-06	0.412195	207813	#NAME?	#NAME?	#NAME?	#NAME?	#NAME?	#NAME?	#NAME?	#NAME?	#NAME?	#NAME?	#NAME?	#NAME?	#NAME?	#NAME?	#NAME?	#NAME?	#NAME?	#NAME?	#NAME?	#NAME?	#NAME?	#NAME?	#NAME?	#NAME?	#NAME?
	74		1.67006e-06	2.41276e-07	1.07198e-05	2.6731e-06	0.390329	233721	#NAME?	#NAME?	#NAME?	#NAME?	#NAME?	#NAME?	#NAME?	#NAME?	#NAME?	#NAME?	#NAME?	#NAME?	#NAME?	#NAME?	#NAME?	#NAME?	#NAME?	#NAME?	#NAME?	#NAME?	#NAME?	#NAME?	#NAME?	#NAME?	#NAME?
	75		1.40615e-06	1.97737e-07	9.26361e-06	2.31272e-06	0.369671	262895	#NAME?	#NAME?	#NAME?	#NAME?	#NAME?	#NAME?	#NAME?	#NAME?	#NAME?	#NAME?	#NAME?	#NAME?	#NAME?	#NAME?	#NAME?	#NAME?	#NAME?	#NAME?	#NAME?	#NAME?	#NAME?	#NAME?	#NAME?	#NAME?	#NAME?
	76		1.18395e-06	1.62056e-07	8.00522e-06	2.00081e-06	0.350151	295747	#NAME?	#NAME?	#NAME?	#NAME?	#NAME?	#NAME?	#NAME?	#NAME?	#NAME?	#NAME?	#NAME?	#NAME?	#NAME?	#NAME?	#NAME?	#NAME?	#NAME?	#NAME?	#NAME?	#NAME?	#NAME?	#NAME?	#NAME?	#NAME?	#NAME?
	77		9.96862e-07	1.32813e-07	6.91777e-06	1.73086e-06	0.331701	332744	#NAME?	#NAME?	#NAME?	#NAME?	#NAME?	#NAME?	#NAME?	#NAME?	#NAME?	#NAME?	#NAME?	#NAME?	#NAME?	#NAME?	#NAME?	#NAME?	#NAME?	#NAME?	#NAME?	#NAME?	#NAME?	#NAME?	#NAME?	#NAME?	#NAME?
	78		8.39337e-07	1.08847e-07	5.97805e-06	1.49724e-06	0.314258	374411	#NAME?	#NAME?	#NAME?	#NAME?	#NAME?	#NAME?	#NAME?	#NAME?	#NAME?	#NAME?	#NAME?	#NAME?	#NAME?	#NAME?	#NAME?	#NAME?	#NAME?	#NAME?	#NAME?	#NAME?	#NAME?	#NAME?	#NAME?	#NAME?	#NAME?
	79		7.06704e-07	8.92053e-08	5.16597e-06	1.29509e-06	0.297764	421341	#NAME?	#NAME?	#NAME?	#NAME?	#NAME?	#NAME?	#NAME?	#NAME?	#NAME?	#NAME?	#NAME?	#NAME?	#NAME?	#NAME?	#NAME?	#NAME?	#NAME?	#NAME?	#NAME?	#NAME?	#NAME?	#NAME?	#NAME?	#NAME?	#NAME?
	80		5.9503e-07	7.31082e-08	4.46422e-06	1.12018e-06	0.282164	474200	#NAME?	#NAME?	#NAME?	#NAME?	#NAME?	#NAME?	#NAME?	#NAME?	#NAME?	#NAME?	#NAME?	#NAME?	#NAME?	#NAME?	#NAME?	#NAME?	#NAME?	#NAME?	#NAME?	#NAME?	#NAME?	#NAME?	#NAME?	#NAME?	#NAME?
	81		5.01003e-07	5.99158e-08	3.85779e-06	9.68845e-07	0.267406	533741	#NAME?	#NAME?	#NAME?	#NAME?	#NAME?	#NAME?	#NAME?	#NAME?	#NAME?	#NAME?	#NAME?	#NAME?	#NAME?	#NAME?	#NAME?	#NAME?	#NAME?	#NAME?	#NAME?	#NAME?	#NAME?	#NAME?	#NAME?	#NAME?	#NAME?
	82		4.21834e-07	4.9104e-08	3.33374e-06	8.37916e-07	0.253444	600813	#NAME?	#NAME?	#NAME?	#NAME?	#NAME?	#NAME?	#NAME?	#NAME?	#NAME?	#NAME?	#NAME?	#NAME?	#NAME?	#NAME?	#NAME?	#NAME?	#NAME?	#NAME?	#NAME?	#NAME?	#NAME?	#NAME?	#NAME?	#NAME?	#NAME?
	83		3.55176e-07	4.02432e-08	2.88087e-06	7.24651e-07	0.240231	676371	#NAME?	#NAME?	#NAME?	#NAME?	#NAME?	#NAME?	#NAME?	#NAME?	#NAME?	#NAME?	#NAME?	#NAME?	#NAME?	#NAME?	#NAME?	#NAME?	#NAME?	#NAME?	#NAME?	#NAME?	#NAME?	#NAME?	#NAME?	#NAME?	#NAME?
	84		2.99051e-07	3.29813e-08	2.48953e-06	6.2667e-07	0.227725	761492	#NAME?	#NAME?	#NAME?	#NAME?	#NAME?	#NAME?	#NAME?	#NAME?	#NAME?	#NAME?	#NAME?	#NAME?	#NAME?	#NAME?	#NAME?	#NAME?	#NAME?	#NAME?	#NAME?	#NAME?	#NAME?	#NAME?	#NAME?	#NAME?	#NAME?
	85		2.51794e-07	2.70298e-08	2.15135e-06	5.41917e-07	0.215886	857391	#NAME?	#NAME?	#NAME?	#NAME?	#NAME?	#NAME?	#NAME?	#NAME?	#NAME?	#NAME?	#NAME?	#NAME?	#NAME?	#NAME?	#NAME?	#NAME?	#NAME?	#NAME?	#NAME?	#NAME?	#NAME?	#NAME?	#NAME?	#NAME?	#NAME?
	86		2.12006e-07	2.21523e-08	1.8591e-06	4.6861e-07	0.204678	965437	#NAME?	#NAME?	#NAME?	#NAME?	#NAME?	#NAME?	#NAME?	#NAME?	#NAME?	#NAME?	#NAME?	#NAME?	#NAME?	#NAME?	#NAME?	#NAME?	#NAME?	#NAME?	#NAME?	#NAME?	#NAME?	#NAME?	#NAME?	#NAME?	#NAME?
	87		1.78504e-07	1.81549e-08	1.60656e-06	4.05205e-07	0.194065	1.08717e+06	#NAME?	#NAME?	#NAME?	#NAME?	#NAME?	#NAME?	#NAME?	#NAME?	#NAME?	#NAME?	#NAME?	#NAME?	#NAME?	#NAME?	#NAME?	#NAME?	#NAME?	#NAME?	#NAME?	#NAME?	#NAME?	#NAME?	#NAME?	#NAME?	#NAME?
	88		1.50297e-07	1.48788e-08	1.38832e-06	3.50367e-07	0.184015	1.22434e+06	#NAME?	#NAME?	#NAME?	#NAME?	#NAME?	#NAME?	#NAME?	#NAME?	#NAME?	#NAME?	#NAME?	#NAME?	#NAME?	#NAME?	#NAME?	#NAME?	#NAME?	#NAME?	#NAME?	#NAME?	#NAME?	#NAME?	#NAME?	#NAME?	#NAME?
	89		1.26547e-07	1.2194e-08	1.19973e-06	3.02942e-07	0.174495	1.3789e+06	#NAME?	#NAME?	#NAME?	#NAME?	#NAME?	#NAME?	#NAME?	#NAME?	#NAME?	#NAME?	#NAME?	#NAME?	#NAME?	#NAME?	#NAME?	#NAME?	#NAME?	#NAME?	#NAME?	#NAME?	#NAME?	#NAME?	#NAME?	#NAME?	#NAME?
	90		1.0655e-07	9.99355e-09	1.03675e-06	2.61928e-07	0.165478	1.55306e+06	#NAME?	#NAME?	#NAME?	#NAME?	#NAME?	#NAME?	#NAME?	#NAME?	#NAME?	#NAME?	#NAME?	#NAME?	#NAME?	#NAME?	#NAME?	#NAME?	#NAME?	#NAME?	#NAME?	#NAME?	#NAME?	#NAME?	#NAME?	#NAME?	#NAME?
	91		8.97127e-08	8.19021e-09	8.95918e-07	2.26461e-07	0.156935	1.74931e+06	#NAME?	#NAME?	#NAME?	#NAME?	#NAME?	#NAME?	#NAME?	#NAME?	#NAME?	#NAME?	#NAME?	#NAME?	#NAME?	#NAME?	#NAME?	#NAME?	#NAME?	#NAME?	#NAME?	#NAME?	#NAME?	#NAME?	#NAME?	#NAME?	#NAME?
	92		7.55362e-08	6.71229e-09	7.74215e-07	1.95791e-07	0.148841	1.97046e+06	#NAME?	#NAME?	#NAME?	#NAME?	#NAME?	#NAME?	#NAME?	#NAME?	#NAME?	#NAME?	#NAME?	#NAME?	#NAME?	#NAME?	#NAME?	#NAME?	#NAME?	#NAME?	#NAME?	#NAME?	#NAME?	#NAME?	#NAME?	#NAME?	#NAME?
	93		6.35999e-08	5.50106e-09	6.69043e-07	1.69271e-07	0.141172	2.21968e+06	#NAME?	#NAME?	#NAME?	#NAME?	#NAME?	#NAME?	#NAME?	#NAME?	#NAME?	#NAME?	#NAME?	#NAME?	#NAME?	#NAME?	#NAME?	#NAME?	#NAME?	#NAME?	#NAME?	#NAME?	#NAME?	#NAME?	#NAME?	#NAME?	#NAME?
	94		5.35498e-08	4.50839e-09	5.78159e-07	1.46339e-07	0.133904	2.50055e+06	#NAME?	#NAME?	#NAME?	#NAME?	#NAME?	#NAME?	#NAME?	#NAME?	#NAME?	#NAME?	#NAME?	#NAME?	#NAME?	#NAME?	#NAME?	#NAME?	#NAME?	#NAME?	#NAME?	#NAME?	#NAME?	#NAME?	#NAME?	#NAME?	#NAME?
	95		4.50878e-08	3.69485e-09	4.99621e-07	1.26512e-07	0.127016	2.81707e+06	#NAME?	#NAME?	#NAME?	#NAME?	#NAME?	#NAME?	#NAME?	#NAME?	#NAME?	#NAME?	#NAME?	#NAME?	#NAME?	#NAME?	#NAME?	#NAME?	#NAME?	#NAME?	#NAME?	#NAME?	#NAME?	#NAME?	#NAME?	#NAME?	#NAME?
	96		3.7963e-08	3.02811e-09	4.31751e-07	1.09368e-07	0.120487	3.1738e+06	#NAME?	#NAME?	#NAME?	#NAME?	#NAME?	#NAME?	#NAME?	#NAME?	#NAME?	#NAME?	#NAME?	#NAME?	#NAME?	#NAME?	#NAME?	#NAME?	#NAME?	#NAME?	#NAME?	#NAME?	#NAME?	#NAME?	#NAME?	#NAME?	#NAME?
	97		3.19641e-08	2.48169e-09	3.73101e-07	9.45457e-08	0.114298	3.57584e+06	#NAME?	#NAME?	#NAME?	#NAME?	#NAME?	#NAME?	#NAME?	#NAME?	#NAME?	#NAME?	#NAME?	#NAME?	#NAME?	#NAME?	#NAME?	#NAME?	#NAME?	#NAME?	#NAME?	#NAME?	#NAME?	#NAME?	#NAME?	#NAME?	#NAME?
	98		2.69131e-08	2.03387e-09	3.22418e-07	8.17307e-08	0.108432	4.02896e+06	#NAME?	#NAME?	#NAME?	#NAME?	#NAME?	#NAME?	#NAME?	#NAME?	#NAME?	#NAME?	#NAME?	#NAME?	#NAME?	#NAME?	#NAME?	#NAME?	#NAME?	#NAME?	#NAME?	#NAME?	#NAME?	#NAME?	#NAME?	#NAME?	#NAME?
	99		2.26603e-08	1.66686e-09	2.7862e-07	7.06513e-08	0.10287	4.53967e+06	#NAME?	#NAME?	#NAME?	#NAME?	#NAME?	#NAME?	#NAME?	#NAME?	#NAME?	#NAME?	#NAME?	#NAME?	#NAME?	#NAME?	#NAME?	#NAME?	#NAME?	#NAME?	#NAME?	#NAME?	#NAME?	#NAME?	#NAME?	#NAME?	#NAME?
	100		1.90795e-08	1.36607e-09	2.40772e-07	6.10729e-08	0.0975969	5.11528e+06	#NAME?	#NAME?	#NAME?	#NAME?	#NAME?	#NAME?	#NAME?	#NAME?	#NAME?	#NAME?	#NAME?	#NAME?	#NAME?	#NAME?	#NAME?	#NAME?	#NAME?	#NAME?	#NAME?	#NAME?	#NAME?	#NAME?	#NAME?	#NAME?	#NAME?
	101		1.60645e-08	1.11956e-09	2.08065e-07	5.27921e-08	0.092597	5.76407e+06	#NAME?	#NAME?	#NAME?	#NAME?	#NAME?	#NAME?	#NAME?	#NAME?	#NAME?	#NAME?	#NAME?	#NAME?	#NAME?	#NAME?	#NAME?	#NAME?	#NAME?	#NAME?	#NAME?	#NAME?	#NAME?	#NAME?	#NAME?	#NAME?	#NAME?
	102		1.3526e-08	9.17539e-10	1.79801e-07	4.56335e-08	0.0878559	6.49534e+06	#NAME?	#NAME?	#NAME?	#NAME?	#NAME?	#NAME?	#NAME?	#NAME?	#NAME?	#NAME?	#NAME?	#NAME?	#NAME?	#NAME?	#NAME?	#NAME?	#NAME?	#NAME?	#NAME?	#NAME?	#NAME?	#NAME?	#NAME?	#NAME?	#NAME?
	103		1.13886e-08	7.51969e-10	1.55376e-07	3.94449e-08	0.08336	7.3196e+06	#NAME?	#NAME?	#NAME?	#NAME?	#NAME?	#NAME?	#NAME?	#NAME?	#NAME?	#NAME?	#NAME?	#NAME?	#NAME?	#NAME?	#NAME?	#NAME?	#NAME?	#NAME?	#NAME?	#NAME?	#NAME?	#NAME?	#NAME?	#NAME?	#NAME?
	104		9.58896e-09	6.16276e-10	1.3427e-07	3.40952e-08	0.0790963	8.24869e+06	#NAME?	#NAME?			0	#NAME?			0	#NAME?			0	#NAME?			0	#NAME?			0	#NAME?			0
	YLD										#NAME?	#NAME?	#NAME?		#NAME?	#NAME?	#NAME?		#NAME?	#NAME?	#NAME?		#NAME?	#NAME?	#NAME?		#NAME?	#NAME?	#NAME?		#NAME?	#NAME?	#NAME?
PICS
			SCENARIO 3A												SCENARIO 3B												SCENARIO 3C
			Scenario 3A_V (Vaccinated)						Scenario 3A_U (Unvaccinated)						Scenario 3B (Vaccinated)						Scenario 3B_U (Unvaccinated)						Scenario 3C (Vaccinated)						Scenario 3B_U (Unvaccinated)
			COVID INCIDENCE	PICS INCIDENCE	LE tables (Yrs)	Duration (days)	Incidence-per year	DALYS	COVID INCIDENCE	PICS INCIDENCE	LE tables (Yrs)	Duration (days)	Incidence-per year	DALYS	COVID INCIDENCE	PICS INCIDENCE	LE tables (Yrs)	Duration (days)	Incidence-per year	DALYS	COVID INCIDENCE	PICS INCIDENCE	LE tables (Yrs)	Duration (days)	Incidence-per year	DALYS	COVID INCIDENCE	PICS INCIDENCE	LE tables (Yrs)	Duration (days)	Incidence-per year	DALYS	COVID INCIDENCE	PICS INCIDENCE	LE tables (Yrs)	Duration (days)	Incidence-per year	DALYS
	60-69		165.938	150.34	21.403	7803.43	3211.95	#NAME?	183.674	166.408	21.403	7803.43	3555.25	#NAME?	296.161	268.322	21.403	7803.43	5732.61	#NAME?	327.26	296.497	21.403	7803.43	6334.55	#NAME?	349.368	316.528	21.403	7803.43	6762.5	#NAME?	382.167	346.244	21.403	7803.43	7397.36	#NAME?
	70-79		75.9715	68.8302	13.4485	4898.07	923.025	#NAME?	84.0915	76.1869	13.4485	4898.07	1021.68	#NAME?	135.592	122.846	13.4485	4898.07	1647.39	#NAME?	149.83	135.746	13.4485	4898.07	1820.37	#NAME?	159.952	144.916	13.4485	4898.07	1943.35	#NAME?	174.968	158.521	13.4485	4898.07	2125.8	#NAME?
	80-89		17.9933	16.3019	7.10454	2580.93	115.193	#NAME?	19.9164	18.0443	7.10454	2580.93	127.504	#NAME?	32.1139	29.0952	7.10454	2580.93	205.593	#NAME?	35.486	32.1503	7.10454	2580.93	227.181	#NAME?	37.8833	34.3223	7.10454	2580.93	242.528	#NAME?	41.4398	37.5445	7.10454	2580.93	265.297	#NAME?
	90+		0	0	3.45069	1246.36	0	#NAME?	0	0	3.45069	1246.36	0	#NAME?	0	0	3.45069	1246.36	0	#NAME?	0	0	3.45069	1246.36	0	#NAME?	0	0	3.45069	1246.36	0	#NAME?	0	0	3.45069	1246.36	0	#NAME?
	TOTAL		259.903	235.472			4250.17	#NAME?	287.681	260.639			4704.43	#NAME?	463.867	420.264			7585.59	#NAME?	512.575	464.393			8382.11	#NAME?	547.204	495.766			8948.38	#NAME?	598.575	542.309			9788.46	#NAME?
Permanent
					SCENARIO 3A				SCENARIO 3B				SCENARIO 3C
					Scenario 3A (Vaccinated)		Scenario 3A (UNVaccinated)		Scenario 3B (Vaccinated)		Scenario 3B (UNVaccinated)		Scenario 3C (Vaccinated)		Scenario 3C (UNVaccinated)
			IHME 2019		COVID-19 consequences		COVID-19 consequences		COVID-19 consequences		COVID-19 consequences		COVID-19 consequences		COVID-19 consequences
					Base		Base		Base		Base		Base		Base
			Incidence Base	DALYS Base	Incidence	DALYS	Incidence	DALYS	Incidence	DALYS	Incidence	DALYS	Incidence	DALYS	Incidence	DALYS
1	Diabetes	587	69042.8	186528	#NAME?	#NAME?	#NAME?	#NAME?	#NAME?	#NAME?	#NAME?	#NAME?	#NAME?	#NAME?	#NAME?	#NAME?
2	Parkinsons	544	6598.01	38742.5	#NAME?	#NAME?	#NAME?	#NAME?	#NAME?	#NAME?	#NAME?	#NAME?	#NAME?	#NAME?	#NAME?	#NAME?
3	Dementia	543	43968.6	154293	#NAME?	#NAME?	#NAME?	#NAME?	#NAME?	#NAME?	#NAME?	#NAME?	#NAME?	#NAME?	#NAME?	#NAME?
4	Anxiety disorders	571	188750	139108	#NAME?	#NAME?	#NAME?	#NAME?	#NAME?	#NAME?	#NAME?	#NAME?	#NAME?	#NAME?	#NAME?	#NAME?
5	Ischemic Stroke	495	17984.1	114238	#NAME?	#NAME?	#NAME?	#NAME?	#NAME?	#NAME?	#NAME?	#NAME?	#NAME?	#NAME?	#NAME?	#NAME?
	Total with Diabetes					#NAME?		#NAME?		#NAME?		#NAME?		#NAME?		#NAME?
	Total without Diabetes					#NAME?		#NAME?		#NAME?		#NAME?		#NAME?		#NAME?
DALYS
			Scenario 3A_V (Vaccinated)							Scenario 3A_U (Unvaccinated)							Scenario 3B_V (Vaccinated)							Scenario 3B_U (Unvaccinated)							Scenario 3C_V (Vaccinated)							Scenario 3C_U (Unvaccinated)
			TOTAL DALYS				ERRUNOUTPUT			TOTAL DALYS				ERRUNOUTPUT			TOTAL DALYS				ERRUNOUTPUT			TOTAL DALYS				ERRUNOUTPUT			TOTAL DALYS				ERRUNOUTPUT			TOTAL DALYS				ERRUNOUTPUT
			YLL	YLD (Base)	DALYS	DALYS per 100,000 population				YLL	YLD (Base)	DALYS	DALYS per 100,000 population				YLL	YLD (Base)	DALYS	DALYS per 100,000 population				YLL	YLD (Base)	DALYS	DALYS per 100,000 population				YLL	YLD (Base)	DALYS	DALYS per 100,000 population				YLL	YLD (Base)	DALYS	DALYS per 100,000 population
	YLL_3AV_N		13855.4				#NAME?		YLL_3AU_N	29036.9				#NAME?		YLL_3BV_N	21801.2				#NAME?		YLL_3BU_N	45043.2				#NAME?		YLL_3CV_N	23878.9				#NAME?		YLL_3CU_N	46275.2				#NAME?
	YLD_Acute_3AV_N			#NAME?			#NAME?		YLD_Acute_3AU_N		#NAME?			#NAME?		YLD_Acute_3BV_N		#NAME?			#NAME?		YLD_Acute_3BU_N		#NAME?			#NAME?		YLD_Acute_3CV_N		#NAME?			#NAME?		YLD_Acute_3CU_N		#NAME?			#NAME?
	YLD_Chronic_3AV_N			#NAME?			#NAME?		YLD_Chronic_3AU_N		#NAME?			#NAME?		YLD_Chronic_3BV_N		#NAME?			#NAME?		YLD_Chronic_3BU_N		#NAME?			#NAME?		YLD_Chronic_3CV_N		#NAME?			#NAME?		YLD_Chronic_3CU_N		#NAME?			#NAME?
	YLD_PICS_3AV_N			#NAME?			#NAME?		YLD_PICS_3AU_N		#NAME?			#NAME?		YLD_PICS_3BV_N		#NAME?			#NAME?		YLD_PICS_3BU_N		#NAME?			#NAME?		YLD_PICS_3CV_N		#NAME?			#NAME?		YLD_PICS_3CU_N		#NAME?			#NAME?
	DALY_Perm_Diab_3AV_N			#NAME?			#NAME?		DALY_Perm_Diab_3AU_N		#NAME?			#NAME?		DALY_Perm_Diab_3BV_N		#NAME?			#NAME?		DALY_Perm_Diab_3BU_N		#NAME?			#NAME?		DALY_Perm_Diab_3CV_N		#NAME?			#NAME?		DALY_Perm_Diab_3CU_N		#NAME?			#NAME?
	DALY_Perm_WoDiab_3AV_N			#NAME?			#NAME?		DALY_Perm_WoDiab_3AU_N		#NAME?			#NAME?		DALY_Perm_WoDiab_3BV_N		#NAME?			#NAME?		DALY_Perm_WoDiab_3BU_N		#NAME?			#NAME?		DALY_Perm_WoDiab_3CV_N		#NAME?			#NAME?		DALY_Perm_WoDiab_3CU_N		#NAME?			#NAME?
	TOTAL YLD Baseline_3AV_N			#NAME?		#NAME?	#NAME?		TOTAL YLD Baseline_3AU_N		#NAME?		#NAME?	#NAME?		TOTAL YLD Baseline_3BV_N		#NAME?		#NAME?	#NAME?		TOTAL YLD Baseline_3BU_N		#NAME?		#NAME?	#NAME?		TOTAL YLD Baseline_3CV_N		#NAME?		#NAME?	#NAME?		TOTAL YLD Baseline_3CU_N		#NAME?		#NAME?	#NAME?
	TOTAL YLD with Diabetes_3AV_N			#NAME?		#NAME?	#NAME?		TOTAL YLD with Diabetes_3AU_N		#NAME?		#NAME?	#NAME?		TOTAL YLD with Diabetes_3BV_N		#NAME?		#NAME?	#NAME?		TOTAL YLD with Diabetes_3BU_N		#NAME?		#NAME?	#NAME?		TOTAL YLD with Diabetes_3CV_N		#NAME?		#NAME?	#NAME?		TOTAL YLD with Diabetes_3CU_N		#NAME?		#NAME?	#NAME?
	TOTAL YLD without Diabetes_3AV_N			#NAME?		#NAME?	#NAME?		TOTAL YLD without Diabetes_3AU_N		#NAME?		#NAME?	#NAME?		TOTAL YLD without Diabetes_3BV_N		#NAME?		#NAME?	#NAME?		TOTAL YLD without Diabetes_3BU_N		#NAME?		#NAME?	#NAME?		TOTAL YLD without Diabetes_3CV_N		#NAME?		#NAME?	#NAME?		TOTAL YLD without Diabetes_3CU_N		#NAME?		#NAME?	#NAME?
	TOTAL DALYS Baseline_3AV_N				#NAME?	#NAME?	#NAME?		TOTAL DALYS Baseline_3AU_N			#NAME?	#NAME?	#NAME?		TOTAL DALYS Baseline_3BV_N			#NAME?	#NAME?	#NAME?		TOTAL DALYS Baseline_3BU_N			#NAME?	#NAME?	#NAME?		TOTAL DALYS Baseline_3CV_N			#NAME?	#NAME?	#NAME?		TOTAL DALYS Baseline_3CU_N			#NAME?	#NAME?	#NAME?
	Total DALY_D_3AV_N				#NAME?	#NAME?	#NAME?		Total DALY_D_3AU_N			#NAME?	#NAME?	#NAME?		Total DALY_D_3BV_N			#NAME?	#NAME?	#NAME?		Total DALY_D_3BU_N			#NAME?	#NAME?	#NAME?		Total DALY_D_3CV_N			#NAME?	#NAME?	#NAME?		Total DALY_D_3CU_N			#NAME?	#NAME?	#NAME?
	Total DALYS_WoD_3AV_N				#NAME?	#NAME?	#NAME?		Total DALYS_WoD_3AU_N			#NAME?	#NAME?	#NAME?		Total DALYS_WoD_3BV_N			#NAME?	#NAME?	#NAME?		Total DALYS_WoD_3BU_N			#NAME?	#NAME?	#NAME?		Total DALYS_WoD_3CV_N			#NAME?	#NAME?	#NAME?		Total DALYS_WoD_3CU_N			#NAME?	#NAME?	#NAME?
			Scenario 3A_Combined													Scenario 3B_Combined														Scenario IC_Combined
			TOTAL DALYS				ERRUNOUTPUT										TOTAL DALYS				ERRUNOUTPUT										TOTAL DALYS				ERRUNOUTPUT
			YLL	YLD (Base)	DALYS	DALYS per 100,000 population											YLL	YLD (Base)	DALYS	DALYS per 100,000 population											YLL	YLD (Base)	DALYS	DALYS per 100,000 population
	YLL_3A_Combined_NSW		#NAME?				#NAME?									YLL_3B_Combined_NSW	#NAME?				#NAME?									YLL_3C_Combined_NSW	#NAME?				#NAME?
	YLD_Acute_3A_Combined_NSW			#NAME?			#NAME?									YLD_Acute_3B_Combined_NSW		#NAME?			#NAME?									YLD_Acute_3C_Combined_NSW		#NAME?			#NAME?
	YLD_Chronic_3A_Combined_NSW			#NAME?			#NAME?									YLD_Chronic_3B_Combined_NSW		#NAME?			#NAME?									YLD_Chronic_3C_Combined_NSW		#NAME?			#NAME?
	YLD_PICS_3A_Combined_NSW			#NAME?			#NAME?									YLD_PICS_3B_Combined_NSW		#NAME?			#NAME?									YLD_PICS_3C_Combined_NSW		#NAME?			#NAME?
	DALY_Perm_Diab_3A_Combined_NSW			#NAME?			#NAME?									DALY_Perm_Diab_3B_Combined_NSW		#NAME?			#NAME?									DALY_Perm_Diab_3C_Combined_NSW		#NAME?			#NAME?
	DALY_Perm_WoDiab_3A_Combined_NSW			#NAME?			#NAME?									DALY_Perm_WoDiab_3B_Combined_NSW		#NAME?			#NAME?									DALY_Perm_WoDiab_3C_Combined_NSW		#NAME?			#NAME?
	TOTAL YLD Baseline_3A_Combined_NSW			#NAME?		#NAME?	#NAME?									TOTAL YLD Baseline_3B_Combined_NSW		#NAME?		#NAME?	#NAME?									TOTAL YLD Baseline_3C_Combined_NSW		#NAME?		#NAME?	#NAME?
	TOTAL YLD with Diabetes_3A_Combined_NSW			#NAME?		#NAME?	#NAME?									TOTAL YLD with Diabetes_3B_Combined_NSW		#NAME?		#NAME?	#NAME?									TOTAL YLD with Diabetes_3C_Combined_NSW		#NAME?		#NAME?	#NAME?
	TOTAL YLD without Diabetes_3A_Combined_NSW			#NAME?		#NAME?	#NAME?									TOTAL YLD without Diabetes_3B_Combined_NSW		#NAME?		#NAME?	#NAME?									TOTAL YLD without Diabetes_3C_Combined_NSW		#NAME?		#NAME?	#NAME?
	TOTAL DALYS Baseline_3A_Combined_NSW				#NAME?	#NAME?	#NAME?									TOTAL DALYS Baseline_3B_Combined_NSW			#NAME?	#NAME?	#NAME?									TOTAL DALYS Baseline_3C_Combined_NSW			#NAME?	#NAME?	#NAME?
	Total DALY_D_3A_Combined_NSW				#NAME?	#NAME?	#NAME?									Total DALY_D_3B_Combined_NSW			#NAME?	#NAME?	#NAME?									Total DALY_D_3C_Combined_NSW			#NAME?	#NAME?	#NAME?
	Total DALYS_WoD_3A_Combined_NSW				#NAME?	#NAME?	#NAME?									Total DALYS_WoD_3B_Combined_NSW			#NAME?	#NAME?	#NAME?									Total DALYS_WoD_3C_Combined_NSW			#NAME?	#NAME?	#NAME?

## Sheet: Scenario 4 NSW
DALYS Calculation (Scenario 4: 80% and low, medium or high seeding infections assuming baseline PHSMs and optimal TTIQ)
Back to "read me"
Mortality (YLL)
				DEATH						YLL
	Age	Mid	LETotals	Scenario 4A_V (Vaccinated)	Scenario 4A_U (Unvaccinated)	Scenario 4B_V (Vaccinated)	Scenario 4B_U (Unvaccinated)	Scenario 4C_V (Vaccinated)	Scenario 4C_U (Unvaccinated)	Scenario 4A_V (Vaccinated)	Scenario 4A_U (Unvaccinated)	Scenario 4B_V (Vaccinated)	Scenario 4B_U (Unvaccinated)	Scenario 4C_V (Vaccinated)	Scenario 4C_U (Unvaccinated)
	0-9	5	78.2138	0	0	0	0	0	0	0	0	0	0	0	0
	10-19	15	68.2659	0.00612089	0.0145371	0.0879878	0.198164	0.394797	0.889059	0.417848	0.992388	6.00656	13.5278	26.9512	60.6924
	20-29	25	58.5115	0.0428462	0.10176	0.615914	1.38715	2.76358	6.22341	2.507	5.95412	36.0381	81.1641	161.701	364.141
	30-39	35	48.8546	0.055088	0.130834	0.79189	1.78347	3.55318	8.00153	2.6913	6.39184	38.6874	87.1308	173.589	390.911
	40-49	45	39.3018	0.128539	0.305279	1.84774	4.16144	8.29074	18.6702	5.05179	11.998	72.6195	163.552	325.841	733.773
	50-59	55	30.0933	0.336649	0.799541	4.83933	10.899	21.7138	48.8982	10.1309	24.0608	145.631	327.987	653.441	1471.51
	60-69	65	21.403	0.575363	1.36649	8.27085	18.6274	37.1109	83.5715	12.3145	29.2469	177.021	398.681	794.284	1788.68
	70-79	75	13.4485	1.54246	3.66335	22.1729	49.9373	99.4889	224.043	20.7438	49.2666	298.192	671.581	1337.98	3013.04
	80-89	85	7.10454	3.10329	7.37031	44.6098	100.469	200.162	450.753	22.0474	52.3627	316.932	713.786	1422.06	3202.39
	90-100	95	3.45069	2.20964	5.2479	31.7636	71.5371	142.522	320.95	7.62477	18.1088	109.606	246.852	491.798	1107.5
	weighted mean/Total			8	19	115	259	516	1162	83.5293	198.382	1200.73	2704.26	5387.64	12132.6
Morbidity (YLD)
PARAMETERS
AUSTALIAN POPULATION			Scenario 4A_V (Vaccinated)	Scenario 4A_U (Unvaccinated)	Scenario 4B_V (Vaccinated)	Scenario 4B_U (Unvaccinated)	Scenario 4C_V (Vaccinated)	Scenario 4C_U (Unvaccinated)			Scenario 4A_V (Vaccinated)	Scenario 4A_U (Unvaccinated)	Scenario 4B_V (Vaccinated)	Scenario 4B_U (Unvaccinated)	Scenario 4C_V (Vaccinated)	Scenario 4C_U (Unvaccinated)		PICS:ICU Survival	Scenario 4A_V (Vaccinated)	Scenario 4A_U (Unvaccinated)	Scenario 4B_V (Vaccinated)	Scenario 4B_U (Unvaccinated)	Scenario 4C_V (Vaccinated)	Scenario 4C_U (Unvaccinated)
Australian COVID case (without death)			716	4884	9779	63036	40671	234412		Moderate	671	4750	9166	61244	38072	227016		60-69	0.971818	1.21477	12.6336	14.3343	63.1681	72.4004
Australian poulation as of 31Dec2020 (e)			25694393	25694393	25694393	25694393	25694393	25694393		Severe	44	131	620	1787	2558	7206		70-79	0.444929	0.556161	5.78407	6.5627	28.9204	33.1472
Australian COVID case with deaths			724	4903	9894	63295	41187	235574		Critical	9	22	108	264	557	1352		80-89	0.105378	0.131722	1.36991	1.55432	6.84956	7.85065
Ausrtalian COVID cases (>10 and above)			716	2575.38	9779	33655.7	40671	129501										90+	0	0	0	0	0	0
Australian COVID cases (Hosp without death; >30 years old)			542.167	966	7357	12802.8	30096.3	51051.9										Totals	1.52212	1.90265	19.7876	22.4513	98.9381	113.398
YEAR			365.25
DISABILITY WEIGHTS (g)			MID	LL	UL	sigma	alpha1	alpha2	ERSATZ
DW(Moderate)			0.051	0.032	0.074	0.0107143	21.4511	399.158	#NAME?
DW(Severe)			0.133	0.088	0.19	0.0260204	22.5184	146.793	#NAME?
DW(Critical)			0.655	0.579	0.727	0.0377551	103.182	54.3476	#NAME?
DW(Chronic)			0.219	0.148	0.308	0.0408163	22.2649	79.4013	#NAME?
DW(Afib as proxy for PICS) (i)			0.224	0.151	0.312	0.0410714	22.8582	79.1875	#NAME?
SEVERITY DISTRIBUTION
ACUTE (Proportion)			%	Duration (days)
N Asymptomatic (will not be added in the YLD) (h)			NA	14
N(Moderate) (a)			NA	14
N(Severe) (a)			NA	14
N(Critical)* (a)			NA	14
CHRONIC			%	Duration (days)		OR	95%CI LL	95%CI UL	RR	LL	UL	SE	ERSATZ
Post (acute) after symptomatic duration to 2 years			See ONS Post-Acute Sheet		Treatment effect of full dose of COVID vaccine	0.51	0.32	0.82	0.540174	0.346891	0.837179	0.0923705	#NAME?
Post-intesive care syndrome			%	Duration (days)
1) PICS			0.906	RLE
Permanent functional impairment			%	LL	UL		Duration	sigma	alpha1	alpha2	ERSATZ
2) Diabetes			0.0282921	0.0256649	0.0312028		RLE	0.00141273	389.685	13384	#NAME?
3) Parkinsons			0.0011	0.00079	0.0014		RLE	0.000155612	49.9126	45325.2	#NAME?
4) Dementia			0.0067	0.0059	0.0075		RLE	0.000408163	267.64	39678.7	#NAME?
5) Anxiety Disorders			0.0711	0.0682	0.0741		RLE	0.0015051	2072.82	27080.8	#NAME?
5) Ischaemic Stroke			0.0076	0.0068	0.0085		RLE	0.000433673	304.774	39797	#NAME?
ACUTE
Morbidity calculation (Total incidence cases/Checking/Scenario analysis)
			Scenario 4A						Scenario 4B						Scenario 4C
			Scenario 4A_V (Vaccinated)			Scenario 4A_U (Unvaccinated)			Scenario 4B_V (Vaccinated)			Scenario 4B_U (Unvaccinated)			Scenario 4C_V (Vaccinated)			Scenario 4C_U (Unvaccinated)
				Case (Person - years)	YLD		Case (Person - years)	YLD		Case (Person - years)	YLD		Case (Person - years)	YLD		Case (Person - years)	YLD		Case (Person - years)	YLD
			Base	Base	Base DL	Base	Base	Base DL	Base	Base	Base DL	Base	Base	Base DL	Base	Base	Base DL	Base	Base	Base DL
	Moderate		671	25.7194	#NAME?	4750	182.067	#NAME?	9166	351.332	#NAME?	61244	2347.48	#NAME?	38072	1459.3	#NAME?	227016	8701.5	#NAME?
	Severe		44	1.68652	#NAME?	131	5.02122	#NAME?	620	23.7645	#NAME?	1787	68.4956	#NAME?	2558	98.0479	#NAME?	7206	276.205	#NAME?
	Critical		9	0.344969	#NAME?	22	0.843258	#NAME?	108	4.13963	#NAME?	264	10.1191	#NAME?	557	21.3498	#NAME?	1352	51.822	#NAME?
	TOTAL				#NAME?			#NAME?			#NAME?			#NAME?			#NAME?			#NAME?
CHRONIC/LONG COVID
										SCENARIO 4A								SCENARIO 4B								SCENARIO 4C
			NSW			ERSATZ				Scenario4IA_V (Vaccinated)				Scenario 4A_U (Unvaccinated)				Scenario 4B_V (Vaccinated)				Scenario 4B_U (Unvaccinated)				Scenario 4C_V (Vaccinated)				Scenario 4C_U (Unvaccinated)
	weeks		Baseline	LL	UL	sigma	alpha1	alpha2	Ersazt	Recalculation (mutually exclusive)	Incidence	DALYs/year	DALYS per 100,000	Recalculation (mutually exclusive)	Incidence	DALYs/year	DALYS per 100,000	Recalculation (mutually exclusive)	Incidence	DALYs/year	DALYS per 100,000	Recalculation (mutually exclusive)	Incidence	DALYs/year	DALYS per 100,000	Recalculation (mutually exclusive)	Incidence	DALYs/year	DALYS per 100,000	Recalculation (mutually exclusive)	Incidence	DALYs/year	DALYS per 100,000
	0		0.5629	0.5997	0.5276	-0.0183929	408.834	317.466	#NAME?	#NAME?	#NAME?	#NAME?	#NAME?	#NAME?	#NAME?	#NAME?	#NAME?	#NAME?	#NAME?	#NAME?	#NAME?	#NAME?	#NAME?	#NAME?	#NAME?	#NAME?	#NAME?	#NAME?	#NAME?	#NAME?	#NAME?	#NAME?	#NAME?
	1		0.47395	0.491484	0.45593	-0.00907002	1435.93	1593.77	#NAME?	#NAME?	#NAME?	#NAME?	#NAME?	#NAME?	#NAME?	#NAME?	#NAME?	#NAME?	#NAME?	#NAME?	#NAME?	#NAME?	#NAME?	#NAME?	#NAME?	#NAME?	#NAME?	#NAME?	#NAME?	#NAME?	#NAME?	#NAME?	#NAME?
	2		0.399056	0.402796	0.393995	-0.00224506	18986.1	28591.5	#NAME?	#NAME?	#NAME?	#NAME?	#NAME?	#NAME?	#NAME?	#NAME?	#NAME?	#NAME?	#NAME?	#NAME?	#NAME?	#NAME?	#NAME?	#NAME?	#NAME?	#NAME?	#NAME?	#NAME?	#NAME?	#NAME?	#NAME?	#NAME?	#NAME?
	3		0.335997	0.330111	0.340474	0.00264354	10726.4	21197.7	#NAME?	#NAME?	#NAME?	#NAME?	#NAME?	#NAME?	#NAME?	#NAME?	#NAME?	#NAME?	#NAME?	#NAME?	#NAME?	#NAME?	#NAME?	#NAME?	#NAME?	#NAME?	#NAME?	#NAME?	#NAME?	#NAME?	#NAME?	#NAME?	#NAME?
	4		0.282902	0.270543	0.294223	0.00604095	1572.4	3985.69	#NAME?	#NAME?	#NAME?	#NAME?	#NAME?	#NAME?	#NAME?	#NAME?	#NAME?	#NAME?	#NAME?	#NAME?	#NAME?	#NAME?	#NAME?	#NAME?	#NAME?	#NAME?	#NAME?	#NAME?	#NAME?	#NAME?	#NAME?	#NAME?	#NAME?
	5		0.238198	0.221723	0.254255	0.00829899	627.34	2006.35	#NAME?	#NAME?	#NAME?	#NAME?	#NAME?	#NAME?	#NAME?	#NAME?	#NAME?	#NAME?	#NAME?	#NAME?	#NAME?	#NAME?	#NAME?	#NAME?	#NAME?	#NAME?	#NAME?	#NAME?	#NAME?	#NAME?	#NAME?	#NAME?	#NAME?
	6		0.200558	0.181713	0.219717	0.00969474	341.931	1362.97	#NAME?	#NAME?	#NAME?	#NAME?	#NAME?	#NAME?	#NAME?	#NAME?	#NAME?	#NAME?	#NAME?	#NAME?	#NAME?	#NAME?	#NAME?	#NAME?	#NAME?	#NAME?	#NAME?	#NAME?	#NAME?	#NAME?	#NAME?	#NAME?	#NAME?
	7		0.168865	0.148923	0.18987	0.0104456	217.044	1068.26	#NAME?	#NAME?	#NAME?	#NAME?	#NAME?	#NAME?	#NAME?	#NAME?	#NAME?	#NAME?	#NAME?	#NAME?	#NAME?	#NAME?	#NAME?	#NAME?	#NAME?	#NAME?	#NAME?	#NAME?	#NAME?	#NAME?	#NAME?	#NAME?	#NAME?
	8		0.142181	0.12205	0.164077	0.0107213	150.721	909.342	#NAME?	#NAME?	#NAME?	#NAME?	#NAME?	#NAME?	#NAME?	#NAME?	#NAME?	#NAME?	#NAME?	#NAME?	#NAME?	#NAME?	#NAME?	#NAME?	#NAME?	#NAME?	#NAME?	#NAME?	#NAME?	#NAME?	#NAME?	#NAME?	#NAME?
	9		0.119714	0.100026	0.141789	0.0106538	111.029	816.424	#NAME?	#NAME?	#NAME?	#NAME?	#NAME?	#NAME?	#NAME?	#NAME?	#NAME?	#NAME?	#NAME?	#NAME?	#NAME?	#NAME?	#NAME?	#NAME?	#NAME?	#NAME?	#NAME?	#NAME?	#NAME?	#NAME?	#NAME?	#NAME?	#NAME?
	10		0.100796	0.0819762	0.122528	0.0103448	85.2688	760.683	#NAME?	#NAME?	#NAME?	#NAME?	#NAME?	#NAME?	#NAME?	#NAME?	#NAME?	#NAME?	#NAME?	#NAME?	#NAME?	#NAME?	#NAME?	#NAME?	#NAME?	#NAME?	#NAME?	#NAME?	#NAME?	#NAME?	#NAME?	#NAME?	#NAME?
	11		0.0848684	0.0671836	0.105883	0.00987239	67.5438	728.322	#NAME?	#NAME?	#NAME?	#NAME?	#NAME?	#NAME?	#NAME?	#NAME?	#NAME?	#NAME?	#NAME?	#NAME?	#NAME?	#NAME?	#NAME?	#NAME?	#NAME?	#NAME?	#NAME?	#NAME?	#NAME?	#NAME?	#NAME?	#NAME?	#NAME?
	12		0.0714574	0.0550603	0.0914999	0.00929582	54.7968	712.049	#NAME?	#NAME?	#NAME?	#NAME?	#NAME?	#NAME?	#NAME?	#NAME?	#NAME?	#NAME?	#NAME?	#NAME?	#NAME?	#NAME?	#NAME?	#NAME?	#NAME?	#NAME?	#NAME?	#NAME?	#NAME?	#NAME?	#NAME?	#NAME?	#NAME?
	13		0.0601657	0.0451247	0.0790704	0.00865962	45.308	707.747	#NAME?	#NAME?	#NAME?	#NAME?	#NAME?	#NAME?	#NAME?	#NAME?	#NAME?	#NAME?	#NAME?	#NAME?	#NAME?	#NAME?	#NAME?	#NAME?	#NAME?	#NAME?	#NAME?	#NAME?	#NAME?	#NAME?	#NAME?	#NAME?	#NAME?
	14		0.0506582	0.0369819	0.0683293	0.00799677	38.0466	712.997	#NAME?	#NAME?	#NAME?	#NAME?	#NAME?	#NAME?	#NAME?	#NAME?	#NAME?	#NAME?	#NAME?	#NAME?	#NAME?	#NAME?	#NAME?	#NAME?	#NAME?	#NAME?	#NAME?	#NAME?	#NAME?	#NAME?	#NAME?	#NAME?	#NAME?
	15		0.0426532	0.0303085	0.0590473	0.00733131	32.3621	726.365	#NAME?	#NAME?	#NAME?	#NAME?	#NAME?	#NAME?	#NAME?	#NAME?	#NAME?	#NAME?	#NAME?	#NAME?	#NAME?	#NAME?	#NAME?	#NAME?	#NAME?	#NAME?	#NAME?	#NAME?	#NAME?	#NAME?	#NAME?	#NAME?	#NAME?
	16		0.0359131	0.0248394	0.0510262	0.00668031	27.8272	747.02	#NAME?	#NAME?	#NAME?	#NAME?	#NAME?	#NAME?	#NAME?	#NAME?	#NAME?	#NAME?	#NAME?	#NAME?	#NAME?	#NAME?	#NAME?	#NAME?	#NAME?	#NAME?	#NAME?	#NAME?	#NAME?	#NAME?	#NAME?	#NAME?	#NAME?
	17		0.0302381	0.0203571	0.0440946	0.0060555	24.1507	774.535	#NAME?	#NAME?	#NAME?	#NAME?	#NAME?	#NAME?	#NAME?	#NAME?	#NAME?	#NAME?	#NAME?	#NAME?	#NAME?	#NAME?	#NAME?	#NAME?	#NAME?	#NAME?	#NAME?	#NAME?	#NAME?	#NAME?	#NAME?	#NAME?	#NAME?
	18		0.0254598	0.0166837	0.0381047	0.00546456	21.1289	808.764	#NAME?	#NAME?	#NAME?	#NAME?	#NAME?	#NAME?	#NAME?	#NAME?	#NAME?	#NAME?	#NAME?	#NAME?	#NAME?	#NAME?	#NAME?	#NAME?	#NAME?	#NAME?	#NAME?	#NAME?	#NAME?	#NAME?	#NAME?	#NAME?	#NAME?
	19		0.0214366	0.0136731	0.0329285	0.00491209	18.6153	849.77	#NAME?	#NAME?	#NAME?	#NAME?	#NAME?	#NAME?	#NAME?	#NAME?	#NAME?	#NAME?	#NAME?	#NAME?	#NAME?	#NAME?	#NAME?	#NAME?	#NAME?	#NAME?	#NAME?	#NAME?	#NAME?	#NAME?	#NAME?	#NAME?	#NAME?
`	20		0.0180492	0.0112058	0.0284554	0.00440042	16.5023	897.791	#NAME?	#NAME?	#NAME?	#NAME?	#NAME?	#NAME?	#NAME?	#NAME?	#NAME?	#NAME?	#NAME?	#NAME?	#NAME?	#NAME?	#NAME?	#NAME?	#NAME?	#NAME?	#NAME?	#NAME?	#NAME?	#NAME?	#NAME?	#NAME?	#NAME?
	21		0.0151971	0.00918369	0.02459	0.00393017	14.7095	953.206	#NAME?	#NAME?	#NAME?	#NAME?	#NAME?	#NAME?	#NAME?	#NAME?	#NAME?	#NAME?	#NAME?	#NAME?	#NAME?	#NAME?	#NAME?	#NAME?	#NAME?	#NAME?	#NAME?	#NAME?	#NAME?	#NAME?	#NAME?	#NAME?	#NAME?
	22		0.0127956	0.0075265	0.0212496	0.00350079	13.1757	1016.53	#NAME?	#NAME?	#NAME?	#NAME?	#NAME?	#NAME?	#NAME?	#NAME?	#NAME?	#NAME?	#NAME?	#NAME?	#NAME?	#NAME?	#NAME?	#NAME?	#NAME?	#NAME?	#NAME?	#NAME?	#NAME?	#NAME?	#NAME?	#NAME?	#NAME?
	23		0.0107736	0.00616834	0.018363	0.00311089	11.8538	1088.41	#NAME?	#NAME?	#NAME?	#NAME?	#NAME?	#NAME?	#NAME?	#NAME?	#NAME?	#NAME?	#NAME?	#NAME?	#NAME?	#NAME?	#NAME?	#NAME?	#NAME?	#NAME?	#NAME?	#NAME?	#NAME?	#NAME?	#NAME?	#NAME?	#NAME?
	24		0.00907118	0.00505526	0.0158685	0.00275849	10.7068	1169.6	#NAME?	#NAME?	#NAME?	#NAME?	#NAME?	#NAME?	#NAME?	#NAME?	#NAME?	#NAME?	#NAME?	#NAME?	#NAME?	#NAME?	#NAME?	#NAME?	#NAME?	#NAME?	#NAME?	#NAME?	#NAME?	#NAME?	#NAME?	#NAME?	#NAME?
	25		0.00763774	0.00414304	0.0137129	0.0024413	9.70549	1261.02	#NAME?	#NAME?	#NAME?	#NAME?	#NAME?	#NAME?	#NAME?	#NAME?	#NAME?	#NAME?	#NAME?	#NAME?	#NAME?	#NAME?	#NAME?	#NAME?	#NAME?	#NAME?	#NAME?	#NAME?	#NAME?	#NAME?	#NAME?	#NAME?	#NAME?
	26		0.00643082	0.00339543	0.0118501	0.00215681	8.82654	1363.71	#NAME?	#NAME?	#NAME?	#NAME?	#NAME?	#NAME?	#NAME?	#NAME?	#NAME?	#NAME?	#NAME?	#NAME?	#NAME?	#NAME?	#NAME?	#NAME?	#NAME?	#NAME?	#NAME?	#NAME?	#NAME?	#NAME?	#NAME?	#NAME?	#NAME?
	27		0.00541462	0.00278272	0.0102404	0.00190246	8.05106	1478.86	#NAME?	#NAME?	#NAME?	#NAME?	#NAME?	#NAME?	#NAME?	#NAME?	#NAME?	#NAME?	#NAME?	#NAME?	#NAME?	#NAME?	#NAME?	#NAME?	#NAME?	#NAME?	#NAME?	#NAME?	#NAME?	#NAME?	#NAME?	#NAME?	#NAME?
	28		0.00455899	0.00228058	0.0088493	0.00167569	7.36369	1607.84	#NAME?	#NAME?	#NAME?	#NAME?	#NAME?	#NAME?	#NAME?	#NAME?	#NAME?	#NAME?	#NAME?	#NAME?	#NAME?	#NAME?	#NAME?	#NAME?	#NAME?	#NAME?	#NAME?	#NAME?	#NAME?	#NAME?	#NAME?	#NAME?	#NAME?
	29		0.00383858	0.00186905	0.00764719	0.00147402	6.75179	1752.18	#NAME?	#NAME?	#NAME?	#NAME?	#NAME?	#NAME?	#NAME?	#NAME?	#NAME?	#NAME?	#NAME?	#NAME?	#NAME?	#NAME?	#NAME?	#NAME?	#NAME?	#NAME?	#NAME?	#NAME?	#NAME?	#NAME?	#NAME?	#NAME?	#NAME?
	30		0.003232	0.00153178	0.00660838	0.00129505	6.20494	1913.64	#NAME?	#NAME?	#NAME?	#NAME?	#NAME?	#NAME?	#NAME?	#NAME?	#NAME?	#NAME?	#NAME?	#NAME?	#NAME?	#NAME?	#NAME?	#NAME?	#NAME?	#NAME?	#NAME?	#NAME?	#NAME?	#NAME?	#NAME?	#NAME?	#NAME?
	31		0.00272128	0.00125537	0.00571068	0.00113656	5.71441	2094.19	#NAME?	#NAME?	#NAME?	#NAME?	#NAME?	#NAME?	#NAME?	#NAME?	#NAME?	#NAME?	#NAME?	#NAME?	#NAME?	#NAME?	#NAME?	#NAME?	#NAME?	#NAME?	#NAME?	#NAME?	#NAME?	#NAME?	#NAME?	#NAME?	#NAME?
	32		0.00229126	0.00102884	0.00493493	0.000996452	5.27292	2296.05	#NAME?	#NAME?	#NAME?	#NAME?	#NAME?	#NAME?	#NAME?	#NAME?	#NAME?	#NAME?	#NAME?	#NAME?	#NAME?	#NAME?	#NAME?	#NAME?	#NAME?	#NAME?	#NAME?	#NAME?	#NAME?	#NAME?	#NAME?	#NAME?	#NAME?
	33		0.00192919	0.000843184	0.00426456	0.000872799	4.8743	2521.72	#NAME?	#NAME?	#NAME?	#NAME?	#NAME?	#NAME?	#NAME?	#NAME?	#NAME?	#NAME?	#NAME?	#NAME?	#NAME?	#NAME?	#NAME?	#NAME?	#NAME?	#NAME?	#NAME?	#NAME?	#NAME?	#NAME?	#NAME?	#NAME?	#NAME?
	34		0.00162434	0.000691031	0.00368525	0.000763831	4.51333	2774.05	#NAME?	#NAME?	#NAME?	#NAME?	#NAME?	#NAME?	#NAME?	#NAME?	#NAME?	#NAME?	#NAME?	#NAME?	#NAME?	#NAME?	#NAME?	#NAME?	#NAME?	#NAME?	#NAME?	#NAME?	#NAME?	#NAME?	#NAME?	#NAME?	#NAME?
	35		0.00136766	0.000566334	0.00318464	0.000667934	4.18555	3056.19	#NAME?	#NAME?	#NAME?	#NAME?	#NAME?	#NAME?	#NAME?	#NAME?	#NAME?	#NAME?	#NAME?	#NAME?	#NAME?	#NAME?	#NAME?	#NAME?	#NAME?	#NAME?	#NAME?	#NAME?	#NAME?	#NAME?	#NAME?	#NAME?	#NAME?
	36		0.00115154	0.000464139	0.00275203	0.000583645	3.88716	3371.73	#NAME?	#NAME?	#NAME?	#NAME?	#NAME?	#NAME?	#NAME?	#NAME?	#NAME?	#NAME?	#NAME?	#NAME?	#NAME?	#NAME?	#NAME?	#NAME?	#NAME?	#NAME?	#NAME?	#NAME?	#NAME?	#NAME?	#NAME?	#NAME?	#NAME?
	37		0.000969574	0.000380385	0.00237819	0.000509643	3.61486	3724.68	#NAME?	#NAME?	#NAME?	#NAME?	#NAME?	#NAME?	#NAME?	#NAME?	#NAME?	#NAME?	#NAME?	#NAME?	#NAME?	#NAME?	#NAME?	#NAME?	#NAME?	#NAME?	#NAME?	#NAME?	#NAME?	#NAME?	#NAME?	#NAME?	#NAME?
	38		0.000816361	0.000311745	0.00205513	0.000444741	3.36582	4119.59	#NAME?	#NAME?	#NAME?	#NAME?	#NAME?	#NAME?	#NAME?	#NAME?	#NAME?	#NAME?	#NAME?	#NAME?	#NAME?	#NAME?	#NAME?	#NAME?	#NAME?	#NAME?	#NAME?	#NAME?	#NAME?	#NAME?	#NAME?	#NAME?	#NAME?
	39		0.000687359	0.00025549	0.00177596	0.000387874	3.13757	4561.53	#NAME?	#NAME?	#NAME?	#NAME?	#NAME?	#NAME?	#NAME?	#NAME?	#NAME?	#NAME?	#NAME?	#NAME?	#NAME?	#NAME?	#NAME?	#NAME?	#NAME?	#NAME?	#NAME?	#NAME?	#NAME?	#NAME?	#NAME?	#NAME?	#NAME?
	40		0.000578742	0.000209387	0.00153471	0.000338091	2.92796	5056.25	#NAME?	#NAME?	#NAME?	#NAME?	#NAME?	#NAME?	#NAME?	#NAME?	#NAME?	#NAME?	#NAME?	#NAME?	#NAME?	#NAME?	#NAME?	#NAME?	#NAME?	#NAME?	#NAME?	#NAME?	#NAME?	#NAME?	#NAME?	#NAME?	#NAME?
	41		0.000487289	0.000171603	0.00132623	0.000294547	2.73511	5610.18	#NAME?	#NAME?	#NAME?	#NAME?	#NAME?	#NAME?	#NAME?	#NAME?	#NAME?	#NAME?	#NAME?	#NAME?	#NAME?	#NAME?	#NAME?	#NAME?	#NAME?	#NAME?	#NAME?	#NAME?	#NAME?	#NAME?	#NAME?	#NAME?	#NAME?
	42		0.000410287	0.000140637	0.00114607	0.000256488	2.55737	6230.58	#NAME?	#NAME?	#NAME?	#NAME?	#NAME?	#NAME?	#NAME?	#NAME?	#NAME?	#NAME?	#NAME?	#NAME?	#NAME?	#NAME?	#NAME?	#NAME?	#NAME?	#NAME?	#NAME?	#NAME?	#NAME?	#NAME?	#NAME?	#NAME?	#NAME?
	43		0.000345453	0.000115259	0.000990385	0.000223246	2.3933	6925.61	#NAME?	#NAME?	#NAME?	#NAME?	#NAME?	#NAME?	#NAME?	#NAME?	#NAME?	#NAME?	#NAME?	#NAME?	#NAME?	#NAME?	#NAME?	#NAME?	#NAME?	#NAME?	#NAME?	#NAME?	#NAME?	#NAME?	#NAME?	#NAME?	#NAME?
	44		0.000290864	9.44608e-05	0.000855849	0.000194232	2.2416	7704.45	#NAME?	#NAME?	#NAME?	#NAME?	#NAME?	#NAME?	#NAME?	#NAME?	#NAME?	#NAME?	#NAME?	#NAME?	#NAME?	#NAME?	#NAME?	#NAME?	#NAME?	#NAME?	#NAME?	#NAME?	#NAME?	#NAME?	#NAME?	#NAME?	#NAME?
	45		0.000244902	7.74153e-05	0.000739588	0.000168922	2.10115	8577.44	#NAME?	#NAME?	#NAME?	#NAME?	#NAME?	#NAME?	#NAME?	#NAME?	#NAME?	#NAME?	#NAME?	#NAME?	#NAME?	#NAME?	#NAME?	#NAME?	#NAME?	#NAME?	#NAME?	#NAME?	#NAME?	#NAME?	#NAME?	#NAME?	#NAME?
	46		0.000206202	6.34457e-05	0.000639121	0.000146856	1.97092	9556.21	#NAME?	#NAME?	#NAME?	#NAME?	#NAME?	#NAME?	#NAME?	#NAME?	#NAME?	#NAME?	#NAME?	#NAME?	#NAME?	#NAME?	#NAME?	#NAME?	#NAME?	#NAME?	#NAME?	#NAME?	#NAME?	#NAME?	#NAME?	#NAME?	#NAME?
	47		0.000173618	5.19969e-05	0.000552301	0.000127629	1.85002	10653.9	#NAME?	#NAME?	#NAME?	#NAME?	#NAME?	#NAME?	#NAME?	#NAME?	#NAME?	#NAME?	#NAME?	#NAME?	#NAME?	#NAME?	#NAME?	#NAME?	#NAME?	#NAME?	#NAME?	#NAME?	#NAME?	#NAME?	#NAME?	#NAME?	#NAME?
	48		0.000146183	4.26141e-05	0.000477275	0.000110883	1.73765	11885.1	#NAME?	#NAME?	#NAME?	#NAME?	#NAME?	#NAME?	#NAME?	#NAME?	#NAME?	#NAME?	#NAME?	#NAME?	#NAME?	#NAME?	#NAME?	#NAME?	#NAME?	#NAME?	#NAME?	#NAME?	#NAME?	#NAME?	#NAME?	#NAME?	#NAME?
	49		0.000123083	3.49244e-05	0.000412441	9.63053e-05	1.63308	13266.5	#NAME?	#NAME?	#NAME?	#NAME?	#NAME?	#NAME?	#NAME?	#NAME?	#NAME?	#NAME?	#NAME?	#NAME?	#NAME?	#NAME?	#NAME?	#NAME?	#NAME?	#NAME?	#NAME?	#NAME?	#NAME?	#NAME?	#NAME?	#NAME?	#NAME?
	50		0.000103633	2.86223e-05	0.000356414	8.36204e-05	1.53567	14816.8	#NAME?	#NAME?	#NAME?	#NAME?	#NAME?	#NAME?	#NAME?	#NAME?	#NAME?	#NAME?	#NAME?	#NAME?	#NAME?	#NAME?	#NAME?	#NAME?	#NAME?	#NAME?	#NAME?	#NAME?	#NAME?	#NAME?	#NAME?	#NAME?	#NAME?
	51		8.7257e-05	2.34574e-05	0.000307998	7.25869e-05	1.44484	16557	#NAME?	#NAME?	#NAME?	#NAME?	#NAME?	#NAME?	#NAME?	#NAME?	#NAME?	#NAME?	#NAME?	#NAME?	#NAME?	#NAME?	#NAME?	#NAME?	#NAME?	#NAME?	#NAME?	#NAME?	#NAME?	#NAME?	#NAME?	#NAME?	#NAME?
	52		7.34685e-05	1.92245e-05	0.000266159	6.29935e-05	1.36005	18510.7	#NAME?	#NAME?	#NAME?	#NAME?	#NAME?	#NAME?	#NAME?	#NAME?	#NAME?	#NAME?	#NAME?	#NAME?	#NAME?	#NAME?	#NAME?	#NAME?	#NAME?	#NAME?	#NAME?	#NAME?	#NAME?	#NAME?	#NAME?	#NAME?	#NAME?
	53		6.1859e-05	1.57554e-05	0.000230003	5.46551e-05	1.28085	20704.6	#NAME?	#NAME?	#NAME?	#NAME?	#NAME?	#NAME?	#NAME?	#NAME?	#NAME?	#NAME?	#NAME?	#NAME?	#NAME?	#NAME?	#NAME?	#NAME?	#NAME?	#NAME?	#NAME?	#NAME?	#NAME?	#NAME?	#NAME?	#NAME?	#NAME?
	54		5.2084e-05	1.29124e-05	0.000198759	4.74099e-05	1.20678	23168.7	#NAME?	#NAME?	#NAME?	#NAME?	#NAME?	#NAME?	#NAME?	#NAME?	#NAME?	#NAME?	#NAME?	#NAME?	#NAME?	#NAME?	#NAME?	#NAME?	#NAME?	#NAME?	#NAME?	#NAME?	#NAME?	#NAME?	#NAME?	#NAME?	#NAME?
	55		4.38536e-05	1.05823e-05	0.000171759	4.11166e-05	1.13747	25936.8	#NAME?	#NAME?	#NAME?	#NAME?	#NAME?	#NAME?	#NAME?	#NAME?	#NAME?	#NAME?	#NAME?	#NAME?	#NAME?	#NAME?	#NAME?	#NAME?	#NAME?	#NAME?	#NAME?	#NAME?	#NAME?	#NAME?	#NAME?	#NAME?	#NAME?
	56		3.69238e-05	8.67274e-06	0.000148427	3.56516e-05	1.07257	29047	#NAME?	#NAME?	#NAME?	#NAME?	#NAME?	#NAME?	#NAME?	#NAME?	#NAME?	#NAME?	#NAME?	#NAME?	#NAME?	#NAME?	#NAME?	#NAME?	#NAME?	#NAME?	#NAME?	#NAME?	#NAME?	#NAME?	#NAME?	#NAME?	#NAME?
	57		3.10891e-05	7.10774e-06	0.000128264	3.09073e-05	1.01174	32542.1	#NAME?	#NAME?	#NAME?	#NAME?	#NAME?	#NAME?	#NAME?	#NAME?	#NAME?	#NAME?	#NAME?	#NAME?	#NAME?	#NAME?	#NAME?	#NAME?	#NAME?	#NAME?	#NAME?	#NAME?	#NAME?	#NAME?	#NAME?	#NAME?	#NAME?
	58		2.61764e-05	5.82515e-06	0.000110841	2.67897e-05	0.954687	36470.4	#NAME?	#NAME?	#NAME?	#NAME?	#NAME?	#NAME?	#NAME?	#NAME?	#NAME?	#NAME?	#NAME?	#NAME?	#NAME?	#NAME?	#NAME?	#NAME?	#NAME?	#NAME?	#NAME?	#NAME?	#NAME?	#NAME?	#NAME?	#NAME?	#NAME?
	59		2.204e-05	4.774e-06	9.57838e-05	2.32168e-05	0.90115	40886.2	#NAME?	#NAME?	#NAME?	#NAME?	#NAME?	#NAME?	#NAME?	#NAME?	#NAME?	#NAME?	#NAME?	#NAME?	#NAME?	#NAME?	#NAME?	#NAME?	#NAME?	#NAME?	#NAME?	#NAME?	#NAME?	#NAME?	#NAME?	#NAME?	#NAME?
	60		1.85572e-05	3.91253e-06	8.27723e-05	2.01173e-05	0.850879	45850.9	#NAME?	#NAME?	#NAME?	#NAME?	#NAME?	#NAME?	#NAME?	#NAME?	#NAME?	#NAME?	#NAME?	#NAME?	#NAME?	#NAME?	#NAME?	#NAME?	#NAME?	#NAME?	#NAME?	#NAME?	#NAME?	#NAME?	#NAME?	#NAME?	#NAME?
	61		1.56248e-05	3.20652e-06	7.15283e-05	1.7429e-05	0.803647	51433.3	#NAME?	#NAME?	#NAME?	#NAME?	#NAME?	#NAME?	#NAME?	#NAME?	#NAME?	#NAME?	#NAME?	#NAME?	#NAME?	#NAME?	#NAME?	#NAME?	#NAME?	#NAME?	#NAME?	#NAME?	#NAME?	#NAME?	#NAME?	#NAME?	#NAME?
	62		1.31557e-05	2.6279e-06	6.18118e-05	1.50979e-05	0.759245	57711.4	#NAME?	#NAME?	#NAME?	#NAME?	#NAME?	#NAME?	#NAME?	#NAME?	#NAME?	#NAME?	#NAME?	#NAME?	#NAME?	#NAME?	#NAME?	#NAME?	#NAME?	#NAME?	#NAME?	#NAME?	#NAME?	#NAME?	#NAME?	#NAME?	#NAME?
	63		1.10768e-05	2.15369e-06	5.34151e-05	1.30769e-05	0.717483	64772.5	#NAME?	#NAME?	#NAME?	#NAME?	#NAME?	#NAME?	#NAME?	#NAME?	#NAME?	#NAME?	#NAME?	#NAME?	#NAME?	#NAME?	#NAME?	#NAME?	#NAME?	#NAME?	#NAME?	#NAME?	#NAME?	#NAME?	#NAME?	#NAME?	#NAME?
	64		9.32648e-06	1.76506e-06	4.61591e-05	1.1325e-05	0.678185	72715.5	#NAME?	#NAME?	#NAME?	#NAME?	#NAME?	#NAME?	#NAME?	#NAME?	#NAME?	#NAME?	#NAME?	#NAME?	#NAME?	#NAME?	#NAME?	#NAME?	#NAME?	#NAME?	#NAME?	#NAME?	#NAME?	#NAME?	#NAME?	#NAME?	#NAME?
	65		7.8527e-06	1.44655e-06	3.98887e-05	9.80668e-06	0.641188	81651.3	#NAME?	#NAME?	#NAME?	#NAME?	#NAME?	#NAME?	#NAME?	#NAME?	#NAME?	#NAME?	#NAME?	#NAME?	#NAME?	#NAME?	#NAME?	#NAME?	#NAME?	#NAME?	#NAME?	#NAME?	#NAME?	#NAME?	#NAME?	#NAME?	#NAME?
	66		6.61181e-06	1.18552e-06	3.44701e-05	8.49098e-06	0.606342	91705.3	#NAME?	#NAME?	#NAME?	#NAME?	#NAME?	#NAME?	#NAME?	#NAME?	#NAME?	#NAME?	#NAME?	#NAME?	#NAME?	#NAME?	#NAME?	#NAME?	#NAME?	#NAME?	#NAME?	#NAME?	#NAME?	#NAME?	#NAME?	#NAME?	#NAME?
	67		5.56701e-06	9.71596e-07	2.97876e-05	7.35103e-06	0.573509	103019	#NAME?	#NAME?	#NAME?	#NAME?	#NAME?	#NAME?	#NAME?	#NAME?	#NAME?	#NAME?	#NAME?	#NAME?	#NAME?	#NAME?	#NAME?	#NAME?	#NAME?	#NAME?	#NAME?	#NAME?	#NAME?	#NAME?	#NAME?	#NAME?	#NAME?
	68		4.6873e-06	7.96271e-07	2.57412e-05	6.36351e-06	0.542559	115750	#NAME?	#NAME?	#NAME?	#NAME?	#NAME?	#NAME?	#NAME?	#NAME?	#NAME?	#NAME?	#NAME?	#NAME?	#NAME?	#NAME?	#NAME?	#NAME?	#NAME?	#NAME?	#NAME?	#NAME?	#NAME?	#NAME?	#NAME?	#NAME?	#NAME?
	69		3.94661e-06	6.52584e-07	2.22445e-05	5.50814e-06	0.513375	130079	#NAME?	#NAME?	#NAME?	#NAME?	#NAME?	#NAME?	#NAME?	#NAME?	#NAME?	#NAME?	#NAME?	#NAME?	#NAME?	#NAME?	#NAME?	#NAME?	#NAME?	#NAME?	#NAME?	#NAME?	#NAME?	#NAME?	#NAME?	#NAME?	#NAME?
	70		3.32296e-06	5.34825e-07	1.92227e-05	4.76732e-06	0.485845	146208	#NAME?	#NAME?	#NAME?	#NAME?	#NAME?	#NAME?	#NAME?	#NAME?	#NAME?	#NAME?	#NAME?	#NAME?	#NAME?	#NAME?	#NAME?	#NAME?	#NAME?	#NAME?	#NAME?	#NAME?	#NAME?	#NAME?	#NAME?	#NAME?	#NAME?
	71		2.79787e-06	4.38316e-07	1.66115e-05	4.12581e-06	0.459867	164363	#NAME?	#NAME?	#NAME?	#NAME?	#NAME?	#NAME?	#NAME?	#NAME?	#NAME?	#NAME?	#NAME?	#NAME?	#NAME?	#NAME?	#NAME?	#NAME?	#NAME?	#NAME?	#NAME?	#NAME?	#NAME?	#NAME?	#NAME?	#NAME?	#NAME?
	72		2.35575e-06	3.59222e-07	1.43549e-05	3.57033e-06	0.435347	184802	#NAME?	#NAME?	#NAME?	#NAME?	#NAME?	#NAME?	#NAME?	#NAME?	#NAME?	#NAME?	#NAME?	#NAME?	#NAME?	#NAME?	#NAME?	#NAME?	#NAME?	#NAME?	#NAME?	#NAME?	#NAME?	#NAME?	#NAME?	#NAME?	#NAME?
	73		1.98349e-06	2.944e-07	1.24049e-05	3.08942e-06	0.412195	207813	#NAME?	#NAME?	#NAME?	#NAME?	#NAME?	#NAME?	#NAME?	#NAME?	#NAME?	#NAME?	#NAME?	#NAME?	#NAME?	#NAME?	#NAME?	#NAME?	#NAME?	#NAME?	#NAME?	#NAME?	#NAME?	#NAME?	#NAME?	#NAME?	#NAME?
	74		1.67006e-06	2.41276e-07	1.07198e-05	2.6731e-06	0.390329	233721	#NAME?	#NAME?	#NAME?	#NAME?	#NAME?	#NAME?	#NAME?	#NAME?	#NAME?	#NAME?	#NAME?	#NAME?	#NAME?	#NAME?	#NAME?	#NAME?	#NAME?	#NAME?	#NAME?	#NAME?	#NAME?	#NAME?	#NAME?	#NAME?	#NAME?
	75		1.40615e-06	1.97737e-07	9.26361e-06	2.31272e-06	0.369671	262895	#NAME?	#NAME?	#NAME?	#NAME?	#NAME?	#NAME?	#NAME?	#NAME?	#NAME?	#NAME?	#NAME?	#NAME?	#NAME?	#NAME?	#NAME?	#NAME?	#NAME?	#NAME?	#NAME?	#NAME?	#NAME?	#NAME?	#NAME?	#NAME?	#NAME?
	76		1.18395e-06	1.62056e-07	8.00522e-06	2.00081e-06	0.350151	295747	#NAME?	#NAME?	#NAME?	#NAME?	#NAME?	#NAME?	#NAME?	#NAME?	#NAME?	#NAME?	#NAME?	#NAME?	#NAME?	#NAME?	#NAME?	#NAME?	#NAME?	#NAME?	#NAME?	#NAME?	#NAME?	#NAME?	#NAME?	#NAME?	#NAME?
	77		9.96862e-07	1.32813e-07	6.91777e-06	1.73086e-06	0.331701	332744	#NAME?	#NAME?	#NAME?	#NAME?	#NAME?	#NAME?	#NAME?	#NAME?	#NAME?	#NAME?	#NAME?	#NAME?	#NAME?	#NAME?	#NAME?	#NAME?	#NAME?	#NAME?	#NAME?	#NAME?	#NAME?	#NAME?	#NAME?	#NAME?	#NAME?
	78		8.39337e-07	1.08847e-07	5.97805e-06	1.49724e-06	0.314258	374411	#NAME?	#NAME?	#NAME?	#NAME?	#NAME?	#NAME?	#NAME?	#NAME?	#NAME?	#NAME?	#NAME?	#NAME?	#NAME?	#NAME?	#NAME?	#NAME?	#NAME?	#NAME?	#NAME?	#NAME?	#NAME?	#NAME?	#NAME?	#NAME?	#NAME?
	79		7.06704e-07	8.92053e-08	5.16597e-06	1.29509e-06	0.297764	421341	#NAME?	#NAME?	#NAME?	#NAME?	#NAME?	#NAME?	#NAME?	#NAME?	#NAME?	#NAME?	#NAME?	#NAME?	#NAME?	#NAME?	#NAME?	#NAME?	#NAME?	#NAME?	#NAME?	#NAME?	#NAME?	#NAME?	#NAME?	#NAME?	#NAME?
	80		5.9503e-07	7.31082e-08	4.46422e-06	1.12018e-06	0.282164	474200	#NAME?	#NAME?	#NAME?	#NAME?	#NAME?	#NAME?	#NAME?	#NAME?	#NAME?	#NAME?	#NAME?	#NAME?	#NAME?	#NAME?	#NAME?	#NAME?	#NAME?	#NAME?	#NAME?	#NAME?	#NAME?	#NAME?	#NAME?	#NAME?	#NAME?
	81		5.01003e-07	5.99158e-08	3.85779e-06	9.68845e-07	0.267406	533741	#NAME?	#NAME?	#NAME?	#NAME?	#NAME?	#NAME?	#NAME?	#NAME?	#NAME?	#NAME?	#NAME?	#NAME?	#NAME?	#NAME?	#NAME?	#NAME?	#NAME?	#NAME?	#NAME?	#NAME?	#NAME?	#NAME?	#NAME?	#NAME?	#NAME?
	82		4.21834e-07	4.9104e-08	3.33374e-06	8.37916e-07	0.253444	600813	#NAME?	#NAME?	#NAME?	#NAME?	#NAME?	#NAME?	#NAME?	#NAME?	#NAME?	#NAME?	#NAME?	#NAME?	#NAME?	#NAME?	#NAME?	#NAME?	#NAME?	#NAME?	#NAME?	#NAME?	#NAME?	#NAME?	#NAME?	#NAME?	#NAME?
	83		3.55176e-07	4.02432e-08	2.88087e-06	7.24651e-07	0.240231	676371	#NAME?	#NAME?	#NAME?	#NAME?	#NAME?	#NAME?	#NAME?	#NAME?	#NAME?	#NAME?	#NAME?	#NAME?	#NAME?	#NAME?	#NAME?	#NAME?	#NAME?	#NAME?	#NAME?	#NAME?	#NAME?	#NAME?	#NAME?	#NAME?	#NAME?
	84		2.99051e-07	3.29813e-08	2.48953e-06	6.2667e-07	0.227725	761492	#NAME?	#NAME?	#NAME?	#NAME?	#NAME?	#NAME?	#NAME?	#NAME?	#NAME?	#NAME?	#NAME?	#NAME?	#NAME?	#NAME?	#NAME?	#NAME?	#NAME?	#NAME?	#NAME?	#NAME?	#NAME?	#NAME?	#NAME?	#NAME?	#NAME?
	85		2.51794e-07	2.70298e-08	2.15135e-06	5.41917e-07	0.215886	857391	#NAME?	#NAME?	#NAME?	#NAME?	#NAME?	#NAME?	#NAME?	#NAME?	#NAME?	#NAME?	#NAME?	#NAME?	#NAME?	#NAME?	#NAME?	#NAME?	#NAME?	#NAME?	#NAME?	#NAME?	#NAME?	#NAME?	#NAME?	#NAME?	#NAME?
	86		2.12006e-07	2.21523e-08	1.8591e-06	4.6861e-07	0.204678	965437	#NAME?	#NAME?	#NAME?	#NAME?	#NAME?	#NAME?	#NAME?	#NAME?	#NAME?	#NAME?	#NAME?	#NAME?	#NAME?	#NAME?	#NAME?	#NAME?	#NAME?	#NAME?	#NAME?	#NAME?	#NAME?	#NAME?	#NAME?	#NAME?	#NAME?
	87		1.78504e-07	1.81549e-08	1.60656e-06	4.05205e-07	0.194065	1.08717e+06	#NAME?	#NAME?	#NAME?	#NAME?	#NAME?	#NAME?	#NAME?	#NAME?	#NAME?	#NAME?	#NAME?	#NAME?	#NAME?	#NAME?	#NAME?	#NAME?	#NAME?	#NAME?	#NAME?	#NAME?	#NAME?	#NAME?	#NAME?	#NAME?	#NAME?
	88		1.50297e-07	1.48788e-08	1.38832e-06	3.50367e-07	0.184015	1.22434e+06	#NAME?	#NAME?	#NAME?	#NAME?	#NAME?	#NAME?	#NAME?	#NAME?	#NAME?	#NAME?	#NAME?	#NAME?	#NAME?	#NAME?	#NAME?	#NAME?	#NAME?	#NAME?	#NAME?	#NAME?	#NAME?	#NAME?	#NAME?	#NAME?	#NAME?
	89		1.26547e-07	1.2194e-08	1.19973e-06	3.02942e-07	0.174495	1.3789e+06	#NAME?	#NAME?	#NAME?	#NAME?	#NAME?	#NAME?	#NAME?	#NAME?	#NAME?	#NAME?	#NAME?	#NAME?	#NAME?	#NAME?	#NAME?	#NAME?	#NAME?	#NAME?	#NAME?	#NAME?	#NAME?	#NAME?	#NAME?	#NAME?	#NAME?
	90		1.0655e-07	9.99355e-09	1.03675e-06	2.61928e-07	0.165478	1.55306e+06	#NAME?	#NAME?	#NAME?	#NAME?	#NAME?	#NAME?	#NAME?	#NAME?	#NAME?	#NAME?	#NAME?	#NAME?	#NAME?	#NAME?	#NAME?	#NAME?	#NAME?	#NAME?	#NAME?	#NAME?	#NAME?	#NAME?	#NAME?	#NAME?	#NAME?
	91		8.97127e-08	8.19021e-09	8.95918e-07	2.26461e-07	0.156935	1.74931e+06	#NAME?	#NAME?	#NAME?	#NAME?	#NAME?	#NAME?	#NAME?	#NAME?	#NAME?	#NAME?	#NAME?	#NAME?	#NAME?	#NAME?	#NAME?	#NAME?	#NAME?	#NAME?	#NAME?	#NAME?	#NAME?	#NAME?	#NAME?	#NAME?	#NAME?
	92		7.55362e-08	6.71229e-09	7.74215e-07	1.95791e-07	0.148841	1.97046e+06	#NAME?	#NAME?	#NAME?	#NAME?	#NAME?	#NAME?	#NAME?	#NAME?	#NAME?	#NAME?	#NAME?	#NAME?	#NAME?	#NAME?	#NAME?	#NAME?	#NAME?	#NAME?	#NAME?	#NAME?	#NAME?	#NAME?	#NAME?	#NAME?	#NAME?
	93		6.35999e-08	5.50106e-09	6.69043e-07	1.69271e-07	0.141172	2.21968e+06	#NAME?	#NAME?	#NAME?	#NAME?	#NAME?	#NAME?	#NAME?	#NAME?	#NAME?	#NAME?	#NAME?	#NAME?	#NAME?	#NAME?	#NAME?	#NAME?	#NAME?	#NAME?	#NAME?	#NAME?	#NAME?	#NAME?	#NAME?	#NAME?	#NAME?
	94		5.35498e-08	4.50839e-09	5.78159e-07	1.46339e-07	0.133904	2.50055e+06	#NAME?	#NAME?	#NAME?	#NAME?	#NAME?	#NAME?	#NAME?	#NAME?	#NAME?	#NAME?	#NAME?	#NAME?	#NAME?	#NAME?	#NAME?	#NAME?	#NAME?	#NAME?	#NAME?	#NAME?	#NAME?	#NAME?	#NAME?	#NAME?	#NAME?
	95		4.50878e-08	3.69485e-09	4.99621e-07	1.26512e-07	0.127016	2.81707e+06	#NAME?	#NAME?	#NAME?	#NAME?	#NAME?	#NAME?	#NAME?	#NAME?	#NAME?	#NAME?	#NAME?	#NAME?	#NAME?	#NAME?	#NAME?	#NAME?	#NAME?	#NAME?	#NAME?	#NAME?	#NAME?	#NAME?	#NAME?	#NAME?	#NAME?
	96		3.7963e-08	3.02811e-09	4.31751e-07	1.09368e-07	0.120487	3.1738e+06	#NAME?	#NAME?	#NAME?	#NAME?	#NAME?	#NAME?	#NAME?	#NAME?	#NAME?	#NAME?	#NAME?	#NAME?	#NAME?	#NAME?	#NAME?	#NAME?	#NAME?	#NAME?	#NAME?	#NAME?	#NAME?	#NAME?	#NAME?	#NAME?	#NAME?
	97		3.19641e-08	2.48169e-09	3.73101e-07	9.45457e-08	0.114298	3.57584e+06	#NAME?	#NAME?	#NAME?	#NAME?	#NAME?	#NAME?	#NAME?	#NAME?	#NAME?	#NAME?	#NAME?	#NAME?	#NAME?	#NAME?	#NAME?	#NAME?	#NAME?	#NAME?	#NAME?	#NAME?	#NAME?	#NAME?	#NAME?	#NAME?	#NAME?
	98		2.69131e-08	2.03387e-09	3.22418e-07	8.17307e-08	0.108432	4.02896e+06	#NAME?	#NAME?	#NAME?	#NAME?	#NAME?	#NAME?	#NAME?	#NAME?	#NAME?	#NAME?	#NAME?	#NAME?	#NAME?	#NAME?	#NAME?	#NAME?	#NAME?	#NAME?	#NAME?	#NAME?	#NAME?	#NAME?	#NAME?	#NAME?	#NAME?
	99		2.26603e-08	1.66686e-09	2.7862e-07	7.06513e-08	0.10287	4.53967e+06	#NAME?	#NAME?	#NAME?	#NAME?	#NAME?	#NAME?	#NAME?	#NAME?	#NAME?	#NAME?	#NAME?	#NAME?	#NAME?	#NAME?	#NAME?	#NAME?	#NAME?	#NAME?	#NAME?	#NAME?	#NAME?	#NAME?	#NAME?	#NAME?	#NAME?
	100		1.90795e-08	1.36607e-09	2.40772e-07	6.10729e-08	0.0975969	5.11528e+06	#NAME?	#NAME?	#NAME?	#NAME?	#NAME?	#NAME?	#NAME?	#NAME?	#NAME?	#NAME?	#NAME?	#NAME?	#NAME?	#NAME?	#NAME?	#NAME?	#NAME?	#NAME?	#NAME?	#NAME?	#NAME?	#NAME?	#NAME?	#NAME?	#NAME?
	101		1.60645e-08	1.11956e-09	2.08065e-07	5.27921e-08	0.092597	5.76407e+06	#NAME?	#NAME?	#NAME?	#NAME?	#NAME?	#NAME?	#NAME?	#NAME?	#NAME?	#NAME?	#NAME?	#NAME?	#NAME?	#NAME?	#NAME?	#NAME?	#NAME?	#NAME?	#NAME?	#NAME?	#NAME?	#NAME?	#NAME?	#NAME?	#NAME?
	102		1.3526e-08	9.17539e-10	1.79801e-07	4.56335e-08	0.0878559	6.49534e+06	#NAME?	#NAME?	#NAME?	#NAME?	#NAME?	#NAME?	#NAME?	#NAME?	#NAME?	#NAME?	#NAME?	#NAME?	#NAME?	#NAME?	#NAME?	#NAME?	#NAME?	#NAME?	#NAME?	#NAME?	#NAME?	#NAME?	#NAME?	#NAME?	#NAME?
	103		1.13886e-08	7.51969e-10	1.55376e-07	3.94449e-08	0.08336	7.3196e+06	#NAME?	#NAME?	#NAME?	#NAME?	#NAME?	#NAME?	#NAME?	#NAME?	#NAME?	#NAME?	#NAME?	#NAME?	#NAME?	#NAME?	#NAME?	#NAME?	#NAME?	#NAME?	#NAME?	#NAME?	#NAME?	#NAME?	#NAME?	#NAME?	#NAME?
	104		9.58896e-09	6.16276e-10	1.3427e-07	3.40952e-08	0.0790963	8.24869e+06	#NAME?	#NAME?			0	#NAME?			0	#NAME?			0	#NAME?			0	#NAME?			0	#NAME?			0
	YLD										#NAME?	#NAME?	#NAME?		#NAME?	#NAME?	#NAME?		#NAME?	#NAME?	#NAME?		#NAME?	#NAME?	#NAME?		#NAME?	#NAME?	#NAME?		#NAME?	#NAME?	#NAME?
PICS
			SCENARIO 4A												SCENARIO 4B												SCENARIO 4C
			Scenario 4A_V (Vaccinated)						Scenario 4A_U (Unvaccinated)						Scenario 4B (Vaccinated)						Scenario 4B_U (Unvaccinated)						Scenario 4C (Vaccinated)						Scenario 4C_U (Unvaccinated)
			COVID INCIDENCE	PICS INCIDENCE	LE tables (Yrs)	Duration (days)	Incidence-per year	DALYS	COVID INCIDENCE	PICS INCIDENCE	LE tables (Yrs)	Duration (days)	Incidence-per year	DALYS	COVID INCIDENCE	PICS INCIDENCE	LE tables (Yrs)	Duration (days)	Incidence-per year	DALYS	COVID INCIDENCE	PICS INCIDENCE	LE tables (Yrs)	Duration (days)	Incidence-per year	DALYS	COVID INCIDENCE	PICS INCIDENCE	LE tables (Yrs)	Duration (days)	Incidence-per year	DALYS	COVID INCIDENCE	PICS INCIDENCE	LE tables (Yrs)	Duration (days)	Incidence-per year	DALYS
	60-69		0.971818	0.880467	21.403	7803.43	18.8108	#NAME?	1.21477	1.10058	21.403	7803.43	23.5136	#NAME?	12.6336	11.4461	21.403	7803.43	244.541	#NAME?	14.3343	12.9869	21.403	7803.43	277.46	#NAME?	63.1681	57.2303	21.403	7803.43	1222.7	#NAME?	72.4004	65.5948	21.403	7803.43	1401.41	#NAME?
	70-79		0.444929	0.403105	13.4485	4898.07	5.40571	#NAME?	0.556161	0.503882	13.4485	4898.07	6.75714	#NAME?	5.78407	5.24037	13.4485	4898.07	70.2742	#NAME?	6.5627	5.9458	13.4485	4898.07	79.7342	#NAME?	28.9204	26.2018	13.4485	4898.07	351.371	#NAME?	33.1472	30.0313	13.4485	4898.07	402.725	#NAME?
	80-89		0.105378	0.0954723	7.10454	2580.93	0.674627	#NAME?	0.131722	0.11934	7.10454	2580.93	0.843284	#NAME?	1.36991	1.24114	7.10454	2580.93	8.77015	#NAME?	1.55432	1.40822	7.10454	2580.93	9.95075	#NAME?	6.84956	6.2057	7.10454	2580.93	43.8508	#NAME?	7.85065	7.11269	7.10454	2580.93	50.2597	#NAME?
	90+		0	0	3.45069	1246.36	0	#NAME?	0	0	3.45069	1246.36	0	#NAME?	0	0	3.45069	1246.36	0	#NAME?	0	0	3.45069	1246.36	0	#NAME?	0	0	3.45069	1246.36	0	#NAME?	0	0	3.45069	1246.36	0	#NAME?
	TOTAL		1.52212	1.37904			24.8912	#NAME?	1.90265	1.72381			31.114	#NAME?	19.7876	17.9276			323.585	#NAME?	22.4513	20.3409			367.145	#NAME?	98.9381	89.6379			1617.93	#NAME?	113.398	102.739			1854.39	#NAME?
Permanent
					SCENARIO 4A				SCENARIO 4B				SCENARIO 4C
					Scenario IA (Vaccinated)		Scenario IA (UNVaccinated)		Scenario IB (Vaccinated)		Scenario IB (UNVaccinated)		Scenario IC (Vaccinated)		Scenario IC (UNVaccinated)
			IHME 2019		COVID-19 consequences		COVID-19 consequences		COVID-19 consequences		COVID-19 consequences		COVID-19 consequences		COVID-19 consequences
					Base		Base		Base		Base		Base		Base
			Incidence Base	DALYS Base	Incidence	DALYS	Incidence	DALYS	Incidence	DALYS	Incidence	DALYS	Incidence	DALYS	Incidence	DALYS
1	Diabetes	587	69042.8	186528	#NAME?	#NAME?	#NAME?	#NAME?	#NAME?	#NAME?	#NAME?	#NAME?	#NAME?	#NAME?	#NAME?	#NAME?
2	Parkinsons	544	6598.01	38742.5	#NAME?	#NAME?	#NAME?	#NAME?	#NAME?	#NAME?	#NAME?	#NAME?	#NAME?	#NAME?	#NAME?	#NAME?
3	Dementia	543	43968.6	154293	#NAME?	#NAME?	#NAME?	#NAME?	#NAME?	#NAME?	#NAME?	#NAME?	#NAME?	#NAME?	#NAME?	#NAME?
4	Anxiety disorders	571	188750	139108	#NAME?	#NAME?	#NAME?	#NAME?	#NAME?	#NAME?	#NAME?	#NAME?	#NAME?	#NAME?	#NAME?	#NAME?
5	Ischemic Stroke	495	17984.1	114238	#NAME?	#NAME?	#NAME?	#NAME?	#NAME?	#NAME?	#NAME?	#NAME?	#NAME?	#NAME?	#NAME?	#NAME?
	Total with Diabetes					#NAME?		#NAME?		#NAME?		#NAME?		#NAME?		#NAME?
	Total without Diabetes					#NAME?		#NAME?		#NAME?		#NAME?		#NAME?		#NAME?
DALYS
			Scenario 4A_V (Vaccinated)							Scenario 4A_U (Unvaccinated)							Scenario 4B_V (Vaccinated)							Scenario 4B_U (Unvaccinated)							Scenario 4C_V (Vaccinated)							Scenario 4C_U (Unvaccinated)
			TOTAL DALYS				ERRUNOUTPUT			TOTAL DALYS				ERRUNOUTPUT			TOTAL DALYS				ERRUNOUTPUT			TOTAL DALYS				ERRUNOUTPUT			TOTAL DALYS				ERRUNOUTPUT			TOTAL DALYS				ERRUNOUTPUT
			YLL	YLD (Base)	DALYS	DALYS per 100,000 population				YLL	YLD (Base)	DALYS	DALYS per 100,000 population				YLL	YLD (Base)	DALYS	DALYS per 100,000 population				YLL	YLD (Base)	DALYS	DALYS per 100,000 population				YLL	YLD (Base)	DALYS	DALYS per 100,000 population				YLL	YLD (Base)	DALYS	DALYS per 100,000 population
	YLL_4AV_N		83.5293				#NAME?		YLL_4AU_N	198.382				#NAME?		YLL_4BV_N	1200.73				#NAME?		YLL_4BU_N	2704.26				#NAME?		YLL_4CV_N	5387.64				#NAME?		YLL_4CU_N	12132.6				#NAME?
	YLD_Acute_4AV_N			#NAME?			#NAME?		YLD_Acute_4AU_N		#NAME?			#NAME?		YLD_Acute_4BV_N		#NAME?			#NAME?		YLD_Acute_4BU_N		#NAME?			#NAME?		YLD_Acute_4CV_N		#NAME?			#NAME?		YLD_Acute_4CU_N		#NAME?			#NAME?
	YLD_Chronic_4AV_N			#NAME?			#NAME?		YLD_Chronic_4AU_N		#NAME?			#NAME?		YLD_Chronic_4BV_N		#NAME?			#NAME?		YLD_Chronic_4BU_N		#NAME?			#NAME?		YLD_Chronic_4CV_N		#NAME?			#NAME?		YLD_Chronic_4CU_N		#NAME?			#NAME?
	YLD_PICS_4AV_N			#NAME?			#NAME?		YLD_PICS_4AU_N		#NAME?			#NAME?		YLD_PICS_4BV_N		#NAME?			#NAME?		YLD_PICS_4BU_N		#NAME?			#NAME?		YLD_PICS_4CV_N		#NAME?			#NAME?		YLD_PICS_4CU_N		#NAME?			#NAME?
	DALY_Perm_Diab_4AV_N			#NAME?			#NAME?		DALY_Perm_Diab_4AU_N		#NAME?			#NAME?		DALY_Perm_Diab_4BV_N		#NAME?			#NAME?		DALY_Perm_Diab_4BU_N		#NAME?			#NAME?		DALY_Perm_Diab_4CV_N		#NAME?			#NAME?		DALY_Perm_Diab_4CU_N		#NAME?			#NAME?
	DALY_Perm_WoDiab_4AV_N			#NAME?			#NAME?		DALY_Perm_WoDiab_4AU_N		#NAME?			#NAME?		DALY_Perm_WoDiab_4BV_N		#NAME?			#NAME?		DALY_Perm_WoDiab_4BU_N		#NAME?			#NAME?		DALY_Perm_WoDiab_4CV_N		#NAME?			#NAME?		DALY_Perm_WoDiab_4CU_N		#NAME?			#NAME?
	TOTAL YLD Baseline_4AV_N			#NAME?		#NAME?	#NAME?		TOTAL YLD Baseline_4AU_N		#NAME?		#NAME?	#NAME?		TOTAL YLD Baseline_4BV_N		#NAME?		#NAME?	#NAME?		TOTAL YLD Baseline_4BU_N		#NAME?		#NAME?	#NAME?		TOTAL YLD Baseline_4CV_N		#NAME?		#NAME?	#NAME?		TOTAL YLD Baseline_4CU_N		#NAME?		#NAME?	#NAME?
	TOTAL YLD with Diabetes_4AV_N			#NAME?		#NAME?	#NAME?		TOTAL YLD with Diabetes_4AU_N		#NAME?		#NAME?	#NAME?		TOTAL YLD with Diabetes_4BV_N		#NAME?		#NAME?	#NAME?		TOTAL YLD with Diabetes_4BU_N		#NAME?		#NAME?	#NAME?		TOTAL YLD with Diabetes_4CV_N		#NAME?		#NAME?	#NAME?		TOTAL YLD with Diabetes_4CU_N		#NAME?		#NAME?	#NAME?
	TOTAL YLD without Diabetes_4AV_N			#NAME?		#NAME?	#NAME?		TOTAL YLD without Diabetes_4AU_N		#NAME?		#NAME?	#NAME?		TOTAL YLD without Diabetes_4BV_N		#NAME?		#NAME?	#NAME?		TOTAL YLD without Diabetes_4BU_N		#NAME?		#NAME?	#NAME?		TOTAL YLD without Diabetes_4CV_N		#NAME?		#NAME?	#NAME?		TOTAL YLD without Diabetes_4CU_N		#NAME?		#NAME?	#NAME?
	TOTAL DALYS Baseline_4AV_N				#NAME?	#NAME?	#NAME?		TOTAL DALYS Baseline_4AU_N			#NAME?	#NAME?	#NAME?		TOTAL DALYS Baseline_4BV_N			#NAME?	#NAME?	#NAME?		TOTAL DALYS Baseline_4BU_N			#NAME?	#NAME?	#NAME?		TOTAL DALYS Baseline_4CV_N			#NAME?	#NAME?	#NAME?		TOTAL DALYS Baseline_4CU_N			#NAME?	#NAME?	#NAME?
	Total DALY_D_4AV_N				#NAME?	#NAME?	#NAME?		Total DALY_D_4AU_N			#NAME?	#NAME?	#NAME?		Total DALY_D_4BV_N			#NAME?	#NAME?	#NAME?		Total DALY_D_4BU_N			#NAME?	#NAME?	#NAME?		Total DALY_D_4CV_N			#NAME?	#NAME?	#NAME?		Total DALY_D_4CU_N			#NAME?	#NAME?	#NAME?
	Total DALYS_WoD_4AV_N				#NAME?	#NAME?	#NAME?		Total DALYS_WoD_4AU_N			#NAME?	#NAME?	#NAME?		Total DALYS_WoD_4BV_N			#NAME?	#NAME?	#NAME?		Total DALYS_WoD_4BU_N			#NAME?	#NAME?	#NAME?		Total DALYS_WoD_4CV_N			#NAME?	#NAME?	#NAME?		Total DALYS_WoD_4CU_N			#NAME?	#NAME?	#NAME?
			Scenario 4A_Combined													Scenario 4B_Combined														Scenario 4C_Combined
			TOTAL DALYS				ERRUNOUTPUT										TOTAL DALYS				ERRUNOUTPUT										TOTAL DALYS				ERRUNOUTPUT
			YLL	YLD (Base)	DALYS	DALYS per 100,000 population											YLL	YLD (Base)	DALYS	DALYS per 100,000 population											YLL	YLD (Base)	DALYS	DALYS per 100,000 population
	YLL_4A_Combined_NSW		#NAME?				#NAME?									YLL_4B_Combined_NSW	#NAME?				#NAME?									YLL_4C_Combined_NSW	#NAME?				#NAME?
	YLD_Acute_4A_Combined_NSW			#NAME?			#NAME?									YLD_Acute_4B_Combined_NSW		#NAME?			#NAME?									YLD_Acute_4C_Combined_NSW		#NAME?			#NAME?
	YLD_Chronic_4A_Combined_NSW			#NAME?			#NAME?									YLD_Chronic_4B_Combined_NSW		#NAME?			#NAME?									YLD_Chronic_4C_Combined_NSW		#NAME?			#NAME?
	YLD_PICS_4A_Combined_NSW			#NAME?			#NAME?									YLD_PICS_4B_Combined_NSW		#NAME?			#NAME?									YLD_PICS_4C_Combined_NSW		#NAME?			#NAME?
	DALY_Perm_Diab_4A_Combined_NSW			#NAME?			#NAME?									DALY_Perm_Diab_4B_Combined_NSW		#NAME?			#NAME?									DALY_Perm_Diab_4C_Combined_NSW		#NAME?			#NAME?
	DALY_Perm_WoDiab_4A_Combined_NSW			#NAME?			#NAME?									DALY_Perm_WoDiab_4B_Combined_NSW		#NAME?			#NAME?									DALY_Perm_WoDiab_4C_Combined_NSW		#NAME?			#NAME?
	TOTAL YLD Baseline_4A_Combined_NSW			#NAME?		#NAME?	#NAME?									TOTAL YLD Baseline_4B_Combined_NSW		#NAME?		#NAME?	#NAME?									TOTAL YLD Baseline_4C_Combined_NSW		#NAME?		#NAME?	#NAME?
	TOTAL YLD with Diabetes_4A_Combined_NSW			#NAME?		#NAME?	#NAME?									TOTAL YLD with Diabetes_4B_Combined_NSW		#NAME?		#NAME?	#NAME?									TOTAL YLD with Diabetes_4C_Combined_NSW		#NAME?		#NAME?	#NAME?
	TOTAL YLD without Diabetes_4A_Combined_NSW			#NAME?		#NAME?	#NAME?									TOTAL YLD without Diabetes_4B_Combined_NSW		#NAME?		#NAME?	#NAME?									TOTAL YLD without Diabetes_4C_Combined_NSW		#NAME?		#NAME?	#NAME?
	TOTAL DALYS Baseline_4A_Combined_NSW				#NAME?	#NAME?	#NAME?									TOTAL DALYS Baseline_4B_Combined_NSW			#NAME?	#NAME?	#NAME?									TOTAL DALYS Baseline_4C_Combined_NSW			#NAME?	#NAME?	#NAME?
	Total DALY_D_4A_Combined_NSW				#NAME?	#NAME?	#NAME?									Total DALY_D_4B_Combined_NSW			#NAME?	#NAME?	#NAME?									Total DALY_D_4C_Combined_NSW			#NAME?	#NAME?	#NAME?
	Total DALYS_WoD_4A_Combined_NSW				#NAME?	#NAME?	#NAME?									Total DALYS_WoD_4B_Combined_NSW			#NAME?	#NAME?	#NAME?									Total DALYS_WoD_4C_Combined_NSW			#NAME?	#NAME?	#NAME?

## Sheet: DALYS Australia Base
DALYS Calculation (Base)
Back to "read me"
Mortality (YLL)
	Age	Mid	Age at Death Male (%)	Age at Death Female (%)	Age at Death Total (%)	Death in Males	Death in Females	Death in Totals	LE Male	LE Female	LETotals	YLL (LEMales)	YLL (LEFemales)	YLL (Totals)	YLL (LEMales) per 100,000	YLL (LEFemales) per 100,000	YLL (Totals) per 100,000
	0-9	5	0	0	0	0	0	0	76.1954	80.3382	78.2138	0	0	0	0	0	0
	10-19	15	0	0	0	0	0	0	66.2611	70.3967	68.2659	0	0	0	0	0	0
	20-29	25	0.00227273	0	0.00110011	1	0	1	56.5676	60.5384	58.5115	56.5676	0	58.5115	0.220155	0	0.227721
	30-39	35	0.00454545	0	0.00220022	2	0	2	46.9571	50.7135	48.8546	93.9142	0	97.7091	0.365505	0	0.380274
	40-49	45	0.00454545	0	0.00220022	2	0	2	37.5272	41.0525	39.3018	75.0545	0	78.6035	0.292105	0	0.305917
	50-59	55	0.0227273	0.010661	0.0165017	10	5	15	28.4549	31.6699	30.0933	284.549	158.349	451.399	1.10744	0.61628	1.7568
	60-69	65	0.0590909	0.0255864	0.0418042	26	12	38	20.0079	22.704	21.403	520.204	272.448	813.312	2.02458	1.06034	3.16533
	70-79	75	0.229545	0.119403	0.172717	101	56	157	12.4209	14.4136	13.4485	1254.51	807.163	2111.41	4.88242	3.1414	8.21741
	80-89	85	0.415909	0.41791	0.416942	183	196	379	6.44105	7.57054	7.10454	1178.71	1483.83	2692.62	4.58743	5.7749	10.4794
	90-100	95	0.261364	0.426439	0.346535	115	200	315	3.17827	3.56344	3.45069	365.501	712.688	1086.97	1.42249	2.77371	4.23036
	weighted mean/Total		1	1	1	440	469	909	8.7023	7.32297	8.1304	3829.01	3434.47	7390.54	14.9021	13.3666	28.7632
Morbidity
PARAMETERS			Baseline
AUSTALIAN POPULATION			Actual
Australian COVID case (1 year without death)			27787
Australian poulation as of 31Dec2020 (e)			25694393
Australian COVID case (1year)			28696
Ausrtalian COVID cases (10 and above)			26038.9
Australian COVID cases (Hosp without death; >30 years old)			2756.4
YEAR			365.25
DISABILITY WEIGHTS (g)			MID	LL	UL
DW(Moderate)			0.051	0.032	0.074
DW(Severe)			0.133	0.088	0.19
DW(Critical)			0.655	0.579	0.727
DW(Chronic)			0.219	0.148	0.308
DW(Afib as proxy for PICS) (i)			0.224	0.151	0.312
SEVERITY DISTRIBUTION
ACUTE (Proportion)			%	SA**(j)	SA** (j)		Duration (days)
N Asymptomatic (will not be added in the YLD) (h)			0.17	0.1285	0.087		14
N(Moderate) (a)			0.709902	0.745397	0.780892		14
N(Severe) (a)			0.100714	0.105749	0.110785		14
N(Critical)* (a)			0.0193842	0.0203534	0.0213226		14
CHRONIC			%	LL	UL	Ref	Duration (days)
Post (acute) after symptomatic duration to 2 years			See ONS Post-Acute Sheet
Post-intesive care syndrome			%	LL	UL	Ref	Duration (days)
1) PICS			0.906				RLE
Permanent functional impairment			%				Years
2) Diabetes			0.0282921	0.0256649	0.0312028		RLE
3) Parkinsons			0.0011	0.00079	0.0014		RLE
4) Dementia			0.0067	0.0059	0.0075		RLE
5) Anxiety Disorders			0.0711	0.0682	0.0741		RLE
5) Ischaemic Stroke			0.0076	0.0068	0.0085		RLE
MORBIDITY CALCULATION (Per age group)
ACUTE
									Per DALYS			Per 100,000 DALYS
			Moderate		Severe		Critical		Moderate	Severe	Critical	Moderate	Severe	Critical
	Age		Incidence	Case-Person Year (Base)	Incidence	Case-Person Year (Base)	Incidence	Case-Person Year (Base)	YLD (Base)	YLD (Base)	YLD (Base)	YLD (Base)	YLD (Base)	YLD (Base)
	0-9		1203.68	46.1371	40.678	1.55918	3.12908	0.119937	2.35299	0.207371	0.0785589	0.0091576	0.000807069	0.000305743
	10-19		2000.71	76.6871	29.4162	1.12752	4.20231	0.161074	3.91104	0.14996	0.105504	0.0152214	0.00058363	0.00041061
	20-29		5165.48	197.992	169.956	6.5144	22.2165	0.851556	10.0976	0.866416	0.557769	0.0392989	0.003372	0.00217078
	30-39		3991.95	153.011	197.602	7.57409	39.2959	1.50621	7.80357	1.00735	0.986568	0.0303707	0.00392052	0.00383962
	40-49		2776.41	106.42	242.83	9.30767	56.7361	2.17469	5.4274	1.23792	1.42442	0.0211229	0.00481786	0.0055437
	50-59		2385.2	91.4244	309.465	11.8618	124.018	4.75359	4.66264	1.57761	3.1136	0.0181465	0.00613992	0.0121178
	60-69		1474.73	56.5263	392.36	15.0391	142.339	5.45584	2.88284	2.00021	3.57357	0.0112197	0.0077846	0.013908
	70-79		710.594	27.237	499.683	19.1528	127.683	4.89408	1.38909	2.54732	3.20563	0.00540619	0.00991393	0.012476
	80-89		374.615	14.359	649.034	24.8774	34.6012	1.32626	0.732307	3.30869	0.8687	0.00285007	0.0128771	0.00338089
	90-100		287.981	11.0383	359.051	13.7624	2.02853	0.0777535	0.562952	1.8304	0.0509286	0.00219095	0.00712372	0.000198209
	Total		20371.4	780.832	2890.08	110.776	556.249	21.321	39.8224	14.7333	13.9652	0.154985	0.0573403	0.0543514
Morbidity calculation (Total incidence cases/Checking/Scenario analysis)
			Cases (28,696)	Case (Person - years)	YLD
			Base	Base	Base DL
	Moderate		20371.4	780.832	39.8224
	Severe		2890.08	110.776	14.7333
	Critical		556.249	21.321	13.9652
	TOTAL				68.5209
CHRONIC/LONG COVID
			CHRONIC
				Baseline Prevalence				LL Prevalence	UL Prevalence
	weeks		Baseline	Recalculation (mutually exclusive)	Incidence	DALYs/year	DALYS per 100,000	LL	UL
	0		0.3111	0.0184099	506.871	2.13471	0.00830806	0.2887	0.3358
	1		0.29269	0.0173205	476.876	4.01676	0.0156328	0.268376	0.319742
	2		0.27537	0.0162955	448.656	5.66859	0.0220616	0.249482	0.304453
	3		0.259074	0.0153312	422.106	7.11086	0.0276748	0.231919	0.289894
	4		0.243743	0.0144239	397.127	8.36258	0.0325463	0.215592	0.276032
	5		0.229319	0.0135704	373.626	9.44125	0.0367444	0.200415	0.262832
	6		0.215749	0.0127673	351.516	10.363	0.0403316	0.186306	0.250264
	7		0.202981	0.0120118	330.715	11.1425	0.0433657	0.17319	0.238297
	8		0.19097	0.011301	311.144	11.7936	0.0458993	0.160997	0.226901
	9		0.179669	0.0106322	292.732	12.3285	0.0479813	0.149663	0.216051
	10		0.169036	0.010003	275.409	12.7588	0.0496561	0.139127	0.20572
	11		0.159033	0.00941108	259.111	13.0951	0.0509647	0.129333	0.195883
	12		0.149622	0.00885417	243.778	13.3468	0.0519445	0.120228	0.186516
	13		0.140768	0.0083302	229.352	13.5229	0.0526298	0.111764	0.177597
	14		0.132438	0.00783725	215.779	13.6314	0.0530522	0.103896	0.169104
	15		0.124601	0.00737347	203.01	13.6798	0.0532403	0.0965816	0.161018
	16		0.117227	0.00693713	190.997	13.6746	0.0532203	0.0897823	0.153318
	17		0.11029	0.00652661	179.694	13.6222	0.0530162	0.0834617	0.145987
	18		0.103764	0.00614039	169.06	13.5281	0.0526499	0.0775861	0.139006
	19		0.0976231	0.00577702	159.056	13.3974	0.0521414	0.0721241	0.132359
	20		0.0918461	0.00543515	149.22	13.1973	0.0513627	0.0670466	0.126029
	21		0.086411	0.00511352	140.389	13.0076	0.0506243	0.0623266	0.120003
	22		0.0812974	0.00481092	132.082	12.7941	0.0497935	0.0579388	0.114264
	23		0.0764865	0.00452622	124.265	12.5604	0.0488837	0.05386	0.1088
	24		0.0719603	0.00425838	116.912	12.3095	0.0479072	0.0500683	0.103598
	25		0.0677019	0.00400638	109.993	12.0443	0.0468751	0.0465435	0.0986438
	26		0.0636955	0.0037693	94.9944	10.802	0.0420402	0.0432669	0.0939268
	27		0.0599262	0.00354624	89.373	10.5391	0.0410173	0.040221	0.0894353
	28		0.05638	0.00333639	84.0842	10.2696	0.0399682	0.0373894	0.0851586
	29		0.0530436	0.00313895	79.1083	9.99503	0.0388997	0.0347572	0.0810864
	30		0.0499047	0.0029532	74.427	9.71701	0.0378176	0.0323104	0.077209
	31		0.0469515	0.00277844	70.0226	9.43689	0.0367274	0.0300357	0.0735169
	32		0.044173	0.00261402	65.8789	9.1559	0.0356338	0.0279213	0.0700014
	33		0.041559	0.00245933	61.9804	8.87512	0.0345411	0.0259556	0.066654
	34		0.0390997	0.00231379	58.3126	8.5955	0.0334528	0.0241284	0.0634667
	35		0.0367859	0.00217687	54.8619	8.3179	0.0323724	0.0224297	0.0604318
	36		0.034609	0.00204805	51.6153	8.04305	0.0313028	0.0208507	0.057542
	37		0.032561	0.00192685	48.5609	7.77161	0.0302463	0.0193828	0.0547904
	38		0.0306341	0.00181283	45.6872	7.50412	0.0292053	0.0180183	0.0521704
	39		0.0288213	0.00170555	42.9836	7.24108	0.0281816	0.0167498	0.0496757
	40		0.0271157	0.00160462	40.44	6.98289	0.0271767	0.0155707	0.0473003
	41		0.0255111	0.00150967	38.0468	6.7299	0.0261921	0.0144745	0.0450384
	42		0.0240015	0.00142033	35.7954	6.4824	0.0252289	0.0134555	0.0428847
	43		0.0225811	0.00133628	33.6771	6.24063	0.0242879	0.0125082	0.040834
	44		0.0212448	0.0012572	31.6842	6.00477	0.0233699	0.0116277	0.0388814
	45		0.0199876	0.0011828	29.8092	5.77497	0.0224756	0.0108091	0.0370221
	46		0.0188048	0.00111281	28.0452	5.55134	0.0216052	0.0100481	0.0352518
	47		0.017692	0.00104696	26.3856	5.33395	0.0207592	0.00934076	0.0335661
	48		0.0166451	0.000985002	24.8242	5.12285	0.0199376	0.00868318	0.031961
	49		0.0156601	0.000926712	23.3552	4.91806	0.0191406	0.00807189	0.0304326
	50		0.0147334	0.000871873	21.9731	4.71957	0.0183681	0.00750364	0.0289774
	51		0.0138615	0.000820278	20.6728	4.52734	0.01762	0.00697539	0.0275917
	52		0.0130412	0.000771737	19.4494	4.34134	0.0168961	0.00648433	0.0262723
	53		0.0122695	0.000726068	18.2985	4.1615	0.0161961	0.00602784	0.025016
	54		0.0115434	0.000683101	17.2156	3.98774	0.0155199	0.00560348	0.0238198
	55		0.0108603	0.000642678	16.1969	3.81997	0.0148669	0.005209	0.0226807
	56		0.0102176	0.000604646	15.2384	3.65809	0.0142369	0.00484229	0.0215962
	57		0.00961298	0.000568865	14.3366	3.502	0.0136294	0.0045014	0.0205635
	58		0.00904412	0.000535201	13.4882	3.35157	0.013044	0.0041845	0.0195801
	59		0.00850891	0.00050353	12.6901	3.20668	0.0124801	0.00388992	0.0186438
	60		0.00800538	0.000473733	11.9391	3.0672	0.0119372	0.00361607	0.0177523
	61		0.00753165	0.000445699	11.2326	2.933	0.0114149	0.0033615	0.0169034
	62		0.00708595	0.000419324	10.5679	2.80394	0.0109127	0.00312486	0.0160951
	63		0.00666663	0.00039451	9.9425	2.67989	0.0104298	0.00290487	0.0153255
	64		0.00627212	0.000371164	9.35413	2.56069	0.00996596	0.00270037	0.0145926
	65		0.00590096	0.000349199	8.80059	2.44622	0.00952046	0.00251026	0.0138948
	66		0.00555176	0.000328535	8.2798	2.33634	0.00909278	0.00233354	0.0132304
	67		0.00522322	0.000309093	7.78982	2.23089	0.00868238	0.00216926	0.0125977
	68		0.00491413	0.000290802	7.32885	2.12973	0.00828871	0.00201655	0.0119953
	69		0.00462333	0.000273593	6.89515	2.03274	0.00791123	0.00187459	0.0114217
	70		0.00434973	0.000257403	6.48712	1.93977	0.0075494	0.00174262	0.0108755
	71		0.00409233	0.000242171	6.10323	1.85069	0.00720269	0.00161994	0.0103555
	72		0.00385016	0.00022784	5.74206	1.76535	0.00687058	0.0015059	0.00986029
	73		0.00362232	0.000214357	5.40226	1.68364	0.00655254	0.00139988	0.00938878
	74		0.00340796	0.000201672	5.08258	1.60541	0.00624809	0.00130133	0.00893982
	75		0.00320629	0.000189738	4.78181	1.53055	0.00595673	0.00120972	0.00851233
	76		0.00301655	0.00017851	4.49883	1.45892	0.00567797	0.00112456	0.00810528
	77		0.00283804	0.000167946	4.23261	1.39041	0.00541134	0.00104539	0.0077177
	78		0.0026701	0.000158008	3.98214	1.3249	0.00515639	0.000971794	0.00734864
	79		0.00251209	0.000148657	3.74649	1.26228	0.00491266	0.00090338	0.00699724
	80		0.00236343	0.00013986	3.52478	1.20242	0.00467972	0.000839783	0.00666264
	81		0.00222357	0.000131584	3.3162	1.14524	0.00445714	0.000780663	0.00634404
	82		0.00209199	0.000123797	3.11995	1.0906	0.00424452	0.000725705	0.00604067
	83		0.00196819	0.000116471	2.93533	1.03843	0.00404146	0.000674616	0.00575182
	84		0.00185172	0.000109579	2.76162	0.988608	0.00384756	0.000627123	0.00547677
	85		0.00174214	0.000103094	2.5982	0.941047	0.00366246	0.000582974	0.00521488
	86		0.00163905	9.69934e-05	2.44445	0.895654	0.0034858	0.000541934	0.00496551
	87		0.00154205	9.12537e-05	2.29979	0.852338	0.00331721	0.000503782	0.00472806
	88		0.0014508	8.58536e-05	2.1637	0.811012	0.00315638	0.000468316	0.00450197
	89		0.00136495	8.0773e-05	2.03566	0.771592	0.00300296	0.000435347	0.00428669
	90		0.00128417	7.59932e-05	1.91519	0.733998	0.00285665	0.000404699	0.00408171
	91		0.00120818	7.14961e-05	1.80186	0.698151	0.00271713	0.000376208	0.00388653
	92		0.00113668	6.72652e-05	1.69523	0.663976	0.00258413	0.000349724	0.00370068
	93		0.00106942	6.32847e-05	1.59491	0.631401	0.00245735	0.000325103	0.00352371
	94		0.00100613	5.95397e-05	1.50053	0.600356	0.00233653	0.000302216	0.00335521
	95		0.000946593	5.60163e-05	1.41173	0.570775	0.0022214	0.000280941	0.00319477
	96		0.000890577	5.27015e-05	1.32819	0.542592	0.00211171	0.000261163	0.003042
	97		0.000837876	4.95828e-05	1.24959	0.515746	0.00200723	0.000242777	0.00289654
	98		0.000788293	4.66486e-05	1.17565	0.490177	0.00190772	0.000225686	0.00275803
	99		0.000741644	4.38881e-05	1.10608	0.465828	0.00181296	0.000209798	0.00262614
	100		0.000697756	4.12909e-05	1.04062	0.442644	0.00172273	0.000195028	0.00250056
	101		0.000656465	3.88475e-05	0.979041	0.420573	0.00163683	0.000181298	0.00238099
	102		0.000617618	3.65486e-05	0.921105	0.399565	0.00155507	0.000168535	0.00226713
	103		0.000581069	3.43858e-05	0.866597	0.379569	0.00147725	0.00015667	0.00215872
	104		0.000546683	0.000546683			0	0.000145641	0.00205549
	YLD				6968.56	563.719	2.19394
PICS
			COVID INCIDENCE	PICS INCIDENCE	LE tables (Yrs)	Duration (days)	Incidence-per year	DALYS
	60-69		140.105	126.935	21.403	7803.43	2711.92	607.47
	70-79		115.248	104.414	13.4485	4898.07	1400.21	313.648
	80-89		24.3158	22.0301	7.10454	2580.93	155.669	34.8699
	90+		1.21141	1.09754	3.45069	1246.36	3.7452	0.838925
	TOTAL			254.477			4271.55	956.826
Permanent
			IHME 2019		COVID-19 consequences
					Base
			Incidence	DALYS	Incidence	DALYS
1	Diabetes	587	69042.8	186528	77.9843	210.685
2	Parkinsons	544	6598.01	38742.5	28.6428	168.186
3	Dementia	543	43968.6	154293	174.461	612.212
4	Anxiety disorders	571	188750	139108	1851.37	1364.45
5	Ischemic Stroke	495	17984.1	114238	197.896	1257.07
	Total with Diabetes					3612.6
	Total without Diabetes					3401.92
DALYS
			TOTAL DALYS
			YLL	YLD (Base)	DALYS	DALYS per 100,000 population
	YLL		7263.49
	Acute			68.5209
	Chronic			563.719
	PICS			956.826
	Permanent with Diabets			3612.6
	Permanent without Diabets			3401.92
	TOTAL YLD Baseline			1589.07		6.18449
	TOTAL YLD with Diabetes			5201.67		20.2444
	TOTAL YLD without Diabetes			4990.98		19.4244
	DALYS Baseline				8852.55	34.4532
	BASE Total (with Diabetes)				12465.2	48.5131
	BASE Total (without Diabetes)				12254.5	47.6932

[truncated: 17 more sheets: DALYS Australia Sensitivity_ONS, DALYS Australia Sensitivity 28d, DALYS Australia Sensitivity NSW, Results and analysis in pap, Long COVID Analysis, Ersatz raw Base, Ersatz raw 5%, Ersatz result , Ersazt raw result 10%, Doherty Data , Dohertyadjusted, AusLT17-19, AgeDCovid, AusCOVID Cases_update, ONS Post Acute, NSW Post Acute , Permanent Disb]
