# Supplementary material for: Modelling the Potential Acute and Post-Acute Burden of COVID-19 Under the Australian Border Re-Opening Plan
Source: Research Square preprint supplement (doi:10.21203/rs.3.rs-1066181/v1), 2021-11-30
Supplement: Supplementary file [file 7d5a9f304605ac603045eee3.pdf]

Additional file 3. Model Test inputs using the actual COVID-19 cases for 2020. This file shows the inputs and results used for the DALY model test

**Table 1. Model tests input using the Actual COVID-19 cases from January 2020- January 2021**

| <b>Health States</b>                | <b>Rates (Sensitivity analysis)</b>                                         | <b>Duration (Sensitivity Analysis)</b>                     | <b>DW (Uncertainty Analysis)</b> |
|-------------------------------------|-----------------------------------------------------------------------------|------------------------------------------------------------|----------------------------------|
| Asymptomatic                        | 17% of the moderate cases[1]                                                | Nil                                                        | Nil                              |
| Moderate                            | 71.0% (Increased to 5% and 10%) to the whole Australian COVID-19 case[2, 3] | 14 days (28 days)[4-6]                                     | 0.051 (0.032 – 0.074)*[7, 8]     |
| Severe                              | 10.1% (Increased to 5% and 10%) to the whole Australian COVID-19 case[2, 3] | 14 days (28 days)[4-6]                                     | 0.133 (0.088 – 0.190)*[7, 8]     |
| Critical                            | 1.9% (Increased to 5% and 10%) to the whole Australian COVID-19 case[2, 3]  | 14 days (28 days)[4-6]                                     | 0.655 (0.579 – 0.727)*[7, 8]     |
| Post-acute consequences (ONS)       | Start at 25.91% (23.2% to 29.0%) 2 weeks after initial COVID infection[9]   | 14 days to 2 years (28 days to 2 years) (assumed)          | 0.219 (0.148-0.308)[7, 8]        |
| Post-acute consequences (NSW)       | Start at 33.60% (33.0% to 34.0%%) 2 weeks after initial COVID infection[10] | 14 days to 2 years (28 days to 2 years) (assumed)          | 0.219 (0.148-0.308)[7, 8]        |
| Post-Intensive Care Syndrome (PICS) | 90.6% of ICU survivors[11]                                                  | 14 days (28 days) to remaining lifetime expectancy[12, 13] | 0.224 (0.151-0.312)* (a)[14, 15] |
| Permanent disability health states  | Same as additional file 2 Table 4                                           |                                                            |                                  |

**Table 2. Actual COVID-19 cases**

| <b>Actual COVID-19 reported cases between January 2020 to 17 January 2021</b> |                  |        |        |                 |                     |
|-------------------------------------------------------------------------------|------------------|--------|--------|-----------------|---------------------|
| Age Group                                                                     | Cumulative Cases |        |        |                 |                     |
|                                                                               | Cases            |        |        | Number of Death | Cases without death |
|                                                                               | Male             | Female | People | People          | People              |
| 0 to 9                                                                        | 792              | 711    | 1,503  | 0               | 1,503               |
| 10 to 19                                                                      | 1,254            | 1,197  | 2,451  | 0               | 2,451               |
| 20 to 29                                                                      | 3,067            | 3,366  | 6,455  | 1               | 6,454               |
| 30 to 39                                                                      | 2,587            | 2,493  | 5,095  | 2               | 5,093               |
| 40 to 49                                                                      | 1,890            | 1,788  | 3,706  | 2               | 3,704               |
| 50 to 59                                                                      | 1,647            | 1,741  | 3,396  | 15              | 3,381               |
| 60 to 69                                                                      | 1,199            | 1,220  | 2,421  | 38              | 2,383               |
| 70 to 79                                                                      | 856              | 756    | 1,612  | 157             | 1,455               |
| 80 to 89                                                                      | 495              | 780    | 1,275  | 379             | 896                 |
| 90 and over                                                                   | 229              | 552    | 782    | 315             | 467                 |
| All                                                                           | 14,016           | 14,604 | 28,696 | 909             | 27,787              |

Source: COVID-19 Australia: Epidemiology Report 33 Fortnightly reporting period ending 17 January 202 and Department of Health COVID-19 case number and statistics 1[2, 16]

## Model Test Results

Briefly, from January 2020 to January 2021, there were 28,696 cases and 909 deaths due to COVID-19 in Australia [2]. During this period, total base case burden of 8,855 (95%CI: 8,471-9,267) was estimated. Including the permanent functional impairment, a potential 12,467(95%CI: 12,039-12,903) was modelled arising from the 2020 COVID-19 outbreak (see Table 3).

Varying acute illness by up to 5% and 10% increase from baseline, did not meaningfully affect the results, with a total DALY of 12,469 (95%CI: 12,027-12,914) and 12,470 (95%CI: 12,034-12,939) respectively (Tables 4 and 5). Varying estimates of post-acute burden using NSW data, led YLDs to decrease from 565 to 361 compared to the baseline, but with a relatively small impact on total DALYs (12,269 (95%CI: 11,867-12,687)). Table 7 shows the result of the model when assumed recovery duration in the symptomatic phase increased from 14 to 28 days, the symptomatic YLD increased from 69 (95%CI:52-88) to 137 (95%CI:105-176), with only a small impact on total DALYs (12,514 (95%CI: 12,080-12,968)) compared to baseline DALY loss.

**Table 3. DALYS Baseline Results (Using ONS Long COVID data points)**

| Variable                               | Mean      | LCI 95%   | HCI 95%   |
|----------------------------------------|-----------|-----------|-----------|
| <b>YLL</b>                             | 7,263.49  | *         | *         |
| Symptomatic                            | 68.53     | 52.38     | 87.68     |
| Post-acute                             | 564.92    | 375.16    | 791.60    |
| PICS                                   | 958.35    | 635.52    | 1,322.12  |
| Permanent functional impairment with D | 3,611.31  | 3,444.61  | 3,794.39  |
| Permanent functional impairment WOD    | 3,400.56  | 3,233.60  | 3,582.53  |
| TOTAL YLD Baseline                     | 1,591.80  | 1,207.41  | 2,003.45  |
| TOTAL YLD with Diabetes                | 5,203.12  | 4,775.39  | 5,639.72  |
| TOTAL YLD without Diabetes             | 4,992.36  | 4,569.16  | 5,431.28  |
| TOTAL DALYS Baseline                   | 8,855.29  | 8,470.90  | 9,266.93  |
| Total DALYs with Diabetes              | 12,466.60 | 12,038.88 | 12,903.21 |
| Total DALYs without Diabetes           | 12,255.85 | 11,832.64 | 12,694.77 |

*Note: YLL=Years of life lost, YLD= years lived with disability, UI= Uncertainty intervals, LCI= lower confidence interval, HCI= higher confidence interval,*

*\*= not applicable, PICS= post-intensive care syndrome, DALYs= Disability-adjusted life years*

**Table 4. Sensitivity analysis: Results when symptomatic cases were increased to 5%**

| Variable                               | Mean      | LCI 95%   | HCI 95%   |
|----------------------------------------|-----------|-----------|-----------|
| <b>YLL</b>                             | 7,263.49  | *         | *         |
| Symptomatic                            | 72.40     | 56.14     | 93.33     |
| Post-acute                             | 563.36    | 362.85    | 796.72    |
| PICS                                   | 957.28    | 638.12    | 1,326.23  |
| Permanent functional impairment with D | 3,612.53  | 3,441.50  | 3,793.19  |
| Permanent functional impairment WOD    | 3,401.69  | 3,230.35  | 3,579.31  |
| TOTAL YLD Baseline                     | 1,593.03  | 1,198.36  | 2,006.69  |
| TOTAL YLD with Diabetes                | 5,205.57  | 4,763.92  | 5,650.71  |
| TOTAL YLD without Diabetes             | 4,994.72  | 4,557.60  | 5,442.79  |
| TOTAL DALYS Baseline                   | 8,856.52  | 8,461.85  | 9,270.17  |
| Total DALYs with Diabetes              | 12,469.05 | 12,027.40 | 12,914.19 |
| Total DALYs without Diabetes           | 12,258.20 | 11,821.09 | 12,706.28 |

*Note: YLL=Years of life lost, YLD= years lived with disability, UI= Uncertainty intervals, LCI= lower confidence interval, HCI= higher confidence interval, \*= not applicable, PICS= post-intensive care syndrome, DALYs= Disability-adjusted life years*

**Table 5. Results when symptomatic cases were increased to 10%**

| Variable                               | Mean      | LCI 95%   | HCI 95%   |
|----------------------------------------|-----------|-----------|-----------|
| YLL                                    | 7,263.49  |           |           |
| Symptomatic                            | 75.31     | 58.21     | 96.05     |
| Post-acute                             | 564.35    | 368.01    | 789.48    |
| PICS                                   | 955.36    | 623.78    | 1,324.47  |
| Permanent functional impairment with D | 3,611.92  | 3,434.42  | 3,784.60  |
| Permanent functional impairment WOD    | 3,401.20  | 3,228.68  | 3,575.30  |
| TOTAL YLD Baseline                     | 1,595.03  | 1,204.86  | 2,025.52  |
| TOTAL YLD with Diabetes                | 5,206.95  | 4,770.86  | 5,675.23  |
| TOTAL YLD without Diabetes             | 4,996.23  | 4,562.09  | 5,457.33  |
| TOTAL DALYS Baseline                   | 8,858.51  | 8,468.35  | 9,289.00  |
| Total DALYs with Diabetes              | 12,470.43 | 12,034.35 | 12,938.71 |
| Total DALYs without Diabetes           | 12,259.71 | 11,825.58 | 12,720.82 |

*Note: YLL=Years of life lost, YLD= years lived with disability, UI= Uncertainty intervals, LCI= lower confidence interval, HCI= higher confidence interval, \*= not applicable, PICS= post-intensive care syndrome, DALYs= Disability-adjusted life years*

**Table 6. Results when NSW was used in the post-acute consequence health state**

| Variable                               | Mean      | LCI 95%   | HCI 95%   |
|----------------------------------------|-----------|-----------|-----------|
| YLL                                    | 7,263.49  |           |           |
| Symptomatic                            | 68.34     | 52.07     | 86.69     |
| Post-acute                             | 360.67    | 236.06    | 506.96    |
| PICS                                   | 961.42    | 642.22    | 1,317.82  |
| Permanent functional impairment with D | 3,614.89  | 3,440.59  | 3,794.41  |
| Permanent functional impairment WOD    | 3,403.66  | 3,231.03  | 3,583.29  |
| TOTAL YLD Baseline                     | 1,390.42  | 1,024.35  | 1,775.30  |
| TOTAL YLD with Diabetes                | 5,005.31  | 4,603.13  | 5,423.67  |
| TOTAL YLD without Diabetes             | 4,794.09  | 4,392.12  | 5,211.63  |
| TOTAL DALYS Baseline                   | 8,653.91  | 8,287.84  | 9,038.78  |
| Total DALYs with Diabetes              | 12,268.80 | 11,866.61 | 12,687.15 |
| Total DALYs without Diabetes           | 12,057.57 | 11,655.61 | 12,475.11 |

*Note: YLL=Years of life lost, YLD= years lived with disability, UI= Uncertainty intervals, LCI= lower confidence interval, HCI= higher confidence interval, \*= not applicable, PICS= post-intensive care syndrome, DALYs= Disability-adjusted life years*

**Table 7. Results when 28-day symptomatic recovery duration was used**

| Variable                               | Mean      | LCI 95%   | HCI 95%   |
|----------------------------------------|-----------|-----------|-----------|
| YLL                                    | 7,263.49  | *         | *         |
| Symptomatic                            | 136.92    | 104.95    | 175.91    |
| Post-acute                             | 549.21    | 362.09    | 750.60    |
| PICS                                   | 952.00    | 628.80    | 1,300.68  |
| Permanent functional impairment with D | 3,612.65  | 3,444.80  | 3,790.31  |
| Permanent functional impairment WOD    | 3,401.62  | 3,235.69  | 3,575.68  |
| TOTAL YLD Baseline                     | 1,638.13  | 1,253.81  | 2,051.73  |
| TOTAL YLD with Diabetes                | 5,250.78  | 4,816.26  | 5,704.92  |
| TOTAL YLD without Diabetes             | 5,039.74  | 4,609.23  | 5,500.78  |
| TOTAL DALYS Baseline                   | 8,901.61  | 8,517.29  | 9,315.22  |
| Total DALYs with Diabetes              | 12,514.26 | 12,079.74 | 12,968.40 |
| Total DALYs without Diabetes           | 12,303.23 | 11,872.71 | 12,764.26 |

*Note: YLL=Years of life lost, YLD= years lived with disability, UI= Uncertainty intervals, LCI= lower confidence interval, HCI= higher confidence interval, \*= not applicable, PICS= post-intensive care syndrome, DALYs= Disability-adjusted life years*

## References

1. Byambasuren O, Cardona M, Bell K, Clark J, McLaws M-L, Glasziou P. Estimating the extent of asymptomatic COVID-19 and its potential for community transmission: systematic review and meta-analysis. *Official Journal of the Association of Medical Microbiology and Infectious Disease Canada*. 2020;5(4):223-34.
2. COVID-19 National Incident Room Surveillance Team. COVID-19 Australia: Epidemiology Report 33 Fortnightly reporting period ending 17 January 2021 2021; Cited 2021 September 01. Available from: [https://www1.health.gov.au/internet/main/publishing.nsf/Content/novel\\_coronavirus\\_2019\\_ncov\\_weekly\\_epidemiology\\_reports\\_australia\\_2020.htm](https://www1.health.gov.au/internet/main/publishing.nsf/Content/novel_coronavirus_2019_ncov_weekly_epidemiology_reports_australia_2020.htm).
3. COVID-19 National Incident Room Surveillance Team. COVID-19 Australia: Epidemiology Report 42 Reporting period ending 23 May 2021. *Commun Dis Intell* (2018). 2021;45.
4. The National Institute for Health and Care Excellence (NICE). COVID-19 guideline scope: management of the long-term effects of COVID-19: The National Institute for Health and Care Excellence (NICE); 2020; Cited 2021 August 01. Available from: <https://www.nice.org.uk/guidance/ng188/documents/final-scope>.
5. Rajan S, Khunti K, Alwan N, Steves C, MacDermott N, Morsella A, et al. In the wake of the pandemic: preparing for Long COVID: WHO Regional Office for Europe; 2021; Cited 2021 August 01. Available from: <https://www.euro.who.int/en/health-topics/health-emergencies/coronavirus-covid-19/publications-and-technical-guidance/2021/in-the-wake-of-the-pandemic-preparing-for-long-covid-2021>.
6. Cuschieri S, Calleja N, Devleeschauwer B, Wyper GMA. Estimating the direct Covid-19 disability-adjusted life years impact on the Malta population for the first full year. *BMC Public Health*. 2021;21(1):1827.
7. European Burden of Disease Network. Burden of disease of COVID-19: Protocol for country studies 2020; Cited 2021 August 01 Available from: <https://www.burden-eu.net/docs/covid19-bod-protocol.pdf>.
8. Wyper G, Assunção R, Colzani E, Grant I, Haagsma JA, Lagerweij G, et al. Burden of disease methods: a guide to calculate COVID-19 disability-adjusted life years. *International Journal of Public Health*. 2021;66:4.
9. Office for National Statistics. Prevalence of ongoing symptoms following coronavirus (COVID-19) infection in the UK: 1 April 2021: Estimates of the prevalence of self-reported "long COVID", and the duration of ongoing symptoms following confirmed coronavirus infection, using UK Coronavirus (COVID-19) Infection Survey data to 6 March 2021. UK: ONS; 2021; Cited 2021 September 01. Available from: <https://www.ons.gov.uk/peoplepopulationandcommunity/healthandsocialcare/conditionsanddiseases/bulletins/prevalenceofongoingsymptomsfollowingcoronaviruscovid19infectionintheuk/1april2021>.
10. Liu B, Jayasundara D, Pye V, Dobbins T, Dore GJ, Matthews G, et al. Whole of population-based cohort study of recovery time from COVID-19 in New South Wales Australia. *The Lancet Regional Health-Western Pacific*. 2021;12:100193.
11. Rousseau A-F, Minguet P, Colson C, Kellens I, Chaabane S, Delanaye P, et al. Post-intensive care syndrome after a critical COVID-19: cohort study from a Belgian follow-up clinic. *Annals of intensive care*. 2021;11(1):1-9.
12. Hofhuis JG, Schrijvers AJ, Schermer T, Spronk PE. Health-related quality of life in ICU survivors—10 years later. *Scientific Reports*. 2021;11(1):1-10.



13. Cuthbertson BH, Roughton S, Jenkinson D, Maclennan G, Vale L. Quality of life in the five years after intensive care: a cohort study. Crit Care. 2010;14(1):R6-R.
14. Byrnes J, Ball J, Gao L, Kai Chan Y, Kularatna S, Stewart S, et al. Within trial cost-utility analysis of disease management program for patients hospitalized with atrial fibrillation: results from the SAFETY trial. Journal of medical economics. 2019;22(9):945-52.
15. Global Burden of Disease Collaborative Network. Global Burden of Disease Study 2019 (GBD 2019) Disability Weights Seattle, United States: Institute for Health Metrics and Evaluation (IHME); 2020; Cited 2021 August 01 Available from: <http://ghdx.healthdata.org/record/ihme-data/gbd-2019-disability-weights>.
16. Department of Health. Coronavirus (COVID-19) case numbers and statistics: Department of Health,; 2021; Cited 2021 June 22. Available from: <https://www.health.gov.au/news/health-alerts/novel-coronavirus-2019-ncov-health-alert/coronavirus-covid-19-current-situation-and-case-numbers>.
